# Supplementary material
Source: PubMed Central journal article supplement (PMC3663712)
Supplement: NIHMS458823-supplement-Supplementary_Information.pdf [file NIHMS458823-supplement-Supplementary_Information.pdf]

# Genome-wide association analyses identify 18 new loci associated with serum urate concentrations

## Supplementary Information

Anna Köttgen<sup>1,2,156</sup>, Eva Albrecht<sup>3,156</sup>, Alexander Teumer<sup>4,156</sup>, Veronique Vitart<sup>5,156</sup>, Jan Krumbsiek<sup>6,156</sup>, Claudia Hundertmark<sup>1</sup>, Giorgio Pistis<sup>7</sup>, Daniela Ruggiero<sup>8</sup>, Conall M O'Seaghdha<sup>9-11</sup>, Toomas Haller<sup>12</sup>, Qiong Yang<sup>5,10,13</sup>, Toshiko Tanaka<sup>14</sup>, Andrew D Johnson<sup>9,10</sup>, Zoltán Kutalik<sup>15,16</sup>, Albert V Smith<sup>17,18</sup>, Julia Shi<sup>19</sup>, Maksim Struchalin<sup>20</sup>, Rita P S Middelberg<sup>21,22</sup>, Morris J Brown<sup>23</sup>, Angelo L Gaffo<sup>24,25</sup>, Nicola Pirastu<sup>26</sup>, Guo Li<sup>27</sup>, Caroline Hayward<sup>5</sup>, Tatijana Zemunik<sup>28</sup>, Jennifer Huffman<sup>5</sup>, Loic Yengo<sup>29,30</sup>, Jing Hua Zhao<sup>31</sup>, Ayse Demirkan<sup>32</sup>, Mary F Feitosa<sup>33</sup>, Xuan Liu<sup>13</sup>, Giovanni Malerba<sup>34</sup>, Lorna M Lopez<sup>35,36</sup>, Pim van der Harst<sup>37</sup>, Xinzhong Li<sup>38</sup>, Marcus E Kleber<sup>39,40</sup>, Andrew A Hicks<sup>41</sup>, Ilja M Nolte<sup>42</sup>, Asa Johansson<sup>43,44</sup>, Federico Murgia<sup>45</sup>, Sarah H Wild<sup>46</sup>, Stephan J L Bakker<sup>47</sup>, John F Peden<sup>48</sup>, Abbas Dehghan<sup>20,49</sup>, Maistella Stei<sup>50</sup>, Albert Tenesa<sup>5,51</sup>, Vasiliki Lagou<sup>52,53</sup>, Perttu Salo<sup>54</sup>, Massimo Mangino<sup>55</sup>, Lynda M Rose<sup>56</sup>, Terho Lehtimäki<sup>57</sup>, Owen M Woodward<sup>58</sup>, Yukinori Okada<sup>59,60</sup>, Adrienne Tin<sup>2</sup>, Christian Müller<sup>61</sup>, Christopher Oldmeadow<sup>62</sup>, Margus Putku<sup>63</sup>, Darina Czamara<sup>64</sup>, Peter Kraft<sup>65</sup>, Laura Froggen<sup>45</sup>, Gian Andri Thun<sup>66,67</sup>, Anne Grotevendt<sup>68</sup>, Gauti Kjartan Gislason<sup>17</sup>, Tamara B Harris<sup>69</sup>, Lenore J Launer<sup>69</sup>, Patrick McArdle<sup>19</sup>, Alan R Shuldiner<sup>19</sup>, Eric Boerwinkle<sup>70</sup>, Josef Coresh<sup>2,71</sup>, Helena Schmidt<sup>72</sup>, Michael Schallert<sup>73</sup>, Nicholas G Martin<sup>22</sup>, Grant W Montgomery<sup>22</sup>, Michiaki Kubo<sup>74</sup>, Yusuke Nakamura<sup>75</sup>, Toshihiro Tanaka<sup>76</sup>, Patricia B Munroe<sup>77</sup>, Nilesh J Samani<sup>78,79</sup>, David R Jacobs Jr<sup>80</sup>, Kiang Liu<sup>81</sup>, Pio D'Adamo<sup>26</sup>, Sheila Ulivi<sup>82</sup>, Jerome I Rotter<sup>83</sup>, Bruce M Psaty<sup>27,84-87</sup>, Peter Vollenweider<sup>88</sup>, Gerard Waeber<sup>88</sup>, Susan Campbell<sup>5</sup>, Olivier Devuyst<sup>89</sup>, Pau Navarro<sup>5</sup>, Ivana Kolcic<sup>28</sup>, Nicholas Hastie<sup>5</sup>, Beverley Balkau<sup>90</sup>, Philippe Froguel<sup>29,91</sup>, Tõnu Esko<sup>12,63</sup>, Andres Salumets<sup>12,92,93</sup>, Kay Tee Khaw<sup>94</sup>, Claudia Langenberg<sup>31</sup>, Nicholas J Wareham<sup>31</sup>, Aaron Isaacs<sup>32</sup>, Aldi Kraja<sup>33</sup>, Qunyan Zhang<sup>33</sup>, Philipp S Wild<sup>95,96</sup>, Rodney J Scott<sup>97</sup>, Elizabeth G Holliday<sup>62</sup>, Elin Org<sup>63</sup>, Margus Vügingmaa<sup>98,99</sup>, Stefania Bandinelli<sup>100</sup>, Jeffrey E Metter<sup>14</sup>, Antonio Lupo<sup>101</sup>, Elisabetta Trabetti<sup>34</sup>, Rossella Sorice<sup>8</sup>, Angela Döring<sup>102,103</sup>, Eva Lattka<sup>104</sup>, Konstantin Strauch<sup>3,105</sup>, Fabian Theis<sup>6</sup>, Melanie Waldenberger<sup>104</sup>, H-Erich Wichmann<sup>103,106,107</sup>, Gail Davies<sup>35</sup>, Alan J Gow<sup>35,36</sup>, Marcel Bruinenberg<sup>108</sup>, LifeLines Cohort Study<sup>109</sup>, Ronald P Stolk<sup>42</sup>, Jaspal S Kooner<sup>110,111</sup>, Weihua Zhang<sup>111,112</sup>, Bernhard R Winkelmann<sup>113</sup>, Bernhard O Boehm<sup>114</sup>, Susanne Lucae<sup>64</sup>, Brenda W Penninx<sup>115-117</sup>, Johannes H Smit<sup>115</sup>, Gary Curhan<sup>118</sup>, Poorva Mudgal<sup>65</sup>, Robert M Plenge<sup>119-121</sup>, Laura Portas<sup>45</sup>, Ivana Persico<sup>45</sup>, Mirna Kirin<sup>46</sup>, James F Wilson<sup>46</sup>, Irene Mateo Leach<sup>122</sup>, Wiek H van Gilst<sup>122</sup>, Anuj Goel<sup>48</sup>, Halit Ongen<sup>48</sup>, Albert Hofman<sup>20,49</sup>, Fernando Rivadeneira<sup>20,49,123</sup>, Andre G Uitterlinden<sup>20,49,123</sup>, Medea Imboden<sup>66,67</sup>, Arnold von Eckardstein<sup>124</sup>, Francesco Cucca<sup>50</sup>, Ramaiah Nagaraja<sup>125</sup>, Maria Grazia Piras<sup>50</sup>, Matthias Nauck<sup>68</sup>, Claudia Schumann<sup>4</sup>, Kathrin Budde<sup>68</sup>, Florian Ernst<sup>4</sup>, Susan M Farrington<sup>5</sup>, Evropi Theodoratou<sup>46</sup>, Inga Prokopenko<sup>52,53</sup>, Michael Stumvoll<sup>126,127</sup>, Antti Jula<sup>128</sup>, Markus Perola<sup>12,54,129</sup>, Veikko Salomaa<sup>54</sup>, So-Youn Shim<sup>130</sup>, Tim D Spector<sup>55</sup>, Cinzia Sala<sup>7</sup>, Paul M Ridker<sup>56,131</sup>, Mika Kähönen<sup>132</sup>, Jorma Viikari<sup>133</sup>, Christian Hengstenberg<sup>134</sup>, Christopher P Nelson<sup>78,79</sup>, CARDIoGRAM Consortium<sup>109</sup>, DIAGRAM Consortium<sup>109</sup>, ICBP Consortium<sup>109</sup>, MAGIC Consortium<sup>109</sup>, James F Meschia<sup>135</sup>, Michael A Nalls<sup>136</sup>, Pankaj Sharma<sup>137</sup>, Andrew B Singleton<sup>136</sup>, Naoyuki Kamatani<sup>138</sup>, Tanja Zeller<sup>61</sup>, Michel Burnier<sup>139</sup>, John Attia<sup>62</sup>, Maris Laan<sup>63</sup>, Norman Klopp<sup>104</sup>, Hans L Hillege<sup>37</sup>, Stefan Kloiber<sup>64</sup>, Hyon Choi<sup>118,140,141</sup>, Mario Pirastu<sup>45</sup>, Silvia Tore<sup>45</sup>, Nicole M Probst-Hensch<sup>66,67</sup>, Henry

Völzke<sup>142</sup>, Vilmundur Gudnason<sup>17,18</sup>, Afshin Parsa<sup>19</sup>, Reinhold Schmidt<sup>73</sup>, John B Whitfield<sup>22</sup>, Myriam Fomage<sup>143,144</sup>, Paolo Gasparini<sup>26</sup>, David S Siscovick<sup>27,84,85</sup>, Ozren Polasek<sup>28</sup>, Hary Campbell<sup>46</sup>, Igor Rudan<sup>28,46</sup>, Nabila Bouatia-Naji<sup>29</sup>, Andres Metspalu<sup>12,63</sup>, Ruth J F Loos<sup>31</sup>, Cornelia M van Duijn<sup>32</sup>, Ingrid B Borecki<sup>33,145</sup>, Luigi Ferrucci<sup>14</sup>, Giovanni Gambaro<sup>146</sup>, Ian J Deary<sup>35,36</sup>, Bruce H R Wolffenbuttel<sup>147</sup>, John C Chambers<sup>111,112</sup>, Winfried März<sup>40,148</sup>, Peter P Pramstaller<sup>41</sup>, Harold Snieder<sup>42</sup>, Ulf Gyllenstein<sup>44</sup>, Alan F Wright<sup>5</sup>, Gerjan Navis<sup>149</sup>, Hugh Watkins<sup>48,150</sup>, Jacqueline C M Witteman<sup>20,49</sup>, Serena Sanna<sup>50</sup>, Sabine Schipf<sup>142</sup>, Malcolm G Dunlop<sup>5</sup>, Anke Tönjes<sup>126,127</sup>, Samuli Ripatti<sup>128–130</sup>, Nicole Soranzo<sup>130</sup>, Daniela Toniolo<sup>7,151</sup>, Daniel I Chasman<sup>56,131</sup>, Olli Raitakari<sup>152,153</sup>, W H Linda Kao<sup>2,71</sup>, Marina Ciullo<sup>8,156,157</sup>, Caroline S Fox<sup>9,10,154,156,157</sup>, Mark Caulfield<sup>77,156,157</sup>, Murielle Bochud<sup>155–157</sup> & Christian Gieger<sup>3,156,157</sup>

<sup>1</sup>Renal Division, Freiburg University Hospital, Freiburg, Germany. <sup>2</sup>Department of Epidemiology, Johns Hopkins Bloomberg School of Public Health, Baltimore, Maryland, USA. <sup>3</sup>Institute of Genetic Epidemiology, Helmholtz Zentrum München—German Research Center for Environmental Health, Neuherberg, Germany. <sup>4</sup>Interfaculty Institute for Genetics and Functional Genomics, Ernst-Moritz-Arndt-University Greifswald, Greifswald, Germany. <sup>5</sup>Medical Research Council (MRC) Human Genetics Unit, MRC Institute of Genetics and Molecular Medicine (IGMM), University of Edinburgh, Edinburgh, UK. <sup>6</sup>Institute of Bioinformatics and Systems Biology, Helmholtz Zentrum München—German Research Center for Environmental Health, Neuherberg, Germany. <sup>7</sup>Division of Genetics and Cell Biology, San Raffaele Scientific Institute, Milan, Italy. <sup>8</sup>Institute of Genetics and Biophysics A. Buzzati-Traverso, Consiglio Nazionale delle Ricerche (CNR), Naples, Italy. <sup>9</sup>National Heart, Lung, and Blood Institute's Framingham Heart Study, Framingham, Massachusetts, USA. <sup>10</sup>National Heart, Lung, and Blood Institute's Center for Population Studies, Framingham, Massachusetts, USA. <sup>11</sup>Renal Division, Massachusetts General Hospital, Boston, Massachusetts, USA. <sup>12</sup>Estonian Genome Center, University of Tartu, Tartu, Estonia. <sup>13</sup>Department of Biostatistics, Boston University, Boston, Massachusetts, USA. <sup>14</sup>Clinical Research Branch, National Institute on Aging, Baltimore, Maryland, USA. <sup>15</sup>Department of Medical Genetics, University of Lausanne, Lausanne, Switzerland. <sup>16</sup>Swiss Institute of Bioinformatics, Lausanne, Switzerland. <sup>17</sup>Icelandic Heart Association Research Institute, Kopavogur, Iceland. <sup>18</sup>Faculty of Medicine, University of Iceland, Reykjavik, Iceland. <sup>19</sup>University of Maryland School of Medicine, Baltimore, Maryland, USA. <sup>20</sup>Department of Epidemiology, Erasmus Medical Center, Rotterdam, The Netherlands. <sup>21</sup>Department of Medicine, Prince Charles Hospital, Chermanside, Queensland, Australia. <sup>22</sup>Genetic Epidemiology, Queensland Institute of Medical Research, Brisbane, Queensland, Australia. <sup>23</sup>Clinical Pharmacology Unit, University of Cambridge, Cambridge, UK. <sup>24</sup>Division of Rheumatology, University of Alabama at Birmingham, Birmingham, Alabama, USA. <sup>25</sup>Birmingham Veterans Affairs Medical Center, University of Alabama at Birmingham, Birmingham, Alabama, USA. <sup>26</sup>Institute for Maternal and Child Health, Istituto di Ricovero e Cura a Carattere Scientifico (IRCCS) Burlo Garofolo—Trieste, University of Trieste, Trieste, Italy. <sup>27</sup>Cardiovascular Health Research Unit, University of Washington, Seattle, Washington, USA. <sup>28</sup>Faculty of Medicine, University of Split, Split, Croatia. <sup>29</sup>Centre National de la Recherche Scientifique (CNRS) Unité Mixte de Recherche (UMR) 8199, Genomics and Molecular Physiology of Metabolic Diseases, Institut Pasteur de Lille, Lille, France. <sup>30</sup>CNRS UMR 8524, Laboratory of Mathematics, University Lille 1, Model for Data Analysis and Learning (MODAL) Team, Institut National de Recherche en Informatique et en Automatique (INRIA) Lille Nord-Europe, Lille, France. <sup>31</sup>MRC Epidemiology Unit, Institute of Metabolic Science, Addenbrooke's Hospital, Cambridge, UK. <sup>32</sup>Subdivision of Genetic Epidemiology, Department of Epidemiology, Erasmus Medical Center, Rotterdam, The Netherlands. <sup>33</sup>Division of Statistical Genomics, Department of Genetics, Washington University School of Medicine, St. Louis, Missouri, USA. <sup>34</sup>Biology and Genetics Section, Department of Life and Reproduction Sciences, University of Verona, Verona, Italy. <sup>35</sup>Department of Psychology, The University of Edinburgh, Edinburgh, UK. <sup>36</sup>Centre for Cognitive Ageing and Cognitive Epidemiology, The University of Edinburgh, Edinburgh, UK. <sup>37</sup>Department of Cardiology, University Medical Center Groningen, University of Groningen, Groningen, The Netherlands. <sup>38</sup>Institute of Clinical Science, Faculty of Medicine, Imperial College London, London, UK. <sup>39</sup>Ludwigshafen Risk and Cardiovascular Health (LURIC) Study, Freiburg, Germany. <sup>40</sup>Mannheim Institute of Public Health, Social and Preventive Medicine, Medical Faculty Mannheim, University of Heidelberg, Mannheim, Germany. <sup>41</sup>Center for

Biomedicine, European Academy Bozen/Bolzano (EURAC), Bolzano, Italy (affiliated institute of the University of Lübeck). <sup>42</sup>Department of Epidemiology, University Medical Center Groningen, University of Groningen, Groningen, The Netherlands. <sup>43</sup>Uppsala Clinical Research Center, Uppsala University Hospital, Uppsala, Sweden. <sup>44</sup>Department of Immunology, Genetics and Pathology, Rudbeck Laboratory, Uppsala University, Uppsala, Sweden. <sup>45</sup>Institute of Population Genetics, CNR, Sassari, Italy. <sup>46</sup>Centre for Population Health Sciences, The University of Edinburgh Medical School, Edinburgh, UK. <sup>47</sup>Department of Internal Medicine, University Medical Center Groningen, University of Groningen, Groningen, The Netherlands. <sup>48</sup>Department of Cardiovascular Medicine, Wellcome Trust Centre for Human Genetics, University of Oxford, Oxford, UK. <sup>49</sup>Member of Netherlands Consortium for Healthy Aging (NCHA), Leiden, The Netherlands. <sup>50</sup>Istituto di Ricerca Genetica e Biomedica, Consiglio Nazionale delle Ricerche, Monserrato, Italy. <sup>51</sup>Roslin Institute, The University of Edinburgh, Edinburgh, UK. <sup>52</sup>Oxford Centre for Diabetes, Endocrinology and Metabolism, University of Oxford, Oxford, UK. <sup>53</sup>Wellcome Trust Centre for Human Genetics, University of Oxford, Oxford, UK. <sup>54</sup>Department of Chronic Disease Prevention, National Institute for Health and Welfare, Helsinki, Finland. <sup>55</sup>King's College London, St Thomas' Hospital Campus, London, UK. <sup>56</sup>Division of Preventive Medicine, Brigham and Women's Hospital, Boston, Massachusetts, USA. <sup>57</sup>Fimlab Laboratories, University of Tampere and Tampere University Hospital, Tampere, Finland. <sup>58</sup>Department of Physiology, Johns Hopkins University School of Medicine, Baltimore, Maryland, USA. <sup>59</sup>Laboratory for Statistical Analysis, Center for Genomic Medicine, RIKEN, Tokyo, Japan. <sup>60</sup>Department of Allergy and Rheumatology, Graduate School of Medicine, University of Tokyo, Tokyo, Japan. <sup>61</sup>University Heart Center Hamburg, Clinic for General and Interventional Cardiology, Hamburg, Germany. <sup>62</sup>School of Medicine and Public Health, University of Newcastle, Newcastle, New South Wales, Australia. <sup>63</sup>Institute of Molecular and Cell Biology, University of Tartu, Tartu, Estonia. <sup>64</sup>Max Planck Institute of Psychiatry, Munich, Germany. <sup>65</sup>Program in Molecular and Genetic Epidemiology, Harvard School of Public Health, Boston, Massachusetts, USA. <sup>66</sup>Swiss Tropical and Public Health Institute, Basel, Switzerland. <sup>67</sup>University of Basel, Basel, Switzerland. <sup>68</sup>Institute of Clinical Chemistry and Laboratory Medicine, University Medicine Greifswald, Ernst-Moritz-Arndt-University Greifswald, Greifswald, Germany. <sup>69</sup>Laboratory of Epidemiology, Demography and Biometry, National Institute on Aging, Bethesda, Maryland, USA. <sup>70</sup>University of Texas Health Science Center at Houston, Houston, Texas, USA. <sup>71</sup>Welch Center for Prevention, Epidemiology and Clinical Research, John Hopkins University, Baltimore, Maryland, USA. <sup>72</sup>Institute of Molecular Biology and Biochemistry, Medical University Graz, Graz, Austria. <sup>73</sup>Department of Neurology, Section of Special Neurology, Medical University Graz, Graz, Austria. <sup>74</sup>Laboratory for Genotyping Development, Center for Genomic Medicine, RIKEN, Yokohama, Japan. <sup>75</sup>Laboratory of Molecular Medicine, Human Genome Center, Institute of Medical Science, University of Tokyo, Tokyo, Japan. <sup>76</sup>Laboratory for Cardiovascular Diseases, Center for Genomic Medicine, RIKEN, Yokohama, Japan. <sup>77</sup>William Harvey Research Institute, Barts and The London School of Medicine and Dentistry, Queen Mary University of London, London, UK. <sup>78</sup>Leicester National Institute for Health Research (NIHR) Biomedical Research Unit in Cardiovascular Disease, Glenfield Hospital, Leicester, UK. <sup>79</sup>Department of Cardiovascular Sciences, University of Leicester, Leicester, UK. <sup>80</sup>Division of Epidemiology and Community Health, University of Minnesota, Minneapolis, Minnesota, USA. <sup>81</sup>Department of Preventive Medicine, Feinberg School of Medicine, Northwestern University, Chicago, Illinois, USA. <sup>82</sup>Institute for Maternal and Child Health, IRCCS Burlo Garofolo-Trieste, Trieste, Italy. <sup>83</sup>Medical Genetics Institute, Cedars-Sinai Medical Center, Los Angeles, California, USA. <sup>84</sup>Department of Epidemiology, University of Washington, Seattle, Washington, USA. <sup>85</sup>Department of Medicine, University of Washington, Seattle, Washington, USA. <sup>86</sup>Group Health Research Institute, Group Health Cooperative, Seattle, Washington, USA. <sup>87</sup>Department of Health Services, University of Washington, Seattle, Washington, USA. <sup>88</sup>Department of Medicine, Internal Medicine, Lausanne University Hospital, Lausanne, Switzerland. <sup>89</sup>Institute of Physiology, Zurich Center for Integrative Human Physiology (ZIHP), University of Zurich, Zurich, Switzerland. <sup>90</sup>Unité Mixte de Recherche en Santé (UMRS) 1018, University Paris Sud 11, Villejuif, France. <sup>91</sup>Department of Genomics of Common Disease, School of Public Health, Imperial College London, Hammersmith Hospital, London, UK. <sup>92</sup>Competence Centre on Reproductive Medicine and Biology, Tartu, Estonia. <sup>93</sup>Department of Obstetrics and Gynecology, University of Tartu, Tartu, Estonia. <sup>94</sup>Clinical Gerontology Unit, Addenbrooke's Hospital, Cambridge, UK. <sup>95</sup>Center for Thrombosis and Hemostasis, University Medical Center Mainz, Johannes Gutenberg University Mainz, Mainz, Germany. <sup>96</sup>Department of Medicine II, University Medical Center Mainz, Johannes Gutenberg University Mainz,

Mainz, Germany.<sup>97</sup>School of Biomedical Sciences and Pharmacy, University of Newcastle, Newcastle, New South Wales, Australia.<sup>98</sup>Chair of Medical Physics, Department of Biomedical Engineering, Tallinn University of Technology, Tallinn, Estonia.<sup>99</sup>Centre of Cardiology, North Estonia Medical Centre, Tallinn, Estonia.<sup>100</sup>Geriatric Unit, Azienda Sanitaria Firenze (ASF), Florence, Italy.<sup>101</sup>Division of Nephrology, Department of Medicine, University of Verona, Verona, Italy.<sup>102</sup>Institute of Epidemiology II, Helmholtz Zentrum München–German Research Center for Environmental Health, Neuherberg, Germany.<sup>103</sup>Institute of Epidemiology I, Helmholtz Zentrum München–German Research Center for Environmental Health, Neuherberg, Germany.<sup>104</sup>Research Unit of Molecular Epidemiology, Helmholtz Zentrum München–German Research Center for Environmental Health, Neuherberg, Germany.<sup>105</sup>Chair of Genetic Epidemiology, Institute of Medical Informatics, Biometry and Epidemiology, Ludwig-Maximilians-University, Munich, Germany.<sup>106</sup>Chair of Epidemiology, Institute of Medical Informatics, Biometry and Epidemiology, Ludwig-Maximilians-University, Munich, Germany.<sup>107</sup>Klinikum Grosshadern, Munich, Germany.<sup>108</sup>University Medical Center Groningen, LifeLines Department, University of Groningen, Groningen, The Netherlands.<sup>109</sup>A list of contributing members appears in the **Supplementary Note**.<sup>110</sup>Faculty of Medicine, National Heart & Lung Institute, Cardiovascular Science, Hammersmith Hospital, Hammersmith Campus, Imperial College London, London, UK.<sup>111</sup>Cath Laboratory, Cardiology, Ealing Hospital, Southall, UK.<sup>112</sup>Department of Epidemiology and Biostatistics, School of Public Health, Imperial College London, London, UK.<sup>113</sup>ClinPhenomics Study Center, Frankfurt, Germany.<sup>114</sup>Division of Endocrinology and Diabetes, Department of Medicine, University Hospital, Ulm, Germany.<sup>115</sup>Department of Psychiatry, EMGO Institute for Health and Care Research, VU University Medical Centre, Amsterdam, The Netherlands.<sup>116</sup>Department of Psychiatry, University Medical Centre Groningen, University of Groningen, Groningen, The Netherlands.<sup>117</sup>Department of Psychiatry, Leiden University Medical Center, Leiden, The Netherlands.<sup>118</sup>Channing Laboratory, Department of Medicine, Brigham and Women's Hospital, Harvard Medical School, Boston, Massachusetts, USA.<sup>119</sup>Division of Rheumatology, Immunology and Allergy, Brigham and Women's Hospital, Boston, Massachusetts, USA.<sup>120</sup>Division of Genetics, Brigham and Women's Hospital, Boston, Massachusetts, USA.<sup>121</sup>Broad Institute of MIT and Harvard, Cambridge, Massachusetts, USA.<sup>122</sup>Division of Experimental Cardiology, Department of Cardiology, University Medical Center Groningen, University of Groningen, Groningen, The Netherlands.<sup>123</sup>Department of Internal Medicine, Erasmus Medical Center, Rotterdam, The Netherlands.<sup>124</sup>Institute of Clinical Chemistry, University Hospital of Zurich, Zurich, Switzerland.<sup>125</sup>Laboratory of Genetics, National Institute on Aging, Baltimore, Maryland, USA.<sup>126</sup>Medical Department, University of Leipzig, Leipzig, Germany.<sup>127</sup>Integrated Research and Treatment Center (IFB) Adiposity Diseases, University of Leipzig, Leipzig, Germany.<sup>128</sup>Department of Chronic Disease Prevention, National Institute for Health and Welfare, Turku, Finland.<sup>129</sup>Institute of Molecular Medicine, University of Helsinki, Helsinki, Finland.<sup>130</sup>Human Genetics, Wellcome Trust Sanger Institute, Hinxton, Cambridge, UK.<sup>131</sup>Harvard Medical School, Boston, Massachusetts, USA.<sup>132</sup>Department of Clinical Physiology, University of Tampere and Tampere University Hospital, Tampere, Finland.<sup>133</sup>Department of Medicine, University of Turku and Turku University Hospital, Turku, Finland.<sup>134</sup>Department of Internal Medicine II, University Hospital Regensburg, Regensburg, Germany.<sup>135</sup>Department of Neurology, Mayo Clinic, Jacksonville, Florida, USA.<sup>136</sup>Molecular Genetics Section, Laboratory of Neurogenetics, National Institute on Aging, US National Institutes of Health, Bethesda, Maryland, USA.<sup>137</sup>Imperial College Cerebrovascular Research Unit, Imperial College London, London, UK.<sup>138</sup>Laboratory for International Alliance, Center for Genomic Medicine, RIKEN, Yokohama, Japan.<sup>139</sup>Nephrology Division, Department of Medicine, Lausanne University Hospital, Lausanne, Switzerland.<sup>140</sup>Section of Rheumatology, Boston University School of Medicine, Boston, Massachusetts, USA.<sup>141</sup>Clinical Epidemiology Research and Training Unit, Boston University School of Medicine, Boston, Massachusetts, USA.<sup>142</sup>Institute for Community Medicine, University Medicine Greifswald, Greifswald, Germany.<sup>143</sup>University of Texas–Houston Institute of Molecular Medicine, Houston, Texas, USA.<sup>144</sup>University of Texas–Houston School of Public Health, Houston, Texas, USA.<sup>145</sup>Division of Biostatistics, Washington University School of Medicine, St. Louis, Missouri, USA.<sup>146</sup>Renal Program, Institute of Internal Medicine, Columbus-Gemelli University Hospital, Catholic University, Rome, Italy.<sup>147</sup>Department of Endocrinology, University Medical Center Groningen, University of Groningen, Groningen, The Netherlands.<sup>148</sup>Synlab Centre of Laboratory Diagnostics, Heidelberg, Germany.<sup>149</sup>Division of Nephrology, Department of Internal Medicine, University Medical Center Groningen, University of Groningen, Groningen, The Netherlands.<sup>150</sup>On behalf of PROCARDIS.<sup>151</sup>Institute of Molecular Genetics, CNR, Pavia, Italy.<sup>152</sup>Research Centre of Applied

and Preventive Cardiovascular Medicine, University of Turku, Turku, Finland. <sup>153</sup>Department of Clinical Physiology and Nuclear Medicine, Turku University Hospital, Turku, Finland. <sup>154</sup>Division of Endocrinology, Brigham and Women's Hospital and Harvard Medical School, Boston, Massachusetts, USA. <sup>155</sup>University Institute of Social and Preventive Medicine, Lausanne, Switzerland. <sup>156</sup>These authors contributed equally to this work. <sup>157</sup>These authors jointly directed this work.

**Correspondence to:**

Anna Köttgen, MD MPH  
Renal Division, Dept. Of Internal Medicine  
University Hospital Freiburg  
Berliner Allee 29  
79110 Freiburg  
Germany  
anna.koettgen@uniklinik-freiburg.de

Veronique Vitart, PhD  
MRC Human Genetics Unit  
Institute of Genetics and Molecular Medicine  
Western General Hospital  
Edinburgh EH4 2XU  
United Kingdom  
veronique.vitart@igmm.ed.ac.uk

Murielle Bochud, MD PhD  
Institute of Social and Preventive Medicine (IUMSP)  
Lausanne University Hospital  
Route de la Corniche 2  
CH-1066 Epalinges  
Switzerland  
murielle.bochud@chuv.ch

Christian Gieger, PhD  
Institute of Genetic Epidemiology  
Helmholtz Zentrum München  
German Research Center for Environmental Health  
Ingolstädter Landstraße 1  
85764 Neuherberg  
Germany  
christian.gieger@helmholtz-muenchen.de

## Table of Contents

|                                                                                                                                                        |           |
|--------------------------------------------------------------------------------------------------------------------------------------------------------|-----------|
| <u>GENOME-WIDE ASSOCIATION ANALYSES IDENTIFY 18 NEW LOCI ASSOCIATED WITH SERUM URATE CONCENTRATIONS</u>                                                | <u>1</u>  |
| <u>SUPPLEMENTARY FIGURES</u>                                                                                                                           | <u>8</u>  |
| SUPPLEMENTARY FIGURE 1: QQ PLOT FOR SERUM URATE GWAS                                                                                                   | 8         |
| SUPPLEMENTARY FIGURE 2: REGIONAL ASSOCIATION PLOTS                                                                                                     | 9         |
| SUPPLEMENTARY FIGURE 3: X CHROMOSOMAL MANHATTAN PLOT                                                                                                   | 54        |
| SUPPLEMENTARY FIGURE 4: MANHATTAN PLOT FOR GOUT GWAS                                                                                                   | 55        |
| SUPPLEMENTARY FIGURE 5: QQ PLOT FOR GOUT GWAS                                                                                                          | 56        |
| SUPPLEMENTARY FIGURE 6: RISK SCORE FIGURE                                                                                                              | 57        |
| SUPPLEMENTARY FIGURE 7: REGIONAL ASSOCIATION PLOTS FOR NETWORK SNPs                                                                                    | 58        |
| SUPPLEMENTARY FIGURE 8: INHIBINS-ACTIVINS NETWORK                                                                                                      | 62        |
| <u>SUPPLEMENTARY TABLES</u>                                                                                                                            | <u>64</u> |
| SUPPLEMENTARY TABLE 1: CHARACTERISTICS OF THE ANALYZED STUDY SAMPLES                                                                                   | 64        |
| SUPPLEMENTARY TABLE 2: STUDY SAMPLE CHARACTERISTICS                                                                                                    | 66        |
| SUPPLEMENTARY TABLE 3: STUDY-SPECIFIC GENOTYPING INFORMATION                                                                                           | 86        |
| SUPPLEMENTARY TABLE 4: ALL SNPs ASSOCIATED WITH SERUM URATE AT $p < 5 * 10^{-8}$                                                                       | 92        |
| SUPPLEMENTARY TABLE 5: RESULTS FROM CONDITIONAL ANALYSES TO TEST INDEPENDENCE                                                                          | 93        |
| SUPPLEMENTARY TABLE 6: SEPARATE RESULTS FROM DISCOVERY, REPLICATION AND COMBINED ANALYSES FOR SNP-URATE ASSOCIATIONS                                   | 95        |
| SUPPLEMENTARY TABLE 7: CHARACTERIZATION OF IMPLICATED LOCI: GENE FUNCTION AND INVESTIGATIONS IN THE NHGRI GWAS CATALOG AND A SERUM METABOLITE DATABASE | 96        |
| SUPPLEMENTARY TABLE 8: X CHROMOSOMAL SNPs ASSOCIATED WITH SERUM URATE AT $p < 1 * 10^{-4}$                                                             | 116       |
| SUPPLEMENTARY TABLE 9: SEX-SPECIFIC EFFECTS FOR URATE-ASSOCIATED SNPs                                                                                  | 118       |
| SUPPLEMENTARY TABLE 10: ALL SNPs ASSOCIATED WITH GOUT AT $p < 1 * 10^{-6}$                                                                             | 120       |
| SUPPLEMENTARY TABLE 11: OVERALL AND SEX-SPECIFIC ASSOCIATIONS WITH PREVALENT AND INCIDENT GOUT                                                         | 121       |
| SUPPLEMENTARY TABLE 12: OVERALL AND SEX-SPECIFIC ASSOCIATION BETWEEN SNPs AND FRACTIONAL EXCRETION OF URIC ACID (FEUA)                                 | 123       |
| SUPPLEMENTARY TABLE 13: ASSOCIATIONS OF URATE-ASSOCIATED SNPs IN AFRICAN AMERICANS AND INDIVIDUALS OF INDIAN AND JAPANESE ANCESTRY                     | 123       |
| SUPPLEMENTARY TABLE 14: ASSOCIATIONS OF URATE-ASSOCIATED INDEX SNPs WITH TRANSCRIPT EXPRESSION                                                         | 124       |
| SUPPLEMENTARY TABLE 15: ASSOCIATION OF REPLICATED URATE-ASSOCIATED SNPs WITH RELATED PHENOTYPES                                                        | 127       |

|                                                                                                                                                         |            |
|---------------------------------------------------------------------------------------------------------------------------------------------------------|------------|
| SUPPLEMENTARY TABLE 16 : RESULTS FROM GRAIL ANALYSES OF URATE-ASSOCIATED SNPs<br>FROM THE DISCOVERY STEP                                                | 128        |
| SUPPLEMENTARY TABLE 17 : FUNCTIONAL NETWORK ASSOCIATIONS UNDERLYING<br>SUPPLEMENTARY FIGURE 8 AND SUPPLEMENTARY FIGURE 9                                | 129        |
| SUPPLEMENTARY TABLE 18 : ASSOCIATED PATHWAYS, PROCESSES OR FUNCTIONS ( $P < 1 \times 10^{-3}$ )<br>BASED ON THE RESULTS FROM INGENUITY PATHWAY ANALYSIS | 130        |
| <u>SUPPLEMENTARY NOTE</u>                                                                                                                               | <u>133</u> |
| PARTICIPATING STUDIES                                                                                                                                   | 133        |
| STATISTICAL METHODS OF SECONDARY ANALYSES                                                                                                               | 133        |
| ANALYSES OF THE X CHROMOSOME                                                                                                                            | 133        |
| ANALYSIS OF SEX-INTERACTIONS                                                                                                                            | 134        |
| GENE-BASED TEST                                                                                                                                         | 134        |
| EVALUATION OF EVIDENCE FOR NOVEL URATE TRANSPORTERS                                                                                                     | 134        |
| RISK SCORE ANALYSES                                                                                                                                     | 135        |
| ASSOCIATION WITH THE FRACTIONAL EXCRETION OF URIC ACID (FEUA)                                                                                           | 135        |
| ASSOCIATION IN INDIVIDUALS OF NON-EUROPEAN ANCESTRIES                                                                                                   | 136        |
| EXPRESSION SNP (ESNP) ANALYSES                                                                                                                          | 136        |
| ASSOCIATIONS OF URATE-ASSOCIATED SNPs WITH OTHER TRAITS                                                                                                 | 136        |
| PATHWAY-BASED ANALYSES                                                                                                                                  | 137        |
| ASSOCIATION WITH SERUM METABOLITE CONCENTRATIONS                                                                                                        | 138        |
| ASSOCIATION WITH OTHER GWAS RESULTS IN THE NHGRI DATABASE                                                                                               | 138        |
| REGIONAL ASSOCIATION PLOTS                                                                                                                              | 138        |
| DE NOVO GENOTYPING INFORMATION                                                                                                                          | 139        |
| SUPPLEMENTARY TEXT 1 : REPLICATED URATE GWAS LOCI IN THE INHIBINS-ACTIVINS<br>PATHWAY                                                                   | 141        |
| SUPPLEMENTARY TEXT 2 : REPLICATED GENES REGULATING GLUCOSE METABOLISM                                                                                   | 142        |
| CONSORTIUM MEMBERSHIPS                                                                                                                                  | 143        |
| THE CARDIOGRAM CONSORTIUM                                                                                                                               | 143        |
| THE ICBP CONSORTIUM                                                                                                                                     | 145        |
| THE MAGIC CONSORTIUM                                                                                                                                    | 146        |
| THE DIAGRAM CONSORTIUM                                                                                                                                  | 152        |
| ACKNOWLEDGMENTS                                                                                                                                         | 155        |
| REFERENCES                                                                                                                                              | 167        |

## Supplementary Figures

### Supplementary Figure 1: QQ Plot for Serum Urate GWAS

Quantile-quantile plot showing observed p-values of the urate meta-analysis vs. expected p-values by chance after removal of SNPs within +/- 1.5 Mb of the index SNP in *SLC2A9* and +/- 1 Mb of the index SNPs at 9 additional known urate-associated loci. A second genomic control step was applied to correct for the post meta-analysis of  $\lambda = 1.12$ .

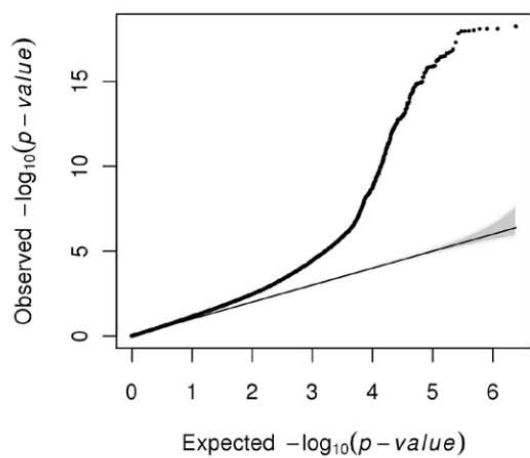



### Supplementary Figure 2: Regional Association Plots

Regional association plot showing  $-\log_{10}$  (p-values) for all SNPs ordered by their chromosomal position within all regions reaching p-values  $<1*10^{-6}$  in the discovery screen of the overall or sex-stratified urate GWAS as well as the candidate urate transporter gene region. For sex-specific loci,  $-\log_{10}$  (p-values) correspond to the respective sex-stratified urate GWAS. Each SNP is colored according to its correlation with the SNP showing the lowest p-value (index SNP) within the region as specified in the color scheme. Correlation structures correspond to HapMap 2 CEU r28. Gray color indicates unknown correlation. Data point symbols correspond to nonsense, non-synonymous, coding, UTR, splice variants, transcription factor binding sites and multi-species conservation according to dbSNP or the 1000 Genomes Project (August 2009 release)<sup>1</sup>. Plots are ordered by rs-number.

#### annotation key

|                |   |
|----------------|---|
| framestop      | ▲ |
| splice         | ▲ |
| nonsyn         | ▼ |
| coding         | □ |
| utr            | □ |
| tfbscons       | * |
| mcs44placental | ⊠ |
| no annotation  | ■ |

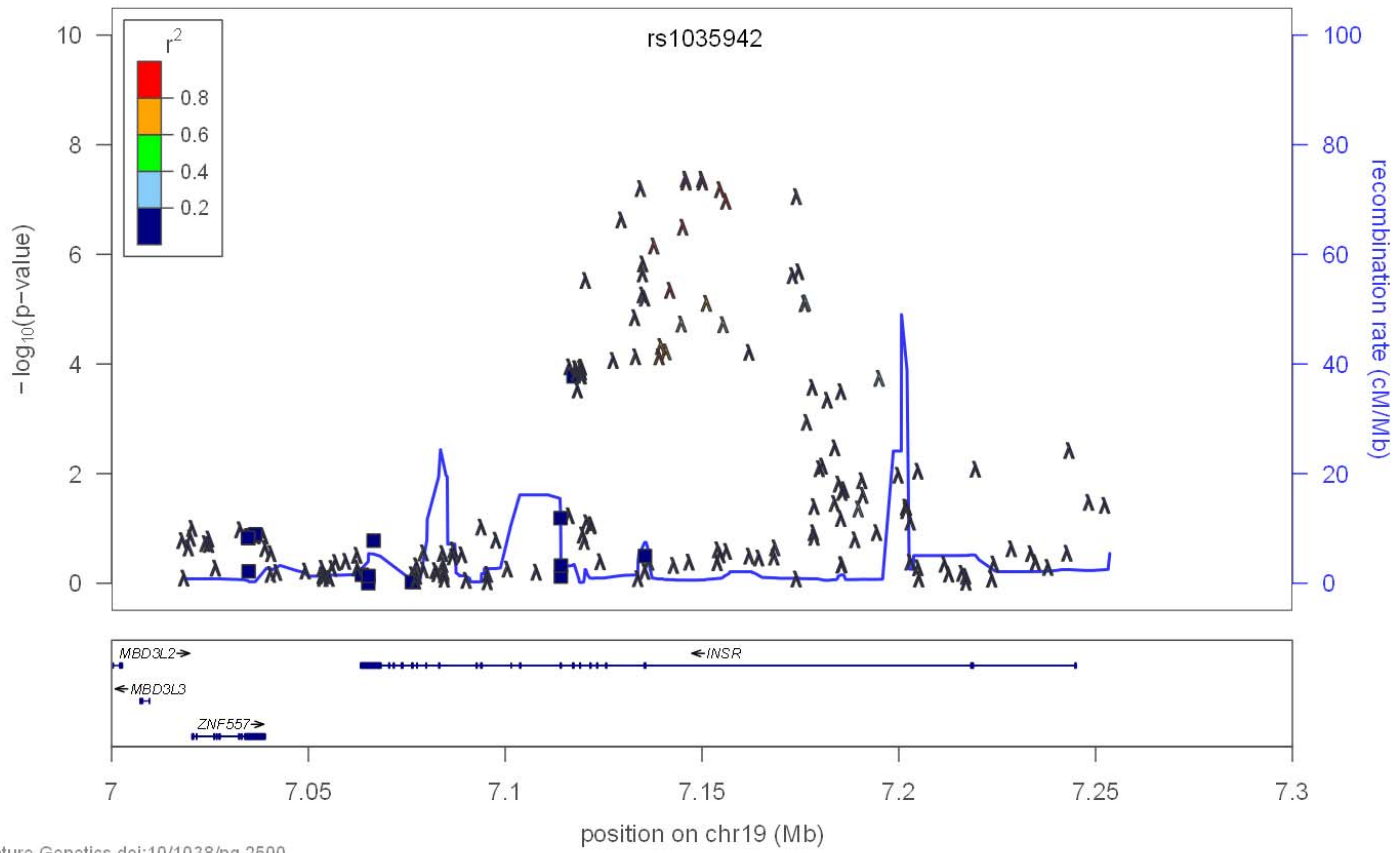

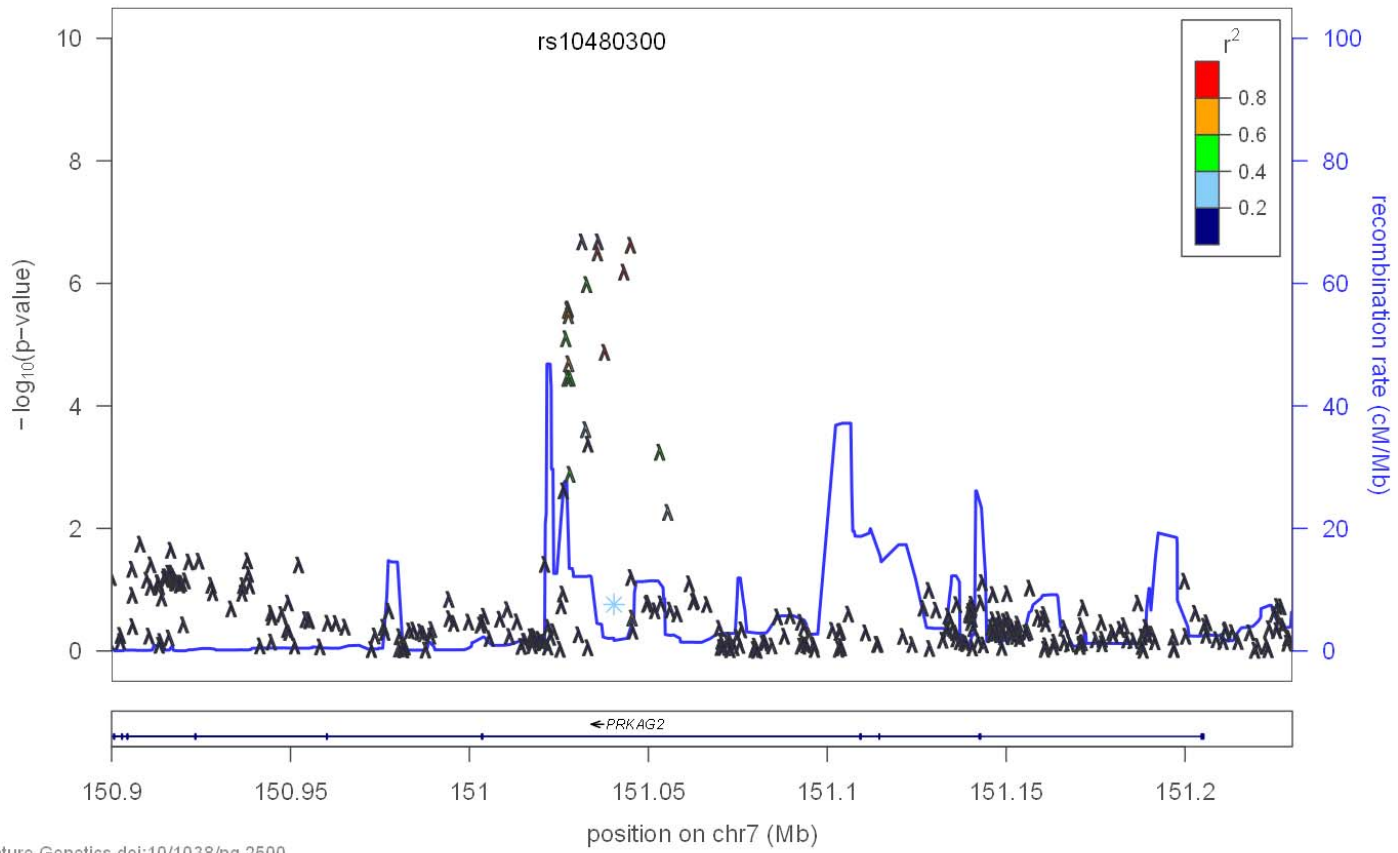

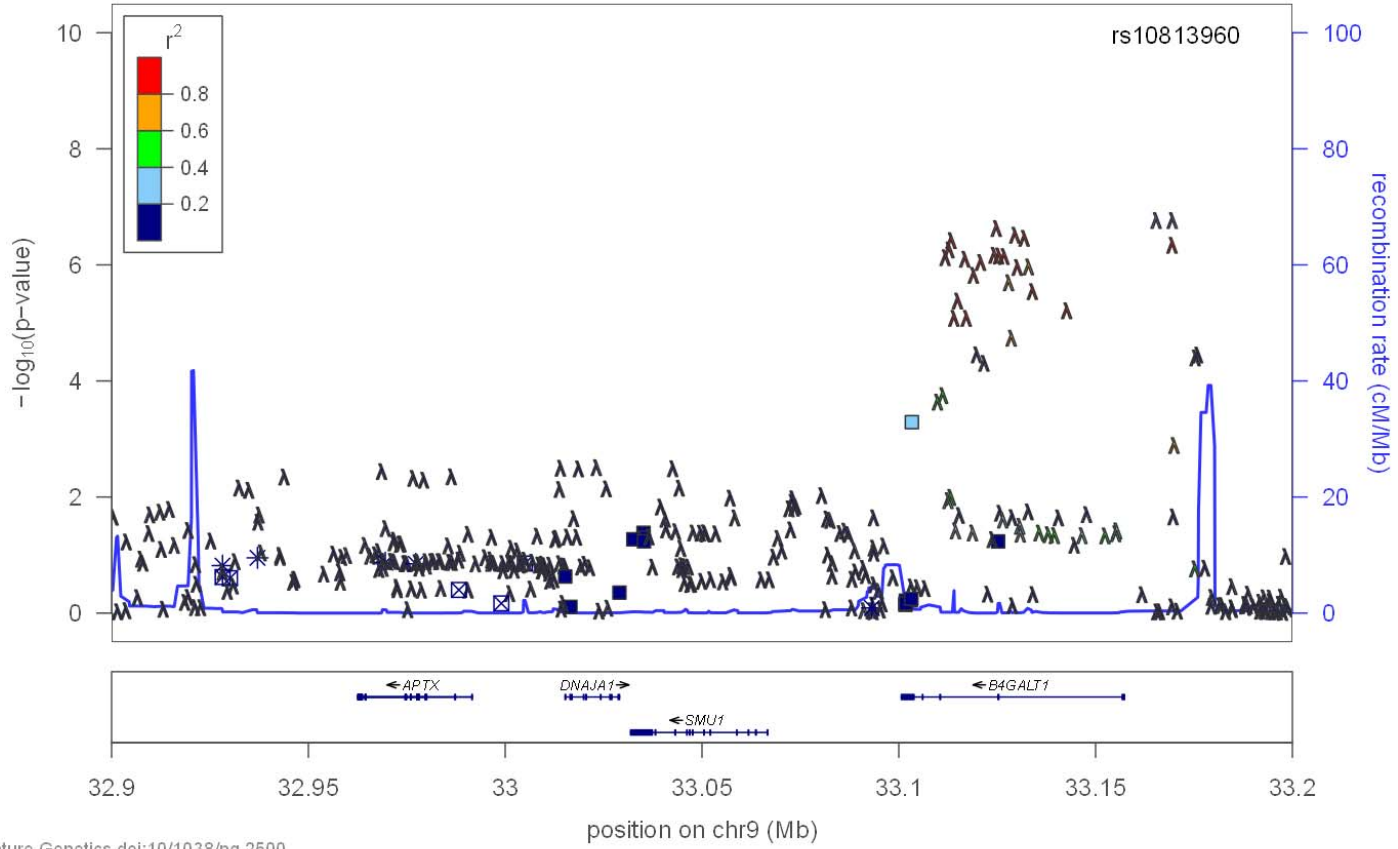

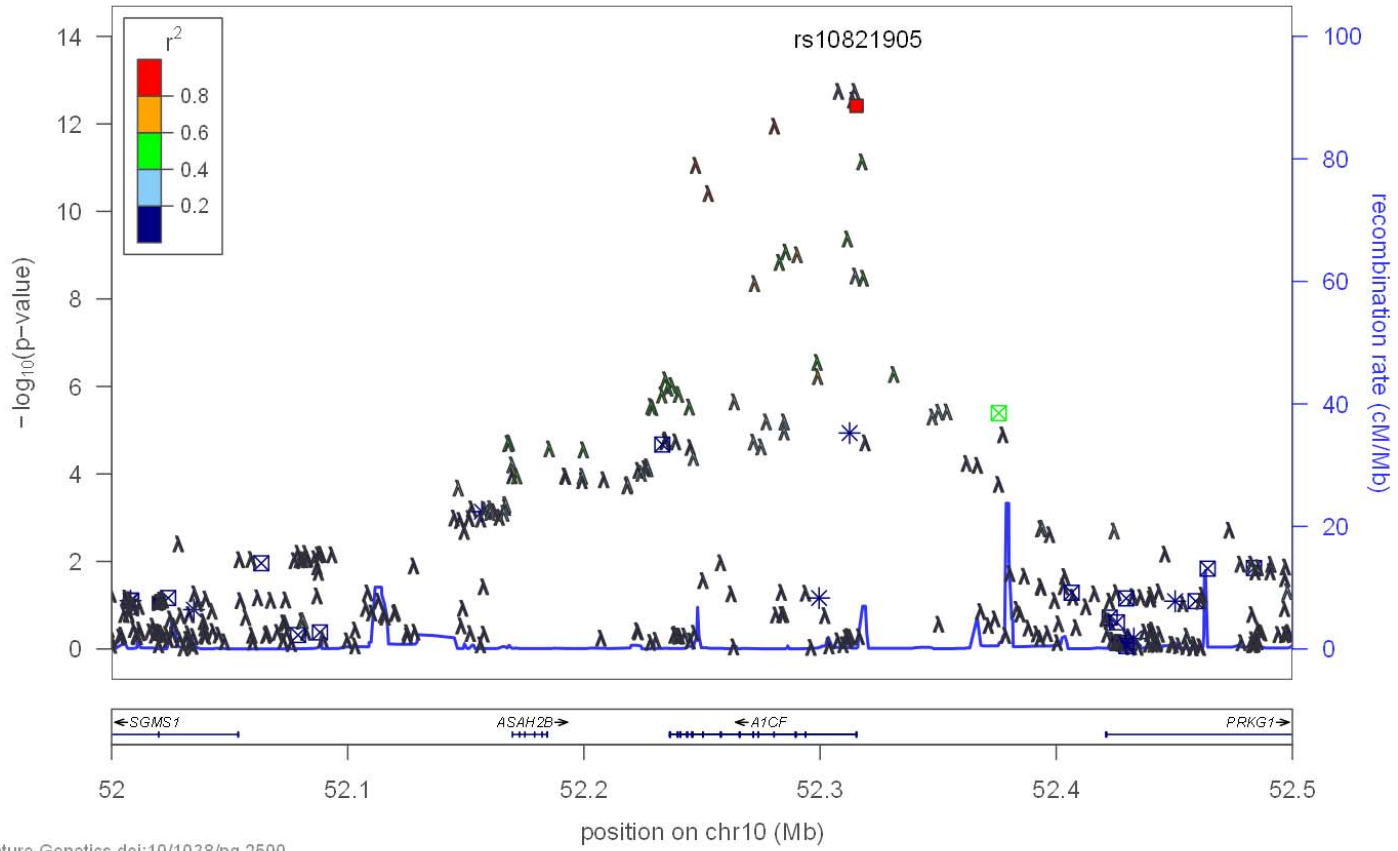

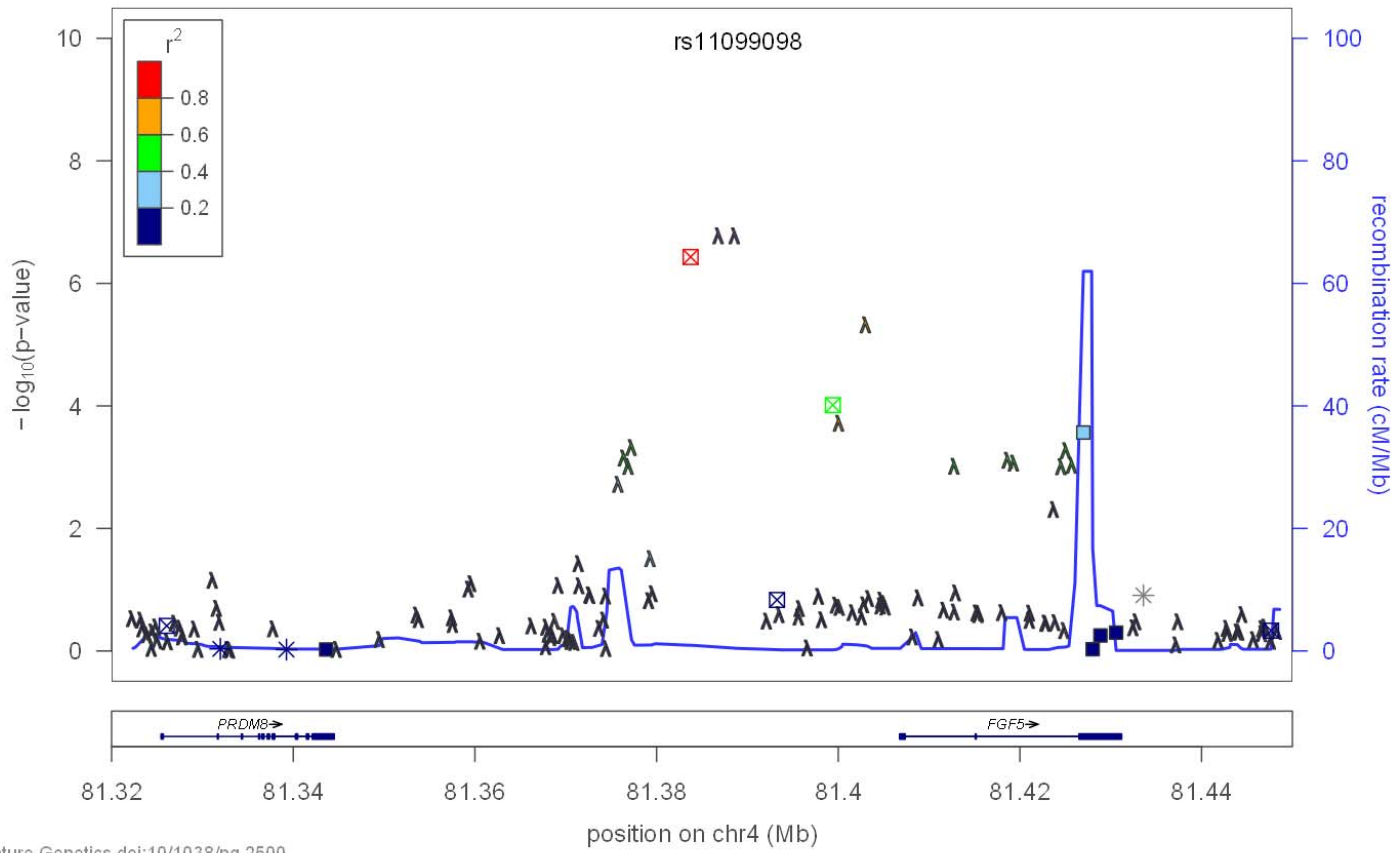

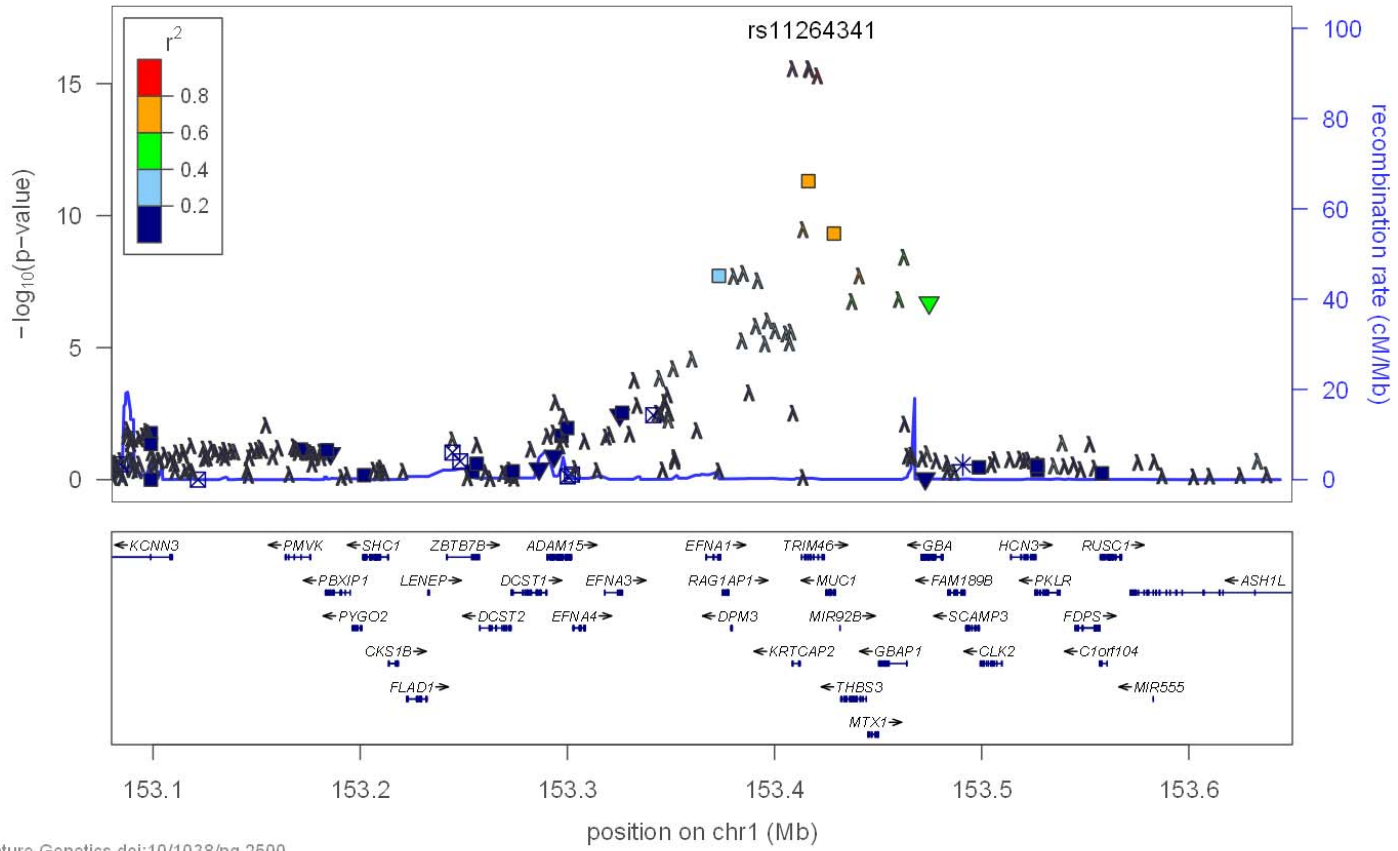

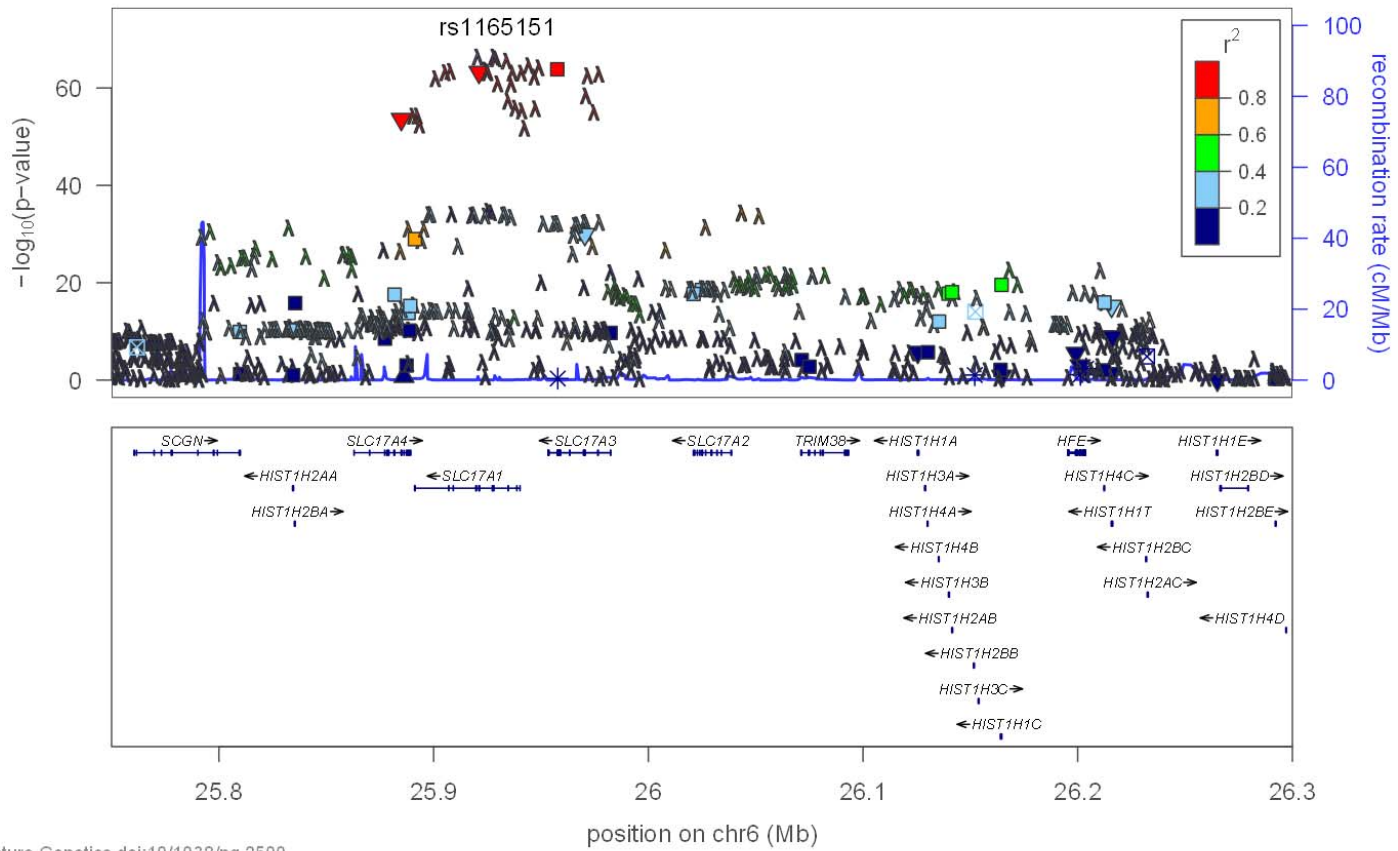



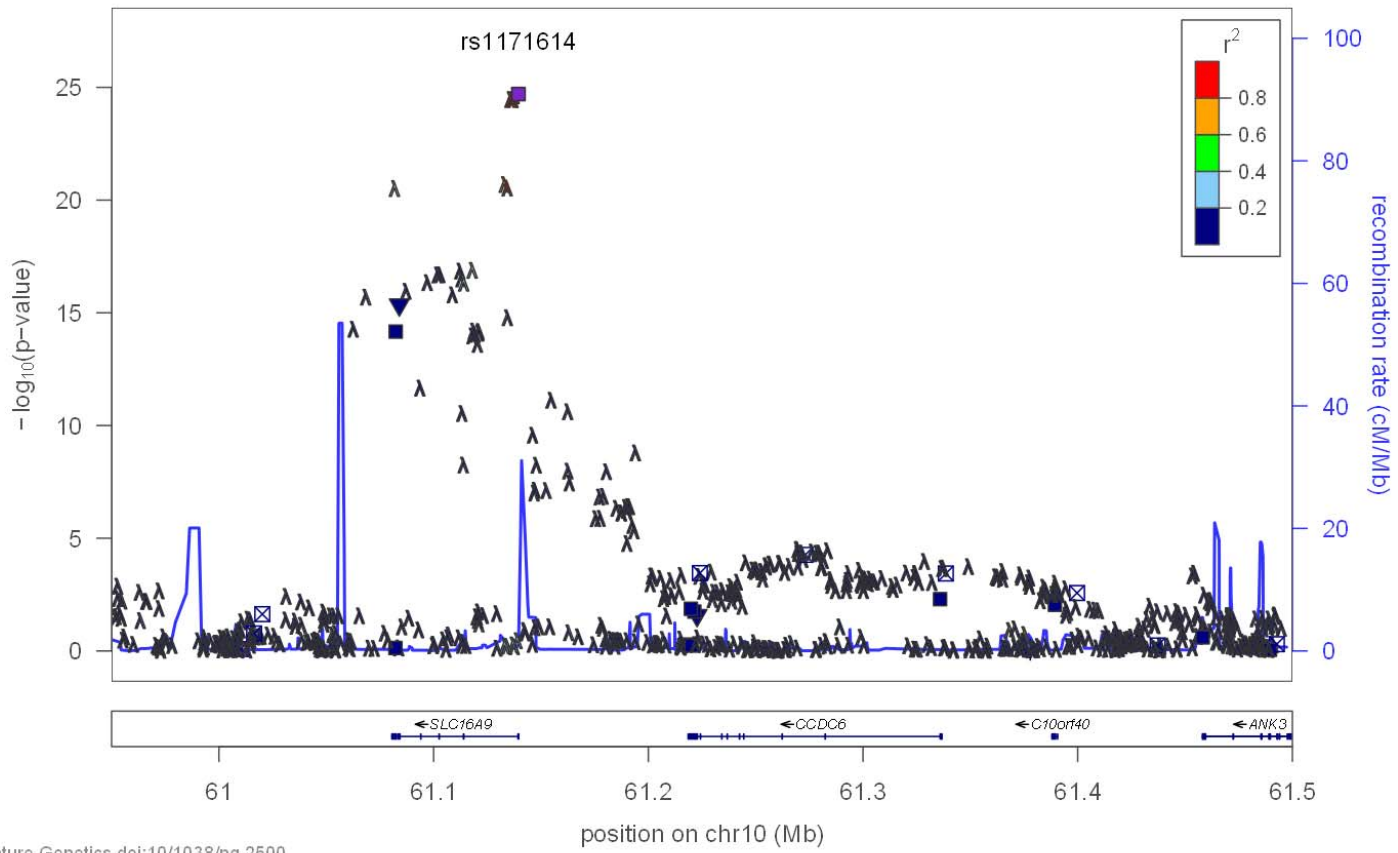

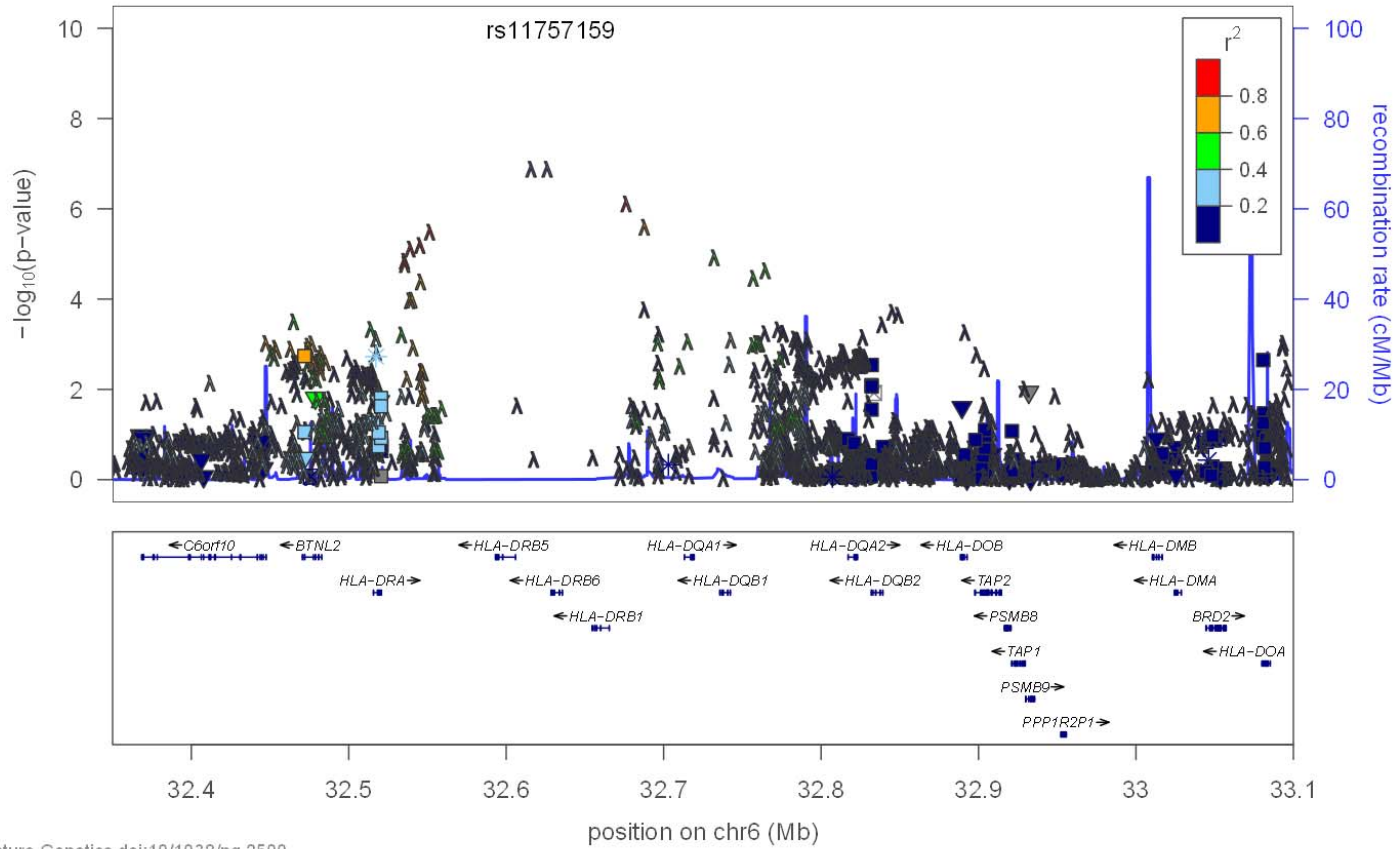

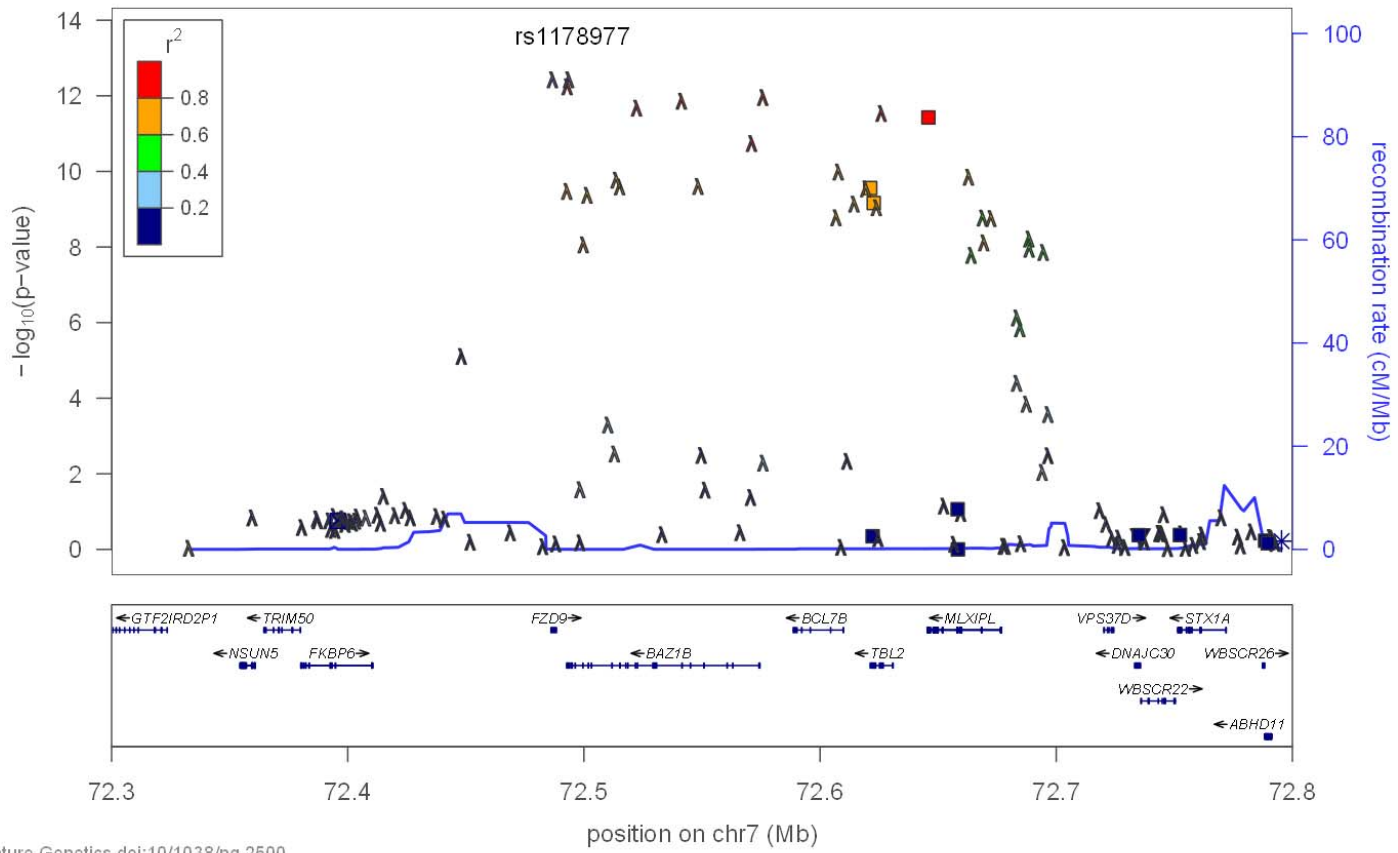

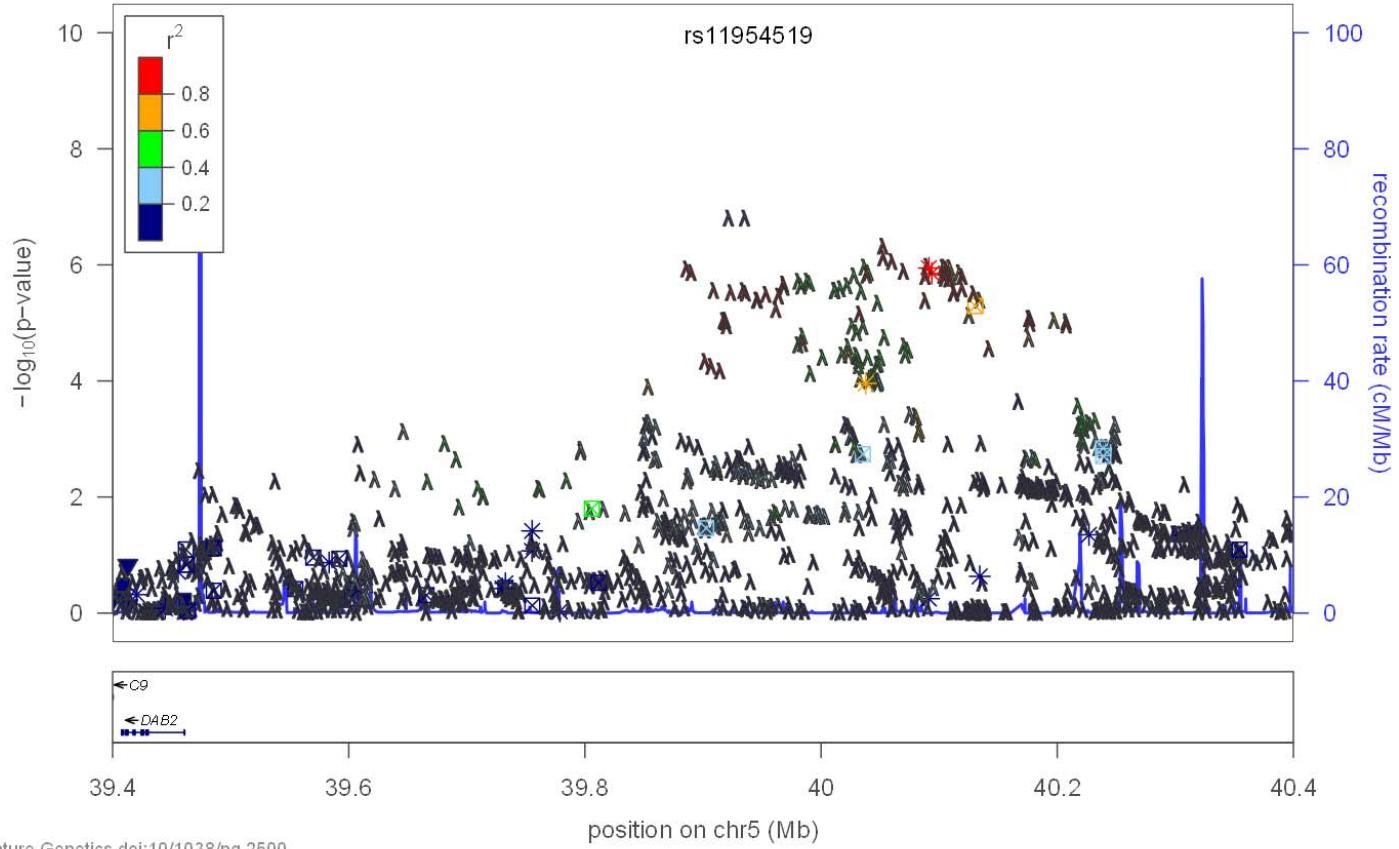

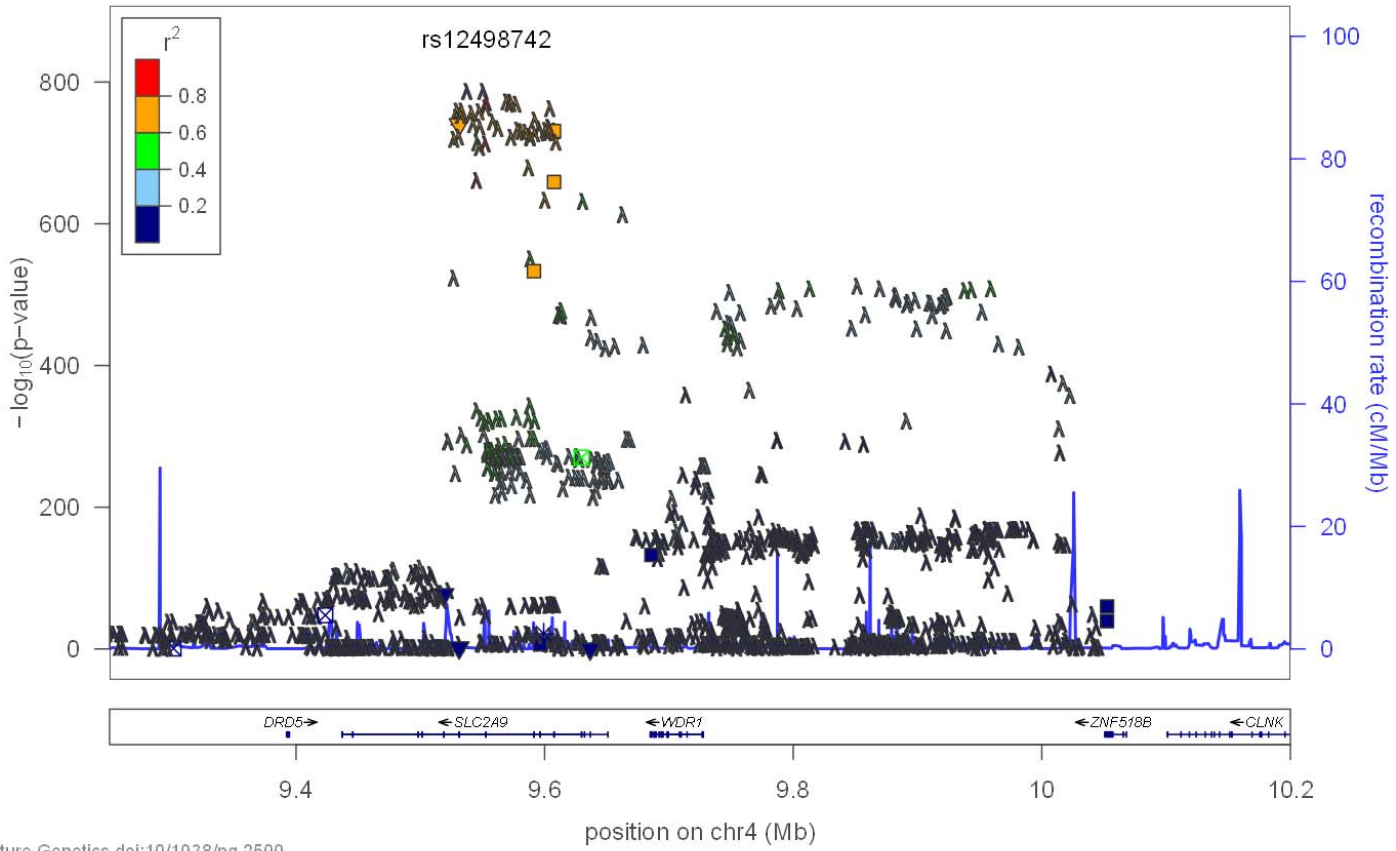

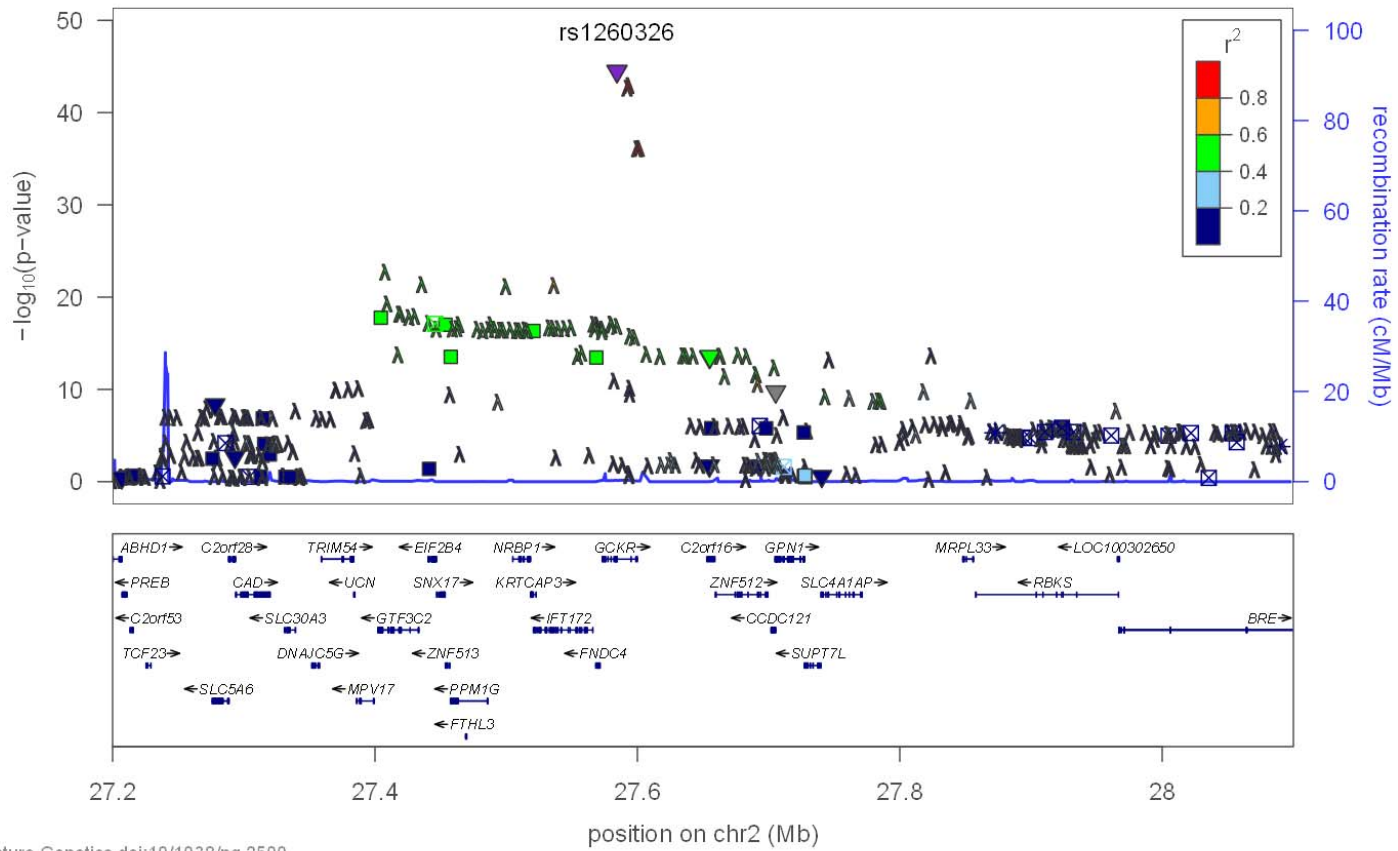

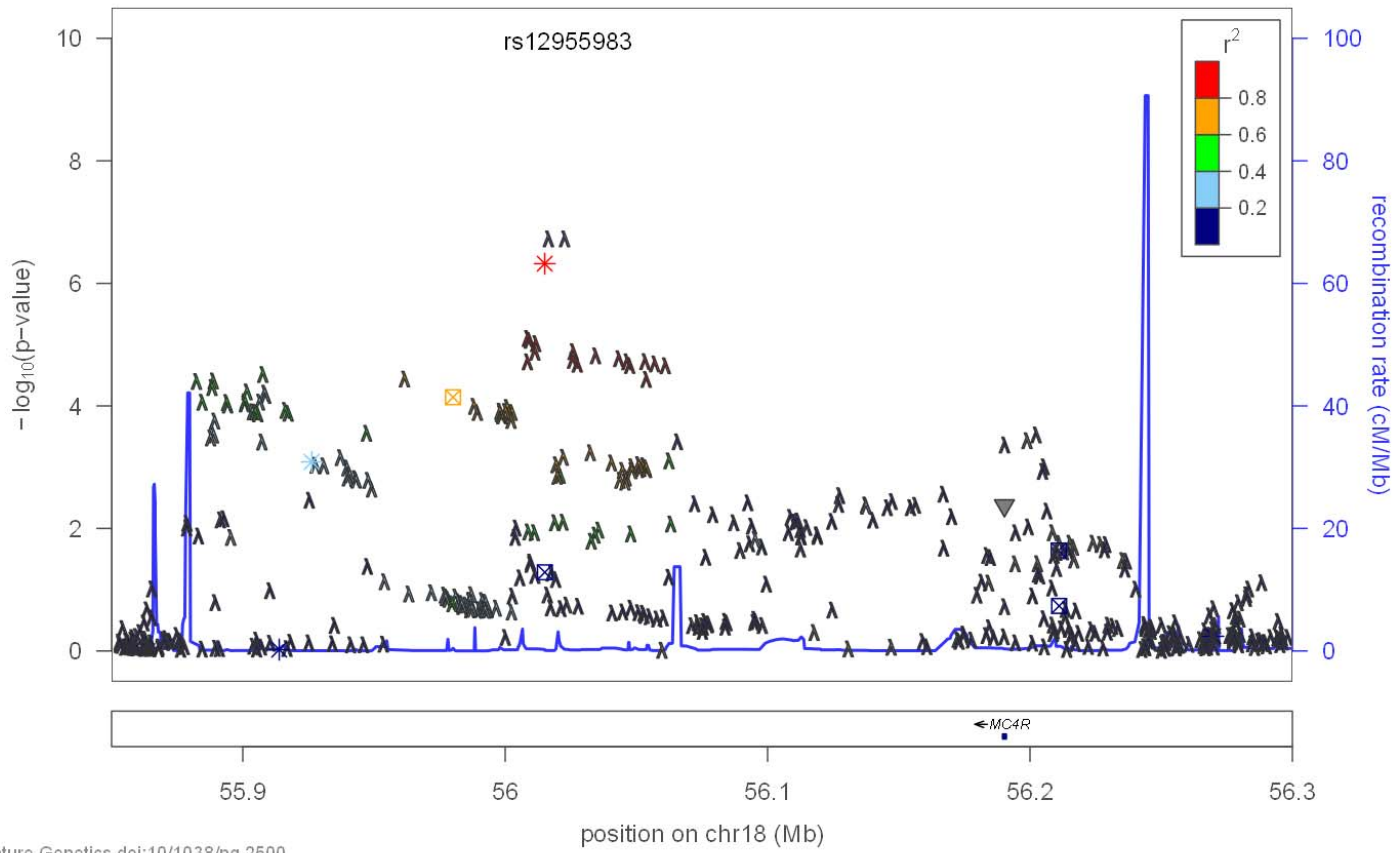

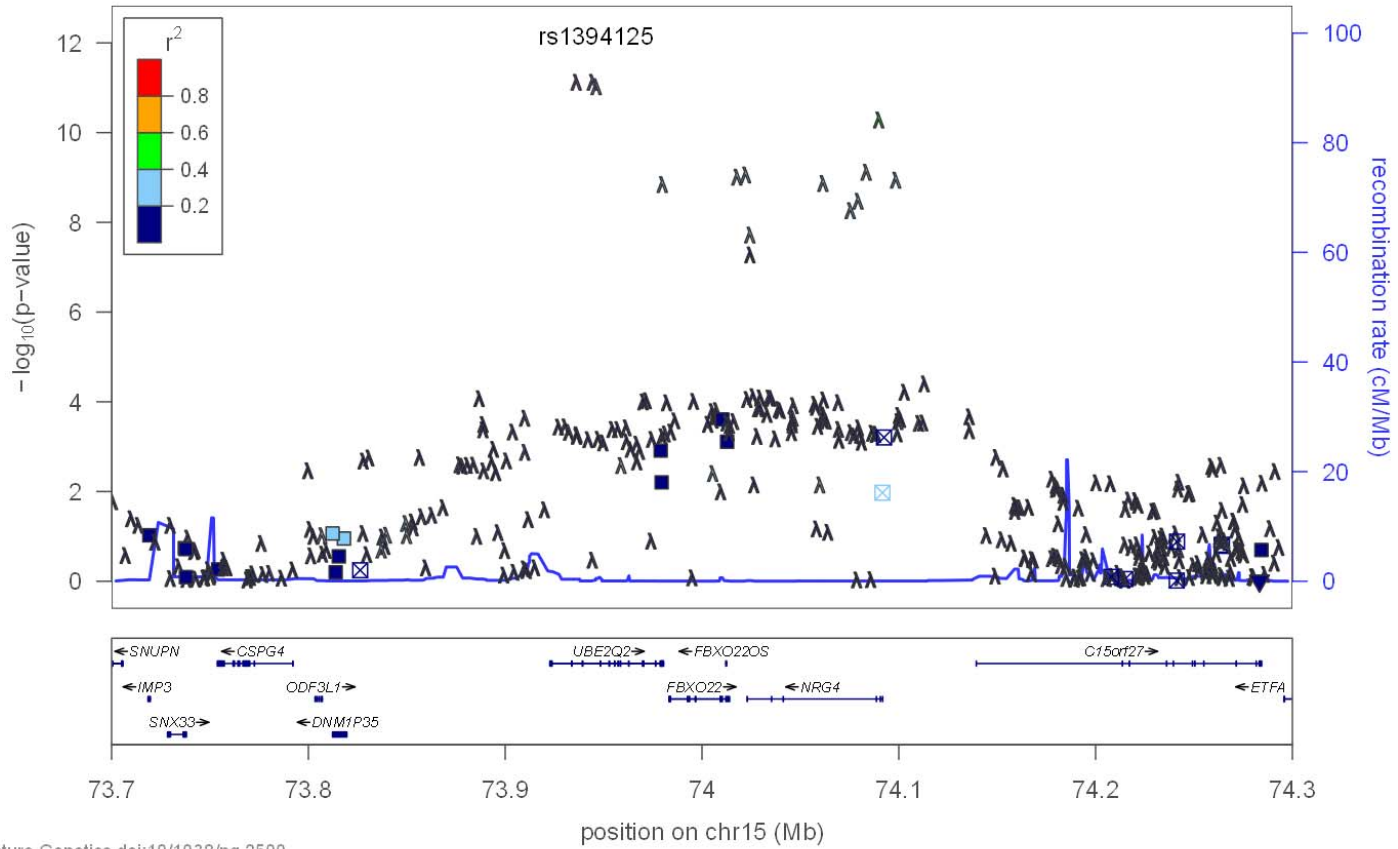



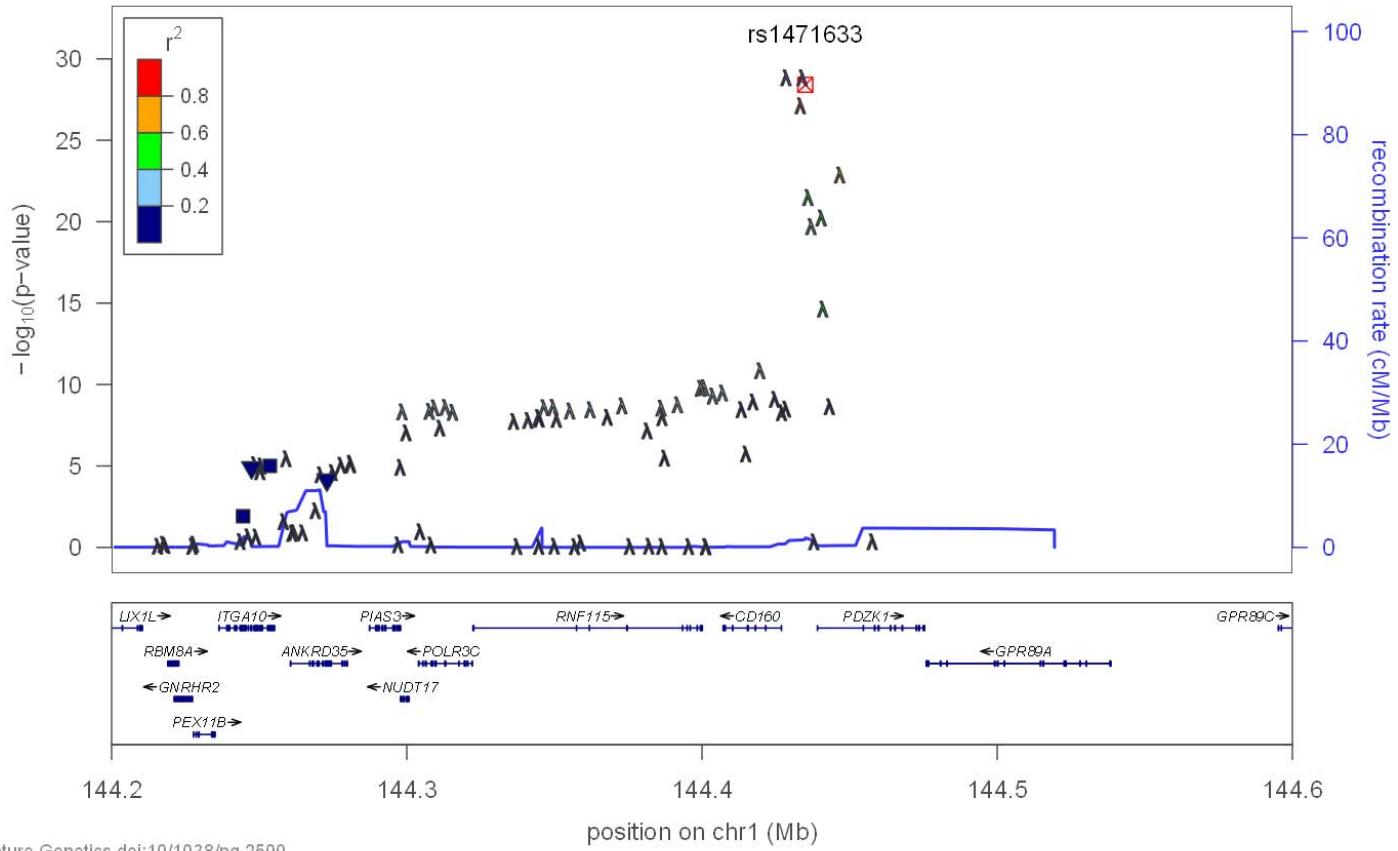

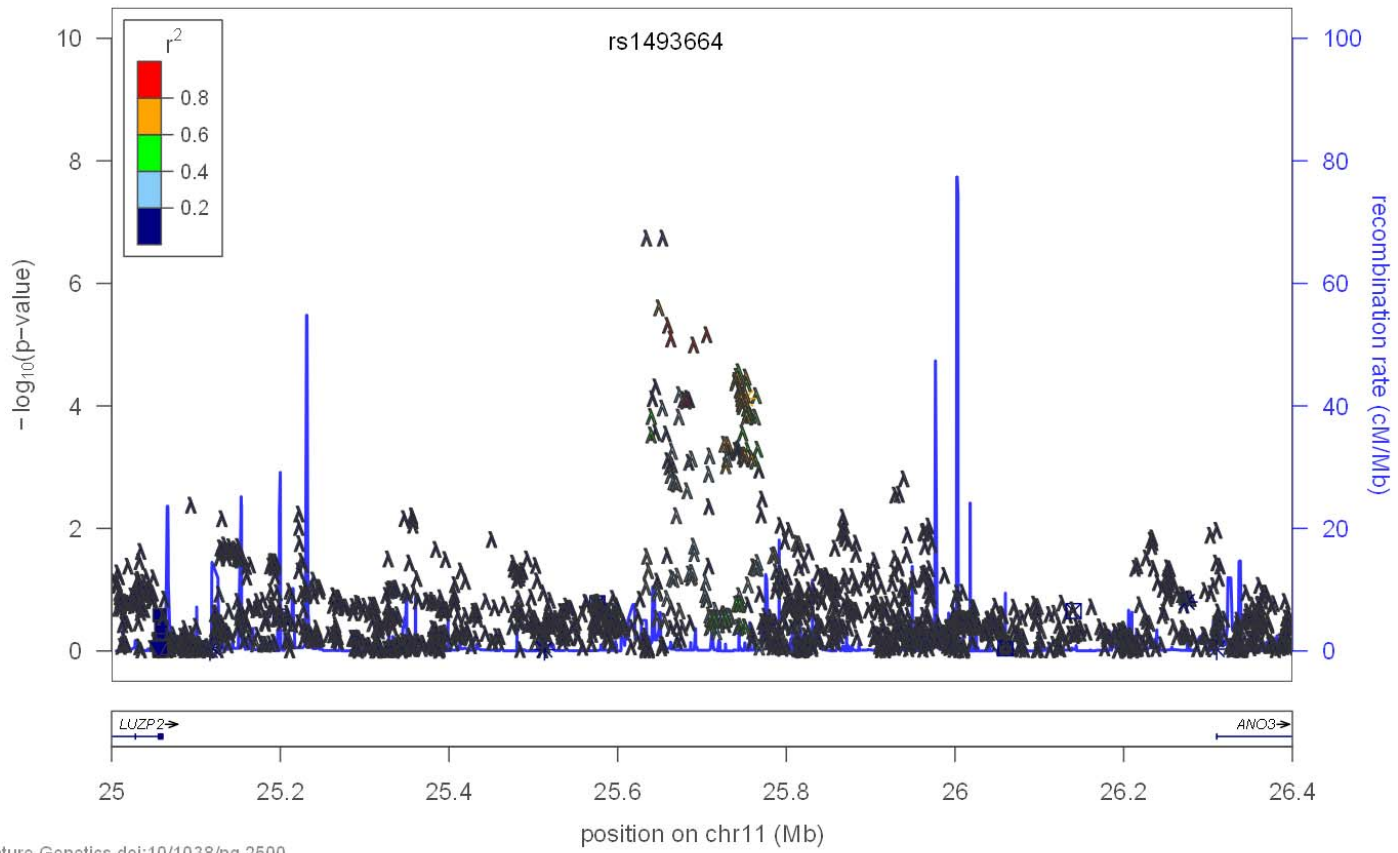

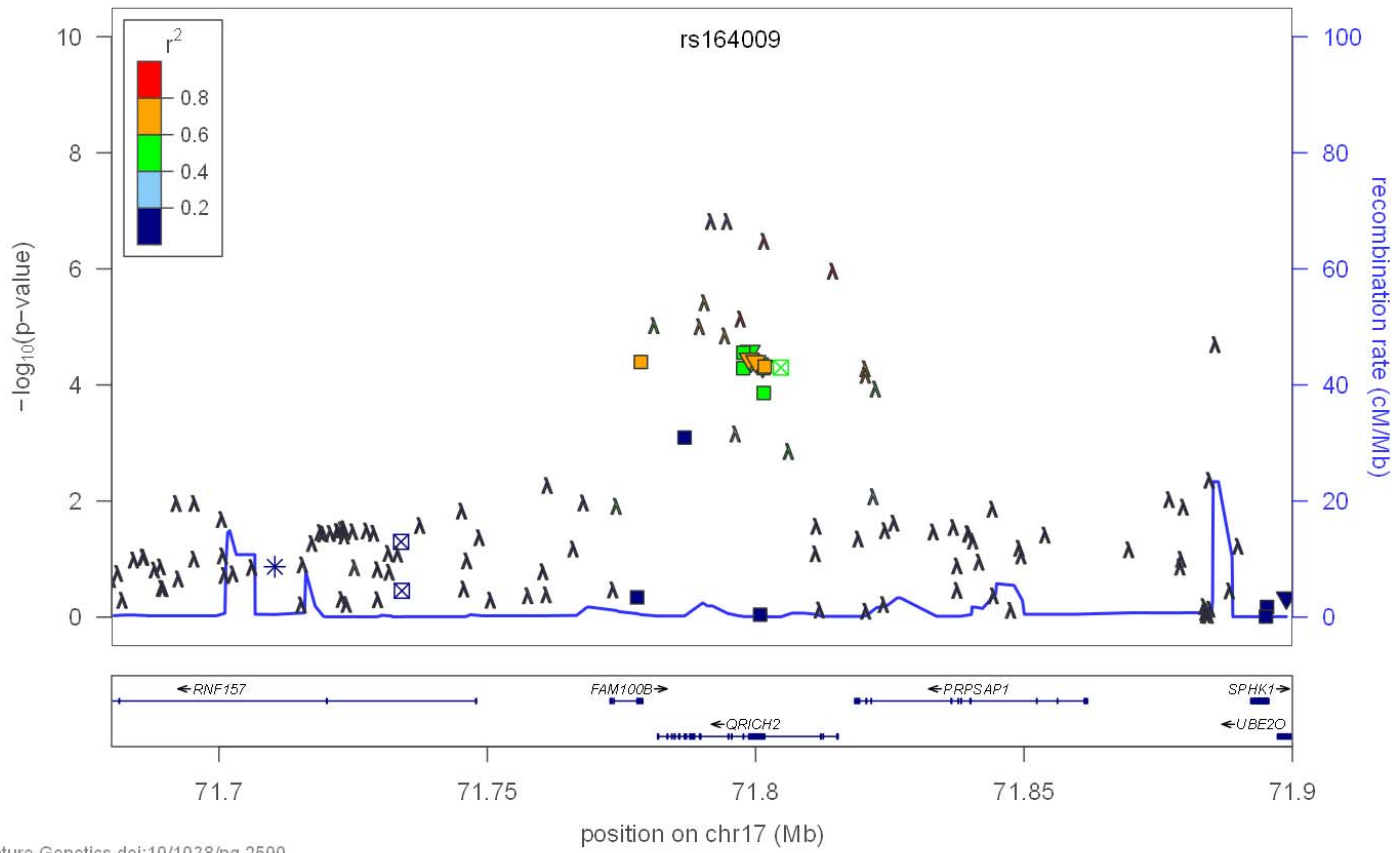

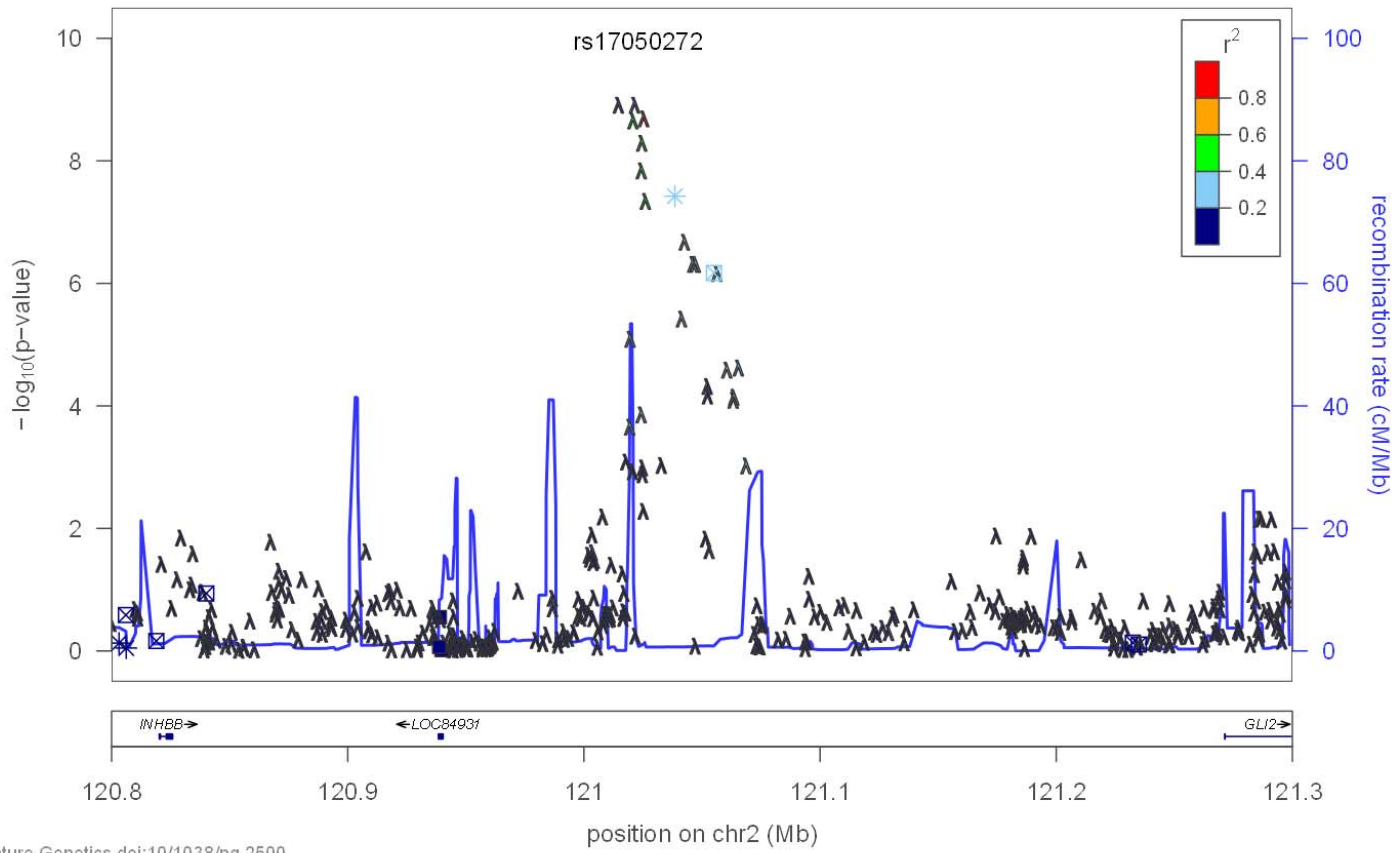

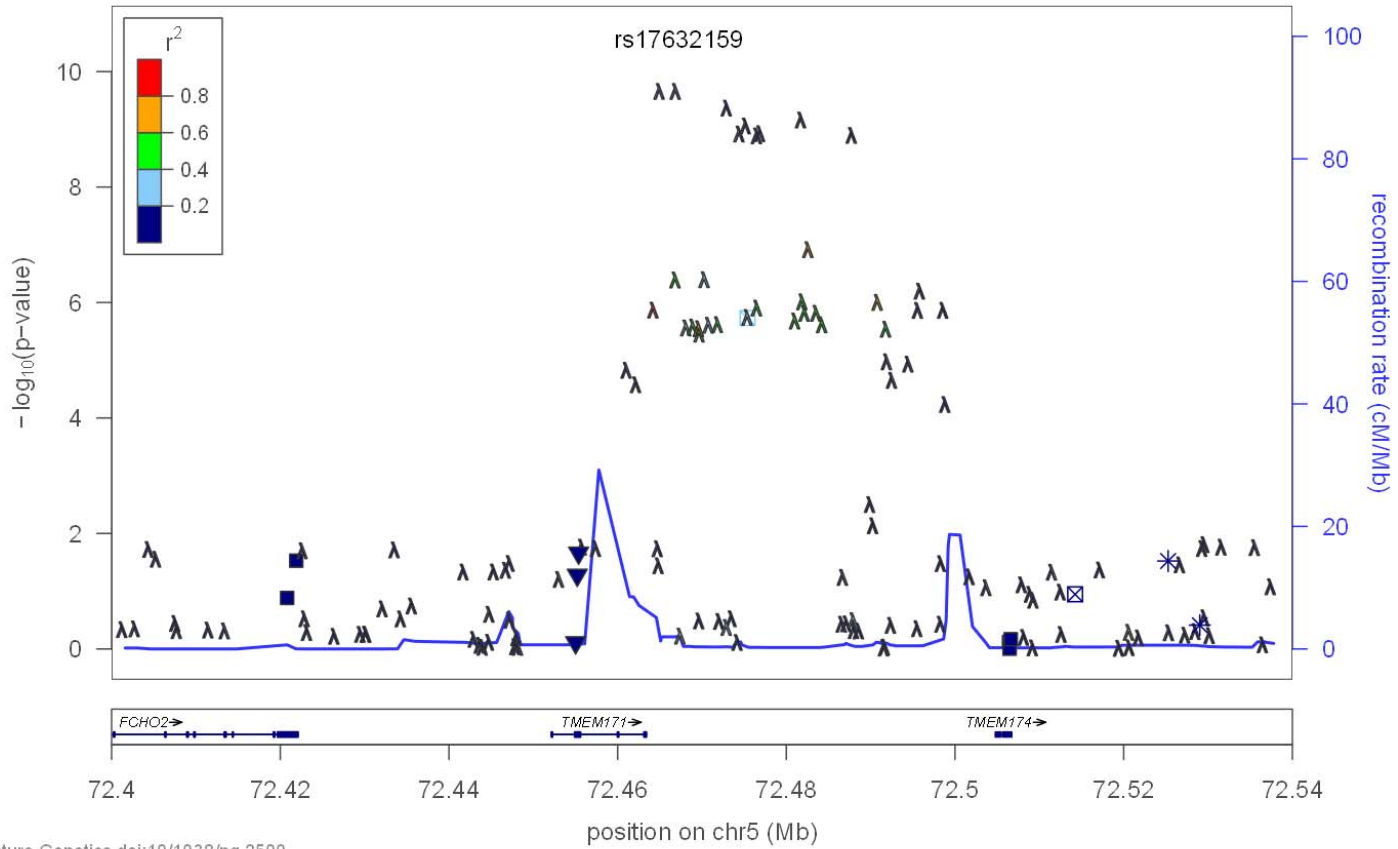

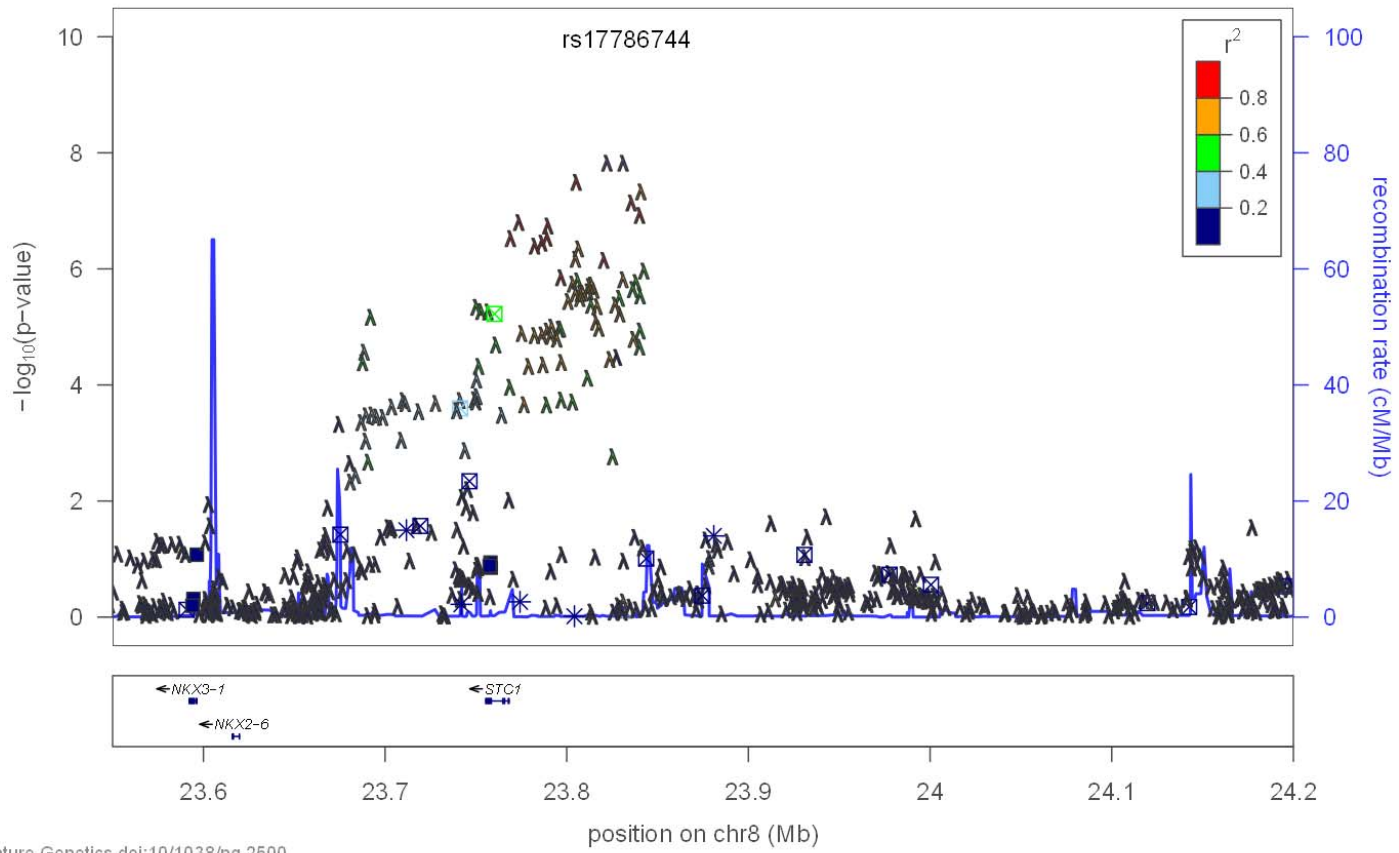

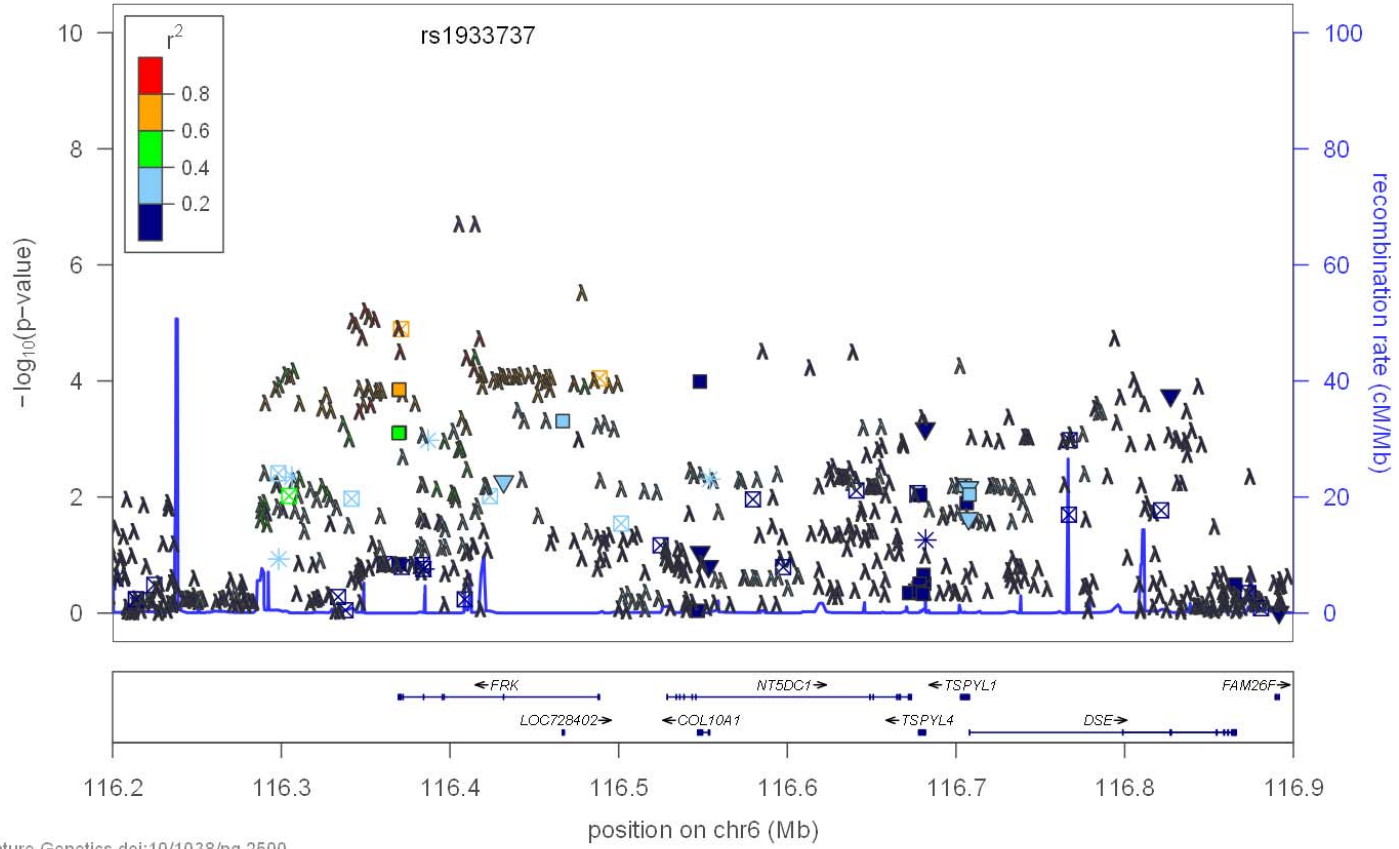

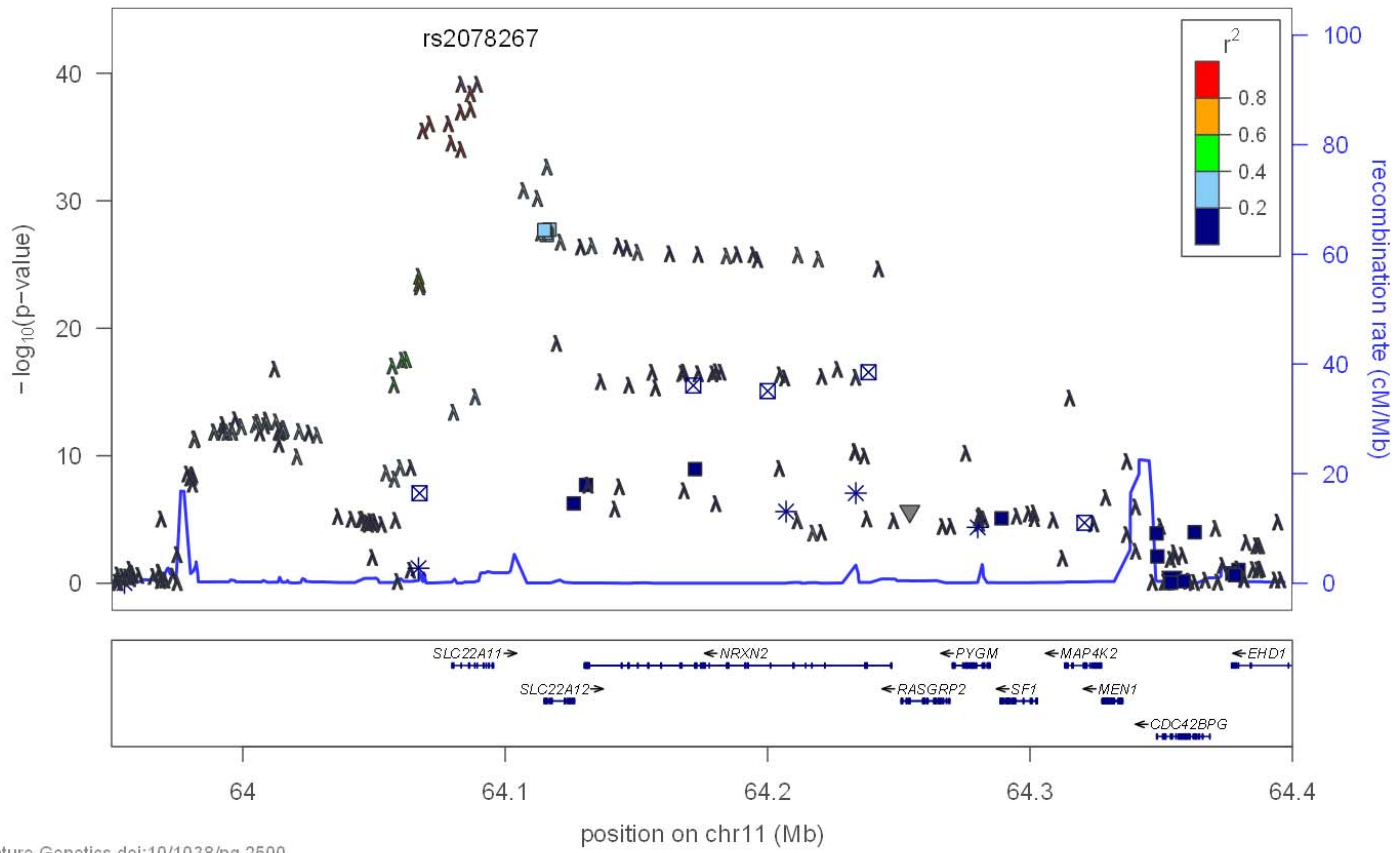



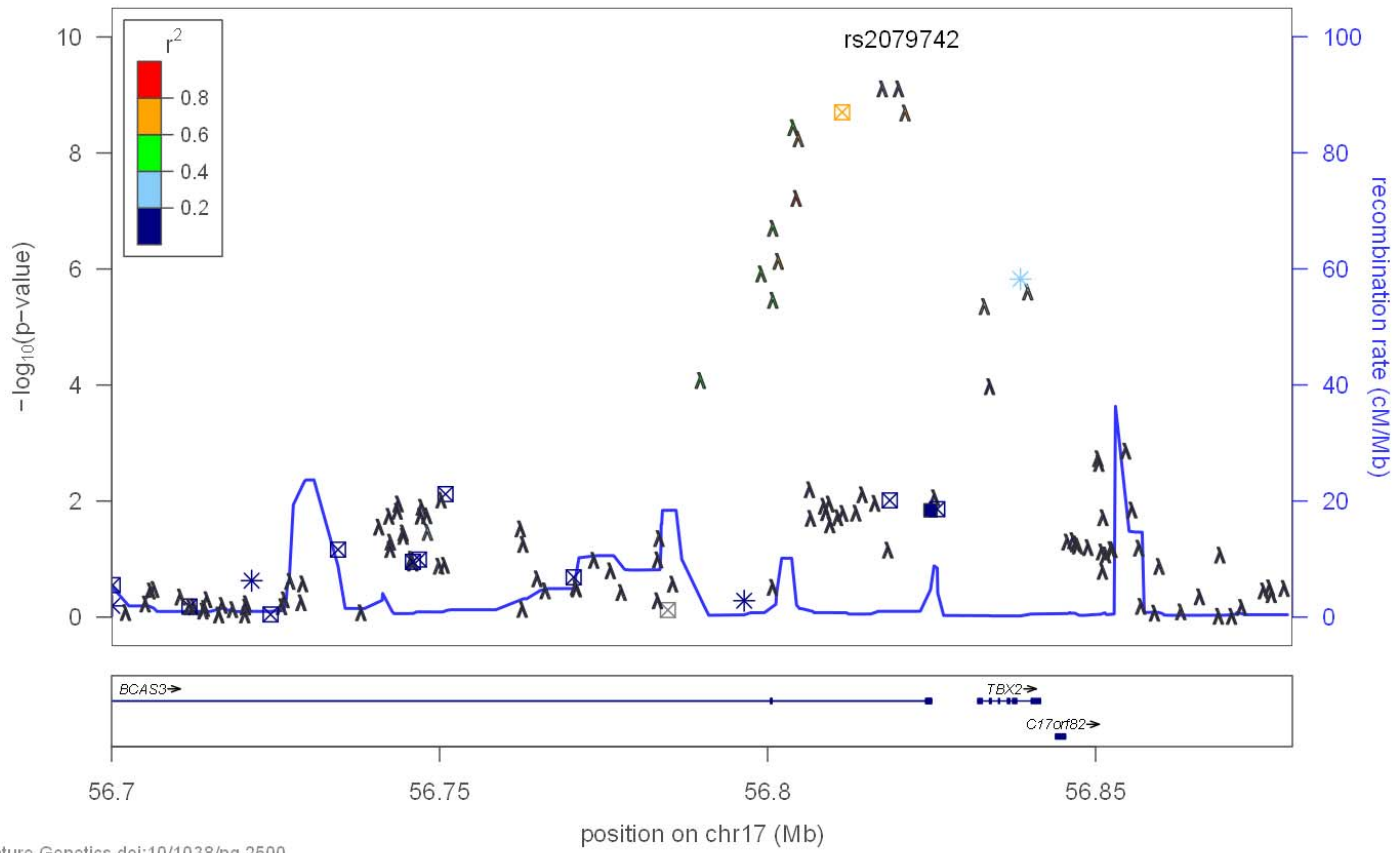

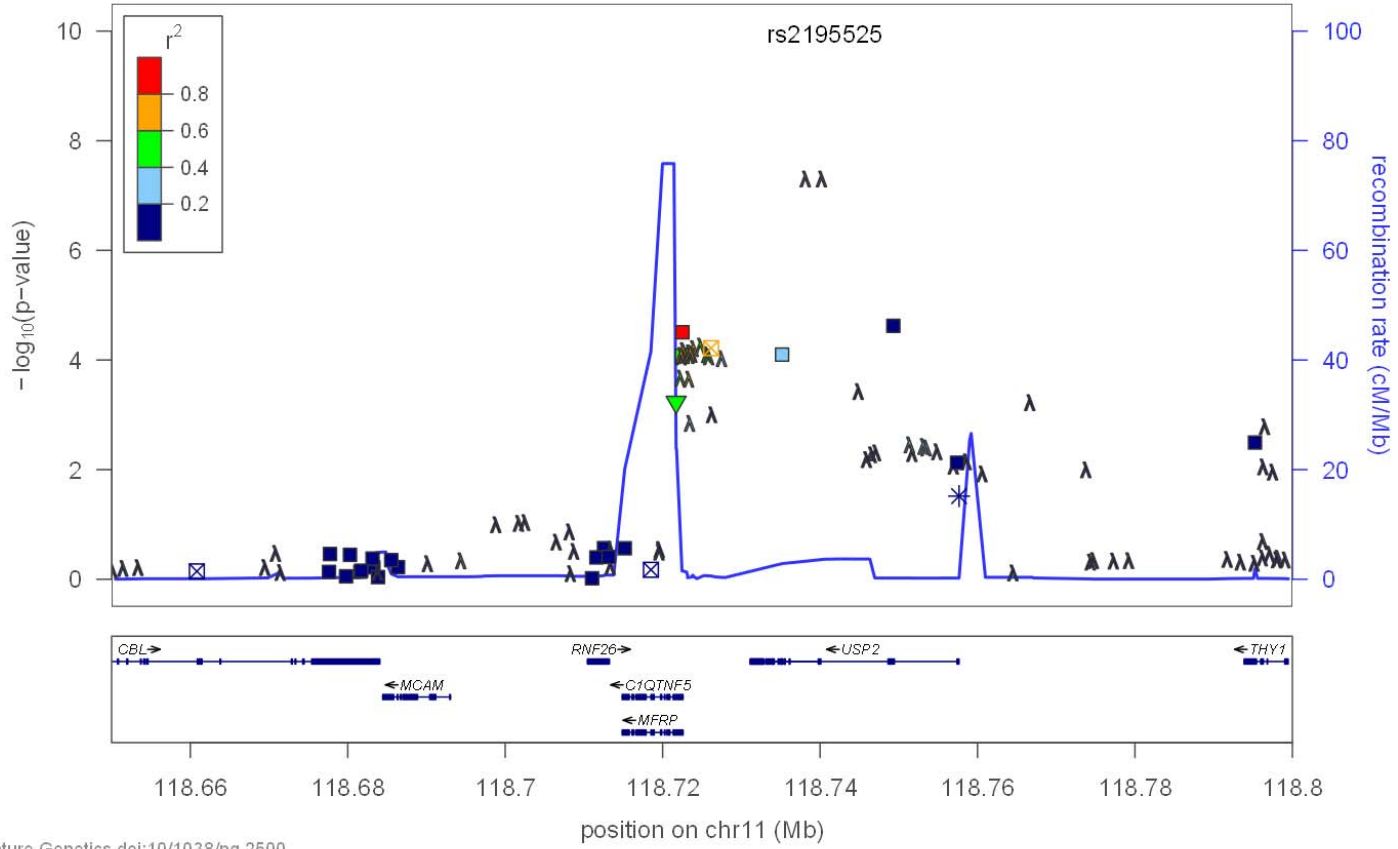

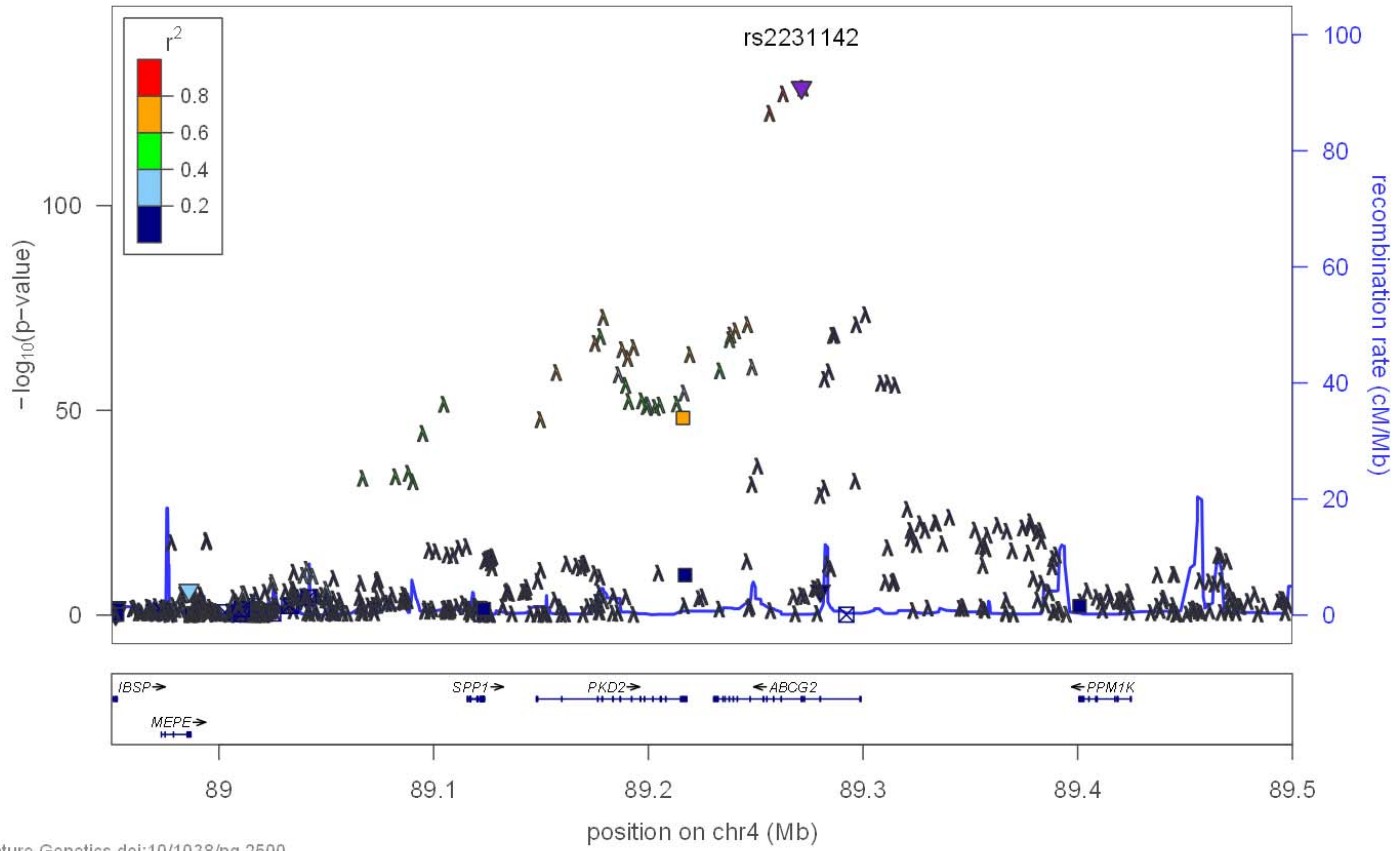

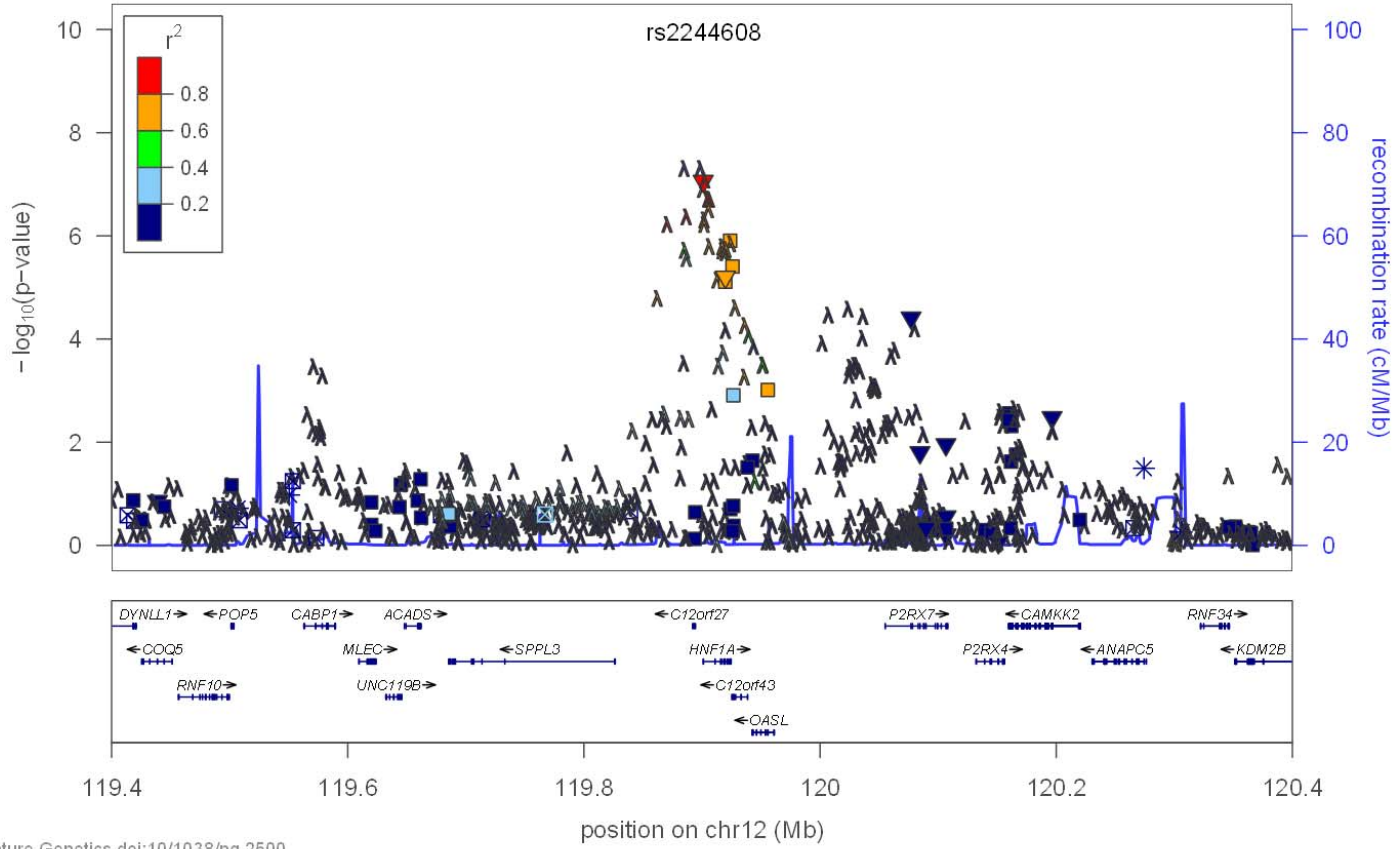

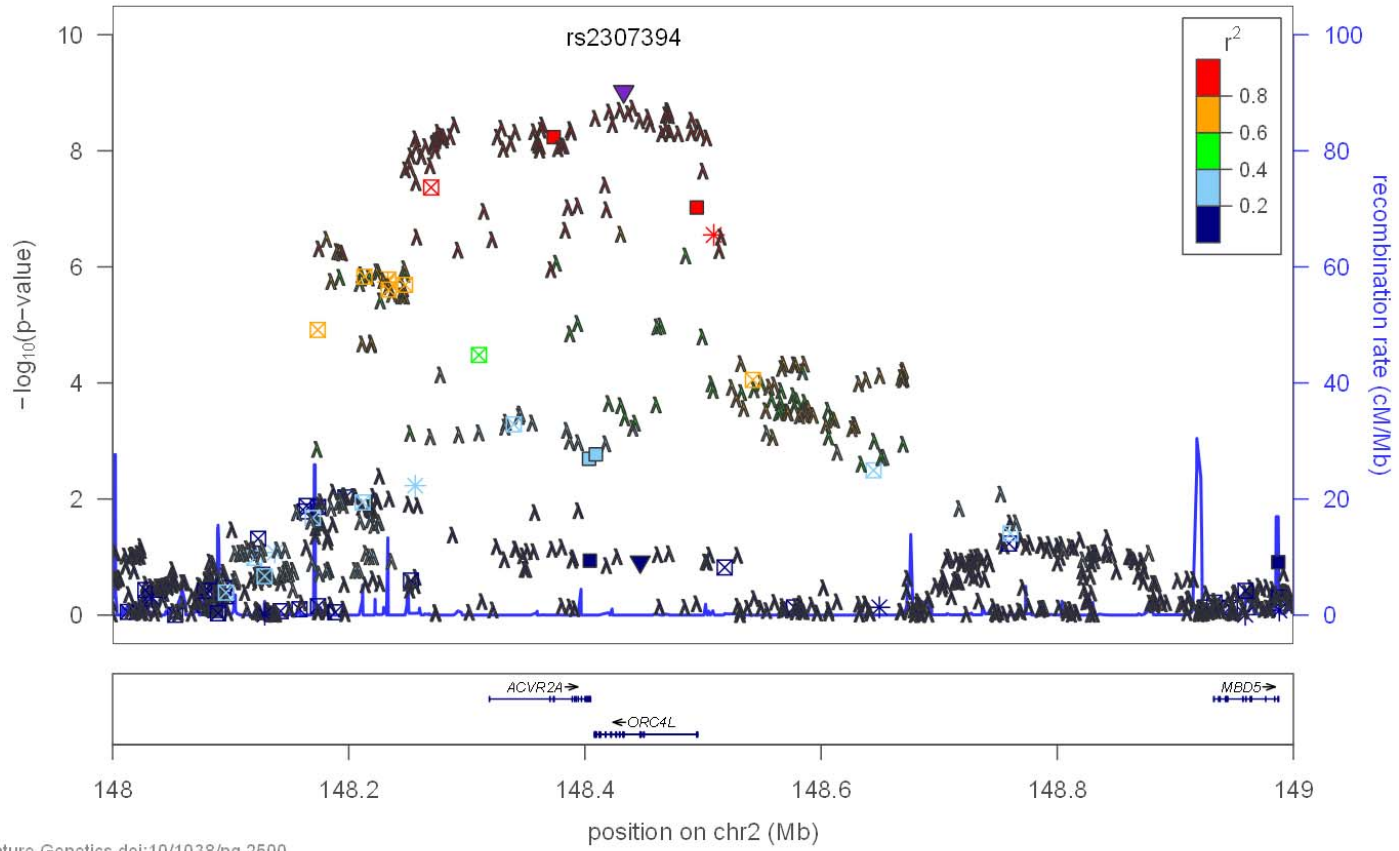

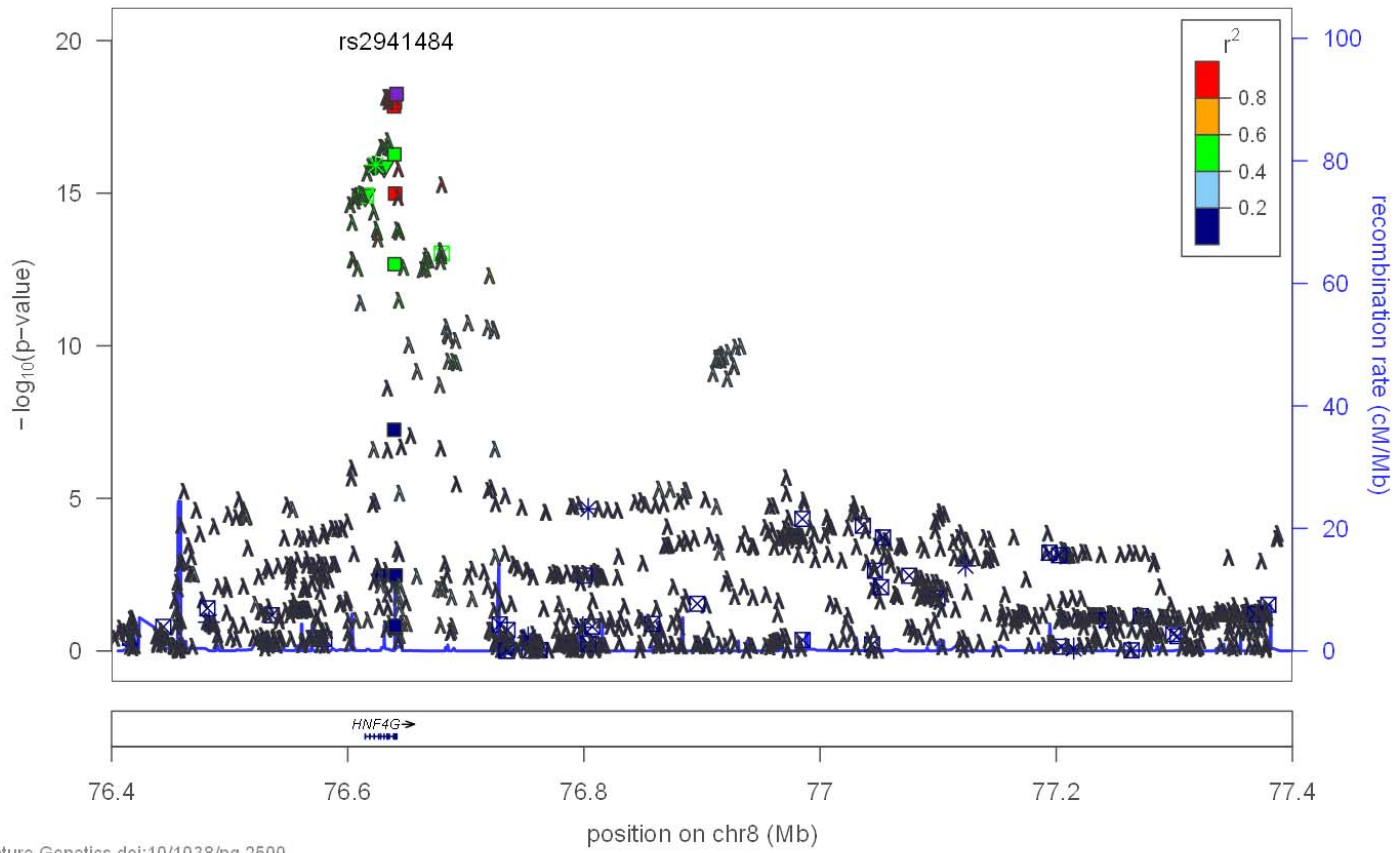

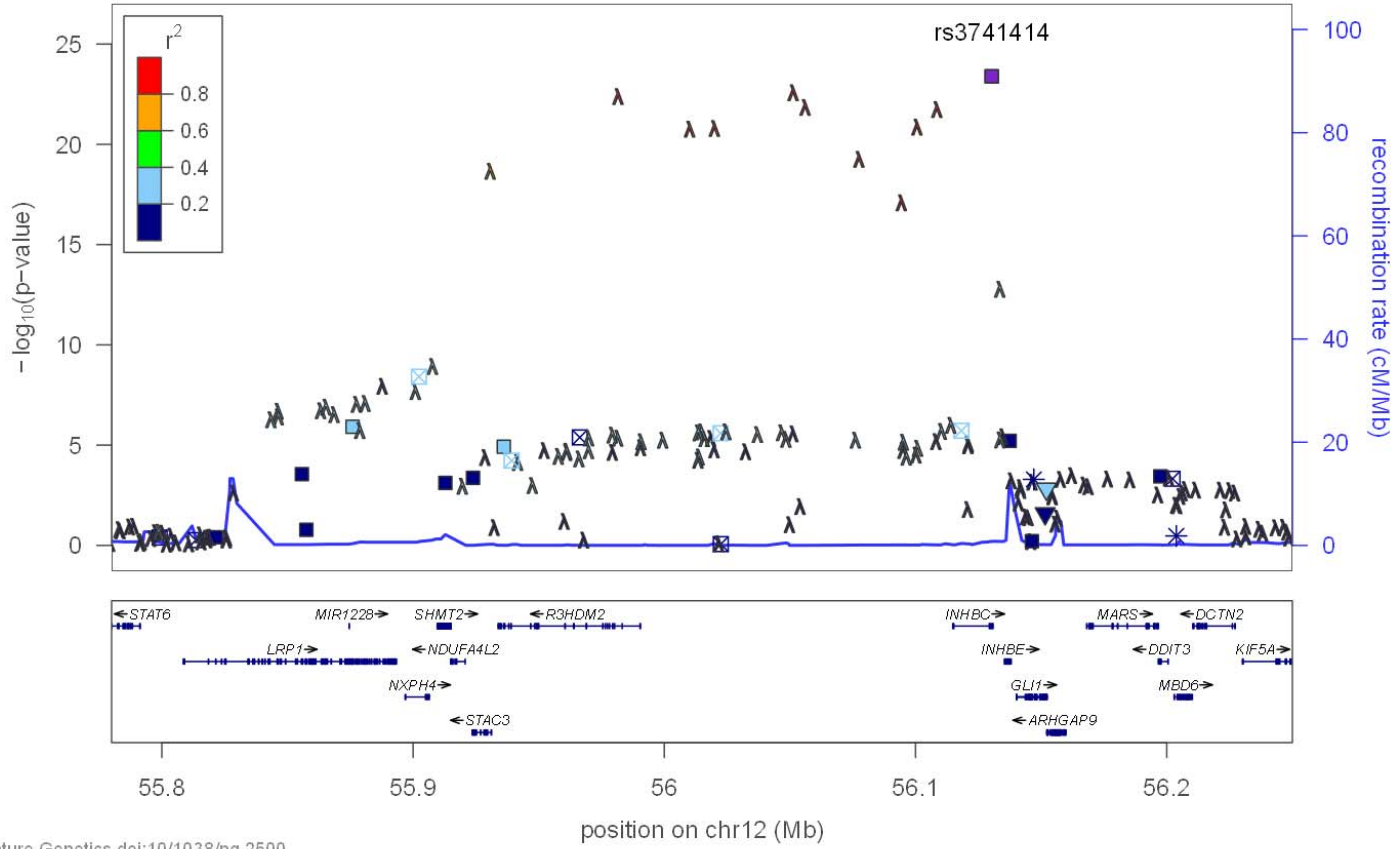

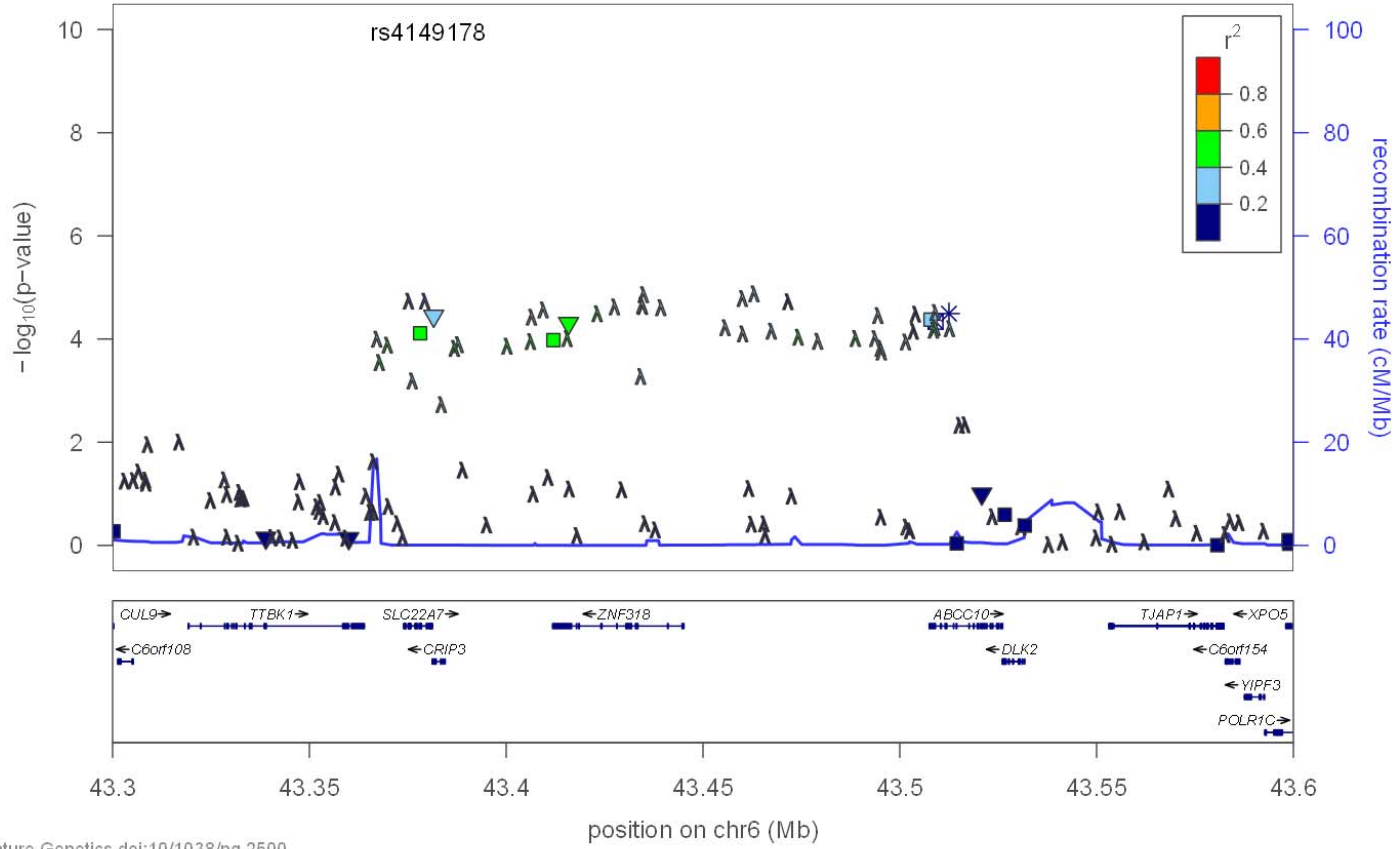



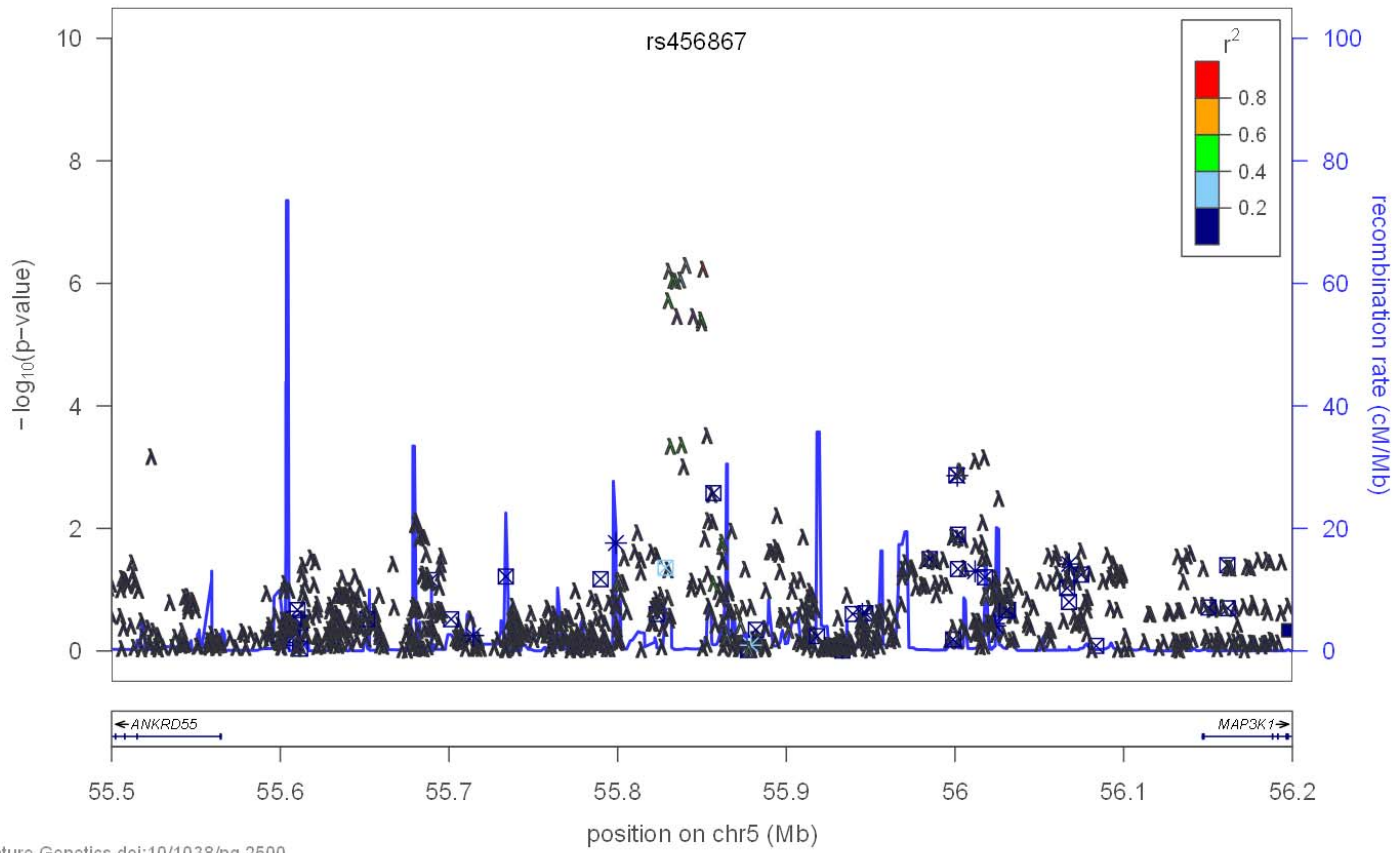

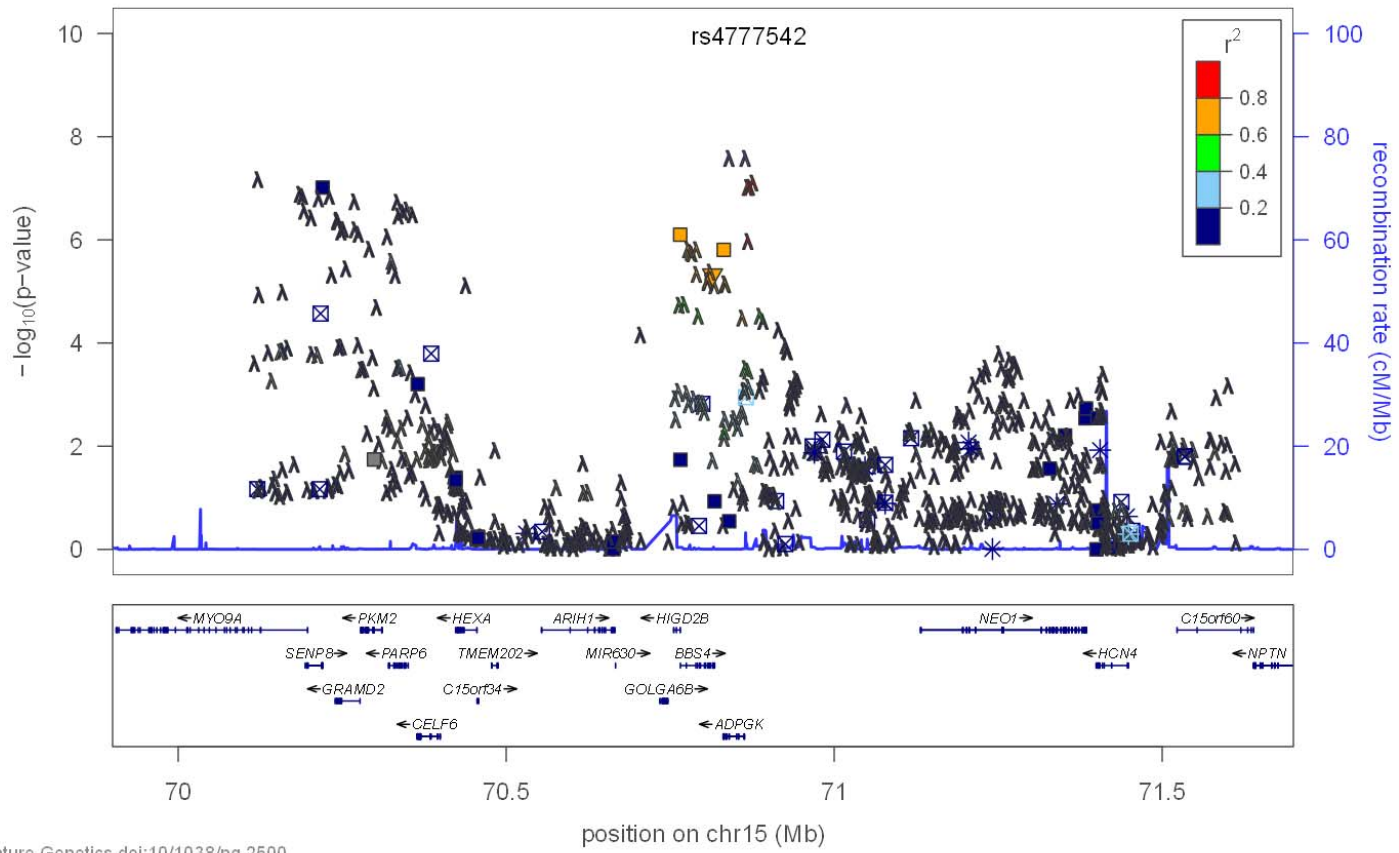

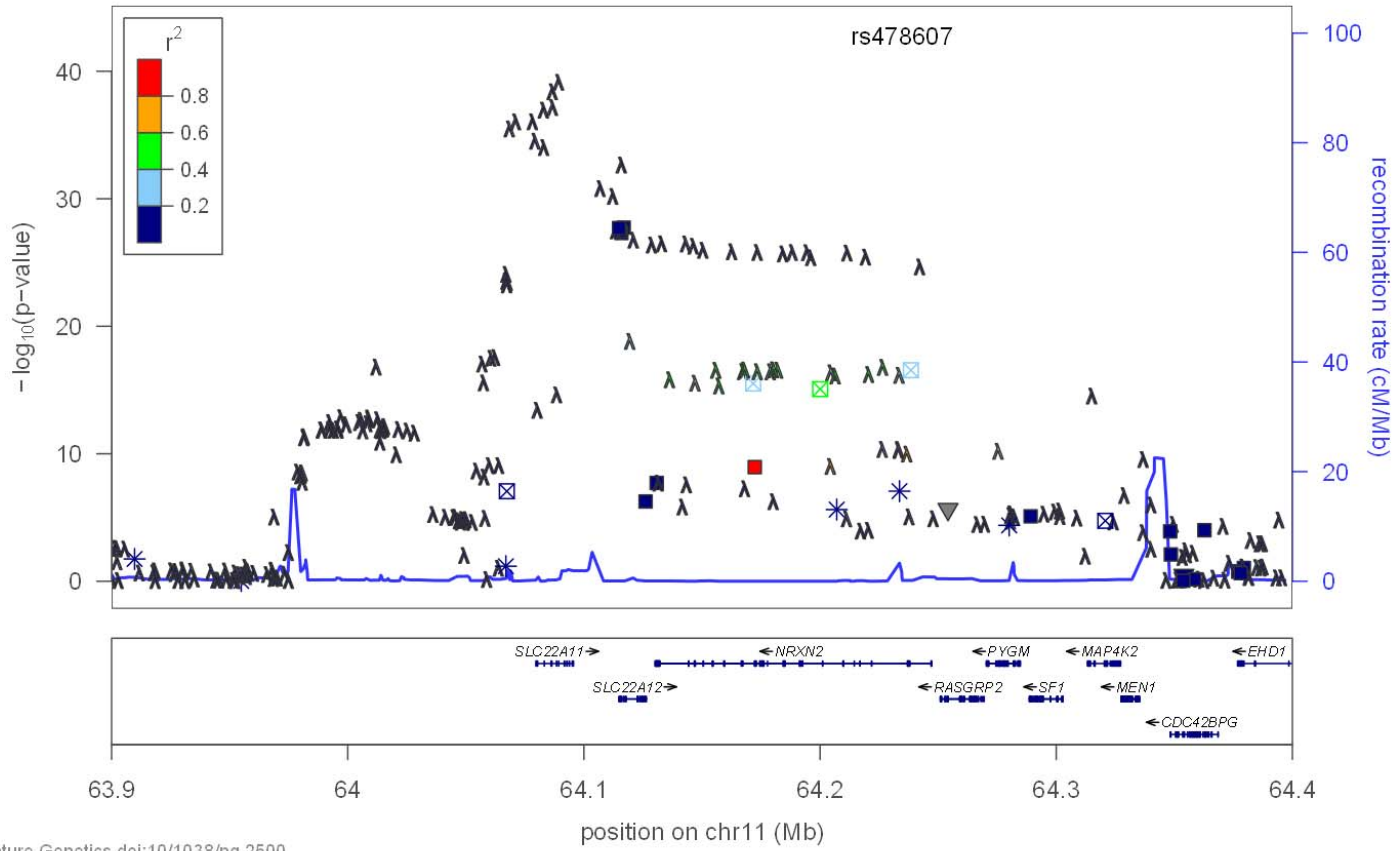

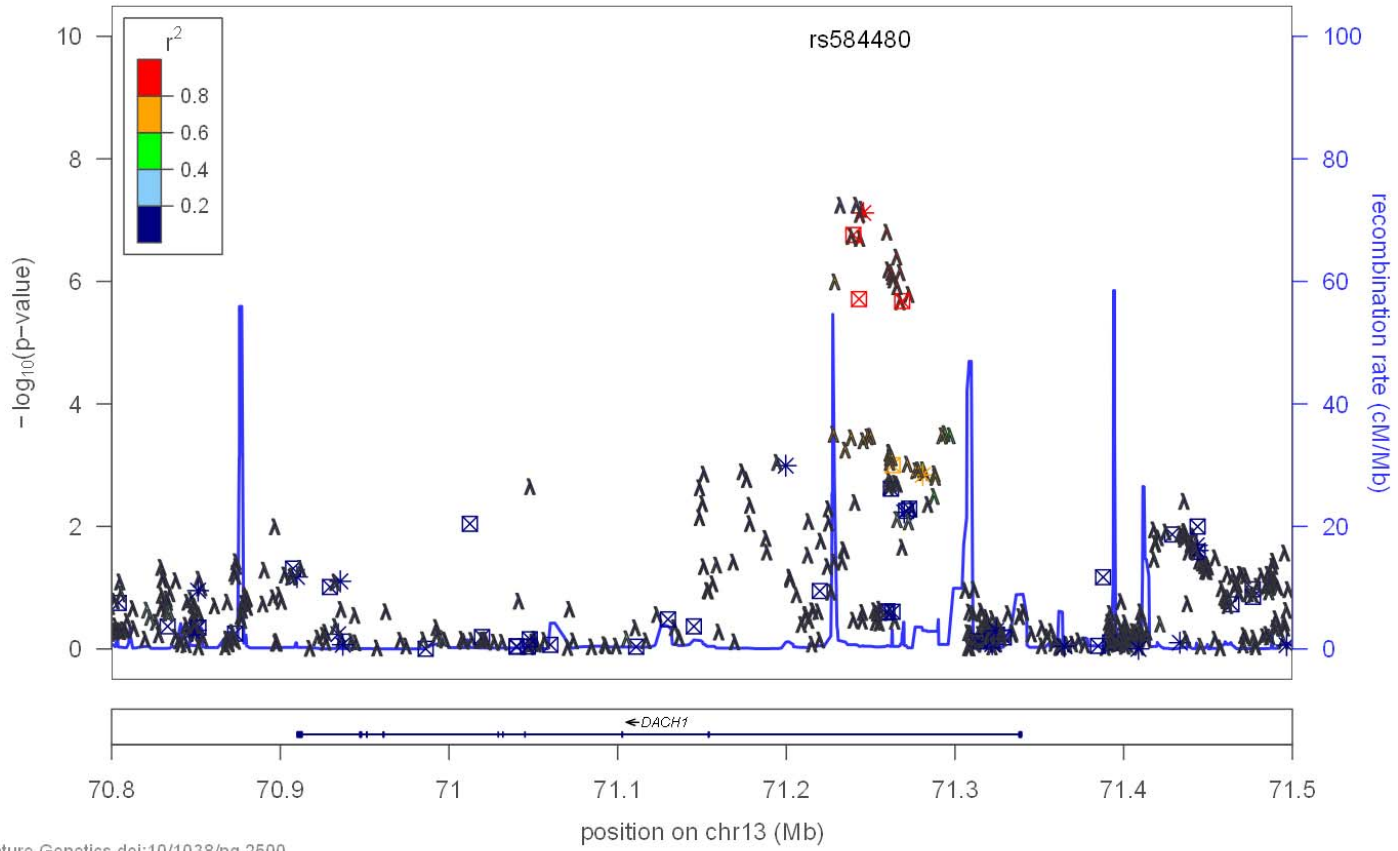

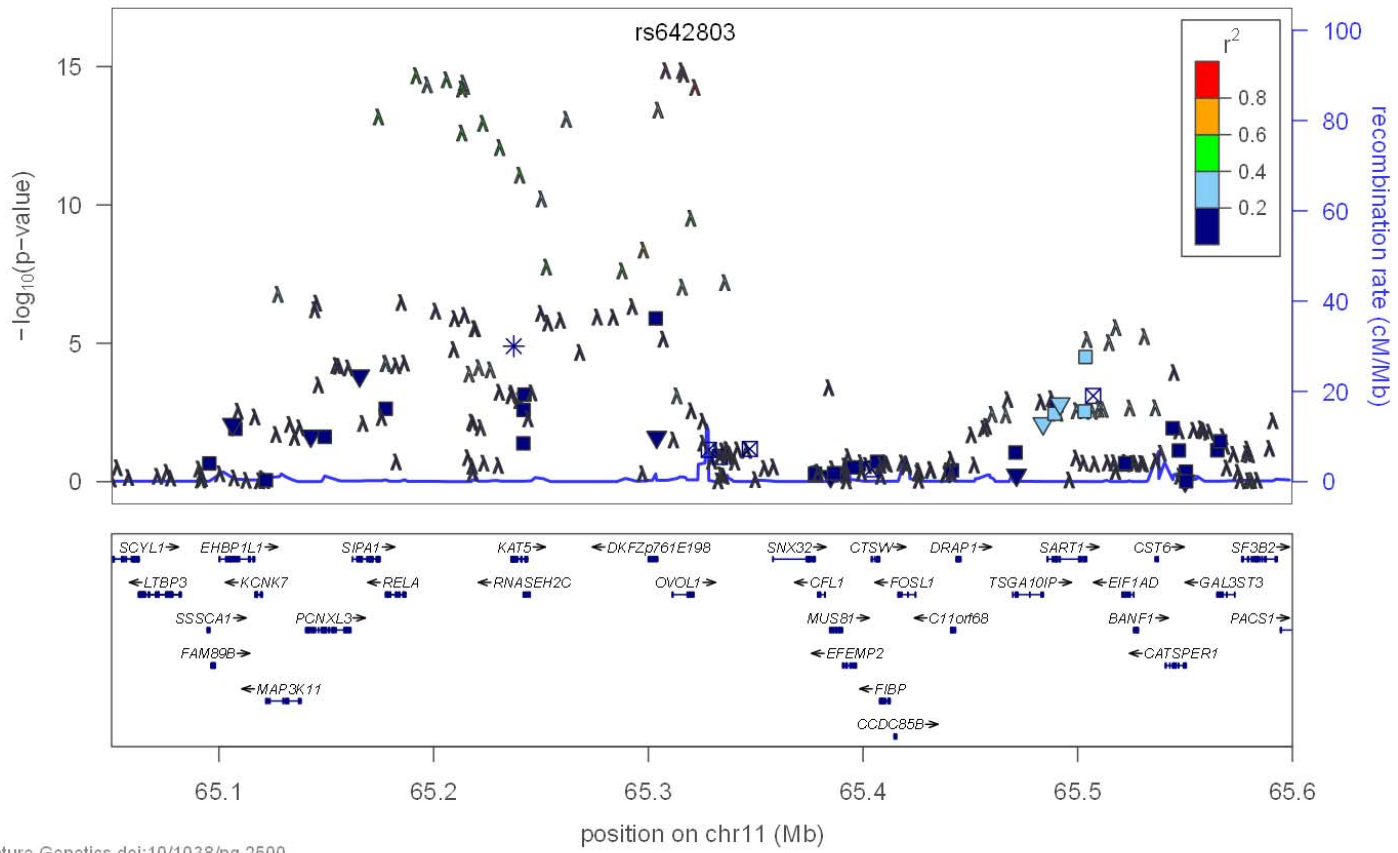

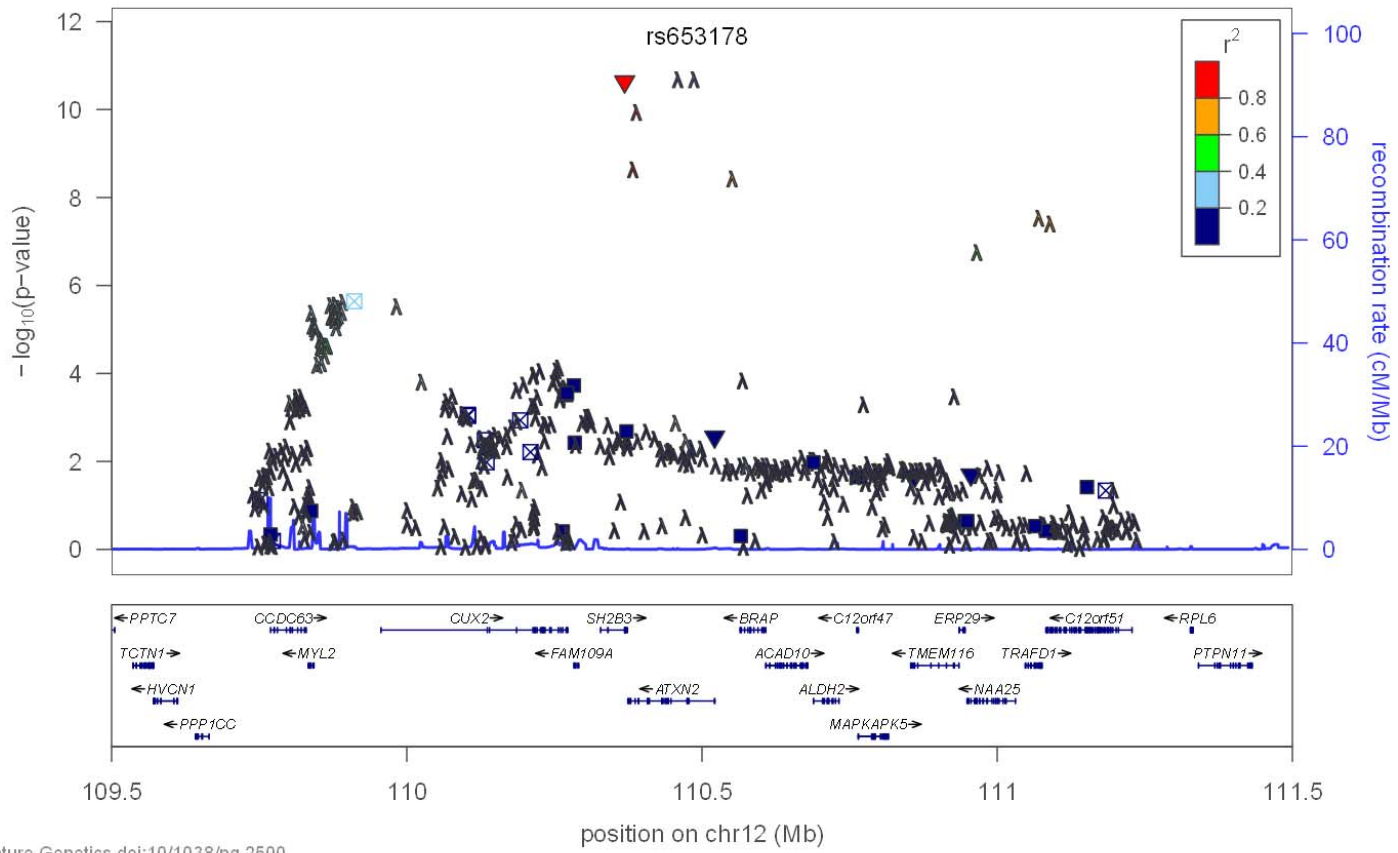

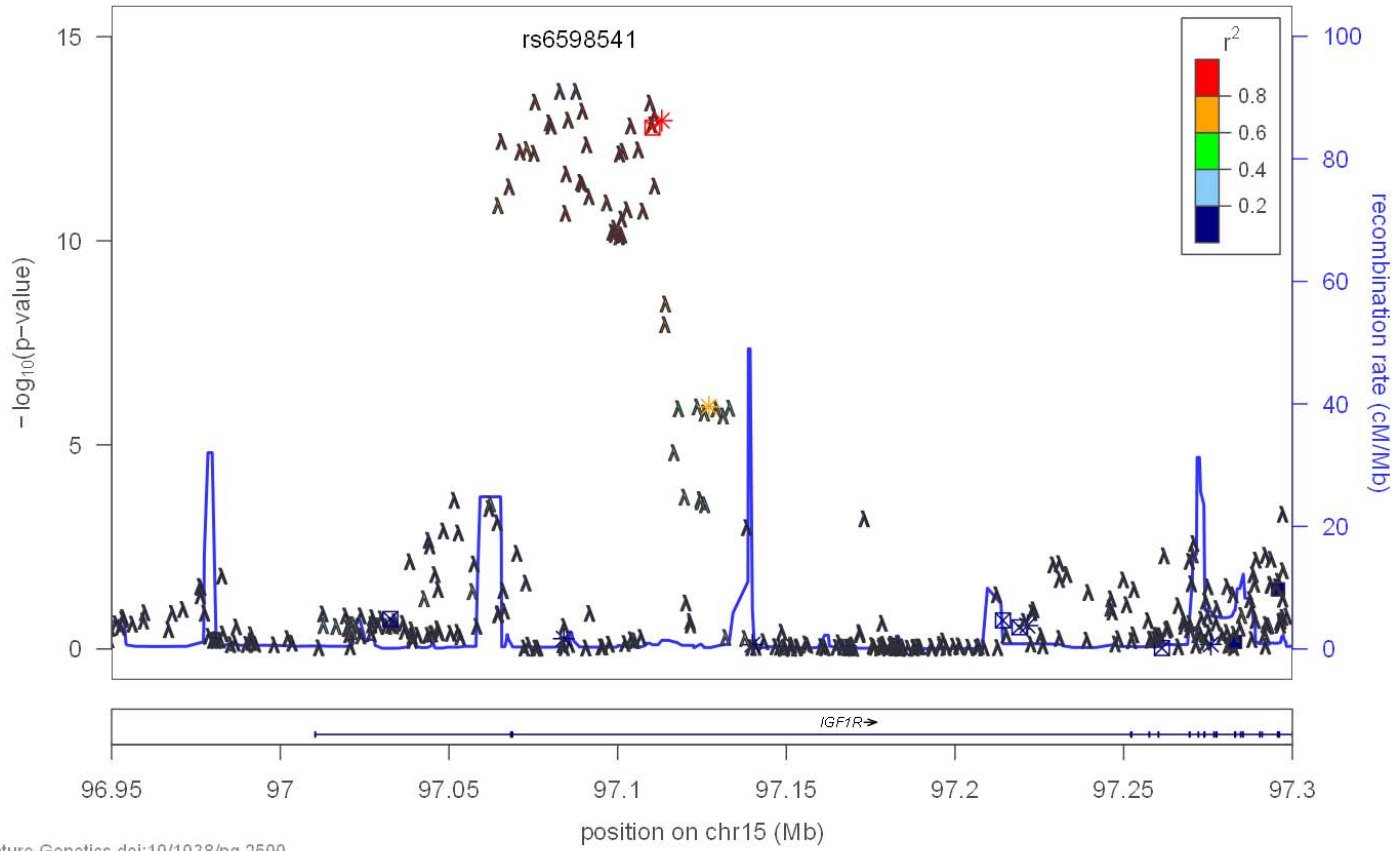

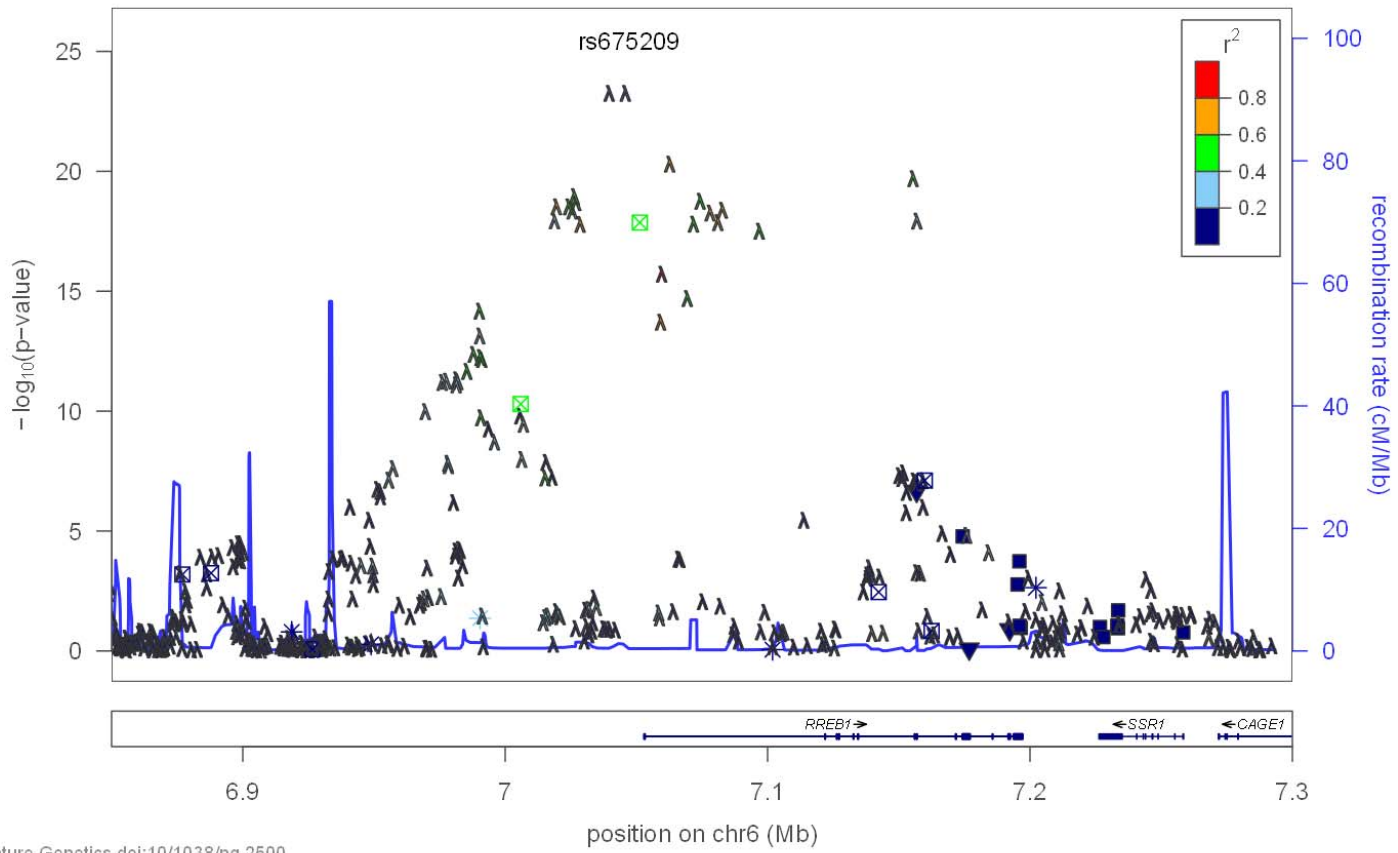



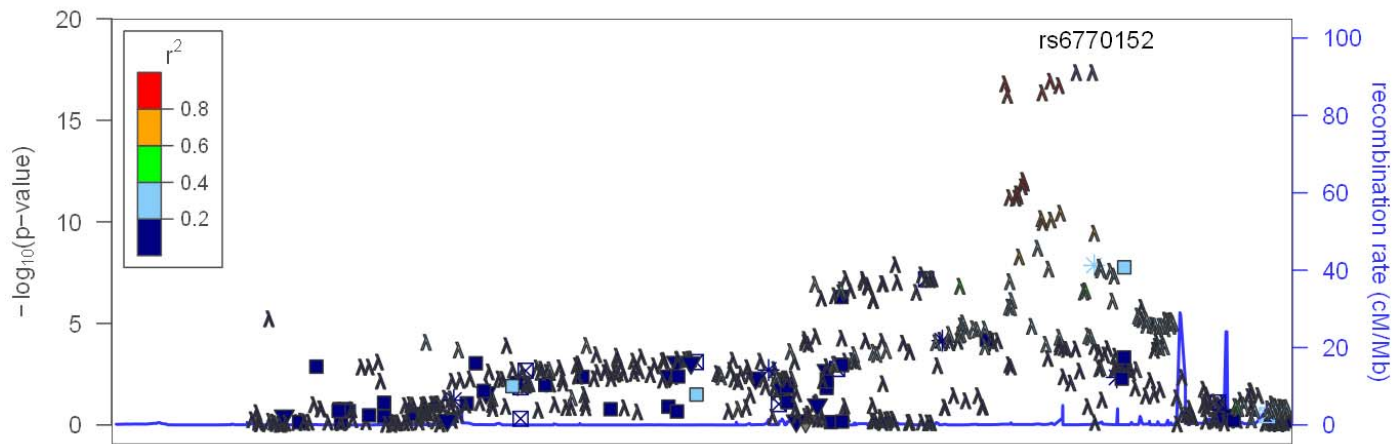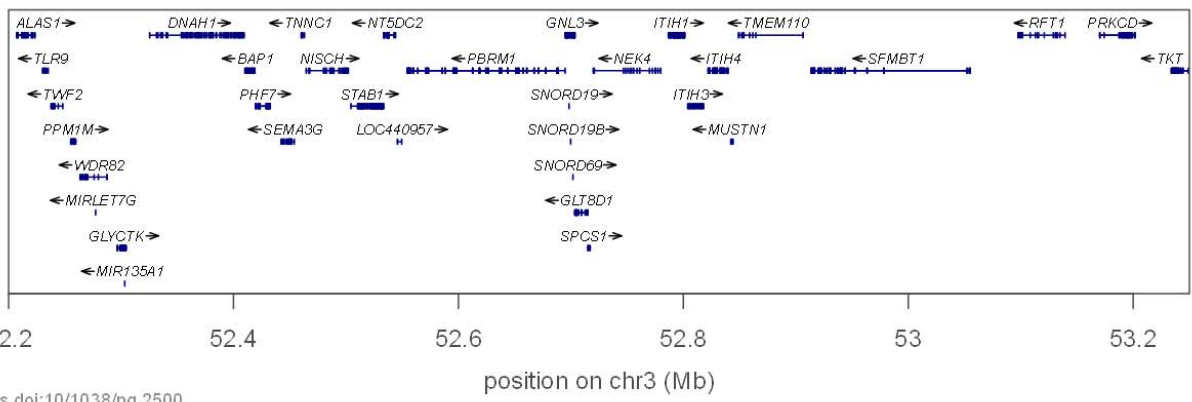

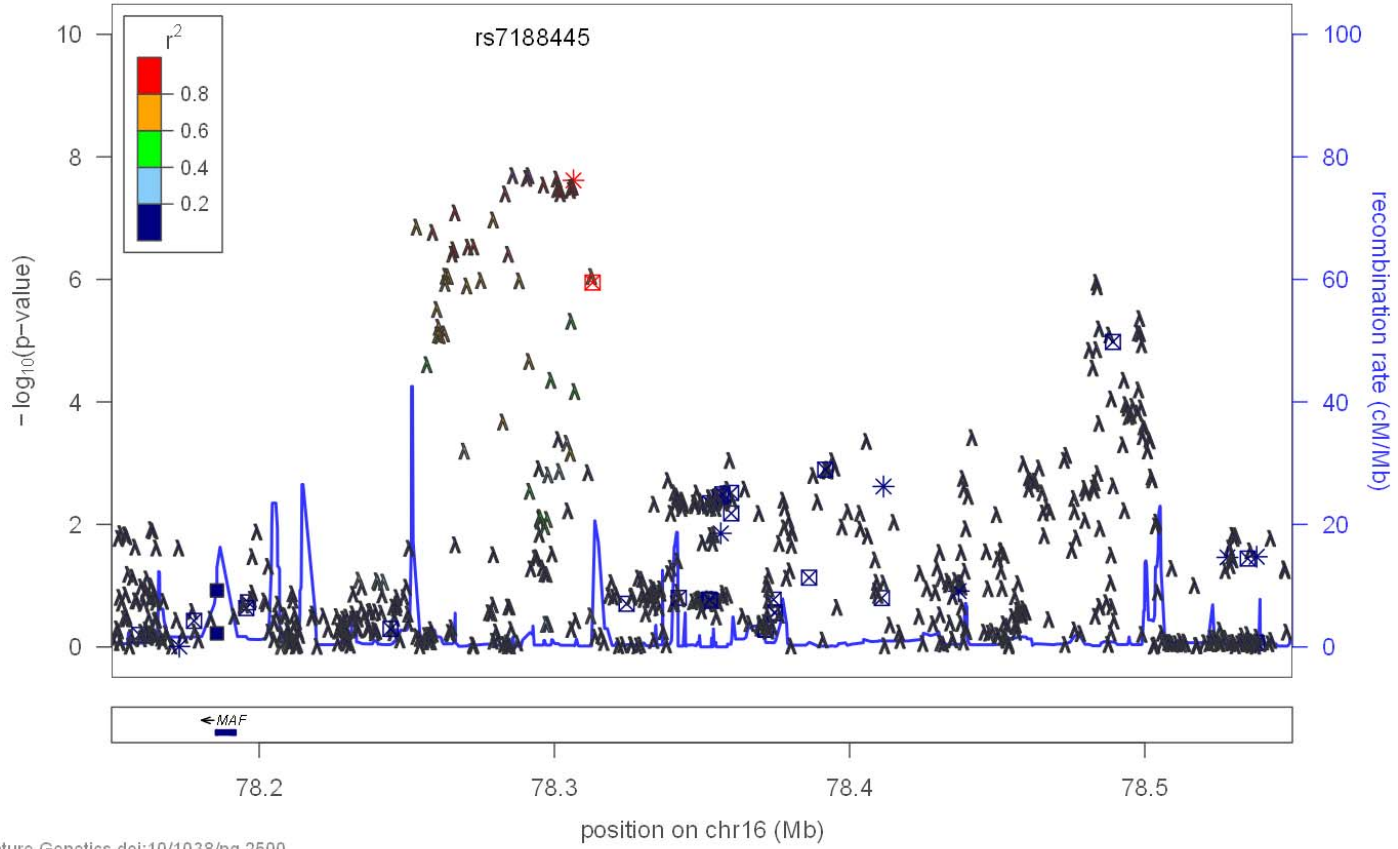

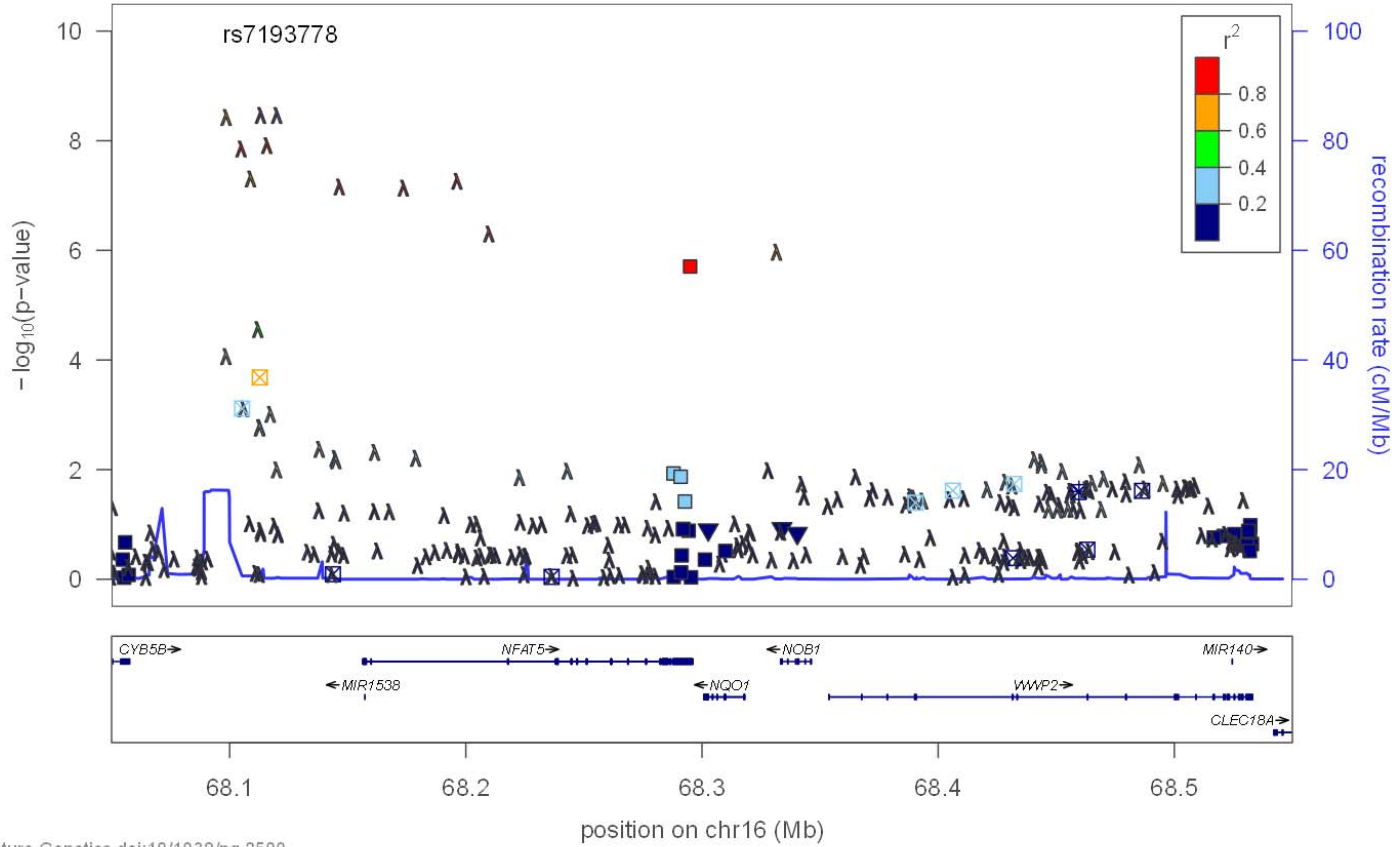

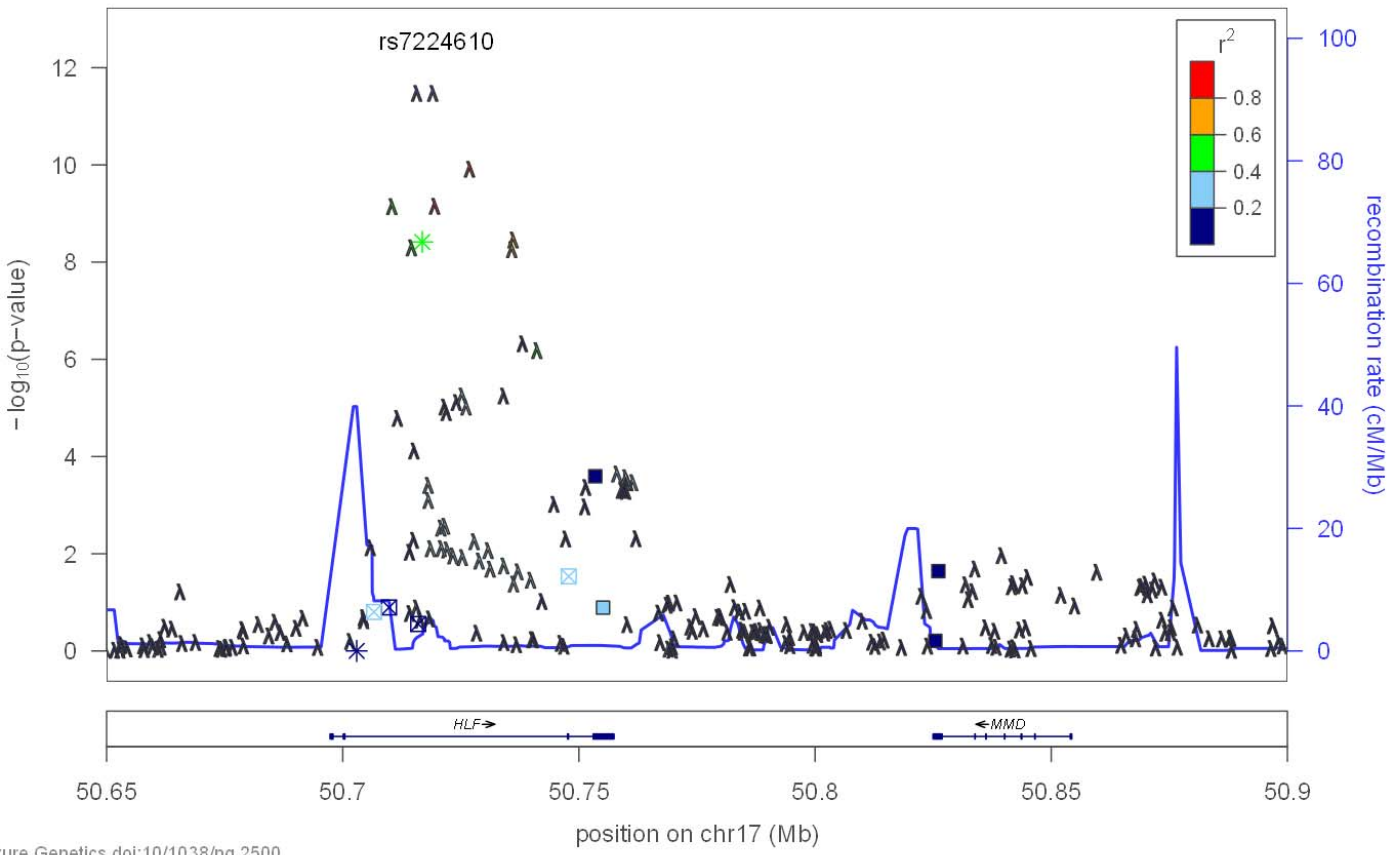

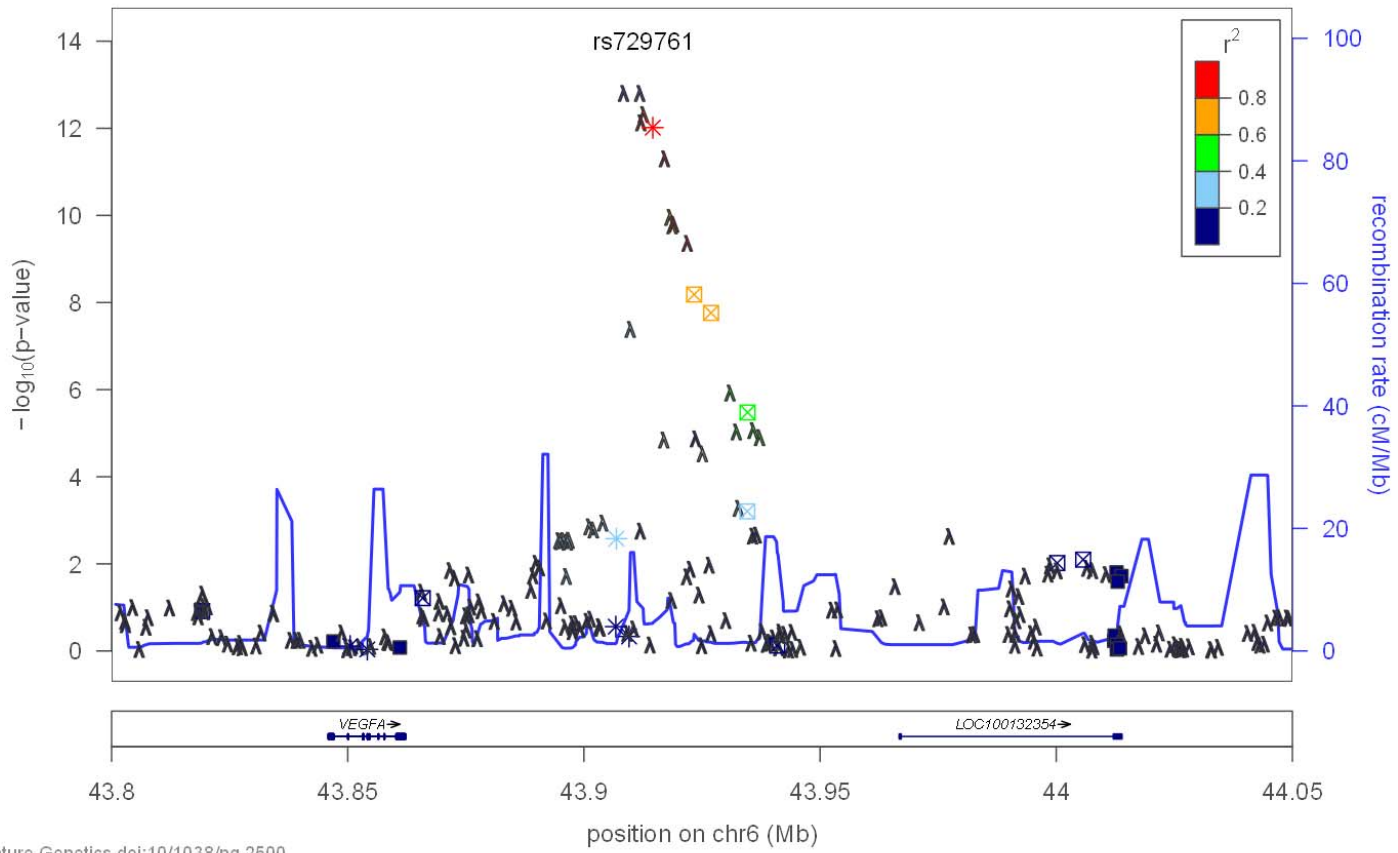

### Supplementary Figure 3: X Chromosomal Manhattan Plot

Manhattan Plot showing  $-\log_{10}$  (p-values) for all SNPs analyzed within the serum urate X chromosome analysis ordered by their chromosomal position. Results are shown for A) the overall sample, separately in B) men and C) women. Green dots indicate the location of two candidate gene regions *PRPS1* (left) and *HPRT1* (right).

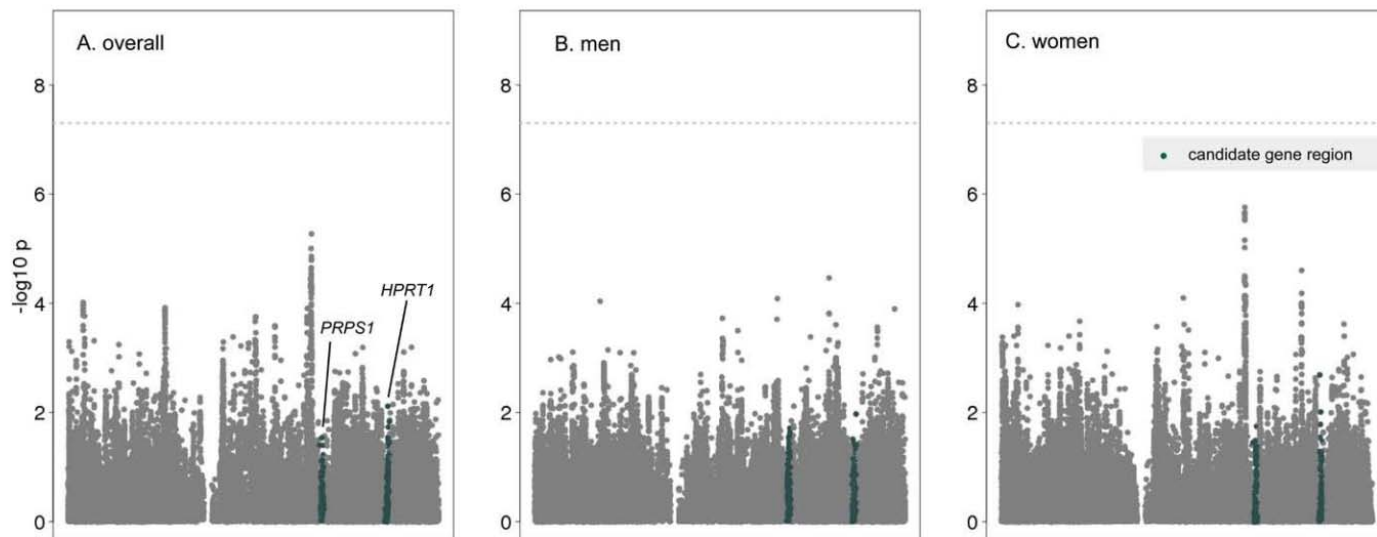

### Supplementary Figure 4: Manhattan Plot for Gout GWAS

Manhattan plot showing  $-\log_{10}$  (p-values) for all SNPs of the gout overall discovery GWAS ordered by their chromosomal position. Previously known loci are colored in blue.

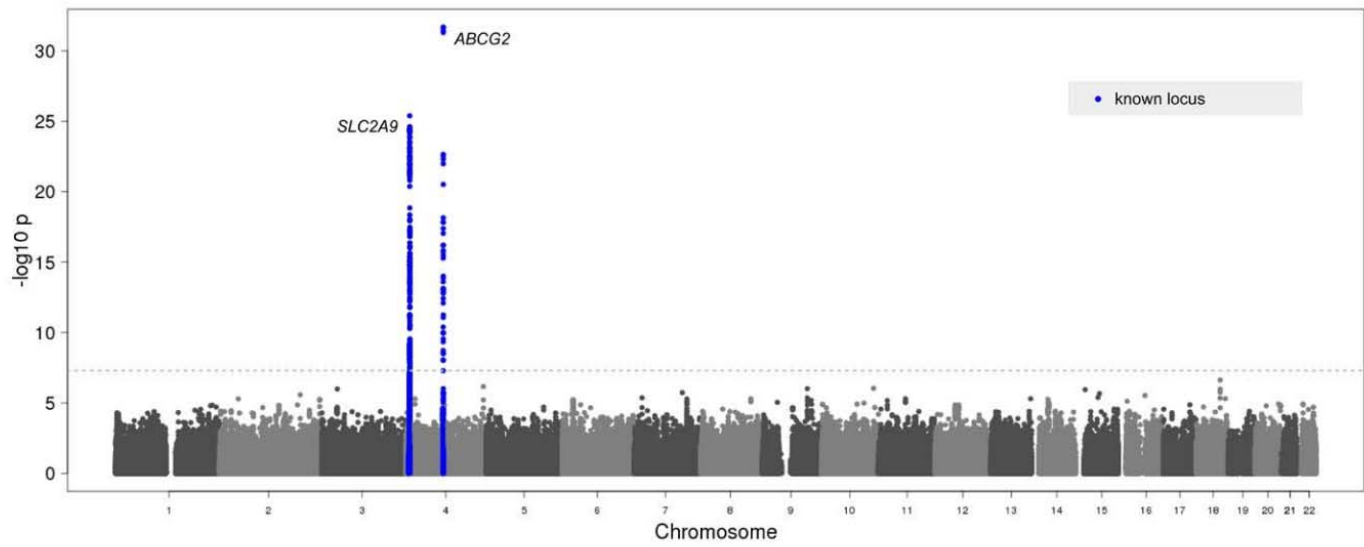

### Supplementary Figure 5: QQ Plot for Gout GWAS

Quantile-quantile plot showing observed p-values of gout meta-analysis vs. expected p-values by chance after removal of SNPs within +/- 1.5 Mb of the index SNP in *SLC2A9* and +/- 1 Mb of the index SNPs at 9 additional known urate-associated loci. A second genomic control step was applied to correct for the post meta-analysis of  $\lambda = 1.03$ .

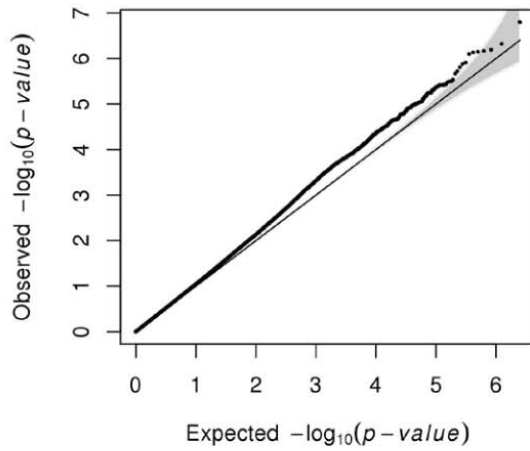



**Supplementary Figure 6: Risk Score Figure**

Showing the proportion of gout in relation to the computed genetic risk score in A) three population based studies (ARIC, KORA F4, and SHIP) and B) two nested case-cohort studies (HPFS and NHS).

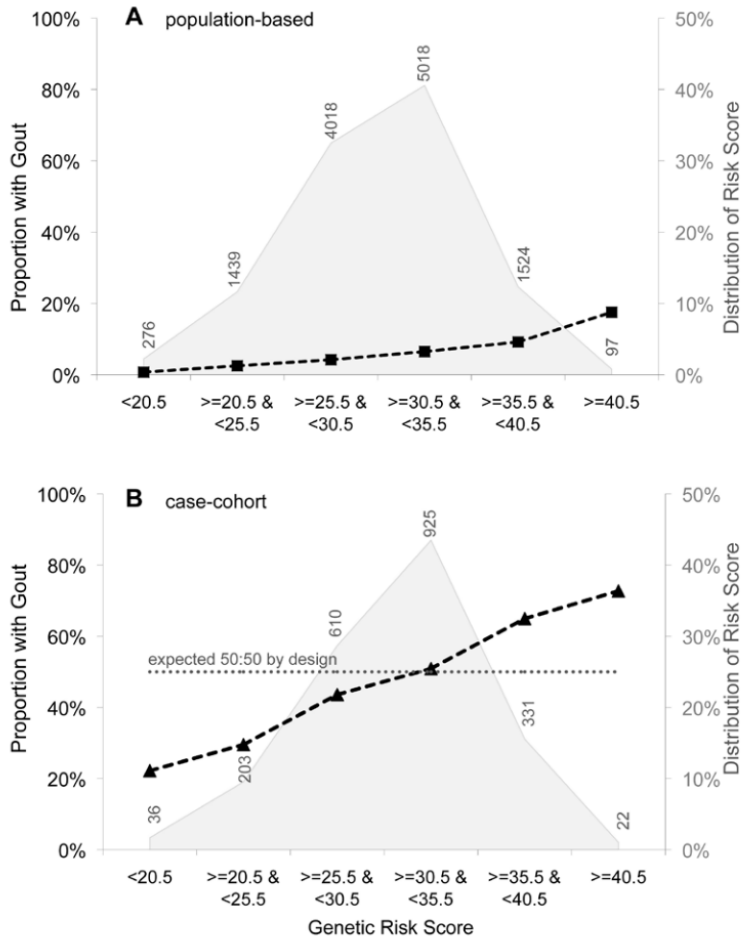

### Supplementary Figure 7: Regional Association Plots for Network SNPs

Regional association plots showing  $-\log_{10}$  (p-values) for all SNPs ordered by their chromosomal position within all regions of the network analysis as listed in **Table 2**.  $-\log_{10}$  (p-values) correspond to the urate discovery GWAS. Each SNP is colored according to its correlation with the index SNP within the region as specified in the color scheme. Correlation structures correspond to HapMap 2 CEU  $r^2$ . Gray color indicates unknown correlation. Data point symbols correspond to nonsense, non-synonymous, coding, UTR, splice variants, transcription factor binding sites and multi-species conservation according to dbSNP or the 1000 Genomes Project (August 2009 release)<sup>1</sup>. Plots are ordered by rs-number.

#### annotation key

|                |   |
|----------------|---|
| framestop      | ▲ |
| splice         | ▲ |
| nonsyn         | ▼ |
| coding         | □ |
| utr            | □ |
| tfbscons       | * |
| mcs44placental | ⊗ |
| no annotation  | ■ |

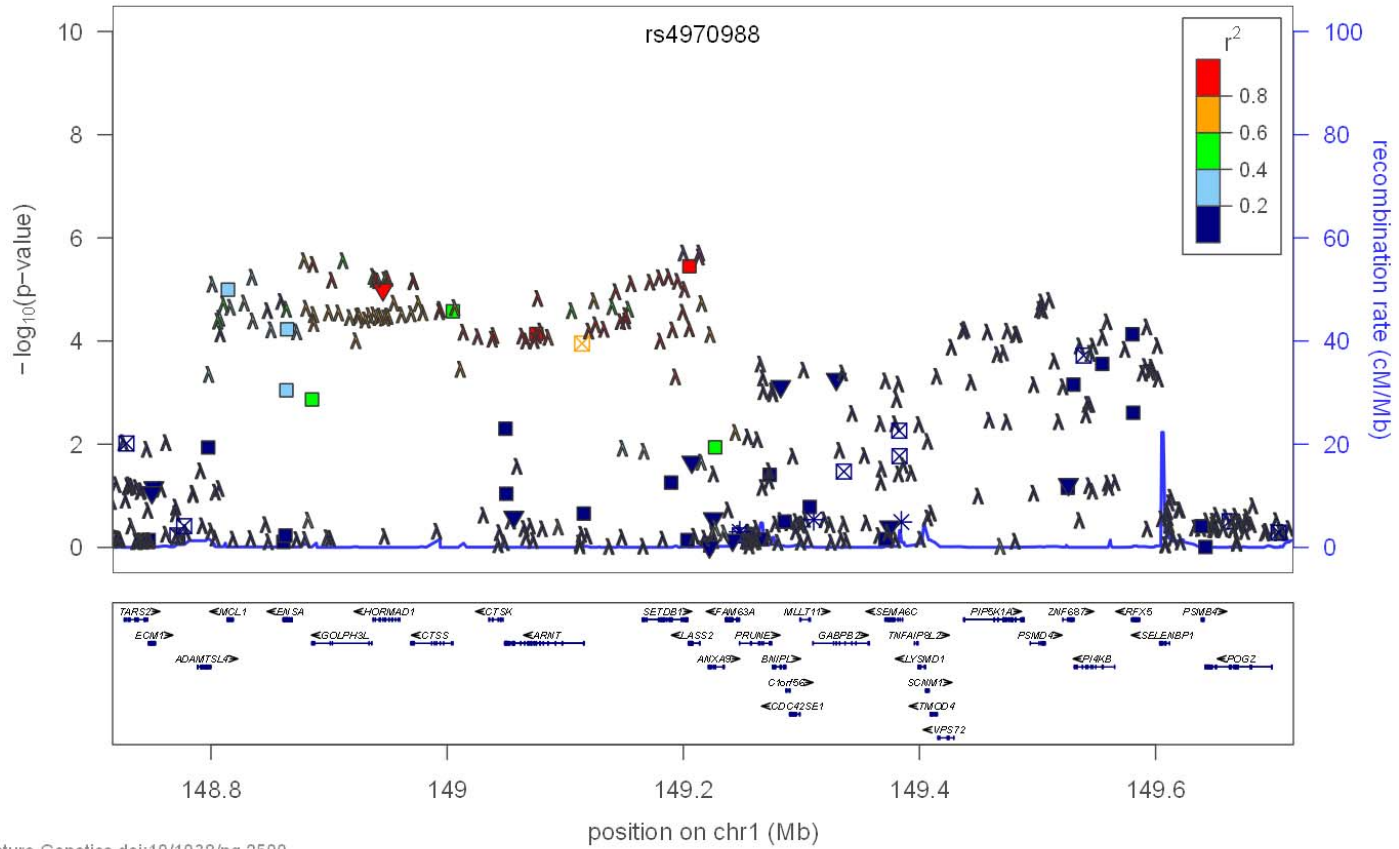

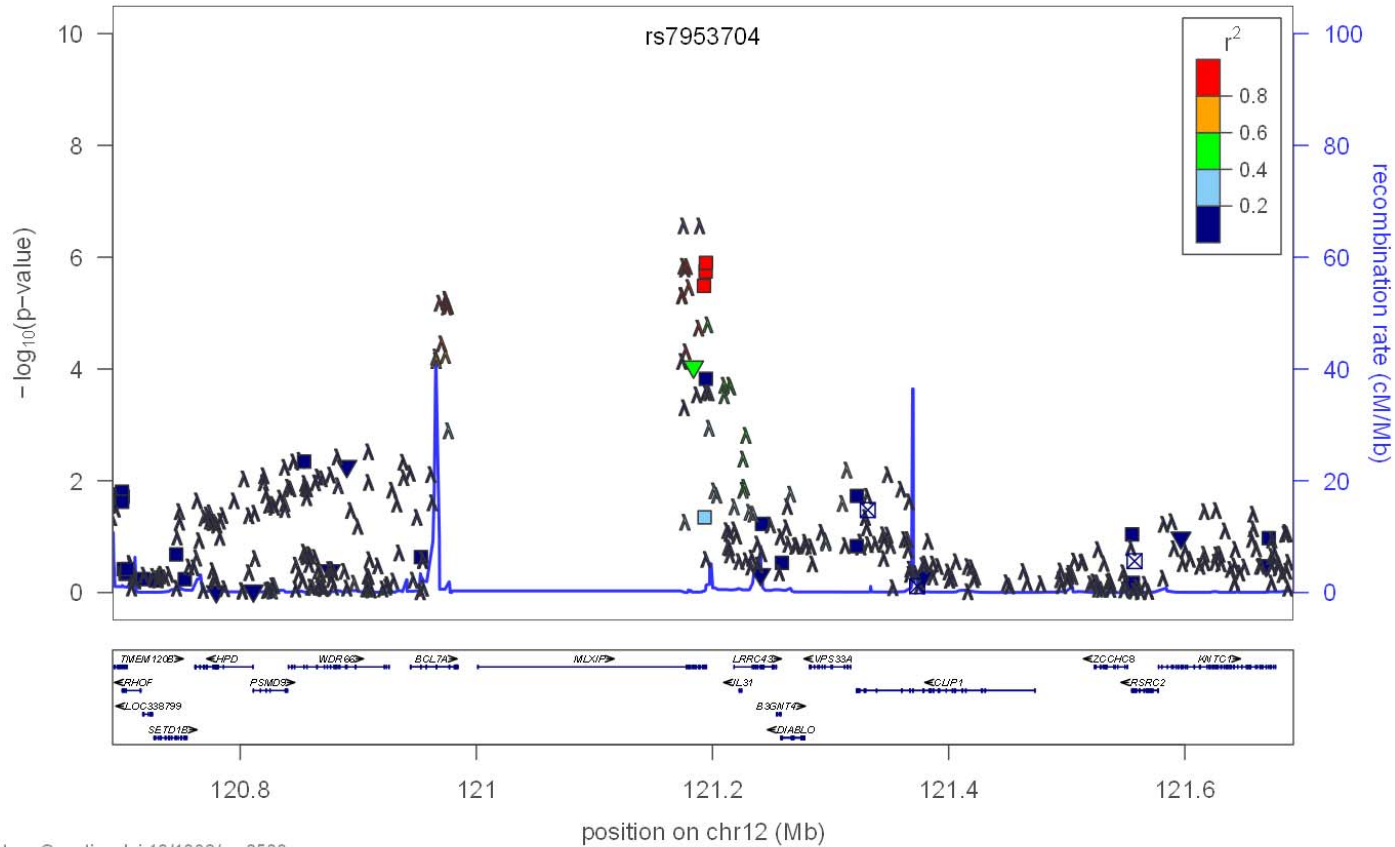

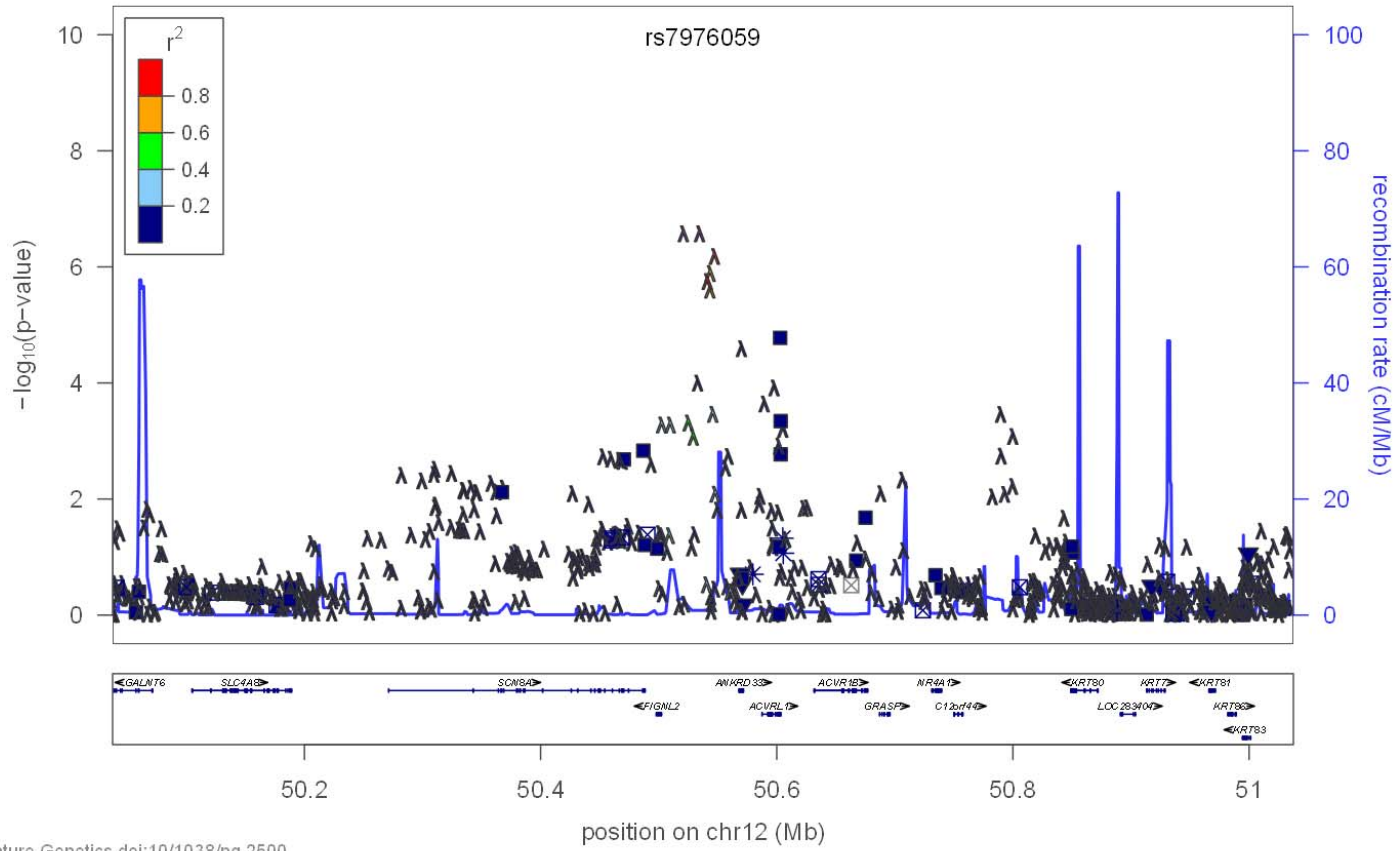

### Supplementary Figure 8: Inhibins-Activins Network

This figure highlights the interconnection of loci identified from serum urate GWAS analyses (seed genes, \*) with those from the functional association network approach. Connections were formed between seed and other genes that contained urate-associated SNPs after multiple testing-correction. The evidence is based on i) physical interactions of the encoded proteins and ii) database interactions as provided by the STRING database. The listed rs numbers correspond to the index SNPs of seed genes or to the SNP with the smallest p-value in or near the implicated additional genes. Detailed information is provided in the **Supplementary Note (Pathway-based Analyses)**.

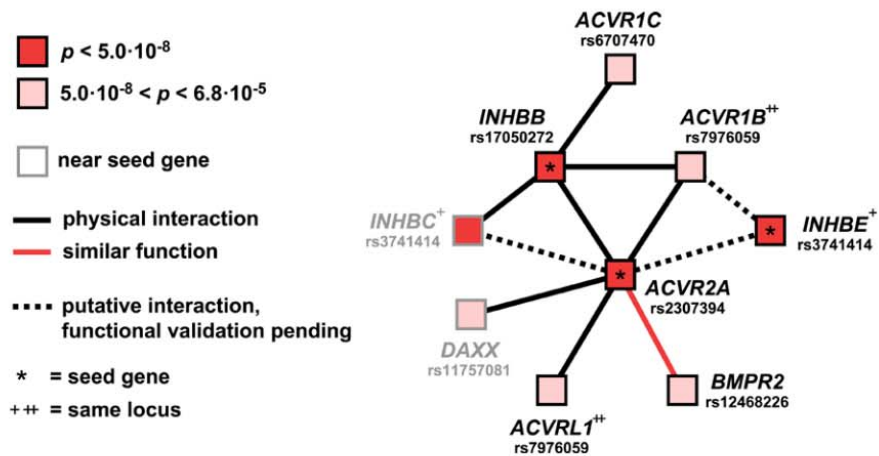

### Supplementary Figure 9: Growth Factors Network

This figure highlights the interconnection of loci identified from serum urate GWAS analyses (seed genes, \*) with those from the functional association network approach. Connections were formed between seed and other genes that contained urate-associated SNPs after multiple testing-correction. The evidence is based on i) physical interactions of the encoded proteins and ii) database interactions as provided by the STRING database. The listed rs numbers correspond to the index SNPs of seed genes or to the SNP with the smallest p-value in or near the implicated additional genes. Detailed information is provided in the **Supplementary Note (Pathway-based Analyses)**.

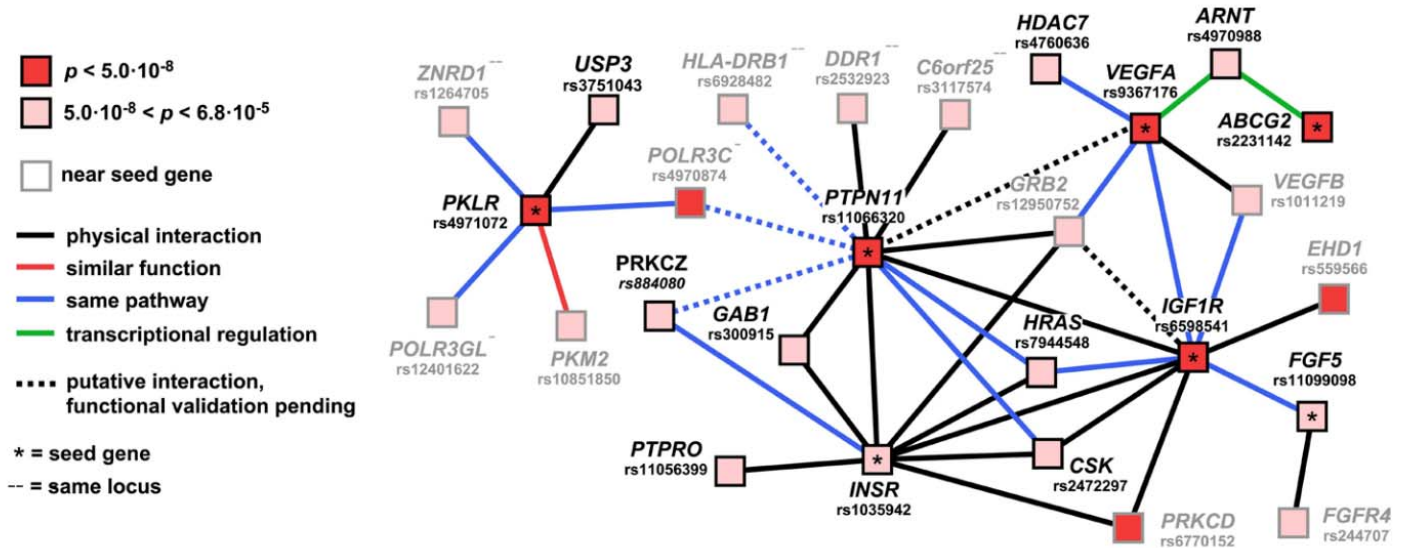

## Supplementary Tables

**Supplementary Table 1: Characteristics of the Analyzed Study Samples**  
(as used for the SNP association analyses)

| Study                      | Sample Size (Urate Analysis) | Age (SD), years | Women, % (n) | Serum urate (SD), mg/dl | Gout, % (cases/overall) |
|----------------------------|------------------------------|-----------------|--------------|-------------------------|-------------------------|
| <b>Discovery cohorts</b>   |                              |                 |              |                         |                         |
| AGES Reykjavik Study       | 3219                         | 76.4 (5.5)      | 58.0 (1867)  | 5.97 (1.62)             | 4.3 (137/3219)          |
| Amish                      | 1139                         | 49.8 (16.8)     | 48.1 (548)   | 4.2 (1.10)              | NA                      |
| ARIC                       | 9049                         | 54.3 (5.7)      | 52.9 (4790)  | 5.94 (1.50)             | 5.4 (395/7300)          |
| ASPS                       | 845                          | 65.2 (8.0)      | 43.2 (365)   | 5.32 (1.42)             | 6.0 (51/848)            |
| AUSTWIN                    | 11520                        | 39.2 (17.2)     | 59.5 (6855)  | 4.85 (1.32)             | NA                      |
| BLSA                       | 521                          | 70.6 (14.1)     | 47.8 (249)   | 5.21 (1.49)             | 4.4 (23/521)            |
| BRIGHT                     | 1743                         | 56.9 (10.3)     | 60.4 (1053)  | 5.39 (1.44)             | NA                      |
| CARDIA                     | 1713                         | 25.5 (3.3)      | 53.4 (914)   | 5.33 (1.37)             | NA                      |
| CHS                        | 3252                         | 72.3 (5.4)      | 60.9 (1979)  | 5.50 (1.44)             | 5.1 (164/3192)          |
| CoLaus                     | 5409                         | 53.4 (10.7)     | 52.9 (2863)  | 5.27 (1.42)             | 1.5 (79/5409)           |
| CROATIA-KORCULA            | 895                          | 56.2 (14.0)     | 63.9 (572)   | 4.92 (1.29)             | 4.7 (46/969)            |
| CROATIA-SPLIT              | 490                          | 49 (14.6)       | 57.9 (284)   | 4.80 (1.38)             | 3.2 (17/535)            |
| CROATIA-VIS                | 912                          | 56.4 (15.5)     | 57.7 (526)   | 5.23 (1.59)             | 6.4 (58/904)            |
| DESIR                      | 716                          | 50.2 (8.2)      | 75.1 (538)   | 3.86 (0.92)             | NA                      |
| EPIC-Norfolk cohort        | 1835                         | 59.3 (9.0)      | 54.3 (997)   | 4.99 (1.37)             | 2.2 (54/2405)           |
| ERF                        | 889                          | 49.6 (15.2)     | 60.7 (540)   | 5.52 (1.56)             | 1.1 (27/2385)           |
| Estonian Biobank           | 931                          | 39.4 (15.6)     | 50.8 (473)   | 4.95 (1.36)             | 0.9 (8/931)             |
| Family Heart Study (FamHS) | 3837                         | 52.1 (13.7)     | 52.4 (2011)  | 5.42 (1.47)             | NA                      |
| FHS                        | 7699                         | 37.9 (9.4)      | 53.1 (4089)  | 5.34 (1.51)             | 2.7 (197/7386)          |
| Health 2000                | 2069                         | 50.6 (11.0)     | 50.9 (1054)  | 5.17 (1.29)             | NA                      |
| InCHIANTI                  | 1205                         | 68.2 (15.5)     | 55.5 (669)   | 5.08 (1.43)             | 1.9 (19/1005)           |
| INCIPE                     | 940                          | 61.2 (11.5)     | 52.6 (495)   | 5.50 (1.45)             | NA                      |
| INGI-Carlantino            | 432                          | 49.9 (16.5)     | 61.3 (265)   | 4.90 (1.41)             | NA                      |
| INGI-CILENTO               | 859                          | 52.5 (19.4)     | 55.2 (474)   | 4.60 (1.59)             | NA                      |
| INGI-FVG                   | 1018                         | 48.2 (19.7)     | 61.6 (627)   | 5.55 (1.57)             | NA                      |
| INGI-Val Borbera           | 1658                         | 54.7 (18.3)     | 55.8 (925)   | 5.02 (1.28)             | 2.3 (39/1658)           |
| KORA F3                    | 1643                         | 62.5 (10.1)     | 50.5 (830)   | 5.21 (1.36)             | 6.3 (103/1644)          |
| KORA F4                    | 1814                         | 60.9 (8.9)      | 51.3 (930)   | 5.37 (1.45)             | 6.3 (114/1810)          |
| LBC1936                    | 769                          | 72.5 (0.7)      | 47.7 (367)   | 5.51 (1.47)             | 5.2 (40/769)            |
| LifeLines                  | 3343                         | 55.5 (9.9)      | 59.2 (1980)  | 5.04 (1.25)             | NA                      |
| LOLIPOP_EW_A               | 587                          | 54.3 (10.4)     | 12.9 (76)    | 5.62 (1.32)             | NA                      |
| LOLIPOP_EW_P               | 650                          | 55.7 (9.1)      | 0 (0)        | 5.75 (1.35)             | NA                      |
| LOLIPOP_EW610              | 924                          | 55.9 (9.8)      | 26.9 (249)   | 5.30 (1.45)             | NA                      |
| LURIC                      | 963                          | 62.0 (10.6)     | 27.8 (268)   | 5.04 (1.68)             | NA                      |
| MICROS                     | 1236                         | 45 (16.8)       | 56.8 (702)   | 5.31 (1.42)             | 3.0 (39/1300)           |
| NESDA                      | 1731                         | 42.3 (12.5)     | 67.9 (1176)  | 4.37 (1.17)             | NA                      |
| NSPHS                      | 655                          | 47.0 (20.7)     | 52.8 (346)   | 5.38 (1.42)             | NA                      |
| ORCADES                    | 888                          | 53.5 (15.7)     | 54.6 (485)   | 4.98 (1.20)             | NA                      |
| PREVEND                    | 3785                         | 49.6 (12.4)     | 48.85 (1849) | 5.12 (1.34)             | NA                      |



|                                    |        |             |             |             |                  |
|------------------------------------|--------|-------------|-------------|-------------|------------------|
| PROCARDIS                          | 3742   | 62.1 (7.0)  | 24.4 (913)  | 6.10 (1.46) | NA               |
| RS-I                               | 4274   | 70.1 (9.0)  | 61.6 (2633) | 5.41 (1.37) | 3.3 (196/5974)   |
| RS-II                              | 2123   | 64.8 (8.0)  | 54.4 (1155) | 5.25 (1.28) | 3.1 (66/2157)    |
| SardinIA                           | 4694   | 43.3 (17.6) | 56.3 (2643) | 4.32 (1.48) | 1.0 (49/4694)    |
| SHIP                               | 4067   | 49.7 (16.3) | 50.7 (2064) | 4.9 (1.4)   | 5.5 (211/3832)   |
| SOCCS                              | 1105   | 51.0 (5.7)  | 50 (553)    | 4.60 (1.25) | NA               |
| Sorbs                              | 896    | 47.2 (16.3) | 59.6 (534)  | 5.80 (1.64) | NA               |
| TwinsUK                            | 3640   | 48.1 (12.9) | 100 (3640)  | 4.49 (1.07) | NA               |
| WGHS                               | NA     | 68.9 (7.3)  | 100 (23294) | NA          | 1.2 (290/23294)  |
| Young Finns Study                  | 2023   | 37.7 (5.0)  | 54.7 (1107) | 4.74 (1.27) | NA               |
| <b>Total*</b>                      | 110347 |             |             |             | 3.0 (2115/69374) |
| <b>Replication cohorts</b>         |        |             |             |             |                  |
| EPIC cases                         | 793    | 59.3 (8.8)  | 58.4 (463)  | 5.51 (1.53) | 3.4 (38/1130)    |
| GHS I                              | 2995   | 55.9 (10.9) | 48.5 (1453) | 4.83 (1.47) | NA               |
| GHS II                             | 1179   | 55.1 (10.9) | 50.0 (590)  | 4.75 (1.47) | NA               |
| GSK cases                          | 819    | 50.9 (13.7) | 66.3 (543)  | 5.00 (1.40) | NA               |
| GSK controls                       | 851    | 51.9 (13.2) | 67.7 (576)  | 4.99 (1.34) | NA               |
| HPFS                               | NA     | 59.1 (8.4)  | 0 (0)       | NA          | 50.6 (717/1416)  |
| Hunter Community Study             | 1088   | 65.9 (7.4)  | 51.1 (556)  | 5.37 (1.34) | NA               |
| HYPEST                             | 751    | 57.8 (9.8)  | 63.5 (477)  | 5.79 (1.50) | NA               |
| KORA S2                            | 3685   | 49.6 (14.1) | 49.0 (1804) | 4.93 (1.47) | 2.5 (91/3681)    |
| Lifelines replication              | 5031   | 43.2 (9.1)  | 56.1 (2823) | 4.85 (1.21) | NA               |
| LURIC replication GZ               | 804    | 59.0 (12.0) | 34.0 (273)  | 5.0 (1.7)   | NA               |
| LURIC replication HD               | 1156   | 64.9 (9.2)  | 29.8 (344)  | 5.2 (1.7)   | NA               |
| MARS cases                         | 636    | 48.4 (14.0) | 52.7 (335)  | 5.19 (1.29) | NA               |
| NHS                                | NA     | 55.8 (6.3)  | 100 (711)   | NA          | 45 (319/711)     |
| OGP (Ogliastra)                    | 9556   | 49.6 (17.9) | 56.1 (5558) | 4.36 (1.48) | 1.9 (187/9556)   |
| OGP-Talana                         | 1039   | 50.9 (19.1) | 55.9 (581)  | 4.59 (1.64) | 2.3 (20/862)     |
| SAPALDIA asthmatics                | 570    | 51.3 (11.3) | 52.5 (299)  | 5.31 (1.49) | NA               |
| SAPALDIA non-asthmatics            | 874    | 52.9 (11.1) | 50.1 (438)  | 5.25 (1.46) | NA               |
| SHIP-Trend                         | 986    | 50.1 (13.7) | 56.2 (554)  | 4.79 (1.25) | NA               |
| <b>Samples of other ancestries</b> |        |             |             |             |                  |
| LOLIPOP_IA317                      | 2139   | 48.3 (10.5) | 0           | 5.6 (1.3)   | NA               |
| LOLIPOP_IA610                      | 5589   | 56.9 (10.0) | 18.4 (1030) | 5.6 (1.5)   | NA               |
| LOLIPOP_IA_P                       | 612    | 51.1 (8.3)  | 0           | 5.5 (1.3)   | NA               |
| ARIC African American              | 2749   | 53 (5.8)    | 62.9 (1728) | 6.3 (1.7)   | 8.3 (159/1908)   |
| CARDIA African American            | 937    | 24 (3.8)    | 60.9 (571)  | 5.1 (1.3)   | 1.95 (18/923)    |
| JHS African American               | 2134   | 50 (12.1)   | 60.8 (1297) | 5.5 (1.7)   | NA               |
| BioBank Japan                      | 15288  | 63.0 (11.7) | 43.6 (6665) | 5.4 (1.5)   | NA               |

Study sample characteristics are presented for the sample with urate measurements if sample size for gout is different. \*refers to the samples used in the main analyses.

**Supplementary Table 2: Study Sample Characteristics**

| Study Name                                       | Study Design                                      | Total Genotyped Sample Size | Exclusion Criteria for Study Participation or Disease Enrichment | Exclusions                                                                                                                                                                                                                                                                                                                                                             | Population Stratification                                                                                          | UA Measurement and QC                                                                                                                                                                                                                                     | Gout Definition                                                                                                                    | Key Study References                                                                                  |
|--------------------------------------------------|---------------------------------------------------|-----------------------------|------------------------------------------------------------------|------------------------------------------------------------------------------------------------------------------------------------------------------------------------------------------------------------------------------------------------------------------------------------------------------------------------------------------------------------------------|--------------------------------------------------------------------------------------------------------------------|-----------------------------------------------------------------------------------------------------------------------------------------------------------------------------------------------------------------------------------------------------------|------------------------------------------------------------------------------------------------------------------------------------|-------------------------------------------------------------------------------------------------------|
| <b>Discovery Studies</b>                         |                                                   |                             |                                                                  |                                                                                                                                                                                                                                                                                                                                                                        |                                                                                                                    |                                                                                                                                                                                                                                                           |                                                                                                                                    |                                                                                                       |
| AGES Reykjavik Study                             | Prospective, population-based                     | 3,219 of European ancestry  | none                                                             | none                                                                                                                                                                                                                                                                                                                                                                   | All individuals from Iceland, with no significant stratification within the population.                            | Serum urate was measured at the Icelandic Heart Association using the Roche-Hitachi P-Module instrument with Roche uricase method. The coefficient of variation for the urate assay was 4.3%.                                                             | Gout was determined from a positive answer on a questionnaire or if the participant was on allopurinol treatment at a study visit. | Harris et al. (2007) <sup>2</sup>                                                                     |
| Amish Studies                                    | Founder "healthy" population based <sup>3</sup> . | European ancestry           | none                                                             | none                                                                                                                                                                                                                                                                                                                                                                   | NA                                                                                                                 | Serum UA levels drawn at the screening exam were assayed by Quest Diagnostics (Baltimore, MD) and measured to the nearest 0.1 mg/dl <sup>4</sup> .                                                                                                        | NA                                                                                                                                 | Mitchell et al. (2008) <sup>3</sup> , McArdle et al. (2008) <sup>4</sup>                              |
| Atherosclerosis Risk in Communities (ARIC) Study | Prospective, population-based <sup>5</sup>        | 9,713 of European ancestry  | none                                                             | Of the 9713 genotyped individuals of European ancestry, we excluded 658 individuals based on discrepancies with previous genotypes, disagreement between reported and genotypic sex, one randomly selected member of a pair of first-degree relatives, or outlier based on measures of average DST or more than 8 SD away on any of the first 10 principal components. | Two principal components were associated with uric acid measurements and included as covariates in the regression. | UA was measured using the uricase method <sup>6</sup> at study visit 1. Repeated measurements of UA in 40 individuals, taken at least one week apart, yielded a reliability coefficient of 0.91, and the coefficient of variation was 7.2% <sup>7</sup> . | Gout was defined by self-report at study visit 4 based on the question "did a doctor ever tell you that you had gout?".            | ARIC (1989) <sup>5</sup> , Iribarren et al. (1996) <sup>6</sup> , Eckfeldt et al. (1994) <sup>7</sup> |
| Austrian Stroke Prevention                       | Prospective, population-based                     | 923 genotyped Caucasians    | no history or signs of stroke and dementia                       | Of the 923 genotyped individuals we excluded 67 subjects based on excess                                                                                                                                                                                                                                                                                               | Age and sex were included as covariates in the                                                                     | UA was measured using the uricase method on a Hitachi                                                                                                                                                                                                     | A subject was defined as having gout at                                                                                            | Schmidt et al. (1994) <sup>8</sup>                                                                    |

|                                                     |                                                                  |                                     |                                                                                                                                                                                  |                                                                                                                                                                                                                                                                                                                                                                                                                      |                                                                                  |                                                                                                                                                                                                                       |                                                                                                                      |                                                                                                                      |
|-----------------------------------------------------|------------------------------------------------------------------|-------------------------------------|----------------------------------------------------------------------------------------------------------------------------------------------------------------------------------|----------------------------------------------------------------------------------------------------------------------------------------------------------------------------------------------------------------------------------------------------------------------------------------------------------------------------------------------------------------------------------------------------------------------|----------------------------------------------------------------------------------|-----------------------------------------------------------------------------------------------------------------------------------------------------------------------------------------------------------------------|----------------------------------------------------------------------------------------------------------------------|----------------------------------------------------------------------------------------------------------------------|
| Study (ASPS)                                        |                                                                  | living in the city of Graz, Austria |                                                                                                                                                                                  | autosomal heterozygosity, mismatch between called and phenotypic gender, or by being outliers identified by the IBD analysis. The final population for genetic analysis comprised 856 subjects. Additionally serum urate was not available in 3 cases.                                                                                                                                                               | regression                                                                       | 917 chemical analyzer at study visit 1. Reproducibility was assessed in 21 subjects and revealed a variation coefficient of 1.7%                                                                                      | study visit 1 if he/she reported a history of elevated uric acid levels and was currently treated for hyperuricemia. |                                                                                                                      |
| Australian Twin-Family Study (AUSTWIN)              | Population-based, twin-pairs and their families                  | 11,520 of European ancestry         | none                                                                                                                                                                             | Samples were excluded for less than 95% of SNPs successfully typed, sex or Mendelian errors, Non-European ancestry                                                                                                                                                                                                                                                                                                   | Two principal components were included as covariates in the regression.          | Serum uric acid was measured with the uricase method on a Roche 917 or Modular P analyser.                                                                                                                            | NA                                                                                                                   | Whitfield et al. (2002) <sup>9</sup> , Middelberg et al. (2007) <sup>10</sup> , Benyamin et al. (2009) <sup>11</sup> |
| Baltimore Longitudinal Study of Aging (BLSA)        | Prospective, population-based                                    | 1,230                               | none                                                                                                                                                                             | Of the 1230 genotyped subjects, genetic relatedness was assessed using PCA analysis using the HapMap population as reference. Out of the 857 subjects of European ancestry, 5 subjects were excluded for low genotyping (< 98.5%), 4 subjects were removed for sex misspecification. From the 848 subjects with European ancestry passing quality control, 718 subjects with uric acid data was used for this study. | Use top two principle components included as covariates in the regression model. | UA was measured using the uricase method (Johnson and Johnson, VITROS chemistry system).                                                                                                                              | NA                                                                                                                   | Shock et al. (1984) <sup>12</sup>                                                                                    |
| The BRITish Genetics of HyperTension (BRIGHT) study | Hypertensive cases from the BRIGHT study resource <sup>4</sup> . | 1,743                               | Control exclusion criteria included BMI>35, diabetes, secondary hypertension or a co-existing illness. Blood pressure was measured using the OMRON-705CP blood pressure monitor. | Of 2000 cases typed, we excluded 257 people with poor genotype quality.                                                                                                                                                                                                                                                                                                                                              | NA                                                                               | Non-fasting blood samples were obtained from study participants and UA analyses was carried out on frozen serum stored at -20 C. UA concentrations were measured using an uricase method on a Hitachi auto-analyser). | NA                                                                                                                   | Caulfield et al. (2003) <sup>13</sup>                                                                                |

|                                                       |                                   |                                  |                                                                                                                                                                            |                                                                                                                                                                                                                                                                                                                                        |                                                                                                                                                                                                        |                                                                                                                                                                                                                                                                                        |                                                                                                                                                      |                                                                                                                                                                                                                                                               |
|-------------------------------------------------------|-----------------------------------|----------------------------------|----------------------------------------------------------------------------------------------------------------------------------------------------------------------------|----------------------------------------------------------------------------------------------------------------------------------------------------------------------------------------------------------------------------------------------------------------------------------------------------------------------------------------|--------------------------------------------------------------------------------------------------------------------------------------------------------------------------------------------------------|----------------------------------------------------------------------------------------------------------------------------------------------------------------------------------------------------------------------------------------------------------------------------------------|------------------------------------------------------------------------------------------------------------------------------------------------------|---------------------------------------------------------------------------------------------------------------------------------------------------------------------------------------------------------------------------------------------------------------|
| Coronary Artery Disease Risk in Young Adults (CARDIA) | Prospective, population-based     | 1,725 of European Ancestry       | none                                                                                                                                                                       | 1 sex mismatch; 3 outliers in PCA; 1 discordant genotype                                                                                                                                                                                                                                                                               | 4 principal components included as covariates; none associated with UA                                                                                                                                 | Serum uric acid was measured by the uricase method at multiple visits. The coefficient of variation of uric acid was 2.6%; the split sample technical error was 4.6%.                                                                                                                  | NA                                                                                                                                                   | Friedman et al. (1988) <sup>14</sup> ; The data collection forms used at each exam as well as the CARDIA protocols are available from the CARDIA website: <a href="http://www.cardia.dopm.uab.edu/em_dacf.htm">http://www.cardia.dopm.uab.edu/em_dacf.htm</a> |
| The Cardiovascular Health Study (CHS)                 | Prospective, population-based     | 3,329 CHS Caucasian participants | 1908 persons were excluded due coronary heart disease, congestive heart failure, peripheral vascular disease, valvular heart disease, stroke or transient ischemic attack. | The present report is based upon genotyping results from 3,329 CHS Caucasian participants, who were free of clinical cardiovascular disease at baseline, consented to genetic testing, and had DNA available for genotyping. Genotypes were called using the Illumina BeadStudio software. Genotyping was successful in 3,291 persons. | Study sites (clinic sites) were included as covariates in the regression to account for population stratification.                                                                                     | Serum uric acid concentrations were measured at the baseline visit using the Kodak Ektachem 700 Analyzer with reagents (Eastman Kodak, Rochester, NY). The final study sample with available genotype and phenotype data consisted of 3,252 individuals for the analyses of uric acid. | Intake of previous or current gout-specific medication: colchicine, probenecid, or allopurinol. Total of 3,192 individuals for the analyses of gout. | Fried et al. (1991) <sup>15</sup>                                                                                                                                                                                                                             |
| Cohorte Lausannoise (CoLaus) Study                    | Population based                  | 5,636 of European ancestry       | none                                                                                                                                                                       | Individuals with call rate below 90% were excluded. The younger of 1 <sup>st</sup> /2 <sup>nd</sup> degree related pairs were removed from the analysis.                                                                                                                                                                               | First two ancestry principal components were used as covariates.                                                                                                                                       | Serum uric acid was measured by uricase-PAP (1.0% - 0.5% maximum inter and intra-batch coefficients of variation).                                                                                                                                                                     | Gout was indirectly defined: People taking allopurinol or colchicine.                                                                                | Firmann et al. (2008) <sup>16</sup>                                                                                                                                                                                                                           |
| CROATIA-KORCULA                                       | Cross-sectional, population-based | 971                              | none                                                                                                                                                                       | 898 individuals left after QC based on genotyping quality, sex and ancestry check                                                                                                                                                                                                                                                      | None of the first 3 principal components strongly associated with uric acid; relatedness of participants taken into account using a mixed linear model with the polygenic effect set as random effect. | UA was measured using the uricase UV photometry method in "Labor Centar" biochemical lab, Bukovcevc trg 3, 10000 Zagreb Croatia ( <a href="http://www.laborcentar.hr">www.laborcentar.hr</a> ).                                                                                        | Gout case based on self-report and medication; 46 cases                                                                                              | Zemunik et al. (2009) <sup>17</sup>                                                                                                                                                                                                                           |
| CROATIA-SPLIT                                         | Cross-sectional, population-based | 535                              | none                                                                                                                                                                       | 499 individuals left after QC based on genotyping quality, sex and ancestry check.                                                                                                                                                                                                                                                     | None of the first 3 principal components strongly associated                                                                                                                                           | UA was measured using the uricase UV photometry method in "Labor Centar"                                                                                                                                                                                                               | Gout case based on self-report and medication; 17                                                                                                    | Rudan et al. (2009) <sup>18</sup>                                                                                                                                                                                                                             |

|                                                                                                                                                    |                                                                                   |                            |      |                                                                                                                                                                                                              |                                                                                                                                                                                                        |                                                                                                                                                                                                                                                                                                                                                                                                                                        |                                                                          |                                                                                                                             |
|----------------------------------------------------------------------------------------------------------------------------------------------------|-----------------------------------------------------------------------------------|----------------------------|------|--------------------------------------------------------------------------------------------------------------------------------------------------------------------------------------------------------------|--------------------------------------------------------------------------------------------------------------------------------------------------------------------------------------------------------|----------------------------------------------------------------------------------------------------------------------------------------------------------------------------------------------------------------------------------------------------------------------------------------------------------------------------------------------------------------------------------------------------------------------------------------|--------------------------------------------------------------------------|-----------------------------------------------------------------------------------------------------------------------------|
|                                                                                                                                                    |                                                                                   |                            |      |                                                                                                                                                                                                              | with uric acid; relatedness of participants taken into account using a mixed linear model with the polygenic effect set as random effect.                                                              | biochemical lab, Bukovcevi trg 3, 10000 Zagreb Croatia ( <a href="http://www.laborcentar.hr">www.laborcentar.hr</a> ).                                                                                                                                                                                                                                                                                                                 | cases                                                                    |                                                                                                                             |
| CROATIA-VIS                                                                                                                                        | Cross-sectional, population-based                                                 | 991                        | none | 924 individuals left after QC based on genotyping quality, sex and ancestry check                                                                                                                            | None of the first 3 principal components strongly associated with uric acid; relatedness of participants taken into account using a mixed linear model with the polygenic effect set as random effect. | UA was measured using the uricase UV photometry method in "Labor Centar" biochemical lab, Bukovcevi trg 3, 10000 Zagreb Croatia ( <a href="http://www.laborcentar.hr">www.laborcentar.hr</a> ). A subset of 774 samples had also been measured independently in the Institute for Clinical Chemistry and Laboratory Medicine, University Hospital Regensburg, Germany. Pearson correlation between the two urate measurements was 94%. | Gout case based on self-report and medication; 58 cases used in analysis | Vitart et al. (2006) <sup>19</sup>                                                                                          |
| Data from the Epidemiological Study on the Insulin Resistance Data from the Epidemiological Study on the Insulin Resistance Syndrome (DESIR) Study | Controls for the study of T2D and obesity selected from a population-based study. | 716 of European ancestry   | none | Using the STRUCTURE software, we identified 4 individuals of non-European ancestry. In order to minimize admixture bias in the rest of the DESIR participants, we excluded these individuals before analyses | none                                                                                                                                                                                                   | UA was measured using the uricase method <sup>20</sup> at study visit 1. Repeated measurements of UA in 40 individuals, taken at least one week apart, yielded a reliability coefficient of 0.91, and the coefficient of variation was 7.2% <sup>21</sup> .                                                                                                                                                                            | NA                                                                       | Balkau et al. (1997) <sup>20</sup> , Vernay et al. (2004) <sup>21</sup>                                                     |
| European Prospective Investigation of Cancer (EPIC) Norfolk Study                                                                                  | Prospective, population-based, case-cohort design consisting of a random sample   | 3,850 of European ancestry | none | We excluded individuals who were duplicated samples DNA concordance >99%, cryptically related, related individuals DNA concordance >70% and                                                                  | The 3552 individuals who were used for GWAS repeatedly showed no evidence of                                                                                                                           | Out of these individuals 2856 had uric acid measured, marked as serum L:89 H:1785 umol/L Olympus AU640.                                                                                                                                                                                                                                                                                                                                | Gout was defined as gout mentioned on hospital discharge records (ICD10  | Day et al. (1999) <sup>22</sup> , * <a href="http://www.srl.cam.ac.uk/epic/about/">http://www.srl.cam.ac.uk/epic/about/</a> |

|                                                       |                                                                                |                            |      |                                                                                                                                                                                                                                                                                                                                                                                                                                                                                                                                                               |                                                                                                                                                                                                                                                                                                                                                 |                                                                                                                                                                              |                                                                                                                             |                                                                                                                                                                                                                     |
|-------------------------------------------------------|--------------------------------------------------------------------------------|----------------------------|------|---------------------------------------------------------------------------------------------------------------------------------------------------------------------------------------------------------------------------------------------------------------------------------------------------------------------------------------------------------------------------------------------------------------------------------------------------------------------------------------------------------------------------------------------------------------|-------------------------------------------------------------------------------------------------------------------------------------------------------------------------------------------------------------------------------------------------------------------------------------------------------------------------------------------------|------------------------------------------------------------------------------------------------------------------------------------------------------------------------------|-----------------------------------------------------------------------------------------------------------------------------|---------------------------------------------------------------------------------------------------------------------------------------------------------------------------------------------------------------------|
|                                                       | (cohort) of 2566 participants at baseline and 1284 obese cases <sup>22,*</sup> |                            |      | <99%, ethnic outliers, and heterozygosity <23% or >30%. In the discovery analysis only controls were used. Obese cases were used for replication.                                                                                                                                                                                                                                                                                                                                                                                                             | population stratification. Consequently, we have not adjusted for population stratification.                                                                                                                                                                                                                                                    |                                                                                                                                                                              | M10, between 1997-2008) or self-reported gout specific medication (colchicine, probenecid or allopurinol) at any follow-up. |                                                                                                                                                                                                                     |
| Erasmus Ruchphen Family (ERF) Study                   | Family based                                                                   | 2,385                      | none | none                                                                                                                                                                                                                                                                                                                                                                                                                                                                                                                                                          | Score test for association in related people implemented in R package GenABEL was used to control for family related ness.                                                                                                                                                                                                                      | UA concentrations were measured using an uricase/oxidase method (DVIA1650-Autoanalyzer, Siemens Healthcare Diagnostics)                                                      | Gout was defined by intake of gout-specific medication: colchicine, probenecid or allopurinol                               | Pardo et al. (2005) <sup>23</sup>                                                                                                                                                                                   |
| Estonian Genome Center of University of Tartu (EGCUT) | Prospective, population-based                                                  | 931 of European ancestry   | none | Low genotyping quality (call rate <98%, MAF <1%, HWE p-value 10E-6); disagreement between reported and genotypic sex, one randomly selected member of a pair of first-degree relatives                                                                                                                                                                                                                                                                                                                                                                        | Three principal components were associated with uric acid measurements and included as covariates in the regression.                                                                                                                                                                                                                            | UA was measured using the uricase method                                                                                                                                     | Diagnosed at least by family doctor in ICD10 coding M.10                                                                    | Nelis et al. (2009) <sup>24</sup> , Metspalu et al. (2004) <sup>25</sup>                                                                                                                                            |
| Family Heart Study (FamHS)                            | Population family-based <sup>26</sup>                                          | 4,135 of European ancestry |      | Quality control was performed before imputation. To assess Mendelian errors, we ran LOKI on our family data and removed 5,035 SNPs with Mendelian errors. We also removed 2 individuals that had an unaccepted number of Mendelian errors. As a final familial QC check, we used GRR software to check familial relationships based on IBS. Quality control procedures for SNPs included cleaning SNPs reported by Illumina as uninformative and unavailable on successive arrays (n=13,844), removing SNPs due to deviations from Hardy-Weinberg equilibrium | Ten principal components (EIGENSTRAT) were estimated using the genotype data of the largest sample of independent subjects (N= 753) and then applied to the family members. These principal components were included in the adjustment procedure of uric acid using stepwise regression analysis and held if they were significant at 5% level. | Uric acid was measured by a thin film adaptation of an uricase enzymatic method using the Vitros analyzer (Johnson & Johnson Clinical Diagnostics, Inc. Rochester NY 14650). | NA                                                                                                                          | Higgins et al. (1996) <sup>26</sup> , Neogi et al. (2011) <sup>27</sup> , Neogi et al. (2009) <sup>28</sup> , Tang et al. (2006) <sup>29</sup> , Tang et al. (2003) <sup>30</sup> , Wilk et al (2000) <sup>31</sup> |

|                            |                           |             |      |                                                                                                                                                                                                                                                                                                                                                                                                             |                                                                                                                                                                                                                                                                                                                                                                                    |                                                                                                                                  |                                                                                                                                   |                                                                                                                 |
|----------------------------|---------------------------|-------------|------|-------------------------------------------------------------------------------------------------------------------------------------------------------------------------------------------------------------------------------------------------------------------------------------------------------------------------------------------------------------------------------------------------------------|------------------------------------------------------------------------------------------------------------------------------------------------------------------------------------------------------------------------------------------------------------------------------------------------------------------------------------------------------------------------------------|----------------------------------------------------------------------------------------------------------------------------------|-----------------------------------------------------------------------------------------------------------------------------------|-----------------------------------------------------------------------------------------------------------------|
|                            |                           |             |      | ( $p < 1E-06$ ) or SNPs with minor allele frequency $< 1\%$ or $> 99\%$ ( $n = 22,088$ ), and removing SNPs that are available in our data but not in HapMap ( $n = 1,509$ ). Additionally, 21 SNPs were designated as ambiguous and removed. After these quality control procedures, genotypes are available for 4,135 European American (EA) subjects with imputed genotypes for $\sim 2.5$ million SNPs. |                                                                                                                                                                                                                                                                                                                                                                                    |                                                                                                                                  |                                                                                                                                   |                                                                                                                 |
| The Framingham Heart Study | Prospective, family based | 9,274       | none | Individuals with a sample call rate $< 97\%$ , or heterozygosity $> \pm 5$ SD from the mean are excluded from association analyses.                                                                                                                                                                                                                                                                         | Principal components of the genotypes of 550K SNPs were computed using the Eigenstrat software 5, and none of the first 10 components were found associated with either urate levels or gout using a Bonferroni correction on alpha of 0.05, which indicated that there is little population admixture for these two traits and therefore no need to adjust for admixture in GWAS. | Serum urate was measured at the first examination cycle of each cohort using an autoanalyzer with a phosphotungstic acid reagent | Gout was ascertained via self-report in the Offspring subjects during exam cycles 3-7, and the first exam of the Third Generation | Dawber et al. (1963) <sup>32</sup> , Crowley et al. (1964) <sup>33</sup>                                        |
| Health 2000                | Population-based          | 2,123 Finns | none | Samples with discrepancy between reported and genotypic sex were excluded. For pairs with $p_{\text{L\_hat}} > 0.2$ one of the pairs was excluded. Individuals with $0.05 < p_{\text{I\_hat}} < 0.2$ to many other individuals were excluded.                                                                                                                                                               | NA                                                                                                                                                                                                                                                                                                                                                                                 | Uricase method, a colorimetric enzymatic method (Thermo Fisher Scientific, Vantaa, Helsinki).                                    | NA                                                                                                                                | <a href="http://www.terveys2000.fi/doc/methodologyrep.pdf">http://www.terveys2000.fi/doc/methodologyrep.pdf</a> |

|                 |                                                                                                                                                                       |                         |      |                                                                                                                                                                                                                    |                                                  |                                                                                                                                                                                                                                                                            |    |                                                                                                                                                                                                                                                                                                                                          |
|-----------------|-----------------------------------------------------------------------------------------------------------------------------------------------------------------------|-------------------------|------|--------------------------------------------------------------------------------------------------------------------------------------------------------------------------------------------------------------------|--------------------------------------------------|----------------------------------------------------------------------------------------------------------------------------------------------------------------------------------------------------------------------------------------------------------------------------|----|------------------------------------------------------------------------------------------------------------------------------------------------------------------------------------------------------------------------------------------------------------------------------------------------------------------------------------------|
| InCHIANTI study | Prospective, population-based                                                                                                                                         | 1,230 European ancestry | none | Of the 1231 genotyped subjects, 22 subjects were removed based on genotyping completeness (<97%), low heterozygosity (<0.3), or sex misspecification. 1205 subjects with uric acid data was used for the analysis. | Genomic Control                                  | Plasma UA (mg/dl) was measured using an enzymatic-colorimetric method (Roche Diagnostics, GmbH, Germany). The lower limits of detection were 0.2 mg/dl, range 0.2–25.0 mg/dl, intra- assay and inter assay coefficients of variation (CV) were 0.5 and 1.7%, respectively. | NA | Ferrucci et al. (2000) <sup>34</sup>                                                                                                                                                                                                                                                                                                     |
| INCIPE          | Randomly chosen from the lists of patients of 62 randomly selected general practitioners (GPs) based in four geographical areas in the Veneto region, Northern Italy. | 942 from Northern Italy | none | 992 genotyped individuals (then 50 removed). Disagreement between reported and genotypic sex, one randomly selected member of a pair of first-degree relatives                                                     | From same geographical area                      | UA was measured using the UV uricase method; the between series CV is 1.5%                                                                                                                                                                                                 | NA | Gambaro et al. (2010) <sup>35</sup>                                                                                                                                                                                                                                                                                                      |
| INGI-Carlantino | Population-Based                                                                                                                                                      | 659                     | none | Removed people with call rate <0.95 or too high IBS or heterozygosity. Removed people that did not pass sex chromosome checks or were < 18 years of age.                                                           | Corrected using mixed model regression analysis. | UA was measured with the colorimetric method using Targa 3000 from Biotechnica Instruments.                                                                                                                                                                                | NA | Tepper et al. (2008) <sup>36</sup>                                                                                                                                                                                                                                                                                                       |
| INGI-CILENTO    | Population-Based study with pedigree information                                                                                                                      | 859                     | none | Of the 859 participants who underwent genotyping, none was excluded                                                                                                                                                | none                                             | UA was measured using an enzymatic method.                                                                                                                                                                                                                                 | NA | Ciullo et al. (2006) <sup>37</sup> , Colonna et al. (2007) <sup>38</sup> , Ciullo et al. (2008) <sup>39</sup> , Sala et al. (2008) <sup>40</sup> , Traglia et al. (2009) <sup>41</sup> , Heid et al. (2009) <sup>42</sup> , Colonna et al. (2009) <sup>43</sup> , Bedin et al. (2009) <sup>44</sup> , Siervo et al. (2010) <sup>45</sup> |
| INGI-FVG        | Population-Based                                                                                                                                                      | 1,471                   | none | Removed people with call rate <0.95 or too high IBS or heterozygosity. Removed people that did not pass                                                                                                            | Corrected using mixed model regression analysis. | UA was measured with the colorimetric method using Targa 3000 from Biotechnica                                                                                                                                                                                             | NA | Giroto et al (2011) <sup>46</sup>                                                                                                                                                                                                                                                                                                        |



|                  |                                                                          |                            |      |                                                                                                                                                                                                                                                                                                                                                                                                  |                                                                                                                                |                                                                                                                                                                                                                                                                                                                                 |                                                                                                                                                |                                                                          |
|------------------|--------------------------------------------------------------------------|----------------------------|------|--------------------------------------------------------------------------------------------------------------------------------------------------------------------------------------------------------------------------------------------------------------------------------------------------------------------------------------------------------------------------------------------------|--------------------------------------------------------------------------------------------------------------------------------|---------------------------------------------------------------------------------------------------------------------------------------------------------------------------------------------------------------------------------------------------------------------------------------------------------------------------------|------------------------------------------------------------------------------------------------------------------------------------------------|--------------------------------------------------------------------------|
|                  |                                                                          |                            |      | sex chromosome checks or were < 18 years of age.                                                                                                                                                                                                                                                                                                                                                 |                                                                                                                                | Instruments                                                                                                                                                                                                                                                                                                                     |                                                                                                                                                |                                                                          |
| INGI-Val Borbera | Family Population-based                                                  | 1,665                      | none | Of the 1665 participants who underwent genotyping, we made the following exclusions: sample call rate <95% (n=1)                                                                                                                                                                                                                                                                                 | NA                                                                                                                             | UA was measured using HITACHI 917 ROCHE and Unicel Dx-C 800 BECKMAN                                                                                                                                                                                                                                                             | Gout was defined by self-report at study visit, or intake of gout specific medication                                                          | Traglia et al. (2009) <sup>41</sup>                                      |
| KORA F3          | Population-based                                                         | 1,644                      | none | Only subjects with overall genotyping efficiencies of at least 93% were included. In addition the called gender had to agree with the gender in the KORA study database.                                                                                                                                                                                                                         | none                                                                                                                           | Non-fasting blood samples were obtained from study participants. UA analyses were carried out on fresh samples. UA concentrations were measured using an uricase method (URCA Flex, Dade Behring).                                                                                                                              | Current intake of urate-lowering medication                                                                                                    | Wichmann et al. (2005) <sup>47</sup>                                     |
| KORA F4          | Population-based                                                         | 1,814                      | none | Only subjects with overall genotyping efficiencies of at least 93% were included. In addition the called gender had to agree with the gender in the KORA study database.                                                                                                                                                                                                                         | none                                                                                                                           | Fasting blood samples were obtained from study participants. UA analyses were carried out on fresh samples. UA concentrations were measured using an uricase method (URCA Flex, Dade Behring).                                                                                                                                  | Current intake of urate-lowering medication                                                                                                    | Wichmann et al. (2005) <sup>47</sup>                                     |
| LBC1936          | Retrospective and prospective community-based cohort study <sup>48</sup> | 1,005 of European ancestry | none | Individuals with a disagreement between genetic and reported gender were removed (n=12). Relatedness between subjects was investigated and, for any related pair of individuals, one was removed (PI_HAT (proportion of IBD) > 0.25, n=8). Samples with a call rate $\leq$ 0.95 (n=16), and those showing evidence of non-European descent by multidimensional scaling, were also removed (n=1). | None of the four extracted principal components were associated with uric acid measurements so were not included in the model. | Serum uric acid was determined using the VITROS URIC DT slide method performed using the VITROS URIC DT slide and the VITROS Chemistry products DT Calibrator Kit on VITROS DT60/DT60 II Chemistry systems (VITROS). This was performed at the Combined Biochemistry and Haematology Labs, Western General Hospital, Edinburgh. | Gout was defined by self-report based on the question "Any other disease or health problem?" or evidence of allopurinol in current medication. | Deary et al. (2007) <sup>48</sup> , Houlihan et al. (2010) <sup>49</sup> |

|                                                                |                                 |                            |                                                                                                                                       |                                                                                                                                                                                                                                                             |                                                                               |                                                                                                                                                                                      |                                                                 |                                        |
|----------------------------------------------------------------|---------------------------------|----------------------------|---------------------------------------------------------------------------------------------------------------------------------------|-------------------------------------------------------------------------------------------------------------------------------------------------------------------------------------------------------------------------------------------------------------|-------------------------------------------------------------------------------|--------------------------------------------------------------------------------------------------------------------------------------------------------------------------------------|-----------------------------------------------------------------|----------------------------------------|
| Lifelines Cohort Study                                         | Prospective, population-based   | 3,367 of European ancestry | none                                                                                                                                  | Of the 3900 genotyped individuals, we excluded 533 individuals based on discrepancies with previous genotypes, disagreement between reported and genotypic sex, one randomly selected member of a pair of first-degree relatives, and non-European ancestry | NA                                                                            | Uric acid was measured on a Roche/Hitachi Modular System (Roche Diagnostics GmbH), by the uricase/peroxida enzymatic method                                                          | NA                                                              | Stolk et al. (2008) <sup>50</sup>      |
| London Life Sciences Population (LOLIPOP) study, LOLIPOP_EW610 | Prospective, population-based   | 945                        |                                                                                                                                       | Duplicates, gender discrepancy, contaminated samples, relatedness                                                                                                                                                                                           | The first ten principal components were used as covariates in the regression. | Venous blood was collected into 5.0ml BD Vacutainer SST II Advance tube. Serum urate measurements were measured using the uricase method on Roche/Hitachi Cobas C 501 systems (USA). | NA                                                              |                                        |
| London Life Sciences Population (LOLIPOP) study, LOLIPOP_EW_A  | Prospective, population-based   | 878                        |                                                                                                                                       | Duplicates, contaminated samples, relatedness, samples already in EW610                                                                                                                                                                                     | The first ten principal components were used as covariates in the regression. | Venous blood was collected into 5.0ml BD Vacutainer SST II Advance tube. Serum urate measurements were measured using the uricase method on Roche/Hitachi Cobas C 501 systems (USA). | NA                                                              | Yuan et al. (2008) <sup>51</sup>       |
| London Life Sciences Population (LOLIPOP) study, LOLIPOP_EW_P  | Prospective, population-based   | 1,006                      |                                                                                                                                       | Duplicates, contaminated samples, samples already in EW610 and EW_A                                                                                                                                                                                         | The first ten principal components were used as covariates in the regression. | Venous blood was collected into 5.0ml BD Vacutainer SST II Advance tube. Serum urate measurements were measured using the uricase method on Roche/Hitachi Cobas C 501 systems (USA). | NA                                                              | Kooner et al. (2008) <sup>52</sup>     |
| Ludwigshafen Risk and Cardiovascular Health Study (LURIC)      | Prospective, case-control (CAD) | 963                        | any acute illness other than ACSs, any chronic disease where non-cardiac disease predominated a history of malignancy within the past | Individuals with genotyping call rates below 0.96 were removed.                                                                                                                                                                                             | none                                                                          | UA was measured using a photometric colour test (Harnsäure Farb-Reagenz, Greiner, Germany) on a Hitachi 717 at study entry.                                                          | Gout was defined by the recorded intake of anti-gout medication | Winkelmann et al. (2001) <sup>53</sup> |

|                                                     |                                                                                  |                                    |                                                                                      |                                                                                                                                            |                                                                                                                                                                                                                                               |                                                                                                                                                                                                                                     |                                                                   |                                                                            |
|-----------------------------------------------------|----------------------------------------------------------------------------------|------------------------------------|--------------------------------------------------------------------------------------|--------------------------------------------------------------------------------------------------------------------------------------------|-----------------------------------------------------------------------------------------------------------------------------------------------------------------------------------------------------------------------------------------------|-------------------------------------------------------------------------------------------------------------------------------------------------------------------------------------------------------------------------------------|-------------------------------------------------------------------|----------------------------------------------------------------------------|
|                                                     |                                                                                  |                                    | five years                                                                           |                                                                                                                                            |                                                                                                                                                                                                                                               |                                                                                                                                                                                                                                     |                                                                   |                                                                            |
| MICROS                                              | Cross-sectional, population-based                                                | 1,345                              | none                                                                                 | 1,268 individuals left after QC based on genotyping quality, sex and ancestry check.                                                       | None of the first 3 principal components strongly associated with uric acid but village of origin kept as cofactor; relatedness of participants taken into account using a mixed linear model with the polygenic effect set as random effect. | UA was measured using the uricase /peroxidase method.                                                                                                                                                                               | Self-reported; 39 cases                                           | Pattaro et al. (2007) <sup>54</sup>                                        |
| Netherlands Study of Depression and Anxiety (NESDA) | Longitudinal cohort study of individuals with depressive and/or anxiety disorder | 1,862 of western-European ancestry | Individuals were almost all cases with major depression or anxiety disorder (n=1705) | Ethnic outliers, XO and XXY samples, and samples with a call rate <95%, high genome-wide homo- or heterozygosity, excess IBS were excluded | none                                                                                                                                                                                                                                          | UA was measured by enzymatic colorimetric test (uricase method, Roche Modular system). The coefficients of variation, over the complete measurement period, were 1.6% at a level of 0.25 mmol/l and 1.2% at a level of 0.55 mmol/l. | NA                                                                | Penninx et al. (2008) <sup>55</sup> , Sullivan et al. (2009) <sup>56</sup> |
| NSPHS                                               | Cross-sectional, population-based                                                | 700                                | none                                                                                 | 656 individuals left after QC based on genotyping quality, sex and ancestry check                                                          | None of the first 3 principal components strongly associated with uric acid; relatedness of participants taken into account using a mixed linear model with the polygenic effect set as random effect.                                        | UA was measured using the uricase /peroxidase method.                                                                                                                                                                               | NA                                                                | Igl et al. (2010) <sup>57</sup>                                            |
| ORCADES                                             | Cross-sectional, population-based                                                | 920                                | of non-orcadian ancestry                                                             | 889 individuals left after QC based on genotyping quality, sex and ancestry check.                                                         | None of the first 3 principal components strongly associated with uric acid; relatedness of participants taken                                                                                                                                | UA was measured using the uricase /peroxidase method in the Balfour Hospital, Kirkwall, UK. A subset of 718 samples had also been measured                                                                                          | Gout case based on self-report and medication; less than 50 cases | McQuillan et al. (2008) <sup>58</sup>                                      |

|           |                                             |                            |      |                                                                                                                                                                                                                |                                                                                                                                                |                                                                                                                                                                                         |                                                                                                                                                                                                                    |                                                                         |
|-----------|---------------------------------------------|----------------------------|------|----------------------------------------------------------------------------------------------------------------------------------------------------------------------------------------------------------------|------------------------------------------------------------------------------------------------------------------------------------------------|-----------------------------------------------------------------------------------------------------------------------------------------------------------------------------------------|--------------------------------------------------------------------------------------------------------------------------------------------------------------------------------------------------------------------|-------------------------------------------------------------------------|
|           |                                             |                            |      |                                                                                                                                                                                                                | into account using a mixed linear model with the polygenic effect set as random effect.                                                        | independently in the Institute for Clinical Chemistry and Laboratory Medicine, University Hospital Regensburg, Germany. Pearson correlation between the two urate measurements was 99%. |                                                                                                                                                                                                                    |                                                                         |
| PREVEND   | Prospective, population-based <sup>59</sup> | 4,016 of European ancestry | none | Of the 4,016 genotyped individuals, we excluded 148 individuals based on discrepancies with previous genotypes, disagreement between reported and genotypic sex, first-degree relatives, or outlier based PCA. | none                                                                                                                                           | Uric acid was measured in plasma and urine with the uricase PAP method as described previously (MEGA, Merck, Darmstadt, Germany). <sup>60</sup>                                         | NA                                                                                                                                                                                                                 | Hillege et al. (2002) <sup>59</sup>                                     |
| Procardis | Case-Control study of CAD                   | 3,742                      | none | Dataset was prefiltered for individuals with success rate <95%, ancestry outliers on PCA, heterozygosity, IBC                                                                                                  | Country of Origin was added as a covariate, population stratification was checked using PCA but was not adjusted for beyond Country of Origin. | Measured using uricase method in hospital clinical lab                                                                                                                                  | NA                                                                                                                                                                                                                 | Broadbent et al. (2008) <sup>64</sup>                                   |
| RS-I      | Prospective, population based               | 5,974                      | none |                                                                                                                                                                                                                | none                                                                                                                                           | Serum urate was measured at the baseline visit using a Kone Diagnostica reagent kit and autoanalyzer.                                                                                   | Using a computer network of pharmacies, data on medication prescription use was abstracted from pharmacies in the study region that registers all medication prescriptions beginning January 1, 1991. Participants | Hofman et al. (1991) <sup>62</sup> , Hofman et al. (2009) <sup>63</sup> |

|                |                                                                                                                                                                                         |       |      |      |      |                                                                                                                                                                                                                                                                                       |                                                                                                                                                                                                                                                                                                                              |                                                                                                        |
|----------------|-----------------------------------------------------------------------------------------------------------------------------------------------------------------------------------------|-------|------|------|------|---------------------------------------------------------------------------------------------------------------------------------------------------------------------------------------------------------------------------------------------------------------------------------------|------------------------------------------------------------------------------------------------------------------------------------------------------------------------------------------------------------------------------------------------------------------------------------------------------------------------------|--------------------------------------------------------------------------------------------------------|
|                |                                                                                                                                                                                         |       |      |      |      |                                                                                                                                                                                                                                                                                       | receiving medication (allopurinol, benzbromarone, colchicine, and probenecid) were considered gout cases.                                                                                                                                                                                                                    |                                                                                                        |
| RS-II          | Prospective, population based                                                                                                                                                           | 2,157 | none |      | none | Serum urate was measured at the baseline visit using a Kone Diagnostica reagent kit and autoanalyzer.                                                                                                                                                                                 | Using a computer network of pharmacies, data on medication prescription use was abstracted from pharmacies in the study region that registers all medication prescriptions beginning January 1, 1991. Participants receiving medication (allopurinol, benzbromarone, colchicine, and probenecid) were considered gout cases. | Hofman et al. (1991) <sup>62</sup> , Hofman et al. (2009) <sup>63</sup>                                |
| SardinIA Study | Population-based study in Sardinia. The SardinIA study consists of 6,148 individuals, males and females, ages 14-102 y, that were recruited from a cluster of four towns in the Lanusei | 4,694 | none | none | none | During physical examination, a blood sample was collected in the morning after the participants had been fasting for at least 12 h and after sitting for 15 min and divided into two aliquots. One was used for genomic DNA extraction and the second aliquot to characterize several | Diagnosis of gout was self-report by the participants during anamnesis based on the question "Have you ever been diagnosed with gout?"                                                                                                                                                                                       | Pilia et al. (2006) <sup>64</sup> , Li et al. (2007) <sup>65</sup> , Sanna et al. (2008) <sup>66</sup> |

|                                     |                                                                                                                                    |                            |                                                                                  |                                                                                    |                                                              |                                                                                                                                                                                                                                                                                               |                                                                                                                                                                         |                                                                                                                |
|-------------------------------------|------------------------------------------------------------------------------------------------------------------------------------|----------------------------|----------------------------------------------------------------------------------|------------------------------------------------------------------------------------|--------------------------------------------------------------|-----------------------------------------------------------------------------------------------------------------------------------------------------------------------------------------------------------------------------------------------------------------------------------------------|-------------------------------------------------------------------------------------------------------------------------------------------------------------------------|----------------------------------------------------------------------------------------------------------------|
|                                     | Valley of Sardinia. Samples have been characterized for several quantitative traits and medical conditions, including serum urate. |                            |                                                                                  |                                                                                    |                                                              | blood phenotypes, including evaluation of serum UA. UA (mg/dl) was measured using enzymatic-colorimetric methods (Bayer) The lower limits of detection were 0.2 mg/dl, range 0.2–25.0 mg/dl, intra-assay and inter assay coefficients of variation were equal to 0.5% and 1.7%, respectively. |                                                                                                                                                                         |                                                                                                                |
| Study of Health in Pomerania (SHIP) | Population-based                                                                                                                   | 4,081 of European ancestry | none                                                                             | 24 individuals identified as duplicated or with reported/genotyped gender mismatch | none                                                         | Uricase method, a colorimetric enzymatic method (Uric acid PAP, Boehringer) from non-fasting, fresh serum                                                                                                                                                                                     | Gout was defined by self-report at study visit on the question: Did you have any of the following diseases in the last 12 months? Gout or increased uric acid levels?   | John et al. (2001) <sup>67</sup> , Völzke et al. (2011) <sup>68</sup>                                          |
| SQCCS                               | Colorectal cancer case control study, population-based                                                                             | 2,024                      | none                                                                             | 1,984 individuals after QC, 1,105 of whom had uric acid phenotypes.                | No PCs of ancestry included in analysis                      | UA was measured using the uricase /peroxidase method.                                                                                                                                                                                                                                         | Self-reported information "Up until a year ago had you ever had any other serious illness, chronic condition or mental health condition?". 3 cases. Less than 50 cases. | Tenesa et al. (2008) <sup>69</sup>                                                                             |
| Sorbs                               | Population-based                                                                                                                   | 1,020                      | 46 individuals excluded as they were on a medication that lowers serum uric acid | ethnic outliers, duplicates, and gender mismatches                                 | Estimation of kinship matrix to take account of relatedness. | enzymatic color test (Roche Diagnostics, Inc)                                                                                                                                                                                                                                                 | NA                                                                                                                                                                      | Tönjes et al. (2009) <sup>70</sup> , Tönjes et al. (2010) <sup>71</sup> , Veeramah et al. (2011) <sup>72</sup> |
| TwinsUK                             | Twins                                                                                                                              | 5,654 of European ancestry | none                                                                             | Samples: Exclusion criteria were: (i) sample call rate <98%, (ii) heterozygosity   | Estimation of kinship matrix to take account of              | Ektachem/Vitros system, Johnson & Johnson Clinical                                                                                                                                                                                                                                            | NA                                                                                                                                                                      | Moayyeri et al. (2012) <sup>73</sup>                                                                           |

|                                      |                                                     |                                             |                                                                                         |                                                                                                                                                                                                                                                                                                                          |                                                                                                                     |                                                                                               |                                                                                                                                                                                   |                                                                                                             |
|--------------------------------------|-----------------------------------------------------|---------------------------------------------|-----------------------------------------------------------------------------------------|--------------------------------------------------------------------------------------------------------------------------------------------------------------------------------------------------------------------------------------------------------------------------------------------------------------------------|---------------------------------------------------------------------------------------------------------------------|-----------------------------------------------------------------------------------------------|-----------------------------------------------------------------------------------------------------------------------------------------------------------------------------------|-------------------------------------------------------------------------------------------------------------|
|                                      |                                                     |                                             |                                                                                         | across all SNPs >2 s.d. from the sample mean; (iii) evidence of non-European ancestry as assessed by PCA comparison with HapMap3 populations; (iv) observed pairwise IBD probabilities suggestive of sample identity errors; (v). We corrected misclassified monozygotic and dizygotic twins based on IBD probabilities. | relatedness.                                                                                                        | Diagnostics                                                                                   |                                                                                                                                                                                   |                                                                                                             |
| Women's Genome Health Study          | Prospective, population based                       | 23,294 with verified European ancestry      | none                                                                                    | none                                                                                                                                                                                                                                                                                                                     | No principal component was significant.                                                                             | NA                                                                                            | Gout was defined by self-report on any follow-up questionnaire based on the question "In the past year, have you been diagnosed with gout?" ICD9 codes 274.0, 274.1, 274.8, 274.9 | Ridker et al. (2007) <sup>74</sup>                                                                          |
| Young Finns Study                    | Birth cohort follow-up                              | 2,443 Finns                                 | none                                                                                    | Samples with discrepancy between reported and genotypic sex were excluded. For pairs with $pI_{hat} > 0.2$ one of the pairs was excluded. Individuals with $0.05 < pI_{hat} < 0.2$ to many other individuals were excluded.                                                                                              | none                                                                                                                | Uricase method, a colorimetric enzymatic method (Thermo Fisher Scientific, Vantaa, Helsinki). | NA                                                                                                                                                                                | Raitakari et al. (2008) <sup>75</sup>                                                                       |
| <b>In Silico Replication Studies</b> |                                                     |                                             |                                                                                         |                                                                                                                                                                                                                                                                                                                          |                                                                                                                     |                                                                                               |                                                                                                                                                                                   |                                                                                                             |
| EPIC - cases                         | See description above.                              |                                             |                                                                                         |                                                                                                                                                                                                                                                                                                                          |                                                                                                                     |                                                                                               |                                                                                                                                                                                   |                                                                                                             |
| GSK cases/controls                   | Case-control study for unipolar depressive disorder | 819 cases/851 controls of European ancestry | GSK cases: patients with unipolar recurrent depression, exclusion criteria: presence of | MDS-analysis revealed no outliers (more than 8SD away on any of the first 10 principal components): after QC 819 cases/851 controls.                                                                                                                                                                                     | No principal component was associated with uric acid so none was included as covariates. No principal component was | UA was measured using the uricase method (Roche/Hitachi cobas c system, UA ver.2).            | Information on gout was not obtained.                                                                                                                                             | Lucae et al. (2006) <sup>76</sup> , Kloiber et al. (2010) <sup>77</sup> , Kohli et al. (2011) <sup>78</sup> |

|                                     |                               |                                     |                                                                                                                                                                                                                                                                                           |                                                                                                                                                                                                                                                        |                                                                                              |                                                                                                                                                                                                                                                                                                     |                                                           |                                                                                                          |
|-------------------------------------|-------------------------------|-------------------------------------|-------------------------------------------------------------------------------------------------------------------------------------------------------------------------------------------------------------------------------------------------------------------------------------------|--------------------------------------------------------------------------------------------------------------------------------------------------------------------------------------------------------------------------------------------------------|----------------------------------------------------------------------------------------------|-----------------------------------------------------------------------------------------------------------------------------------------------------------------------------------------------------------------------------------------------------------------------------------------------------|-----------------------------------------------------------|----------------------------------------------------------------------------------------------------------|
|                                     |                               |                                     | manic or hypomanic episodes, mood incongruent psychotic symptoms, lifetime diagnosis of drug abuse and depressive symptoms secondary to alcohol or substance abuse or dependence or to a medical illness or medication GSK controls: exclusion criteria: anxiety and affective disorders. |                                                                                                                                                                                                                                                        | associated with uric acid so none was included as covariate.                                 |                                                                                                                                                                                                                                                                                                     |                                                           |                                                                                                          |
| Gutenberg Health Study (GHS I + II) | Population-based              | 4860 (3422 (GHS I) + 1438 (GHS II)) | age below 35 and above 74                                                                                                                                                                                                                                                                 | Of the 4860 we excluded 685 (426 + 259) based on a call rate less than 97 %, a rate of heterozygosity 3 standard deviations away from the mean, disagreement between reported and genotypic sex, estimated IBD > 0.25, IBS based principal components. | none                                                                                         | UA was measured using the uricase method at study visit during routine measurements. Intra coefficient of variation (CV) was 0% at a mean value of 4.9 mg/dL and 0.44% at a mean value of 9.52 mg/dL, the inter CV% was 2.25% at a mean value of 4.9 mg/dL, and 0.97% at a mean value of 9.4 mg/dL. | NA                                                        | Zeller et al. (2010) <sup>79</sup> , Wild et al. (2010) <sup>80</sup> , Wild et al. (2011) <sup>84</sup> |
| Hunter Community Study (HCS)        | Prospective, population-based | 1,230 of European ancestry          | none                                                                                                                                                                                                                                                                                      | Individuals were excluded for genotype call rate <95%, discrepancies between clinical and inferred gender, one randomly selected member of a pair of first- or second-degree relatives or clear evidence of non-European                               | No principal components were associated with uric acid, and were not included as covariates. | The HAPS pathology service did the urate measurements. They are a NATA accredited lab and meet national standards for quality assurance.                                                                                                                                                            | Gout was defined by self-report use of "Gout medication". | McEvoy et al. (2010) <sup>82</sup>                                                                       |



|                                                           |                                                  |                                |                                                                                                                                                                         |                                                                                                                                                                   |                                                                                                                                                                                  |                                                                                                                             |                                                                                                                       |                                                                                                           |
|-----------------------------------------------------------|--------------------------------------------------|--------------------------------|-------------------------------------------------------------------------------------------------------------------------------------------------------------------------|-------------------------------------------------------------------------------------------------------------------------------------------------------------------|----------------------------------------------------------------------------------------------------------------------------------------------------------------------------------|-----------------------------------------------------------------------------------------------------------------------------|-----------------------------------------------------------------------------------------------------------------------|-----------------------------------------------------------------------------------------------------------|
|                                                           |                                                  |                                |                                                                                                                                                                         | ancestry in Eigenstrat PCA.                                                                                                                                       |                                                                                                                                                                                  |                                                                                                                             |                                                                                                                       |                                                                                                           |
| LifeLines Cohort Study                                    | Prospective, population-based                    | 5,031 of European ancestry     | none                                                                                                                                                                    | none                                                                                                                                                              | NA                                                                                                                                                                               | Uric acid was measured on a Roche/Hitachi Modular System (Roche Diagnostics GmbH), by the uricase/oxidase enzymatic method. | NA                                                                                                                    | Stolk et al. (2008) <sup>50</sup>                                                                         |
| Ludwigshafen Risk and Cardiovascular Health Study (LURIC) | Prospective, case-control (CAD)                  | 1,960                          | any acute illness other than ACSs, any chronic disease where non-cardiac disease predominated a history of malignancy within the past five years                        | Individuals which were part of the discovery analysis were removed. Samples were also removed because of gender discrepancy, relatedness or low call rate (<90%). | Sample HD (Heidelberg) n=1156 and GZ (Graz) n=804 were analyzed separately.                                                                                                      | UA was measured using a photometric colour test (Harnsäure Farb-Reagenz, Greiner, Germany) on a Hitachi 717 at study entry. | Gout was defined by the recorded intake of anti-gout medication                                                       | Winkelmann et al. (2001) <sup>53</sup>                                                                    |
| MARS cases                                                | Case-control study for depressive disorder       | 643 cases of European ancestry | MARS cases: patients with depressive episode, exclusion criteria: depressive disorders caused by a medical or neurologic condition and alcohol or substance dependence. | MDS-analysis revealed 7 outliers (more than 8SD away on any of the first 10 principal components): after QC: 636 cases.                                           | No principal component was associated with uric acid so none was included as covariates. No principal component was associated with uric acid so none was included as covariate. | UA was measured using the uricase method (Roche/Hitachi cobas c system, UA ver.2).                                          | Information on gout was not obtained.                                                                                 | Kohli et al. (2011) <sup>78</sup>                                                                         |
| Oglastra Genetic Park - Talana                            | Population-based study with pedigree information | 860                            | none                                                                                                                                                                    | none                                                                                                                                                              | none                                                                                                                                                                             | Uric acid levels were measured using the uricase method with an automated TARGA BT-3000 Chemistry Analyser                  | Gout was defined by self-report at study visit based on the question "did a doctor ever tell you that you had gout?". | Portas et al. (2010) <sup>83</sup> , Biino et al. (2010) <sup>84</sup> , Tore et al. (2011) <sup>85</sup> |
| Study of Health in Pomerania -                            | Population-based                                 | 986 of European ancestry       | none                                                                                                                                                                    | array call rate < 94%, individuals identified as duplicated or with                                                                                               | none                                                                                                                                                                             | UA was measured from non-fasting, fresh serum. An                                                                           | Gout was defined by self-report at study                                                                              | John et al. (2001) <sup>67</sup> , Völzke et al. (2011) <sup>68</sup>                                     |

|                                                                           |                                                                                            |                                     |                                        |                                                                                                                                                                                                                                         |                                                                         |                                                                                                                                                                                                                                                                                                                                                                                                                 |                                                                                                                              |                                                                                                          |
|---------------------------------------------------------------------------|--------------------------------------------------------------------------------------------|-------------------------------------|----------------------------------------|-----------------------------------------------------------------------------------------------------------------------------------------------------------------------------------------------------------------------------------------|-------------------------------------------------------------------------|-----------------------------------------------------------------------------------------------------------------------------------------------------------------------------------------------------------------------------------------------------------------------------------------------------------------------------------------------------------------------------------------------------------------|------------------------------------------------------------------------------------------------------------------------------|----------------------------------------------------------------------------------------------------------|
| Trend (SHIP-Trend)                                                        |                                                                                            |                                     |                                        | reported/genotyped gender mismatch                                                                                                                                                                                                      |                                                                         | Uricase method was used on a Dimension Vista® System (SIEMENS, Eschborn, Germany). The coefficient of variation was 1.92% at low level of control material (mean value = 291 µmol/L).                                                                                                                                                                                                                           | visit on the question: Did you have any of the following diseases in the last 12 months? Gout or increased uric acid levels? |                                                                                                          |
| Swiss Cohort Study on Air Pollution And Lung and Heart Diseases in Adults | Prospective, population-based                                                              | 1,640                               | asthmatics and non-asthmatics separate | 28 failed genotyping, 35 low call rate (<97%), 17 non-European descent, 64 cryptic relatedness, 26 overlap with ECRHS, 12 males with high X-heterozygosity, 1 sex inconsistency, 13 missing UA levels (=1444 included in this analysis) | Two principal components were included as covariates in the regression. | Uric acid concentrations were determined by a colorimetric uricase/peroxidase method using reagents and the Modular P autoanalyser from Roche diagnostics (Rotkreuz, Switzerland). At concentrations of 203 micromol/l and 355 micromol/l the inter assay imprecision was 1% or less.                                                                                                                           | NA                                                                                                                           | Martin et al. (1997) <sup>86</sup> , Ackermann-Lieblich et al. (2005) <sup>87</sup>                      |
| <b>De Novo Replication Studies</b>                                        |                                                                                            |                                     |                                        |                                                                                                                                                                                                                                         |                                                                         |                                                                                                                                                                                                                                                                                                                                                                                                                 |                                                                                                                              |                                                                                                          |
| HYPerTension in ESTonia (HYPEST)                                          | Hypertensive cases recruited at the clinics and population-based controls <sup>88-90</sup> | 758 of European (Estonian) ancestry | none                                   | none                                                                                                                                                                                                                                    | none                                                                    | The venous blood for serum biomarker analysis was drawn in the morning after an overnight fast <sup>88,90</sup> . UA was measured by standardized assays (Cobas Integra 8000 analytical platform, Roche Diagnostics, Inc.) at the United Laboratories, Tartu University Clinics or at the Diagnostics Division Laboratory, the North Estonia Medical Centre <sup>90</sup> . EURACHEM guidelines were applied to | NA                                                                                                                           | Ong et al. (2011) <sup>88</sup> , Ong et al. (2009) <sup>89</sup> , Juhanson et al. (2008) <sup>90</sup> |

|                                                               |                                                                   |                             |                                       |                                                                                                                                                                                                                                                    |                                                                                                                             |                                                                                                                                                                                                         |                                                                             |                                                                                                             |
|---------------------------------------------------------------|-------------------------------------------------------------------|-----------------------------|---------------------------------------|----------------------------------------------------------------------------------------------------------------------------------------------------------------------------------------------------------------------------------------------------|-----------------------------------------------------------------------------------------------------------------------------|---------------------------------------------------------------------------------------------------------------------------------------------------------------------------------------------------------|-----------------------------------------------------------------------------|-------------------------------------------------------------------------------------------------------------|
|                                                               |                                                                   |                             |                                       |                                                                                                                                                                                                                                                    |                                                                                                                             | estimate measurement uncertainty (9.7%).                                                                                                                                                                |                                                                             |                                                                                                             |
| KORA S2                                                       | Population-based                                                  | 3,685                       | none                                  | Only subjects with overall genotyping efficiencies of at least 93% were included.                                                                                                                                                                  | none                                                                                                                        | Non-fasting blood samples were obtained from study participants. UA analyses were carried out on fresh samples. UA concentrations were measured using an uricase method (Technicon, SMAC AutoAnalyzer). | Current intake of urate-lowering medication                                 | Wichmann et al. (2005) <sup>47</sup>                                                                        |
| Ogliastra Genetic Park                                        | Population-based study with pedigree information                  | 9,704 of Sardinian ancestry | none                                  | Individuals with a call rate <0.9 in de novo genotyping were excluded.                                                                                                                                                                             | Study center was included as covariate in the regression                                                                    | UA was measured in MG/DL units using TARGA 3000 with enzymatic colorimetric uricase method.                                                                                                             | NA                                                                          | Portas et al. (2010) <sup>83</sup> , Biino et al. (2009) <sup>84</sup> , Pistis et al. (2009) <sup>91</sup> |
| <b>Studies with FEUA and UUCR that are not included above</b> |                                                                   |                             |                                       |                                                                                                                                                                                                                                                    |                                                                                                                             |                                                                                                                                                                                                         |                                                                             |                                                                                                             |
| Hercules                                                      | Population based                                                  | 374                         | none                                  | Individuals with call rate below 90% were excluded. The younger of 1st/2nd degree related pairs were removed from the analysis.                                                                                                                    | First two ancestry principal components were used as covariates.                                                            | Uric acid was measured by uricase-PAP (1.0% - 0.5% maximum inter and intra-batch coefficients of variation).                                                                                            | NA                                                                          | Bochud et al. (2009) <sup>92</sup>                                                                          |
| <b>Incident gout studies</b>                                  |                                                                   |                             |                                       |                                                                                                                                                                                                                                                    |                                                                                                                             |                                                                                                                                                                                                         |                                                                             |                                                                                                             |
| Nurses Health Study (NHS)                                     | Gout case-control study nested within a prospective cohort (NHS)  | 2,275 (NHS + HPFS)          | Gout cases and their matched controls | 79 ids from NHS and HPFS together were removed after relatedness check, 76 ids were duplicates and 3 were removed from siblings set with high SNP missingness rate, 69 ids that did not cluster with other self-identified US whites were removed. | The top three principal components of genetic variation were included as covariates in the logistic and linear regressions. | UA was measured using the uricase method (Data not included as this analysis for gout).                                                                                                                 | Gout was defined by the American College of Rheumatology criteria for gout. | Choi et al. (2004) <sup>93</sup> , Choi et al. (2004) <sup>94</sup> , Choi et al. (2008) <sup>95</sup>      |
| Health Professionals Follow-Up Study (HPFS)                   | Gout case-control study nested within a prospective cohort (HPFS) | 2,275 (NHS + HPFS)          | Gout cases and their matched controls | 79 ids from NHS and HPFS together were removed after relatedness check, 76 ids were duplicates and 3 were removed from siblings set with high SNP missingness rate, 69 ids that did not cluster with                                               | The top three principal components of genetic variation were included as covariates in the logistic and linear regressions. | UA was measured using the uricase method (Data not included as this analysis for gout).                                                                                                                 | Gout was defined by the American College of Rheumatology criteria for gout. | Choi et al. (2010) <sup>96</sup> , Choi et al. (2010) <sup>97</sup>                                         |

|                                                                |                               |       |                              |                                                                                             |                                                                               |                                                                                                                                                                                      |                                                                   |                                                                         |
|----------------------------------------------------------------|-------------------------------|-------|------------------------------|---------------------------------------------------------------------------------------------|-------------------------------------------------------------------------------|--------------------------------------------------------------------------------------------------------------------------------------------------------------------------------------|-------------------------------------------------------------------|-------------------------------------------------------------------------|
|                                                                |                               |       |                              | other self-identified US whites were removed.                                               |                                                                               |                                                                                                                                                                                      |                                                                   |                                                                         |
| <b>Study Samples of Indian Ancestry</b>                        |                               |       |                              |                                                                                             |                                                                               |                                                                                                                                                                                      |                                                                   |                                                                         |
| London Life Sciences Population (LOLIPOP) study, LOLIPOP_IA317 | Prospective, population-based | 2,694 | none                         | Duplicates, gender discrepancy, contaminated samples, relatedness, samples already in IA610 | The first ten principal components were used as covariates in the regression. | Venous blood was collected into 5.0ml BD Vacutainer SST II Advance tube. Serum urate measurements were measured using the uricase method on Roche/Hitachi Cobas C 501 systems (USA). | NA                                                                | Chambers et al. (2008) <sup>98</sup>                                    |
| London Life Sciences Population (LOLIPOP) study, LOLIPOP_IA610 | Prospective, population-based | 7,032 | none                         | Duplicates, gender discrepancy, contaminated samples, relatedness                           | The first ten principal components were used as covariates in the regression. | Venous blood was collected into 5.0ml BD Vacutainer SST II Advance tube. Serum urate measurements were measured using the uricase method on Roche/Hitachi Cobas C 501 systems (USA). | NA                                                                | Chambers et al. (2008) <sup>98</sup>                                    |
| London Life Sciences Population (LOLIPOP) study, LOLIPOP_IA_P  | Prospective, population-based | 1,005 | none                         | Duplicates, contaminated samples, samples already in IA610 and IA317                        | The first ten principal components were used as covariates in the regression. | Venous blood was collected into 5.0ml BD Vacutainer SST II Advance tube. Serum urate measurements were measured using the uricase method on Roche/Hitachi Cobas C 501 systems (USA). | NA                                                                | Kooner et al. (2008) <sup>52</sup>                                      |
| <b>Study Samples of African American Ancestry</b>              |                               |       |                              |                                                                                             |                                                                               |                                                                                                                                                                                      |                                                                   |                                                                         |
| ARIC                                                           | Population-based              | 2,749 | not self-identified as black | Data cleaning conducted centrally at the Broad Institute                                    | Adjustment for the first 10 principle components                              | Serum urate concentrations were measured with the uricase method at visit 1                                                                                                          | Gout status was ascertained from a questionnaire at visit 4.      | Iribarren et al. (1996) <sup>6</sup>                                    |
| CARDIA                                                         | Population-based              | 937   | none                         | Data cleaning conducted centrally at the Broad Institute                                    | Adjustment for the first 10 principle components                              | Serum urate was measured at baseline using the uricase method.                                                                                                                       | Gout was self-reported at follow-up visits at 7, 10, and 15 years | Friedman et al. (1988) <sup>14</sup>                                    |
| JHS                                                            | Population-based              | 3,443 | none                         | Data cleaning conducted centrally at the Broad Institute                                    | Adjustment for the first 10 principle components                              | Baseline serum urate was measured using the uricase method.                                                                                                                          | NA                                                                | Taylor et al. (2005) <sup>99</sup> , Fuqua et al. (2005) <sup>100</sup> |
| <b>Study Samples of Japanese Ancestry</b>                      |                               |       |                              |                                                                                             |                                                                               |                                                                                                                                                                                      |                                                                   |                                                                         |

|                           |                                        |                                                                                                |      |                                                                                                                                                                                                                                                                                                                                                              |                                                                                                                                                                       |                                                                                                                          |                                                              |                                                                                                                    |
|---------------------------|----------------------------------------|------------------------------------------------------------------------------------------------|------|--------------------------------------------------------------------------------------------------------------------------------------------------------------------------------------------------------------------------------------------------------------------------------------------------------------------------------------------------------------|-----------------------------------------------------------------------------------------------------------------------------------------------------------------------|--------------------------------------------------------------------------------------------------------------------------|--------------------------------------------------------------|--------------------------------------------------------------------------------------------------------------------|
| The BioBank Japan Project | Disease patients cohort <sup>101</sup> | 15,288 of Japanese disease patients affected with each of the 21 diseases <sup>101-103</sup> . | none | The following subjects were excluded.(i) low call rate (<98%), (ii) in 1st or 2nd kinships, (iii) outliers from East-Asian clusters in the result of principal component analysis (PCA) performed with HapMap Phase II populations, (iv) serum urate, sex, or age were not available, (v) age <18, age > 85, with dialysis treatment or with kidney failure. | Subjects who were determined to be of non-Japanese origin by self-report or by PCA were excluded. No principal component was included as covariate in the regression. | UA levels were obtained from medical records of the medical institutes which participated in the BioBank Japan Projects. | No information on the affection status of gout was obtained. | Nakamura et al. (2007) <sup>101</sup> , Kamatani et al. (2010) <sup>102</sup> , Okada et al. (2011) <sup>103</sup> |
|---------------------------|----------------------------------------|------------------------------------------------------------------------------------------------|------|--------------------------------------------------------------------------------------------------------------------------------------------------------------------------------------------------------------------------------------------------------------------------------------------------------------------------------------------------------------|-----------------------------------------------------------------------------------------------------------------------------------------------------------------------|--------------------------------------------------------------------------------------------------------------------------|--------------------------------------------------------------|--------------------------------------------------------------------------------------------------------------------|

**Supplementary Table 3: Study-specific Genotyping Information**

| Study                | Array type(s)                    | Genotype calling        | QC filters for genotyped SNPs used for imputation              | No of SNPs used for imputation | Imputation    | Imputation Backbone (NCBI build) | Filtering of imputed genotypes | Data management and statistical analysis             | inflation factor overall |
|----------------------|----------------------------------|-------------------------|----------------------------------------------------------------|--------------------------------|---------------|----------------------------------|--------------------------------|------------------------------------------------------|--------------------------|
| AGES Reykjavik Study | Illumina Hu370CNV                | Illumina BeadStudio     | call rate <97%, MAF<1%, pHWE <10E-6                            | 308,340                        | MACH v1.0.16  | HapMap release 22 (build 36)     | none                           | ProbABEL, PLINK, R                                   | 1.05                     |
| Amish                | Affymetrix 500K, Affymetrix 6.0  | BRLMM                   | call rate <95%, MAF<1%, pHWE <10E-6                            | 338,598                        | MACH v1.0.15  | HapMap release 22 (build 36)     | none                           | Measured genotype accounting for polygenic component | 1.03                     |
| ARIC                 | Affymetrix 6.0                   | Birdseed                | call rate <95%, MAF<1%, pHWE <10E-5                            | 669,450                        | MACH v1.0.16  | HapMap release 22 (build 36)     | none                           | ProbABEL, PLINK, R                                   | 1.02                     |
| ASPS                 | Illumina Human 610-Quad BeadChip | Illuminus software      | call rate <97.5%, MAF <1%, , pHWE <1E-6                        | 550,635                        | MACH v1.0.15  | HapMap release 22 (build 36)     | none                           | SPSS, ProbABEL, R                                    | 1.01                     |
| AUSTWIN              | Illumina 370, Illumina 610       | BeadStudio-gencall v3.0 | call rate <95%, MAF <1%, pHWE <10E-5                           | 269,840                        | MACH v1.0.15  | HapMap release 22 (build 36)     | r2 ≥ 0.3                       | MERLIN v1.1.2, PLINK v1.07                           | 1.04                     |
| BLSA                 | Illumina 550K                    | BeadStudio              | call rate <99%, MAF <1%, pHWE < 10E-4                          | 501,704                        | MACH v1.0.16  | HapMap release 22 (build 36)     | none                           | ProbABEL, Merlin                                     | 1.02                     |
| BRIGHT               | Affymetrix 500K                  | CHIAMO                  | call rate <95% (MAF>0.05) and <99% (MAF<0.05), pHWE <5.7E-7    | 490,032                        | IMPUTE        | HapMap release 21 (build 35)     | none                           | SNPTEST                                              | 1.00                     |
| CARDIA               | Affymetrix 6.0                   | BEAGLE, Birdseed        | call rate <95%, MAF<3%, pHWE <10E-4                            | 579,630                        | BEAGLE        | HapMap release 22 (build 36)     | Rsq<0.3, MAF<1%                | ProbABEL, PLINK, R                                   | 1.01                     |
| CHS                  | Illumina 370 CNV                 | Illumina BeadStudio     | Call rate <97%, heterozygotes=0 , pHWE<1E-5, SNP not in HapMap | 306,655                        | BimBam        | HapMap CEU release 22 (build 36) | dosage variance < 0.01         | Linear an logistic regression using R                | 1.01                     |
| CoLaus               | Affymetrix 500K                  | BRLMM                   | call rate <70%, MAF <1%, pHWE <1E-7                            | 390,631                        | IMPUTE v0.2.0 | HapMap release 21 (build 35)     | none                           | Matlab                                               | 1.02                     |
| CROATIA-KORCULA      | 370CNV-Quad                      | BeadStudio              | call rate <98%, MAF <1%, pHWE <10E-6                           | 300,233                        | MACH v1       | HapMap release 22 (build 36)     | none                           | ProbABEL,mmscore argument                            | 0.98                     |

|                               |                                                                        |                                                |                                                                                                                                         |         |                  |                                                                 |      |                                                                        |      |
|-------------------------------|------------------------------------------------------------------------|------------------------------------------------|-----------------------------------------------------------------------------------------------------------------------------------------|---------|------------------|-----------------------------------------------------------------|------|------------------------------------------------------------------------|------|
| CROATIA-SPLIT                 | 370CNV-Quadv3                                                          | GenomeStudio                                   | call rate <98%,<br>MAF <1%, pHWE<br><10E-6                                                                                              | 330,889 | MACH v1          | HapMap<br>release 22<br>(build 36)                              | none | ProbABEL, mmscore<br>argument                                          | 1.01 |
| CROATIA-VIS                   | HumanHap 300v1                                                         | BeadStudio                                     | call rate <97%,<br>MAF <1%, pHWE<br><10E-6                                                                                              | 283,073 | MACH v1          | HapMap<br>release 22<br>(build 36)                              | none | ProbABEL, mmscore<br>argument                                          | 1.00 |
| DESIR                         | Infinium Human1<br>and Hap300<br>BeadArrays                            | Illumina genome<br>studio                      | call rate <95%,<br>MAF <1%, pHWE<br><10E-4                                                                                              | 300,286 | IMPUTE v1        | HapMap<br>release 22<br>(build 36)                              | none | PLINK, R, SNPTEST                                                      | 1.00 |
| EPIC-Norfolk<br>cohort        | Illumina 370CNV<br>/OmniExpress                                        | GenomeStudio                                   | call rate <98%,<br>MAF <1%, pHWE<br><10E-6                                                                                              | 188,473 | IMPUTE<br>v1.0   | HapMap<br>release 22<br>(build 36)                              | none | PLINK, SNPTEST                                                         | 1.01 |
| ERF                           | Affymetrix 500K                                                        | BRLMM                                          | call rate <90%,<br>MAF <1%, pHWE<br><10E-6                                                                                              | 382,037 | IMPUTE<br>v0.3.1 | HapMap<br>release 21<br>(build 35)                              | none | SAS, Stata,<br>EIGENSTRAT, PLINK                                       | 1.03 |
| Estonian<br>Biobank           | Illumina 6k,<br>Illumina 318K,<br>Illumina 370K and<br>Affymetrix 250K | Illumina<br>BeadStudio,<br>BRLMM               | call rate <98%,<br>MAF <1%, pHWE<br><10E-6                                                                                              | 450,877 | MACH<br>v1.0.16  | HapMap<br>release 22<br>CEU (Build<br>36)                       | none | ProbABEL, R,<br>adjustment for<br>family relatedness                   | 1.02 |
| Family Heart<br>Study (FamHS) | Illumina 550K,<br>Illumina 610K,<br>Illumina 1M                        | BeadStudio-<br>gencall v3.0                    | MAF <1%, pHWE<br><1E-6                                                                                                                  | 503,187 | MACH<br>v1.0.16  | HapMap<br>release 22<br>(build 36)                              | none | R                                                                      | 1.01 |
| FHS                           | Affymetrix 500K,<br>Affymetrix 50K<br>supplemental                     | BRLMM                                          | call rate <97%,<br>pHWE <1E-6,<br>Mishap p<1e-9,<br>>100 Mendel<br>errors, MAF <1%,<br>strand mismatch<br>with HapMap, not<br>in HapMap | 378,163 | MACH<br>v1.0.15  | phased CEU<br>haplotypes,<br>HapMap<br>release 22<br>(build 36) | none | kinship, GEE and<br>GWAF packages in R<br>gee() in GEE<br>package in R | 1.03 |
| Health 2000                   | Illumina 610k                                                          | Illuminus                                      | call rate <95%,<br>MAF <1%, pHWE<br><10E-6                                                                                              | 555,388 | MACH<br>v1.0.16  | HapMap<br>release 22<br>(build 36)                              | none | ProbABEL, PLINK, R                                                     | 1.03 |
| InCHIANTI                     | Illumina 550K                                                          | BeadStudio                                     | call rate <98.5%,<br>MAF <1%, pHWE<br><10E-4                                                                                            | 484,115 | MACH<br>v1.0.16  | HapMap<br>release 22<br>(build 36)                              | none | ProbABEL, Merlin                                                       | 1.02 |
| INCIPE                        | Illumina, Infinium<br>DNA Analysis Assay                               | Illuminus                                      | call rate <97%,<br>MAF <1%, pHWE<br><10E-5                                                                                              | 635,654 | IMPUTE v2        | HapMap<br>release 22<br>(build 36)                              | none | SNPTEST                                                                | 1.00 |
| INGI-Carlantino               | Illumina 370CNV                                                        | BeadStudio                                     | call rate <97%,<br>MAF <1%, pHWE<br><10E-6                                                                                              | 298,354 | MACH             | HapMap<br>release 22<br>(build 36)                              | none | GenABEL, ProbABEL                                                      | 1.00 |
| INGI_CILENTO                  | 370K Illumina                                                          | GenomeStudio<br>(HumanCNV370<br>-Quadv3_C.egt) | call rate <95%                                                                                                                          | 299,456 | MACH<br>v1.0.16  | HapMap<br>release 22<br>(build 36)                              | none | GenABEL, ProbABEL,<br>R                                                | 0.99 |
| INGI-FVG                      | Illumina 370CNV                                                        | BeadStudio                                     | call rate <97%,<br>MAF <1%, pHWE                                                                                                        | 306,478 | MACH             | HapMap<br>release 22                                            | none | GenABEL, ProbABEL                                                      | 0.98 |

|                  |                                              |            |                                                                     |         |               |                              |                    |                            |      |
|------------------|----------------------------------------------|------------|---------------------------------------------------------------------|---------|---------------|------------------------------|--------------------|----------------------------|------|
|                  |                                              |            | <10E-6                                                              |         |               | (build 36)                   |                    |                            |      |
| INGI-Val Borbera | Illumina SNP array 370K - HumanCNV370-Quadv3 | BeadStudio | call rate <90%, MAF<1%, pHWE <10E-4                                 | 324,319 | MACH          | HapMap release 22 (build 36) | none               | GenABEL, ProbABEL, R       | 0.99 |
| KORA F3          | Affymetrix 500K                              | BRLMM      | individual call rate <93%                                           | 355,344 | IMPUTE        | HapMap release 21 (build 35) | none               | SNPTEST v2.1.1             | 1.00 |
| KORA F4          | Affymetrix 6.0                               | Birdseed2  | individual call rate <93%                                           | 909,622 | IMPUTE        | HapMap release 22 (build 36) | none               | SNPTEST v2.1.1             | 1.01 |
| LBC1936          | Illumina Human 610_Quadv1                    | Illumina   | call rate <98%, MAF <1%, pHWE <0.001                                | 535,709 | MACH v1.0.16  | HapMap release 22 (build 36) | none               | mach2qtl, R                | 0.99 |
| LifeLines        | Illumina CytoSNP12 V2                        | Illumina   | call rate <95%, MAF <1%, pHWE <10E-5                                | 257,581 | BEAGLE v3.1.0 | HapMap release 23a CEU       | info<0.1, MAF<0.01 | PLINK,Stata                | 1.02 |
| LOLIPOP_EW_A     | Affymetrix 500K                              | BRLMN      | call rate <=90%, MAF <1%, pHWE <=10E-6                              | 374,773 | MACH          | HapMap release 21 (build 35) | none               | mach2qtl                   | 1.00 |
| LOLIPOP_EW_P     | Perlegen custom                              | NA         | call rate <=90%, MAF <1%, pHWE <=10E-6                              | 184,469 | MACH          | HapMap release 21 (build 35) | none               | mach2qtl                   | 1.01 |
| LOLIPOP_EW610    | Illumina Human 610                           | BeadStudio | call rate <=90%, MAF <1%, pHWE <=10E-6                              | 544,620 | MACH          | HapMap release 22 (build 36) | none               | mach2qtl                   | 0.99 |
| LURIC            | Affymetrix 6.0                               | Birdseed   | individual call rate <96%                                           | 866,316 | IMPUTE v0.4.2 | HapMap release 22 (build 36) | none               | SNPTEST v2.1.1             | 1.00 |
| MICROS           | HumanHap_300v2                               | BeadStudio | call rate <98%, MAF <1%, pHWE <10E-6                                | 290,356 | MACH v1       | HapMap release 22 (build 36) | none               | ProbABEL, mmscore argument | 1.00 |
| NESDA            | Perlegen 600K                                | Perlegen   | call rate <95%, MAF 1%, 5% genotype mismatches, 5% Mendelian errors | 435,291 | IMPUTE v0.3.2 | HapMap release 22 (build 36) | Valid p-value      | SNPTEST v2.1.1, R          | 1.02 |
| NSPHS            | HumanHap_300v2                               | BeadStudio | call rate <98%, MAF <1%, pHWE <10E-6                                | 292,220 | MACH v1.0.15  | HapMap release 22 (build 36) | none               | ProbABEL, mmscore argument | 1.00 |
| ORCADES          | most HumanHap 300v2, some 370CNV-Quad        | BeadStudio | call rate <98%, MAF <1%, pHWE <10E-6                                | 293,607 | MACH v1       | HapMap release 22 (build 36) | none               | ProbABEL, mmscore argument | 1.00 |
| PREVEND          | Illumina CytoSNP12 V2                        | Illumina   | call rate <98%, MAF <1%, pHWE <10E-5                                | 244,868 | BEAGLE v3.1.0 | HapMap release 23a CEU       | info<0.1, MAF<0.01 | PLINK,Stata                | 1.05 |



|                            |                                            |                                  |                                                                                       |         |               |                                  |                                            |                                    |      |
|----------------------------|--------------------------------------------|----------------------------------|---------------------------------------------------------------------------------------|---------|---------------|----------------------------------|--------------------------------------------|------------------------------------|------|
| PROCARDIS                  | Illumina 610 & Illumina 1M                 | GenCall (BeadStudio)             | call rate <95%, MAF<1%, pHWE <1E-6                                                    | 487,783 | MACH v1.0.16  | HapMap release 22 (build 36)     | none                                       | STATA 10                           | 1.03 |
| RS-I                       | Version 3 Illumina Infinium II HumanHap550 | BeadStudio                       | call rate <98%, MAF<1%, pHWE <10E-5                                                   | 530,683 | MACH v1.0.15  | HapMap release 22 (build 36)     | none                                       | ProbABEL                           | 1.02 |
| RS-II                      | Version 3 Illumina Infinium II HumanHap550 | BeadStudio                       | call rate <98%, MAF<1%, pHWE <10E-5                                                   | 495,478 | MACH v1.0.15  | HapMap release 22 (build 36)     | none                                       | ProbABEL                           | 1.00 |
| SardinIA                   | Affymetrix 10K, 500K, 6.0                  | BRLMM (10K/500K), Birdseed (6.0) | call rate <90% (10K/500K) and <95% (6.0), MAF<5% (10K/500K) and <1% (6.0), pHWE<10E-6 | 731,209 | MACH v1.0.10  | HapMap release 22 (build 36)     | rsqr<0.3, MAF <1%, Excess Mendelian Errors | Merlin (fastAssoc), R              | 1.05 |
| SHIP                       | Affymetrix 6.0                             | Birdseed v2                      | none                                                                                  | 869,224 | IMPUTE v0.5.0 | HapMap release 22 (build 36)     | none                                       | Caché, InforSense, R, QUICKTEST    | 1.03 |
| SOCCS                      | HumanHap 300v1 and 240S                    | BeadStudio                       | call rate <98%, MAF<1%, pHWE <10E-6                                                   | 512,938 | MACH v1       | HapMap release 22 (build 36)     | none                                       | ProbABEL                           | 1.01 |
| Sorbs                      | Affymetrix 500K Affymetrix 6.0             | BRLMM Birdseed                   | call rate <95%, MAF<1%, pHWE <10E-4                                                   | 378,513 | IMPUTE v1.0.0 | HapMap release 21 (build 35)     | none                                       | GenABEL, ProbABEL                  | 1.02 |
| TwinsUK                    | Illumina 317K+610K+1M                      | Illumina protocol                | call rate <95%, MAF<1%, pHWE <10E-4                                                   | NA      | IMPUTE v2     | HapMap release 24 (build 36)     | none                                       | GenABEL                            | 1.00 |
| WGHS                       | Illumina HumanHap 300 DuoPlus              | Illumina BeadStudio 3.3          | call rate <90%, individual call rate <98%, MAF<1%, pHWE <10E-6                        | 317,186 | MACH v1.0.15  | HapMap CEU release 22 (build 36) | none                                       | SAS 9.1, ProbABEL, R, bash scripts | NA   |
| Young Finns Study          | Illumina 670k                              | Illuminus                        | call rate <95%, MAF<1%, pHWE <10E-6                                                   | 546,677 | MACH v1.0.16  | HapMap release 22 (build 36)     | none                                       | ProbABEL, PLINK, R                 | 1.02 |
| <b>Replication cohorts</b> |                                            |                                  |                                                                                       |         |               |                                  |                                            |                                    |      |
| EPIC cases                 | Illumina 370CNV /OmniExpress               | GenomeStudio                     | call rate <98%, MAF<1%, pHWE <10E-6                                                   | 188,473 | IMPUTE v1.0   | HapMap release 22 (build 36)     | none                                       | PLINK, SNPTTEST                    |      |
| GHS I                      | Affymetrix 6.0                             | Birdseed                         | call rate <95%, MAF<1%, pHWE<10E-4                                                    | 662,405 | IMPUTE v2.1.0 | HapMap release 24 (build 36)     | none                                       | MetABEL, R                         |      |
| GHS II                     | Affymetrix 6.0                             | Birdseed                         | call rate <95%, MAF<1%, pHWE<10E-4                                                    | 673,914 | IMPUTE v2.1.0 | HapMap release 24 (build 36)     | none                                       | MetABEL, R                         |      |

|                                    |                                 |                                     |                                                                                                                 |           |                 |                                                             |                                        |                                 |  |
|------------------------------------|---------------------------------|-------------------------------------|-----------------------------------------------------------------------------------------------------------------|-----------|-----------------|-------------------------------------------------------------|----------------------------------------|---------------------------------|--|
| GSK cases/controls                 | Illumina 550K                   | BeadStudio                          | call rate <98%,<br>pHWE <10E-5                                                                                  | 517,946   | IMPUTE v2       | HapMap3 release #2 (Feb 2009) and 1000g data freeze Mar2010 | none                                   | PLINK, R, GTOOL                 |  |
| HPFS                               | Illumina Infinium Omni Express  | BeadStudio                          | MAF <1%,<br>pHWE <10E-4,<br>genotyping rate <97%                                                                | 553,716   | MACH v1.0.16    | HapMap release 22 (build 36)                                | none                                   | ProbABEL, PLINK, R              |  |
| Hunter Community Study             | Illumina 610K-Quad              | Illumina                            | call rate <95%,<br>MAF <1%, pHWE <10E-6                                                                         | 513,977   | MACH v1.0.16    | HapMap release 24 (build 36.1)                              | MAF <0.01,<br>oevar_imp <0.3           | PLINK, SAS,R                    |  |
| Lifelines replication              | Illumina CytoSNP12 V2           | Illumina                            | call rate <95%,<br>MAF <1%, pHWE <10E-5                                                                         | 257,581   | BEAGLE v3.1.0   | HapMap rel 22 CEU                                           | info <0.1,<br>MAF <0.01                | PLINK, Stata                    |  |
| LURIC_GZ                           | Affy 500k                       | BRLMM                               | call rate <95%,<br>pHWE <10E-6                                                                                  | 393,157   | MACH            | 1000Genomes                                                 | none                                   | SPSS, PLINK                     |  |
| LURIC_HD                           | Affy 6.0                        | Birdseed v2                         | call rate <95%,<br>pHWE <10E-6                                                                                  | 893,909   | MACH            | 1000Genomes                                                 | none                                   | SPSS, PLINK                     |  |
| MARS cases                         | Illumina 100k,300k,610k         | BeadStudio                          | chipwise: call rate <98%,<br>pHWE < 10E-05,<br>over all chips:<br>call rate <98%,<br>MAF < 1%,<br>pHWE < 10E-05 | 327,336   | IMPUTE v2       | HapMap3 release #2 (Feb 2009) and 1000g data freeze Mar2010 | none                                   | PLINK, R, GTOOL                 |  |
| NHS                                | Illumina Infinium Omni Express  | BeadStudio                          | MAF <1%,<br>pHWE <10E-4,<br>genotyping rate <97%                                                                | 553,716   | MACH v1.0.16    | HapMap release 22 (build 36)                                | none                                   | ProbABEL, PLINK, R              |  |
| OGP-Talana                         | Affymetrix 500k                 | BRLMM                               | call rate <93%,<br>MAF <1%, pHWE <10E-5                                                                         | 329,122   | MACH v1.0.16    | HapMap release 22 (build 36)                                | Rsq <0.3                               | R, GenABEL, ProbABEL            |  |
| SAPALDIA                           | Illumina Human610-Quad BeadChip | Gencall                             | only autosomal (excl. sex-chromosomal, mitochondrial)                                                           | 567,589   | MACH v.1.0.16   | HapMap release 22 (build 36)                                | none                                   | ProbABEL, PLINK, Stata          |  |
| SHIP-Trend                         | Illumina Omni 2.5               | GenomeStudio Genotyping Module v1.0 | pHWE ≤ 0.0001, call rate ≤ 90%, monomorphic SNPs                                                                | 1,782,967 | IMPUTE v2.1.2.3 | HapMap release 22 (build 36)                                | duplicate RSID but different positions | Caché, InforSense, R, QUICKTEST |  |
| <b>Samples of other ancestries</b> |                                 |                                     |                                                                                                                 |           |                 |                                                             |                                        |                                 |  |
| LOLIPOP_IA317                      | Illumina HumanHap300K           | BeadStudio                          | call rate ≤ 90%, MAF < 1%,                                                                                      | 245,892   | MACH            | HapMap release 21                                           | none                                   | mach2qtI                        |  |

|                                     |                                               |                                     |                                                     |                    |                |                                                            |                     |                |  |
|-------------------------------------|-----------------------------------------------|-------------------------------------|-----------------------------------------------------|--------------------|----------------|------------------------------------------------------------|---------------------|----------------|--|
|                                     |                                               |                                     | pHWE $\leq 10E-6$                                   |                    |                | (build 35)                                                 |                     |                |  |
| LOLIPOP_IA610                       | Illumina Human610                             | BeadStudio                          | call rate $\leq$ 90%, MAF $<$ 1%, pHWE $\leq 10E-6$ | 544,390            | MACH           | HapMap release 21 (build 35)                               | none                | mach2qtl       |  |
| LOLIPOP_IA_P                        | Perlegen custom                               | Perlegen                            | call rate $\leq$ 90%, MAF $<$ 1%, pHWE $\leq 10E-6$ | 170,055            | MACH           | HapMap release 21 (build 35)                               | none                | mach2qtl       |  |
| CARE Consortium (ARIC, CARDIA, JHS) | Affymetrix 6.0                                | Birdseed v1.33                      | all chip QC + pi_hat 0,05 for rate step             | 763,537 to 846,628 | MACH, 2 rounds | combined CEU+YRI reference panel                           | MAF 1%, rsq_hat 0.3 | plink --dosage |  |
| BioBank Japan                       | Illumina HumanHap610-Quad Genotyping BeadChip | BEADSTUDIO-Genotyping Module v3.3.7 | call rate $<$ 99%, MAF $<$ 1%, pHWE $<$ 10E-7       | 477,784            | MACH v1.0.10   | HapMap Phase II JPT+CHB individuals (release 24, build 36) | none                | R v2.11.0      |  |

**Supplementary Table 4: All SNPs Associated with Serum Urate at  $p < 5 \times 10^{-8}$**

Supplementary Table 4 is provided in a separate .xlsx document.

**Supplementary Table 5: Results from Conditional Analyses to Test Independence**

| SNP               | chr | bp (b36)  | closest gene   | known locus | p-value discovery | effect difference (mg/dl) | s.e. of effect difference | p-value difference | percent change in effect | single SNP analyses |       |         | multiple SNP analyses |       |         | n     |
|-------------------|-----|-----------|----------------|-------------|-------------------|---------------------------|---------------------------|--------------------|--------------------------|---------------------|-------|---------|-----------------------|-------|---------|-------|
|                   |     |           |                |             |                   |                           |                           |                    |                          | effect (mg/dl)      | s.e.  | p-value | effect (mg/dl)        | s.e.  | p-value |       |
| <b>rs1471633</b>  | 1   | 144435096 | <i>PDZK1</i>   | yes         | <b>1.40E-26</b>   | 0.002                     | 0.010                     | 8.3E-01            | 3.3                      | 0.064               | 0.007 | 4.0E-20 | 0.062                 | 0.007 | 9.7E-20 | 69861 |
| <b>rs11264341</b> | 1   | 153418117 | <i>TRIM46</i>  | no          | <b>1.04E-14</b>   | -0.003                    | 0.011                     | 7.6E-01            | 6.9                      | -0.047              | 0.008 | 1.0E-09 | -0.044                | 0.007 | 4.6E-09 | 65167 |
| <b>rs1260326</b>  | 2   | 27584444  | <i>GCKR</i>    | yes         | <b>1.31E-40</b>   | 0.001                     | 0.010                     | 9.0E-01            | 1.8                      | 0.068               | 0.007 | 3.7E-22 | 0.067                 | 0.007 | 1.9E-22 | 69861 |
| <b>rs17050272</b> | 2   | 121022910 | <i>INHBB</i>   | no          | <b>9.36E-09</b>   | -0.003                    | 0.012                     | 8.2E-01            | -6.6                     | 0.041               | 0.008 | 1.0E-06 | 0.044                 | 0.008 | 8.6E-08 | 65167 |
| <b>rs2307394</b>  | 2   | 148432898 | <i>ORC4L</i>   | no          | <b>7.26E-09</b>   | -0.003                    | 0.010                     | 7.9E-01            | 8.2                      | -0.034              | 0.007 | 3.2E-06 | -0.032                | 0.007 | 1.2E-05 | 69861 |
| <b>rs6770152</b>  | 3   | 53075254  | <i>SFMBT1</i>  | no          | <b>2.66E-16</b>   | 0.000                     | 0.010                     | 9.6E-01            | 1.0                      | -0.049              | 0.007 | 1.4E-12 | -0.049                | 0.007 | 6.0E-13 | 69861 |
| <b>rs12498742</b> | 4   | 9553150   | <i>SLC2A9</i>  | yes         | <b>1.2E-786</b>   | 0.028                     | 0.012                     | <b>2.2E-02</b>     | 7.3                      | 0.380               | 0.008 | 0.0E+00 | 0.352                 | 0.009 | 0.0E+00 | 69861 |
| rs6847019         | 4   | 9575347   | <i>SLC2A9</i>  | yes         | <b>2.62E-53</b>   | 0.082                     | 0.013                     | <b>6.3E-11</b>     | <b>78.8</b>              | 0.104               | 0.008 | 7.3E-35 | 0.022                 | 0.009 | 1.8E-02 | 69861 |
| rs11932627        | 4   | 9765275   | <i>WDR1</i>    | yes         | <b>5.59E-11</b>   | -0.039                    | 0.027                     | 1.4E-01            | <b>41.8</b>              | -0.094              | 0.019 | 5.5E-07 | -0.055                | 0.019 | 4.2E-03 | 69861 |
| rs10939829        | 4   | 9909917   | <i>ZNF518B</i> | yes         | <b>4.49E-109</b>  | -0.078                    | 0.012                     | <b>2.7E-10</b>     | <b>57.5</b>              | -0.135              | 0.008 | 5.6E-61 | -0.058                | 0.009 | 3.7E-10 | 69861 |
| <b>rs11099098</b> | 4   | 81388936  | <i>FGF5</i>    | no          | 7.65E-07          | -0.001                    | 0.011                     | 9.4E-01            | 3.8                      | -0.023              | 0.008 | 4.1E-03 | -0.023                | 0.008 | 4.8E-03 | 65167 |
| <b>rs2231142</b>  | 4   | 89271347  | <i>ABCG2</i>   | yes         | <b>4.43E-116</b>  | 0.001                     | 0.017                     | 9.6E-01            | 0.4                      | 0.213               | 0.012 | 8.5E-71 | 0.212                 | 0.012 | 4.9E-67 | 65167 |
| rs17014018        | 4   | 89467059  | <i>PPM1K</i>   | yes         | <b>9.69E-14</b>   | 0.086                     | 0.025                     | <b>7.3E-04</b>     | <b>90.0</b>              | 0.095               | 0.018 | 9.4E-08 | 0.010                 | 0.018 | 6.0E-01 | 65167 |
| <b>rs17632159</b> | 5   | 72467238  | <i>TMEM171</i> | no          | <b>2.00E-09</b>   | 0.002                     | 0.011                     | 8.8E-01            | -6.4                     | -0.025              | 0.008 | 1.4E-03 | -0.027                | 0.008 | 4.9E-04 | 69861 |
| <b>rs675209</b>   | 6   | 7047083   | <i>RREB1</i>   | yes         | <b>1.38E-21</b>   | 0.004                     | 0.011                     | 7.1E-01            | 7.1                      | 0.059               | 0.008 | 1.8E-13 | 0.055                 | 0.008 | 2.2E-12 | 69861 |
| rs969297          | 6   | 25651618  | <i>LRRC16A</i> | yes         | <b>4.86E-08</b>   | -0.024                    | 0.012                     | <b>4.9E-02</b>     | <b>81.0</b>              | -0.029              | 0.008 | 5.3E-04 | -0.006                | 0.009 | 5.2E-01 | 69861 |
| <b>rs1165151</b>  | 6   | 25929595  | <i>SLC17A1</i> | yes         | <b>4.52E-60</b>   | -0.004                    | 0.010                     | 6.5E-01            | 4.8                      | -0.092              | 0.007 | 1.6E-40 | -0.087                | 0.007 | 8.2E-37 | 69861 |
| rs853679          | 6   | 28404842  | <i>ZNF323</i>  | yes         | 9.50E-07          | 0.020                     | 0.015                     | 1.7E-01            | <b>43.9</b>              | 0.046               | 0.010 | 8.4E-06 | 0.026                 | 0.010 | 1.3E-02 | 69861 |
| rs9262499         | 6   | 31095077  | <i>MUC21</i>   | yes         | 5.96E-07          | -0.010                    | 0.010                     | 3.3E-01            | <b>29.9</b>              | -0.034              | 0.007 | 4.1E-06 | -0.024                | 0.007 | 1.1E-03 | 69861 |
| <b>rs729761</b>   | 6   | 43912549  | <i>VEGFA</i>   | no          | <b>3.05E-12</b>   | -0.001                    | 0.011                     | 9.2E-01            | 2.3                      | -0.047              | 0.008 | 6.1E-09 | -0.046                | 0.008 | 5.6E-09 | 69861 |
| <b>rs1178977</b>  | 7   | 72494985  | <i>BAZ1B</i>   | no          | <b>6.68E-12</b>   | 0.010                     | 0.013                     | 4.5E-01            | <b>20.7</b>              | 0.046               | 0.009 | 3.1E-07 | 0.036                 | 0.009 | 2.9E-05 | 69861 |
| <b>rs10480300</b> | 7   | 151036938 | <i>PRKAG2</i>  | no          | 9.37E-07          | -0.002                    | 0.011                     | 8.8E-01            | -6.3                     | 0.027               | 0.008 | 4.7E-04 | 0.029                 | 0.008 | 1.4E-04 | 69861 |
| <b>rs17786744</b> | 8   | 23832951  | <i>STC1</i>    | no          | 8.82E-08          | 0.003                     | 0.010                     | 8.0E-01            | -10.3                    | -0.024              | 0.007 | 5.5E-04 | -0.027                | 0.007 | 9.1E-05 | 69861 |

|            |    |           |                 |     |                 |        |       |         |             |        |       |         |        |       |         |       |
|------------|----|-----------|-----------------|-----|-----------------|--------|-------|---------|-------------|--------|-------|---------|--------|-------|---------|-------|
| rs2941484  | 8  | 76641323  | <i>HNF4G</i>    | no  | <b>3.91E-17</b> | -0.001 | 0.010 | 9.6E-01 | -1.1        | 0.046  | 0.007 | 7.7E-11 | 0.046  | 0.007 | 1.3E-11 | 69861 |
| rs10813960 | 9  | 33170362  | <i>B4GALT1</i>  | no  | 7.85E-07        | -0.003 | 0.011 | 8.0E-01 | 7.3         | -0.038 | 0.008 | 1.8E-06 | -0.035 | 0.008 | 5.6E-06 | 69861 |
| rs10821905 | 10 | 52316099  | <i>A1CF</i>     | no  | <b>3.45E-12</b> | -0.003 | 0.013 | 8.3E-01 | -5.7        | 0.049  | 0.009 | 1.2E-07 | 0.052  | 0.009 | 9.4E-09 | 69861 |
| rs11711614 | 10 | 61139544  | <i>SLC16A9</i>  | yes | <b>6.48E-23</b> | -0.009 | 0.014 | 5.3E-01 | 12.0        | -0.073 | 0.010 | 7.1E-14 | -0.064 | 0.010 | 5.2E-11 | 65167 |
| rs2090123  | 10 | 61195573  | <i>CCDC6</i>    | yes | <b>1.26E-08</b> | 0.017  | 0.011 | 1.1E-01 | <b>49.9</b> | 0.034  | 0.008 | 4.9E-06 | 0.017  | 0.008 | 2.2E-02 | 65167 |
| rs1493664  | 11 | 25657565  | <i>LUZP2</i>    | no  | 8.27E-07        | 0.002  | 0.010 | 8.5E-01 | -7.1        | -0.027 | 0.007 | 2.1E-04 | -0.029 | 0.007 | 4.3E-05 | 65167 |
| rs2078267  | 11 | 64090690  | <i>SLC22A11</i> | yes | <b>8.73E-36</b> | 0.002  | 0.010 | 8.6E-01 | -2.1        | -0.087 | 0.007 | 2.6E-34 | -0.089 | 0.007 | 2.9E-37 | 69861 |
| rs478607   | 11 | 64234639  | <i>NRXN2</i>    | yes | <b>5.31E-10</b> | 0.004  | 0.013 | 7.7E-01 | -10.0       | -0.039 | 0.010 | 4.9E-05 | -0.043 | 0.009 | 4.6E-06 | 69861 |
| rs642803   | 11 | 65317196  | <i>OVOL1</i>    | no  | <b>4.51E-14</b> | -0.006 | 0.010 | 5.5E-01 | 16.2        | -0.036 | 0.007 | 3.1E-07 | -0.030 | 0.007 | 1.1E-05 | 69861 |
| rs2195525  | 11 | 118740614 | <i>USP2</i>     | no  | 2.59E-07        | -0.001 | 0.010 | 9.0E-01 | 3.3         | -0.040 | 0.008 | 8.6E-08 | -0.039 | 0.007 | 1.1E-07 | 69861 |
| rs3741414  | 12 | 56130316  | <i>INHBC</i>    | yes | <b>9.79E-22</b> | 0.003  | 0.012 | 7.9E-01 | -4.7        | -0.068 | 0.009 | 7.7E-15 | -0.071 | 0.009 | 6.7E-17 | 69861 |
| rs653178   | 12 | 110492139 | <i>ATXN2</i>    | no  | <b>2.45E-10</b> | -0.001 | 0.010 | 9.5E-01 | 1.5         | -0.039 | 0.007 | 3.3E-08 | -0.038 | 0.007 | 2.2E-08 | 69861 |
| rs584480   | 13 | 71243506  | <i>DACH1</i>    | no  | 2.91E-07        | 0.002  | 0.010 | 8.8E-01 | -6.7        | -0.022 | 0.007 | 1.9E-03 | -0.024 | 0.007 | 6.3E-04 | 69861 |
| rs10851850 | 15 | 70273563  | <i>GRAMD2</i>   | no  | 8.33E-07        | -0.006 | 0.011 | 5.8E-01 | <b>23.3</b> | -0.027 | 0.008 | 4.6E-04 | -0.021 | 0.008 | 1.1E-02 | 69861 |
| rs4777542  | 15 | 70869419  | <i>ADPGK</i>    | no  | 1.46E-07        | -0.010 | 0.011 | 3.9E-01 | <b>28.6</b> | -0.034 | 0.008 | 8.6E-06 | -0.025 | 0.008 | 3.0E-03 | 65282 |
| rs1394125  | 15 | 73946038  | <i>UBE2Q2</i>   | no  | <b>9.78E-11</b> | 0.006  | 0.011 | 5.8E-01 | 15.2        | 0.041  | 0.008 | 4.1E-07 | 0.035  | 0.008 | 1.0E-05 | 65167 |
| rs6598541  | 15 | 97088658  | <i>IGF1R</i>    | no  | <b>5.20E-13</b> | -0.002 | 0.010 | 8.5E-01 | -5.5        | 0.036  | 0.007 | 9.4E-07 | 0.038  | 0.007 | 1.1E-07 | 69861 |
| rs7193778  | 16 | 68121391  | <i>NFAT5</i>    | no  | <b>2.36E-08</b> | -0.002 | 0.014 | 8.8E-01 | 4.1         | -0.054 | 0.010 | 1.3E-07 | -0.052 | 0.010 | 2.0E-07 | 69861 |
| rs7188445  | 16 | 78292488  | <i>MAF</i>      | no  | 1.15E-07        | -0.003 | 0.010 | 7.6E-01 | 9.1         | -0.034 | 0.007 | 4.5E-06 | -0.031 | 0.007 | 1.8E-05 | 69861 |
| rs7224610  | 17 | 50719787  | <i>HLF</i>      | no  | <b>4.74E-11</b> | 0.002  | 0.010 | 8.6E-01 | -4.3        | -0.042 | 0.007 | 4.3E-09 | -0.044 | 0.007 | 3.1E-10 | 69861 |
| rs2079742  | 17 | 56820479  | <i>BCAS3</i>    | no  | <b>6.24E-09</b> | 0.000  | 0.015 | 9.8E-01 | 0.8         | 0.036  | 0.011 | 6.7E-04 | 0.035  | 0.010 | 5.5E-04 | 69861 |
| rs164009   | 17 | 71795264  | <i>QRICH2</i>   | no  | 7.06E-07        | -0.001 | 0.010 | 9.4E-01 | -2.8        | 0.025  | 0.007 | 3.4E-04 | 0.026  | 0.007 | 1.6E-04 | 69861 |
| rs1035942  | 19 | 7150803   | <i>INSR</i>     | no  | 2.24E-07        | -0.001 | 0.011 | 9.6E-01 | -1.9        | 0.031  | 0.008 | 8.6E-05 | 0.031  | 0.008 | 4.0E-05 | 69861 |

Horizontal lines separate different loci. Single SNP and multiple SNP analyses were performed using the same sample size (n). Legend of bold entries: SNP is bold if lead SNP of locus, thus taken forward to replication stage. P-value discovery is bold if genome-wide significant. P-values for difference between effects from single SNP and multiple SNP models are bold if nominally significant. Percent change of the difference in effect estimates between the single and the multiple SNP model compared to the single SNP model are bold if >20.

Abbreviations: s.e.: standard error; n: sample size.

**Supplementary Table 6: Separate Results from Discovery, Replication and Combined Analyses for SNP-Urate Associations**

Supplementary Table 6 is provided in a separate .xlsx document.

**Supplementary Table 7: Characterization of Implicated Loci: Gene Function and Investigations in the NHGRI GWAS Catalog and a Serum Metabolite Database**

| Signal type | Sentinel rsID | Recombinant interval chr and start and end position (b36) <sup>1</sup> | Core gene <sup>2</sup> | Other genes in recomb. interval <sup>3</sup>                                                                                                                                                                                                                                                                                                   | Core gene function                                                                                                                                                                                                                                                                                                                                                                                                                                                                                                                                                                                                      | gene expression: transcript, protein <sup>4</sup>                                                                                                                                                                                                                   | Human disease mutations (OMIM database)            | Associations with complex traits from the human GWAS catalog ( $r^2 > 0.5$ ) <sup>5</sup>                              | Metabolites associated with index SNP ( $p < 5 \times 10^{-6}$ ) |
|-------------|---------------|------------------------------------------------------------------------|------------------------|------------------------------------------------------------------------------------------------------------------------------------------------------------------------------------------------------------------------------------------------------------------------------------------------------------------------------------------------|-------------------------------------------------------------------------------------------------------------------------------------------------------------------------------------------------------------------------------------------------------------------------------------------------------------------------------------------------------------------------------------------------------------------------------------------------------------------------------------------------------------------------------------------------------------------------------------------------------------------------|---------------------------------------------------------------------------------------------------------------------------------------------------------------------------------------------------------------------------------------------------------------------|----------------------------------------------------|------------------------------------------------------------------------------------------------------------------------|------------------------------------------------------------------|
| overall     | rs1471633     | 1 144433813<br>144833808                                               | <i>PDZK1</i>           | <i>PDZK1P1</i><br><i>GPR89C-NBPF1#</i><br><i>GPR89A</i>                                                                                                                                                                                                                                                                                        | This gene encodes a PDZ domain-containing scaffolding protein; these molecules bind to and mediate the subcellular localization of target proteins. PDZK1 has been shown to interact with several members of the Solute carrier family such as SLC22A12 and SLC17A1 both of which are detected in this study. PDZK1 may be involved in the coordination of a diverse range of regulatory processes for ion transport and second messenger cascades, and in the regulation of proximal tubular Na(+)-dependent inorganic phosphate cotransport, therefore playing an important role in tubular function (By similarity). | The <i>PDZK1</i> transcript is predominantly detected in kidney and liver; expression is also detected in ovary, colon, breast, small intestine, endometrium, exocrine pancreas. Protein staining is observed in many tissues, strong in kidney and GI tract (HPA). | none                                               | Serum uric acid (rs12129861, Kolz M et al.), Serum urate (rs1967017, Yang Q et al.)                                    |                                                                  |
| overall     | rs11264341    | 1 153367551<br>154105051                                               | <i>TRIM46</i>          | <i>RAG1AP1</i><br><i>SCAMP3</i> <i>RUSC1</i><br><i>MUC1</i> <i>SYT11</i><br><i>GBAP</i> <i>YY1AP1</i><br><i>GON4L</i> <i>ASH1L</i><br><i>C1orf104</i> <i>HCN3</i><br><i>DAP3</i> <i>MTX1</i><br><i>DPM3</i> <i>GBA</i><br><i>KRTCAP2</i> <i>MSTO1</i><br><i>FDPS</i> <i>CLK2</i><br><i>EFNA1</i> ( <i>PKLR</i> )<br><i>THBS3</i> <i>C1orf2</i> | The <i>TRIM46</i> gene product contains a motif associated with binding to microtubules <sup>104</sup> , otherwise little is known.                                                                                                                                                                                                                                                                                                                                                                                                                                                                                     | <i>TRIM46</i> is transcribed around median levels in most tissues (GeneAtlas). The protein is expressed in liver (HPRD).                                                                                                                                            | none                                               | Esophageal cancer and gastric cancer (rs4072037, Abnet CC et al.), Serum magnesium levels (rs4072037, Meyer TE et al.) |                                                                  |
|             |               |                                                                        | <i>PKLR</i>            |                                                                                                                                                                                                                                                                                                                                                | Encodes the liver and erythrocyte specific isozymes of the glycolytic enzyme that catalyzes conversion of phosphoenolpyruvate and ADP to pyruvate and ATP. ATP is one of the main precursors of uric acid.                                                                                                                                                                                                                                                                                                                                                                                                              | Pyruvate kinase, liver and red blood cell, is highly expressed in liver and endothelial cells, and to a lesser degree in kidney (BioGPS). The protein is found in liver and several other tissues (HPRD).                                                           | Pyruvate deficiency of erythrocytes (#266200)      |                                                                                                                        |                                                                  |
| overall     | rs1260326     | 2 27240853<br>27706353                                                 | <i>GCKR</i>            | <i>TRIM54</i><br><i>DNAJC5G</i> <i>FTHL3</i><br><i>SLC30A3</i> <i>PPM1G</i><br><i>EIF2B4</i> <i>CAD</i>                                                                                                                                                                                                                                        | <i>GCKR</i> encodes a protein belonging to the GCKR subfamily of the SIS (Sugar Isomerase) family of proteins. The gene product is a regulatory protein that inhibits                                                                                                                                                                                                                                                                                                                                                                                                                                                   | The <i>GCKR</i> transcript is principally expressed in liver (BioGPS). Protein is found in liver and                                                                                                                                                                | This gene is considered a candidate susceptibility | Triglycerides (rs1260333, Waterworth DM et al.), Triglycerides-Blood Pressure (TG-BP)                                  |                                                                  |



|         |            |             |              |                                                                                                                                                                                                       |                                                                                                                        |                        |                                                                                                                                                                                                                  |                                                                                                                                                                                                                                                                                                                                                                                                                                                                                                                                                                                                                                                                                                                                                                                                                                                                                                                                                                                                                                                                                                                                          |  |
|---------|------------|-------------|--------------|-------------------------------------------------------------------------------------------------------------------------------------------------------------------------------------------------------|------------------------------------------------------------------------------------------------------------------------|------------------------|------------------------------------------------------------------------------------------------------------------------------------------------------------------------------------------------------------------|------------------------------------------------------------------------------------------------------------------------------------------------------------------------------------------------------------------------------------------------------------------------------------------------------------------------------------------------------------------------------------------------------------------------------------------------------------------------------------------------------------------------------------------------------------------------------------------------------------------------------------------------------------------------------------------------------------------------------------------------------------------------------------------------------------------------------------------------------------------------------------------------------------------------------------------------------------------------------------------------------------------------------------------------------------------------------------------------------------------------------------------|--|
|         |            |             |              | <p><i>CCDC121 UCN</i><br/> <i>FNDC4 XAB1</i><br/> <i>C2orf16 ZNF512</i><br/> <i>NRBP1 SNX17</i><br/> <i>KRTCAP3</i><br/> <i>ZNF513 C2orf28</i><br/> <i>IFT172 MPV17</i><br/> <i>GTF3C2 SLC5A6</i></p> | glucokinase in liver and pancreatic islet cells by binding non-covalently to form an inactive complex with the enzyme. | pancreas.              | <p>gene for a form of maturity-onset diabetes of the young (MODY)<sup>108</sup>. Heterozygous inactivating GCK mutations cause hyperglycemia, whereas activating mutations cause hypoglycemia<sup>108</sup>.</p> | <p>(rs780093, Kraja AT et al.), Waist Circumference - Triglycerides (WC-TG) (rs780093, Kraja AT et al.), Crohn's disease (rs780093, Franke A et al.), Serum urate (rs780093, Yang Q et al.), Serum calcium (rs780093, O'Seaghda CM et al.), C-reactive protein (rs1260326, Dehghan A et al.), Hypertriglyceridemia (rs1260326, Johansen CT et al.), Chronic kidney disease (rs1260326, Köttgen A et al.), Hematological and biochemical traits (rs1260326, Kamatani Y et al.), Two-hour glucose challenge (rs1260326, Saxena R et al.), Triglycerides (rs1260326, Kathiresan S et al.), Other metabolic traits (rs1260326, Sabatti C et al.), Waist circumference and related phenotypes (rs1260326, Chambers JC et al.), Fasting glucose-related traits (rs780094, Dupuis J et al.), Fasting insulin-related traits (rs780094, Dupuis J et al.), Serum uric acid (rs780094, Kolz M et al.), Triglycerides (rs780094, Aulchenko YS et al.), C-reactive protein (rs780094, Ridker PM et al.), Triglycerides (rs780094, Kathiresan S et al.), Triglycerides (rs780094, Willer CJ et al.), LDL cholesterol (rs780094, Wallace C et al.)</p> |  |
| overall | rs17050272 | 2 120770240 | <i>INHBB</i> | <i>GLI2</i>                                                                                                                                                                                           | Activin B, consisting of two inhibin betaB                                                                             | Transcript is found at | none                                                                                                                                                                                                             |                                                                                                                                                                                                                                                                                                                                                                                                                                                                                                                                                                                                                                                                                                                                                                                                                                                                                                                                                                                                                                                                                                                                          |  |

|         |            |                          |        |                                         |                                                                                                                                                                                                                                                                                                                                                                                                                                                                                                                                                                                                   |                                                                                                                                                                                                                                                                                                                       |                         |                                                             |                   |
|---------|------------|--------------------------|--------|-----------------------------------------|---------------------------------------------------------------------------------------------------------------------------------------------------------------------------------------------------------------------------------------------------------------------------------------------------------------------------------------------------------------------------------------------------------------------------------------------------------------------------------------------------------------------------------------------------------------------------------------------------|-----------------------------------------------------------------------------------------------------------------------------------------------------------------------------------------------------------------------------------------------------------------------------------------------------------------------|-------------------------|-------------------------------------------------------------|-------------------|
|         |            | 121323240                |        |                                         | (INHBB) subunits, is a hormone with effects on gonadal function, reproduction and fetal development. It may play a role in physiological energy balance and has been found to inhibit lipolysis <sup>107,108</sup> . Activins bind to the ACVR2A receptor, the encoding gene of which is also found in our study.                                                                                                                                                                                                                                                                                 | high levels in testis and prostate (BioGPS). The protein is highly detected in kidney, liver and gallbladder (HPA).                                                                                                                                                                                                   |                         |                                                             |                   |
| overall | rs2307394  | 2 148171238<br>148676238 | ORC4L  | (ACVR2A) MBD5                           | The origin recognition complex subunit 4 gene ( <i>ORC4L</i> ) encodes a subunit of a complex necessary for DNA replication.                                                                                                                                                                                                                                                                                                                                                                                                                                                                      | The transcript as well as the protein is found ubiquitously (BioGPS and HPRD).                                                                                                                                                                                                                                        | none                    |                                                             |                   |
|         |            |                          | ACVR2A |                                         | The <i>ACVR2A</i> gene encodes an activin A type II receptor, which has protein kinase activity. Type I and II receptors form a complex; type II is required for ligand binding. <i>ACVR2A</i> can bind activin A, B (encoded by <i>INHBB</i> and also found in our screen) or AB as well as inhibin A (UniProt, STRING) at high affinity. There is a HNF-1A transcription factor, also found in our screen, binding site in the <i>ACVR2A</i> gene promoter (GeneCards). The associated SNP, rs2307394, is an eQTL for the <i>ACVR2A</i> transcript in several tissues (Supplementary Table 14). | The <i>ACVR2A</i> transcript is expressed around median levels in most tissues (BioGPS).                                                                                                                                                                                                                              | none                    |                                                             |                   |
| overall | rs6770152  | 3 52805000<br>53152000   | SFMBT1 | RFT1 (MUSTN1)<br>ITIH4 ITIH3<br>TMEM110 | <i>SFMBT1</i> shares high similarity with the <i>Drosophila</i> Scm (sex comb on midleg) gene. It encodes a protein which contains four malignant brain tumor repeat (mbt) domains and may be involved in antigen recognition. Several alternative splice variants that encode the same protein have been characterized [provided by RefSeq].                                                                                                                                                                                                                                                     | The <i>SFMBT1</i> transcript is expressed in most tissues around the median level, with substantially higher expression in testis. Staining is strong in hematopoietic, liver and pancreas, lung, GI tract, female and male tissues, urinary tract and endocrine tissues (HPA). Protein is found ubiquitously (HPRD). | none                    |                                                             |                   |
|         |            |                          | MUSTN1 |                                         | <i>MUSTN1</i> encodes the musculoskeletal, embryonic nuclear protein 1, which may be involved in the development and regeneration of the musculoskeletal system [UniProt]. Evidence supports a role of the <i>MUSTN1</i> transcript in the regulation of chondrocyte function in vitro <sup>109</sup> and in vivo <sup>110</sup> .                                                                                                                                                                                                                                                                | No expression data is available for the <i>MUSTN1</i> transcript. Protein is found in many diverse tissues (HPRD).                                                                                                                                                                                                    | none                    |                                                             |                   |
| overall | rs12498742 | 4 9523329<br>10025829    | SLC2A9 | WDR4                                    | <i>SLC2A9</i> encodes GLUT9, a high-affinity urate transporter involved in renal urate reabsorption <sup>111,112</sup> . Two isoforms encoded                                                                                                                                                                                                                                                                                                                                                                                                                                                     | The <i>SLC2A9</i> transcript is expressed in most tissues around the                                                                                                                                                                                                                                                  | Renal hypouricemia (MIM | Serum urate (rs16890979, Dehghan A et al.), Serum uric acid | urate (p=1.6E-17) |

|         |            |                        |                |                |                                                                                                                                                                                                                                                                                                                                                                                                                                                        |                                                                                                                                                                                                                                                                                |                                      |                                                                                                                                                                                                                                                                                                                                                                                              |  |
|---------|------------|------------------------|----------------|----------------|--------------------------------------------------------------------------------------------------------------------------------------------------------------------------------------------------------------------------------------------------------------------------------------------------------------------------------------------------------------------------------------------------------------------------------------------------------|--------------------------------------------------------------------------------------------------------------------------------------------------------------------------------------------------------------------------------------------------------------------------------|--------------------------------------|----------------------------------------------------------------------------------------------------------------------------------------------------------------------------------------------------------------------------------------------------------------------------------------------------------------------------------------------------------------------------------------------|--|
|         |            |                        |                |                | by different transcript variants have been described: one encoding for a transporter responsible for transporting urate from tubular cells to the peritubular interstitium following the uptake of urate from the luminal space by <i>SLC22A12</i> <sup>113</sup> , and the other encoding a transporter responsible for urate uptake from the luminal space into the tubular cells.                                                                   | median level, with higher levels of expression in kidney (~2 fold) and CD33 myeloid cells (~4 fold). Protein is found in articular cartilage, brain, chondrocyte, colon, heart, kidney, leukocyte, liver, lung, ovary, placenta, prostate, skeletal muscle, and testis (HPRD). | #612076) <sup>113, 114</sup> .       | (rs16890979, McArdle PF et al.), Serum urate (rs13129697, Yang Q et al.), Biochemical measures (rs13129697, Zemunik T et al.), Serum urate (rs737267, Vitart V et al.), Serum uric acid (rs734553, Kolz M et al.), Serum urate (rs6855911, Li S et al.), Serum uric acid (rs3775948, Charles BA et al.), Serum urate (rs7442295, Döring A et al.), Serum urate (rs7442295, Wallace C et al.) |  |
| overall | rs11099098 | 4 81375845<br>81427845 | <i>FGF5</i>    |                | The protein encoded by this gene is a member of the fibroblast growth factor (FGF) family. FGF family members possess broad mitogenic and cell survival activities, and are involved in a variety of biological processes, including embryonic development, cell growth, morphogenesis, tissue repair, tumor growth and invasion. This gene was identified as an oncogene, which confers transforming potential when transfected into mammalian cells. | The <i>FGF5</i> transcript is expressed in most tissues around the median level. Protein cytoplasmic immunoreactivity is moderate in most normal tissues. Strong cytoplasmic staining was observed in placenta, thyroid gland and pyramidal neurons.                           | none                                 | Diastolic blood pressure (rs16998073, Newton-Cheh C et al.)                                                                                                                                                                                                                                                                                                                                  |  |
| overall | rs2231142  | 4 89179845<br>89283345 | <i>ABCG2</i>   | <i>PKD2</i>    | The gene encodes an ABC transporter, ABCG2. ABCG2 transports drugs such as chemotherapeutics. It has been shown to operate as an urate transporter, which contributes to urate excretion via the kidney. The rs2231142 variant encodes the Q141K mutation, a partial loss-of-function variant that increases susceptibility for hyperuricemia and gout <sup>115,116</sup> .                                                                            | The transcript is highly expressed in placenta and small intestine (Gene Atlas); the protein localizes to the plasma membrane of multiple tissues (HPRD).                                                                                                                      | Blood group Junior(a-) (MIM #614490) | Serum uric acid (rs2231142, Kolz M et al.), Serum urate (rs2231142, Dehghan A et al.), Serum urate (rs2199936, Yang Q et al.)                                                                                                                                                                                                                                                                |  |
| overall | rs17632159 | 5 72460000<br>72500500 | <i>TMEM171</i> | <i>TMEM174</i> | <i>TMEM171</i> encodes for an as yet uncharacterized transmembrane protein. The related <i>TMEM174</i> which is in the same LD interval is highly expressed in kidney tissue and has been proposed to enhance the activity of AP1, a transcription factor induced by a broad range of signals including stress and growth factors <sup>117</sup> .                                                                                                     | The <i>TMEM171</i> protein is expressed in most tissues around the median level, with higher levels of expression in thyroid. Staining was strong in lung and female tissue (HPA).                                                                                             | none                                 |                                                                                                                                                                                                                                                                                                                                                                                              |  |
| overall | rs675209   | 6 6933500<br>7213000   | <i>RREB1</i>   |                | The protein encoded by <i>RREB1</i> is a zinc finger transcription factor that binds to RAS-responsive elements (RREs) of gene                                                                                                                                                                                                                                                                                                                         | The <i>RREB1</i> transcript is expressed in most tissues around the                                                                                                                                                                                                            | none                                 | Age-related macular degeneration (rs11755724, Neale BM                                                                                                                                                                                                                                                                                                                                       |  |

|         |           |                        |         |                                                                                                                                                                                                                                                                                                                                                                                                            |                                                                                                                                                                                                                                                                                                                                                                                                                                                                                                                                                                                                                                           |                                                                                                                                                                                                                                                                                                            |                                                                   |                                                                                                                               |                                                         |
|---------|-----------|------------------------|---------|------------------------------------------------------------------------------------------------------------------------------------------------------------------------------------------------------------------------------------------------------------------------------------------------------------------------------------------------------------------------------------------------------------|-------------------------------------------------------------------------------------------------------------------------------------------------------------------------------------------------------------------------------------------------------------------------------------------------------------------------------------------------------------------------------------------------------------------------------------------------------------------------------------------------------------------------------------------------------------------------------------------------------------------------------------------|------------------------------------------------------------------------------------------------------------------------------------------------------------------------------------------------------------------------------------------------------------------------------------------------------------|-------------------------------------------------------------------|-------------------------------------------------------------------------------------------------------------------------------|---------------------------------------------------------|
|         |           |                        |         |                                                                                                                                                                                                                                                                                                                                                                                                            | promoters. It has been shown that RREB1 increases expression of calcitonin, which may be involved in Ras/Raf-mediated cell differentiation; it increases transcription of the angiotensinogen gene. Multiple transcript variants encoding several different isoforms have been found for this gene [provided by RefSeq].                                                                                                                                                                                                                                                                                                                  | median level. Staining was strong in CNS (brain), Hematopoietic (blood), Liver and pancreas, Digestive (GI-tract), Respiratory (lung), Cardiovascular, Female tissues, Placenta, Male tissues, Urinary tract (kidney), Skin and soft tissues and Endocrine tissues (HPA). Expression is ubiquitous (HPRD). |                                                                   | et al.), Serum urate (rs675209, Yang Q et al.)                                                                                |                                                         |
| overall | rs1165151 | 6 25792500<br>26250500 | SLC17A1 | <p><i>HIST1H3G</i><br/><i>TRIM38</i><br/><i>HIST1H4C</i><br/><i>HIST1H2AA</i><br/><i>HIST1H4B</i><br/><i>HIST1H1A</i><br/><i>HIST1H4A</i><br/><i>HIST1H1C HFE</i><br/><i>HIST1H3B</i><br/><i>HIST1H2AG</i><br/><i>(SLC17A3) SGGN</i><br/><i>HIST1H2BB</i><br/><i>HIST1H1F</i><br/><i>SLC17A4</i><br/><i>SLC17A2</i><br/><i>HIST1H2BA</i><br/><i>HIST1H3A</i><br/><i>HIST1H2AB</i><br/><i>HIST1H2BG</i></p> | SLC17A1 encodes a member of the SLC17/type I phosphate transporter family based on ability to cotransport sodium (Na+) and inorganic phosphate (Pi) in oocytes and believed to play an important role in phosphate homeostasis <sup>118</sup> . The primary function of members of this family has been shifted to diverse organic anions transport <sup>119</sup> . Detailed characterization of the transport properties of SLC17A1 demonstrates it to be a voltage dependent multispecific renal anion exporter able of transporting urate and likely to be involved in urate excretion under physiological condition <sup>120</sup> . | SLC17A1 mRNA transcripts have been detected in kidney, liver and brain <sup>118</sup> with strong expression in the kidney cortex where protein immunodetection, in rabbit, is restricted to the brush border membranes of proximal tubules <sup>121</sup> .                                               |                                                                   | Serum uric acid (rs1183201, Kolz M et al.), Serum urate (rs1165205, Dehghan A et al.), Serum urate (rs1165196, Yang Q et al.) |                                                         |
|         |           |                        | SLC17A3 |                                                                                                                                                                                                                                                                                                                                                                                                            | Paralog of <i>SLC17A1</i> believed to have similar function.                                                                                                                                                                                                                                                                                                                                                                                                                                                                                                                                                                              | The mRNA is expressed predominantly in the kidney. Strong immunodetection was observed in smooth muscle cells, luminal membranes of renal tubules, basal cells of airways and squamous epithelia (HPA).                                                                                                    | Glycogen storage disease (MIM #232240), but causality not proven. |                                                                                                                               |                                                         |
| overall | rs729761  | 6 43661000<br>44190000 | VEGFA   | <p><i>MRPS18A</i><br/><i>MRPL14 POLH</i><br/><i>C6orf206</i><br/><i>MAD2L1BP</i><br/><i>GTPBP2</i></p>                                                                                                                                                                                                                                                                                                     | VEGFA is a member of the platelet-derived growth factor (PDGF)/vascular endothelial growth factor (VEGF) family and encodes a protein that is often found as a disulfide linked homodimer. VEGF binds to and activates a receptor tyrosine kinase, VEGFR (FLT1/VEGFR1 and KDR/VEGFR2). Vascular                                                                                                                                                                                                                                                                                                                                           | The <i>VEGFA</i> transcript is expressed in most tissues around the median level and predominantly detected in prostate, lung, thyroid and pancreatic                                                                                                                                                      | Microvascular complication of diabetes (MIM #603933)              | Chronic kidney disease (rs881858, Köttgen A et al.), Type 2 diabetes (rs9472138, Zeggini E et al.)                            | gamma-glutamylglutamate / pyroglutamyglycine (p=4.2E-7) |

|         |            |                          |               |                                           |                                                                                                                                                                                                                                                                                                                                                                                                                                                                                                   |                                                                                                                                                                                                                                                                                                                                                                                                                   |                                                                             |                                                                                                                                                                                                                                                                                                                                                                                                                                                                    |  |
|---------|------------|--------------------------|---------------|-------------------------------------------|---------------------------------------------------------------------------------------------------------------------------------------------------------------------------------------------------------------------------------------------------------------------------------------------------------------------------------------------------------------------------------------------------------------------------------------------------------------------------------------------------|-------------------------------------------------------------------------------------------------------------------------------------------------------------------------------------------------------------------------------------------------------------------------------------------------------------------------------------------------------------------------------------------------------------------|-----------------------------------------------------------------------------|--------------------------------------------------------------------------------------------------------------------------------------------------------------------------------------------------------------------------------------------------------------------------------------------------------------------------------------------------------------------------------------------------------------------------------------------------------------------|--|
|         |            |                          |               |                                           | endothelial growth factor is a signaling protein that specifically acts on endothelial cells and has various effects, including mediating increased vascular permeability, inducing angiogenesis, vasculogenesis and endothelial cell growth, promoting cell migration, and inhibiting apoptosis.                                                                                                                                                                                                 | islets. Essentially all normal tissues except lymphoid tissues displayed strong cytoplasmic staining. The positivity was often accentuated to the plasma or nuclear membrane.                                                                                                                                                                                                                                     |                                                                             |                                                                                                                                                                                                                                                                                                                                                                                                                                                                    |  |
| overall | rs1178977  | 7 72446285<br>72700785   | <i>BAZ1B</i>  | <i>BCL7B (MLXIPL)</i><br><i>FZD9 TBL2</i> | Bromodomain adjacent to zinc finger domain, 1B: this gene encodes a member of the bromodomain protein family. The bromodomain is a structural motif characteristic of proteins involved in chromatin-dependent regulation of transcription. This gene is deleted in Williams-Beuren syndrome, a developmental disorder caused by deletion of multiple genes at 7q11.23 [provided by RefSeq].                                                                                                      | Expression of the <i>BAZ1B</i> transcript occurs at approximately the median level for most tissues, with higher expression levels in skeletal muscle. Protein is found in Aorta, Brain, Colon, Fetus, Heart, Kidney, Leukocyte, Liver, Lung, Ovary, Pancreas, Placenta, Prostate, Skeletal muscle, Small intestine, Spleen, T Cell, Testis (HPRD). Staining is strong in brain, GI tract and male tissues (HPA). | Williams-Beuren syndrome (MIM #194050)                                      | Plasma levels of Protein C (rs17145713, Tang W et al.), Hypertriglyceridemia (rs714052, Johansen CT et al.), Triglycerides (rs714052, Kathiresan S et al.), Caffeine consumption (rs2240466, Cornelis MC et al.), Triglycerides (rs2240466, Aulchenko YS et al.), Triglycerides (rs17145738, Kathiresan S et al.), Triglycerides (rs17145738, Willer CJ et al.), Triglycerides (rs1178979, Waterworth DM et al.), C-reactive protein (rs1323571, Dehghan A et al.) |  |
|         |            |                          | <i>MLXIPL</i> |                                           | <i>MLXIPL</i> encodes a basic helix-loop-helix leucine zipper transcription factor of the Myc/Max/Mad superfamily. This protein forms a heterodimeric complex and binds and activates, in a glucose-dependent manner, carbohydrate response element (ChoRE) motifs in the promoters of triglyceride synthesis genes. The gene is deleted in Williams-Beuren syndrome, a multisystem developmental disorder caused by the deletion of contiguous genes at chromosome 7q11.23 [provided by RefSeq]. | Expression of the <i>MLXIPL</i> transcript occurs at approximately the median level for most tissues, with higher expression levels in neural and adrenal tissue. Protein is found in Fetus, Kidney, Liver, Spleen (HPRD).                                                                                                                                                                                        | Williams-Beuren syndrome (MIM #194050)                                      |                                                                                                                                                                                                                                                                                                                                                                                                                                                                    |  |
| overall | rs10480300 | 7 151022285<br>151142785 | <i>PRKAG2</i> |                                           | The gene encodes for the 5'-AMP-activated protein kinase (AMPK) subunit gamma-2. AMPK is an enzyme that regulates key enzymes for glucose metabolism and the biosynthesis of fatty acid and cholesterol (RefSeq). AMPK is involved in the regulation of endothelial function by VEGFA, a newly identified urate QTL. AMPK                                                                                                                                                                         | The transcript and protein are ubiquitously expressed (Gene Atlas, HPRD).                                                                                                                                                                                                                                                                                                                                         | familial hypertrophic cardiomyopathy-6 (MIM #600858), Wolff-Parkinson-White | Hematocrit (rs10224002, Ganesh SK et al.), Hemoglobin (rs10224002, Ganesh SK et al.)                                                                                                                                                                                                                                                                                                                                                                               |  |

|         |            |                        |                |                  |                                                                                                                                                                                                                                                                                                                                                                                                                                                                                                                       |                                                                                                                                                                                                                                                                                                                                                                                                                                          |                                                                             |                                                       |  |
|---------|------------|------------------------|----------------|------------------|-----------------------------------------------------------------------------------------------------------------------------------------------------------------------------------------------------------------------------------------------------------------------------------------------------------------------------------------------------------------------------------------------------------------------------------------------------------------------------------------------------------------------|------------------------------------------------------------------------------------------------------------------------------------------------------------------------------------------------------------------------------------------------------------------------------------------------------------------------------------------------------------------------------------------------------------------------------------------|-----------------------------------------------------------------------------|-------------------------------------------------------|--|
|         |            |                        |                |                  | is also considered to be a redox sensor <sup>122</sup> .                                                                                                                                                                                                                                                                                                                                                                                                                                                              |                                                                                                                                                                                                                                                                                                                                                                                                                                          | syndrome (MIM #194200), glycogen storage disease of the heart (MIM #261740) |                                                       |  |
| overall | rs17786744 | 8 23751500<br>23845500 | <i>STC1</i>    |                  | Stanniocalcin 1 is a secreted homodimer that may have autocrine or paracrine function. It is synthesized in human kidney and a role in the regulation of intestinal and renal calcium and phosphate transport has been described <sup>123</sup> .                                                                                                                                                                                                                                                                     | The transcript is highly expressed in smooth muscle (Gene Atlas)<br>The protein is expressed in many tissues (HPA).                                                                                                                                                                                                                                                                                                                      | none                                                                        | Chronic kidney disease (rs10109414, Köttgen A et al.) |  |
| overall | rs2941484  | 8 76603500<br>76727500 | <i>HNF4G</i>   |                  | Hepatocyte nuclear factor 4, gamma ( <i>HNF4G</i> ) functions as a transcription factor. In one study, <i>HNF4G</i> knock-out mice had lowered energy expenditure and locomotor activity resulting in higher body weight <sup>124</sup> .                                                                                                                                                                                                                                                                             | Expression of the <i>HNF4G</i> transcript occurs in most tissues around the median level. Protein found in Colon, Kidney, Pancreas, Small intestine, Testis (HPRD). Strong staining in blood, liver, pancreas, GI tract, lung, female and male tissues, kidney, endocrine tissue and skin/soft tissues (HPA).                                                                                                                            | none                                                                        |                                                       |  |
| overall | rs10813960 | 9 33098500<br>33178500 | <i>B4GALT1</i> |                  | Beta-1,4-galactosyltransferase 1. <i>B4GALT1</i> is one of seven beta-1,4-galactosyltransferase (beta4GalT) genes. They encode type II membrane-bound glycoproteins that appear to have exclusive specificity for the donor substrate UDP-galactose; all transfer galactose in a beta1,4 linkage to similar acceptor sugars: GlcNAc, Glc, and Xyl. This gene is unique among the beta4GalT genes because it encodes an enzyme that participates both in glycoconjugate and lactose biosynthesis [provided by RefSeq]. | Expression of the <i>B4GALT1</i> transcript occurs in most tissues around the median level, with higher levels of expression in skeletal muscle. Protein found in Lacrimal gland, Liver, Placenta, Semen, Tears (HPRD). High levels of annotated protein expression occur in CNS, Hematopoietic, Liver and pancreas, GI-tract, Respiratory, Cardiovascular, Male and Female tissues, Placenta, Kidney, Skin and Endocrine tissues (HPA). | Congenital disorder of glycosylation, type IID (MIM #607091).               |                                                       |  |
| overall | rs10821905 | 10 52114500            | <i>A1CF</i>    | ( <i>ASAH2</i> ) | APOBEC1 complementation factor. It has                                                                                                                                                                                                                                                                                                                                                                                                                                                                                | Expression of the <i>A1CF</i>                                                                                                                                                                                                                                                                                                                                                                                                            | none                                                                        |                                                       |  |

|         |           |                         |  |          |                                                                                                                                                                                                                                                                                                                                                                                                                                                                                                           |                                                                                                                                                                                                                                                                         |      |                                                                                     |  |
|---------|-----------|-------------------------|--|----------|-----------------------------------------------------------------------------------------------------------------------------------------------------------------------------------------------------------------------------------------------------------------------------------------------------------------------------------------------------------------------------------------------------------------------------------------------------------------------------------------------------------|-------------------------------------------------------------------------------------------------------------------------------------------------------------------------------------------------------------------------------------------------------------------------|------|-------------------------------------------------------------------------------------|--|
|         |           | 52319000                |  | ASAH2B   | been proposed that this complementation factor functions as an RNA-binding subunit and docks APOBEC-1 to deaminate the upstream cytidine. Studies suggest that the protein may also be involved in other RNA editing or RNA processing events. Several transcript variants encoding a few different isoforms have been found for this gene [provided by RefSeq].                                                                                                                                          | transcript occurs in most tissues around the median level, with higher levels of expression in liver, pancreas and small intestine. Staining is strong in liver, pancreas, GI tract and kidney (HPA). Protein is found in Liver and Small intestine (HPRD).             |      |                                                                                     |  |
|         |           |                         |  | ASAH2    | Encodes the enzyme neutral ceramidase which hydrolyzes the sphingolipid ceramide into sphingosine and free fatty acid. It is probably involved in the digestion of dietary sphingolipids in intestine by acting as a key enzyme for the catabolism of dietary sphingolipids, thereby regulating the levels of bioactive sphingolipid metabolites in the intestinal tract [UniProt].                                                                                                                       | No expression data is available in HPA (Human Protein Atlas) for this gene.                                                                                                                                                                                             | none |                                                                                     |  |
| overall | rs1171614 | 10 61057000<br>61142000 |  | SLC16A9  | Solute carrier family 16, member 9 (monocarboxylic acid transporter 9). Identified in prior GWAS of urate <sup>125</sup> and recently shown to be a carnitine efflux transporter <sup>126</sup> . L-carnitine increases the rate of fatty acid transport in mitochondria and the oxidation of pyruvate. It accelerates gluconeogenesis from propionate in rat kidney cortex <sup>127</sup> .                                                                                                              | Expression of the <i>SLC16A9</i> transcript is predominantly found in neural, kidney and adrenal tissue. No protein expression data in HPRD.                                                                                                                            | none | Serum uric acid (rs12356193, Kolz M et al.)                                         |  |
| overall | rs1493664 | 11 25400000<br>26026500 |  | LUZP2    | Leucine zipper protein 2.                                                                                                                                                                                                                                                                                                                                                                                                                                                                                 | Expression of the <i>LUZP2</i> transcript occurs in most tissues around the median level. Protein found in urine (HPRD).                                                                                                                                                | none |                                                                                     |  |
| overall | rs2078267 | 11 63978500<br>64105500 |  | SLC22A11 | Solute carrier family 22 (organic anion/urate transporter), member 11. The protein encoded by <i>SLC22A11</i> is involved in the sodium-independent transport and excretion of organic anions, some of which are potentially toxic. The encoded protein is an integral membrane protein and is found mainly in the kidney and in the placenta, where it may act to prevent potentially harmful organic anions from reaching the fetus [provided by RefSeq]. Identified in prior GWAS <sup>125,128</sup> . | The <i>SLC22A11</i> transcript is expressed in most tissues around the median level, with substantially higher levels of expression in kidney and placenta. Staining was strong in GI tract, kidney and placenta (HPA). Protein is found in kidney and placenta (HPRD). | none | Serum urate (rs2078267, Yang Q et al.), Serum uric acid (rs17300741, Kolz M et al.) |  |
| overall | rs478607  | 11 64105500<br>64343000 |  | NRXN2    | <i>SF1 (SLC22A12)</i><br><i>RASGRP2</i><br><i>MAP4K2 PYGM</i><br>Encodes a member of the neuroligin family of neuronal cell surface proteins that function as cell adhesion molecules during                                                                                                                                                                                                                                                                                                              | Alternative splicing and the use of alternative promoters may                                                                                                                                                                                                           |      |                                                                                     |  |

|         |           |                           |              |                                                                                                                                                                                                                   |                                                                                                                                                                                                                                                                                                                                                                                                                                                                                                                         |                                                                                                                                                                                                                                     |                                             |  |  |
|---------|-----------|---------------------------|--------------|-------------------------------------------------------------------------------------------------------------------------------------------------------------------------------------------------------------------|-------------------------------------------------------------------------------------------------------------------------------------------------------------------------------------------------------------------------------------------------------------------------------------------------------------------------------------------------------------------------------------------------------------------------------------------------------------------------------------------------------------------------|-------------------------------------------------------------------------------------------------------------------------------------------------------------------------------------------------------------------------------------|---------------------------------------------|--|--|
|         |           |                           |              | <i>MEN1</i>                                                                                                                                                                                                       | synaptogenesis and in intercellular signaling.                                                                                                                                                                                                                                                                                                                                                                                                                                                                          | generate thousands of transcript variants <sup>129</sup> . mRNA expression predominantly in brain and neural tissues with strong expression in the cerebellum.                                                                      |                                             |  |  |
|         |           |                           |              | <i>SLC22A12</i>                                                                                                                                                                                                   | Encodes for URAT1, a high-affinity urate anion exchanger that was the first urate transporter characterized <sup>130</sup> . URAT1's localization on the brush membrane of renal proximal tubules, its interaction with various uricosuric drugs and the higher fractional excretion of urate in individuals with URAT1 loss of function mutations are in agreement with a role in renal urate reabsorption, in exchange of organic anions.                                                                             | The intestinal tract showed weak to moderate cytoplasmic URAT1 protein immunodetection while a subset of cells in renal tubules exhibited strong membranous immunoreactivity. Remaining normal cells were generally negative (HPA). | Idiopathic renal hypouricemia (MIM #220150) |  |  |
| overall | rs642803  | 11 65016000<br>65326500   | <i>OVOL1</i> | ( <i>LTBP3</i> ) <i>PCNXL3</i><br><i>HTATIP</i><br><i>DKFZp761E198</i><br><i>MAP3K11</i><br><i>RNASEH2C</i><br><i>EHBP1L1</i><br><i>MALAT1 KCNK7</i><br><i>SSSCA1 SCYL1</i><br><i>FAM89B RELA</i><br><i>SIPA1</i> | <i>OVOL1</i> functions as a zinc finger transcriptional repressor. Its function in humans is unknown. <i>OVOL1</i> <i>-/-</i> mice show growth retardation, aberrant hairs, hypogenitalism and kidney abnormalities such as cysts <sup>131</sup> .                                                                                                                                                                                                                                                                      | The transcript is expressed around the median level in most tissues (BioGPS). The protein is detected at high levels in CNS, GI tract, and reproductive tissues (HPA).                                                              | none                                        |  |  |
|         |           |                           |              | <i>LTBP3</i>                                                                                                                                                                                                      | The protein encoded by <i>LTBP3</i> belongs to the family of latent transforming growth factor (TGF)-beta binding proteins (LTBP), which are extracellular matrix proteins with multi-domain structure. This protein is the largest member of the LTBP family possessing unique regions and with most similarity to the fibrillins. It has thus been suggested that it may have multiple functions: as a member of the TGF-beta latent complex, as a structural component of microfibrils, and a role in cell adhesion. | The <i>LTBP3</i> transcript is expressed in heart, muscle, ovaries, and prostate (HPRD).                                                                                                                                            | Selective tooth agenesis (MIM #613097)      |  |  |
| overall | rs2195525 | 11 118720500<br>118760500 | <i>USP2</i>  | ( <i>MFRP</i> )                                                                                                                                                                                                   | The <i>USP2</i> gene encodes an ubiquitin carboxyl-terminal hydrolase 2 enzyme. Ubiquitin, a highly conserved protein involved in the regulation of intracellular protein breakdown, cell cycle regulation, and stress response, is released from degraded proteins by disassembly of the polyubiquitin chains. The disassembly process is mediated by ubiquitin-specific                                                                                                                                               | The transcript is expressed around the median level in most tissues (BioGPS). Protein is ubiquitously expressed.                                                                                                                    | none                                        |  |  |



|         |           |                           |              |                                                                                                                                                |                                                                                                                                                                                                                                                                                                                                                                                                                                        |                                                                                                                                                                                                                                |                                                                                                                                                                   |                                                                                                                                                                                                                                                                                                                                                                                   |                                                                                                                                                                                                                     |
|---------|-----------|---------------------------|--------------|------------------------------------------------------------------------------------------------------------------------------------------------|----------------------------------------------------------------------------------------------------------------------------------------------------------------------------------------------------------------------------------------------------------------------------------------------------------------------------------------------------------------------------------------------------------------------------------------|--------------------------------------------------------------------------------------------------------------------------------------------------------------------------------------------------------------------------------|-------------------------------------------------------------------------------------------------------------------------------------------------------------------|-----------------------------------------------------------------------------------------------------------------------------------------------------------------------------------------------------------------------------------------------------------------------------------------------------------------------------------------------------------------------------------|---------------------------------------------------------------------------------------------------------------------------------------------------------------------------------------------------------------------|
|         |           |                           |              |                                                                                                                                                | proteases (USPs).                                                                                                                                                                                                                                                                                                                                                                                                                      |                                                                                                                                                                                                                                |                                                                                                                                                                   |                                                                                                                                                                                                                                                                                                                                                                                   |                                                                                                                                                                                                                     |
|         |           |                           |              |                                                                                                                                                |                                                                                                                                                                                                                                                                                                                                                                                                                                        |                                                                                                                                                                                                                                |                                                                                                                                                                   |                                                                                                                                                                                                                                                                                                                                                                                   | Mutations in this gene have been associated with nanophthalmos <sup>133,134</sup> (MIM #609549), posterior microphthalmia (MIM #611040), retinitis pigmentosa, foveoschisis, and optic disc drusen <sup>135</sup> . |
|         |           |                           |              | <i>MFRP</i>                                                                                                                                    | <i>MFRP</i> encodes a member of the frizzled-related proteins <sup>132</sup> . The encoded protein may play a role in eye development.                                                                                                                                                                                                                                                                                                 | The <i>MFRP</i> transcript is expressed around the median level in most tissues (BioGPS). Renal tubules show strong luminal membranous and cytoplasmic positivity for the protein staining. Other normal tissues are negative. |                                                                                                                                                                   |                                                                                                                                                                                                                                                                                                                                                                                   |                                                                                                                                                                                                                     |
| overall | rs3741414 | 12 55835500<br>56140000   | <i>INHBC</i> | <i>R3HDM2</i><br><i>NDUFA4L2</i><br><i>SHMT2 STAC3</i><br><i>NXP4 (INHBE)</i><br><i>LRP1</i>                                                   | Encodes the beta C chain of inhibin <sup>136</sup> which belongs to the TGF-beta superfamily. Forms activin heterodimers with the inhibin beta A or beta B ( <i>INHBB</i> ) chains and interacts with the activin A receptor type IIA ( <i>ACVR2A</i> ), both of which are detected in this study. Activins play a role in regulating the secretion of various hormones, in cell growth and differentiation, and in insulin secretion. | <i>INHBC</i> transcripts are detected ubiquitously (bioGPS).                                                                                                                                                                   | none                                                                                                                                                              | Serum urate (rs1106766, Yang Q et al.)                                                                                                                                                                                                                                                                                                                                            |                                                                                                                                                                                                                     |
|         |           |                           | <i>INHBE</i> |                                                                                                                                                | The inhibin beta E chain, the gene product of <i>INHBE</i> , is secreted as a activin homodimer in mammalian cells <sup>137</sup> .                                                                                                                                                                                                                                                                                                    | The transcript is highly expressed in liver (BioGPS).                                                                                                                                                                          | none                                                                                                                                                              |                                                                                                                                                                                                                                                                                                                                                                                   |                                                                                                                                                                                                                     |
| overall | rs653178  | 12 110322163<br>111513663 | <i>ATXN2</i> | <i>TMEM116 SH2B3</i><br><i>C12orf30 RPL6</i><br><i>ERP29 TRAFD1 (PTPN11)</i><br><i>ACAD10 BRAP</i><br><i>MAPKAPK5</i><br><i>C12orf51 ALDH2</i> | The <i>ATXN2</i> gene encodes the ataxin-2 protein, containing a polyglutamine tract. Trinucleotide expansions (CAG repeat) in the coding region of this gene cause SCA2, spinocerebellar ataxia type 2.                                                                                                                                                                                                                               | The <i>ATXN2</i> transcript is expressed around the median level in most tissues. The protein shows cytoplasmic expression, predominately in the CNS and placenta.                                                             | Long expansions of the polyglutamine tract (greater than 33 repeats) result in spinocerebellar ataxia-2 (SCA2) an autosomal dominant form of olivopontocerebellar | Hematocrit (rs11065987, Ganesh SK et al.), Hemoglobin (rs11065987, Ganesh SK et al.), Coronary heart disease (rs3184504, Schunkert H et al.), Rheumatoid arthritis (rs3184504, Stahl EA et al.), Type 1 diabetes (rs3184504, Barrett JC et al.), Diastolic blood pressure (rs3184504, Levy D et al.), Systolic blood pressure (rs3184504, Levy D et al.), Plasma eosinophil count | gamma-glutamyl-leucine / valine (p=4.1E-8), gamma-glutamyl-leucine / glucose (p=8.0E-7)                                                                                                                             |

|         |           |                       |               |                     |                                                                                                                                                                                                                                                                                                                                                                                                                                                                                               |                                                                                                                                                                                                                                                          |                                                                                                                                                                                                              |                                                                                                                                                                                                                                                                                                                                                                             |  |
|---------|-----------|-----------------------|---------------|---------------------|-----------------------------------------------------------------------------------------------------------------------------------------------------------------------------------------------------------------------------------------------------------------------------------------------------------------------------------------------------------------------------------------------------------------------------------------------------------------------------------------------|----------------------------------------------------------------------------------------------------------------------------------------------------------------------------------------------------------------------------------------------------------|--------------------------------------------------------------------------------------------------------------------------------------------------------------------------------------------------------------|-----------------------------------------------------------------------------------------------------------------------------------------------------------------------------------------------------------------------------------------------------------------------------------------------------------------------------------------------------------------------------|--|
|         |           |                       |               |                     |                                                                                                                                                                                                                                                                                                                                                                                                                                                                                               |                                                                                                                                                                                                                                                          | atrophy (rs3184504, Intermediate-length expansions (27-33 glutamines) contribute to susceptibility to amyotrophic lateral sclerosis (ALS) (MIM ID #183090).                                                  | (rs3184504, Gudbjartsson DF et al.), Retinal vascular caliber (rs10774625, Ikram MK et al.), Celiac disease and Rheumatoid arthritis (rs653178, Zernakova A et al.), Chronic kidney disease (rs653178, Köttgen A et al.), Celiac disease (rs653178, Dubois PC et al.), Diastolic blood pressure (rs653178, Newton-Cheh C et al.), Celiac disease (rs653178, Hunt KA et al.) |  |
|         |           |                       | <i>PTPN11</i> |                     | The protein encoded by this gene is a member of the protein tyrosine phosphatase (PTP) family. This PTP contains two tandem Src homology-2 domains, which function as phosphotyrosine binding domains and mediate the interaction of this PTP with its substrates. This protein plays a regulatory role in various cell signaling events that are important for a diversity of cell functions, such as mitogenic activation, metabolic control, transcription regulation, and cell migration. | The <i>PTPN11</i> transcript is widely expressed in most tissues. Moderate to strong protein staining was observed in the cytoplasm in most normal tissues. Additional nuclear staining was observed in respiratory epithelia, thyroid and gall bladder. | Mutations in this gene are a cause of Noonan syndrome (MIM #163950) and Leopard syndrome (MIM #151100). Defects in the <i>PTPN11</i> gene are also present in Juvenile myelomonocytic leukemia (MIM #607785) |                                                                                                                                                                                                                                                                                                                                                                             |  |
| overall | rs584480  | 13 71 228000 71308500 | <i>DACH1</i>  |                     | The Dachshund homolog 1 (Drosophila) gene encodes a nuclear factor that together with other DNA-binding transcription factors regulates gene expression during development. SNPs in the gene associate with glomerular filtration rate.                                                                                                                                                                                                                                                       | The transcript shows low levels in all tissues except the pineal gland (BioGPS). The protein localizes to the nucleus in many cells types, including kidney, GI tract and liver (HPA).                                                                   | none                                                                                                                                                                                                         | Chronic kidney disease (rs626277, Köttgen A et al.)                                                                                                                                                                                                                                                                                                                         |  |
| overall | rs4777542 | 15 70688500 70938500  | <i>ADPGK</i>  | <i>GOLGA6B BBS4</i> | <i>ADPGK</i> is an enzyme that catalyzes the ADP-dependent phosphorylation of glucose to glucose-6-phosphate and may play a role in glycolysis, possibly during ischemic                                                                                                                                                                                                                                                                                                                      | The <i>ADPGK</i> transcript is ubiquitously expressed. No staining info in HPA.                                                                                                                                                                          | none                                                                                                                                                                                                         |                                                                                                                                                                                                                                                                                                                                                                             |  |

|         |           |                         |        |                                                                                                                                          |                                                                                                                                                                                                                                                                                                                                                                                                                                                                                                                                                                                                                                                                                      |                                                                                                                                                                                                                                                                          |                                                          |                                                                                    |  |
|---------|-----------|-------------------------|--------|------------------------------------------------------------------------------------------------------------------------------------------|--------------------------------------------------------------------------------------------------------------------------------------------------------------------------------------------------------------------------------------------------------------------------------------------------------------------------------------------------------------------------------------------------------------------------------------------------------------------------------------------------------------------------------------------------------------------------------------------------------------------------------------------------------------------------------------|--------------------------------------------------------------------------------------------------------------------------------------------------------------------------------------------------------------------------------------------------------------------------|----------------------------------------------------------|------------------------------------------------------------------------------------|--|
|         |           |                         |        |                                                                                                                                          | conditions <sup>138</sup> .                                                                                                                                                                                                                                                                                                                                                                                                                                                                                                                                                                                                                                                          |                                                                                                                                                                                                                                                                          |                                                          |                                                                                    |  |
| overall | rs1394125 | 15 73917000<br>74185500 | UBE2Q2 | FBXO22 (NRG4)<br>C15orf27                                                                                                                | Encodes for member 2 of the ubiquitin-conjugating enzyme E2Q family. Interaction with several actin and actin-binding proteins led to the hypothesis that it plays a role in cytoskeleton structure and/or regulation <sup>139</sup> .                                                                                                                                                                                                                                                                                                                                                                                                                                               | Transcripts are ubiquitously expressed at low level and overexpressed in hypopharyngeal tumors.                                                                                                                                                                          | none                                                     | Chronic kidney disease (rs1394125, Köttgen A et al.)                               |  |
|         |           |                         | NRG4   |                                                                                                                                          | Encodes for a member of the neuregulin family. Neuregulins activate type-1 growth factor receptors (e.g EGFR; MIM 131550) to initiate cell-to-cell signaling through tyrosine phosphorylation <sup>140</sup> .                                                                                                                                                                                                                                                                                                                                                                                                                                                                       | Transcripts are ubiquitously expressed around a low median level; protein detection is weak to moderate in many normal tissues and strong in astrocytes.                                                                                                                 | none                                                     |                                                                                    |  |
| overall | rs6598541 | 15 97062000<br>97139500 | IGF1R  |                                                                                                                                          | The encoded alpha and beta subunits interact to form a transmembrane tyrosine kinase receptor and are 60% similar to INSR subunits but with different ligand specificity and affinity. Activated upon binding of insulin like growth factor 1, IGF1R transduces an anti-apoptotic signal enhancing cell survival and plays a central role in cell cycle progression and transformation. IGF1 signaling pathway is thought to modulate human life span <sup>141</sup> . Beta cell-specific igf1r knock-out in mice displayed defective glucose stimulated insulin secretion and impaired glucose tolerance.                                                                           | Transcript signals are ubiquitous but strongest in breast, prostate glands, ovary, colon, saphenous vein, kidney, pancreas and lower than average in liver (BioGPS). All normal tissues tested displayed moderate to strong granular cytoplasmic immunoreactivity (HPA). | Resistance to insulin-like growth factor 1 (MIM #270450) |                                                                                    |  |
| overall | rs7193778 | 16 68094500<br>69196000 | NFAT5  | SF3B3 PDPR<br>EXOSC6<br>LOC348174<br>ST3GAL2<br>MGC34761 COG4<br>NQO1 NOB1<br>DDX19B AARS<br>FUK WWP2<br>DDX19A<br>SNORD111<br>SNORD111B | Nuclear factor of activated T-cells 5 encodes a transcription factor that regulates the expression of genes induced by osmotic stress. It upregulates the expression of several genes, among them aldose reductase that is involved in the production of organic osmolytes, most importantly sorbitol from glucose as well as the sodium/myo-inositol cotransporter (SMIT) and the sodium/chloride/betaine cotransporter <sup>142</sup> . The compound FK366 significantly inhibits aldose reductase which was paralleled by significant decreases of serum urate and increases in urinary urate excretion <sup>143</sup> . NFAT5-deficient mice show renal atrophy <sup>144</sup> . | The transcript is expressed ubiquitously (BioGPS).                                                                                                                                                                                                                       | none                                                     |                                                                                    |  |
| overall | rs7188445 | 16 78252500<br>78315500 | MAF    | LOC440389                                                                                                                                | The protein encoded by MAF is a transcription factor. It regulates embryonic lens development and is required for normal chondrocyte differentiation in                                                                                                                                                                                                                                                                                                                                                                                                                                                                                                                              | MAF is highly expressed in small intestine (BioGPS). The protein is expressed in the                                                                                                                                                                                     | Juvenile-onset pulverulent cataract,                     | Thyroid volume and goiter risk (rs17767419, R <sup>2</sup> =0.97, Teumer A et al.) |  |

|         |           |                         |                 |                                      |                                                                                                                                                                                                                                                                                                                                                                                                                                                                                                                                                                                                                                |                                                                                                                                                                                   |                                              |                                                      |  |
|---------|-----------|-------------------------|-----------------|--------------------------------------|--------------------------------------------------------------------------------------------------------------------------------------------------------------------------------------------------------------------------------------------------------------------------------------------------------------------------------------------------------------------------------------------------------------------------------------------------------------------------------------------------------------------------------------------------------------------------------------------------------------------------------|-----------------------------------------------------------------------------------------------------------------------------------------------------------------------------------|----------------------------------------------|------------------------------------------------------|--|
|         |           |                         |                 |                                      | mice <sup>145</sup> . rs7188445 is located within a region of 10.7 kb immediately downstream of the formerly predicted gene LOC440389 on 16q23 (78312710..78361930) that has been removed from the NCBI database as a result of the standard genome annotation processing. However, the presence of the correctly spliced mature <i>LOC440389</i> mRNA as predicted by the deleted data base entry was recently demonstrated in thyroid tissue and its withdrawal from the NCBI data base was therefore incorrect. The <i>LOC440389</i> region was shown to be associated with thyroid volume and goiter risk <sup>146</sup> . | nucleus of most tissues. <i>LOC440389</i> is highly expressed in thyroid tissue and also expressed in skeletal muscle tissue <sup>146</sup> .                                     | congenital cerulean cataract-4 (MIM #610202) |                                                      |  |
| overall | rs7224610 | 17 50704000<br>50766500 | <i>HLF</i>      |                                      | The hepatic leukemia factor gene encodes a member of the proline and acidic-rich (PAR) transcription factor family. There is a <i>HNF1A</i> binding site in the <i>HLF</i> gene promoter.                                                                                                                                                                                                                                                                                                                                                                                                                                      | The transcript is expressed at high levels in brain tissues (BioGPS) but also found in other tissues such as kidney, liver and thyroid (COXPRESdb).                               | none                                         |                                                      |  |
| overall | rs2079742 | 17 56785500<br>56854500 | <i>BCAS3</i>    | <i>TBX2 (C17orf82)</i>               | This gene of unknown function is overexpressed in breast cancer. <i>BCAS3</i> expression is activated by metastasis-associated protein 1 (MAT1) <sup>147</sup> .                                                                                                                                                                                                                                                                                                                                                                                                                                                               | Generalized low expression levels (BioGPS). Transcript level higher in small intestine, lymph nodes and breast (COXPRESdb).                                                       | none                                         | Chronic kidney disease (rs9895661, Köttgen A et al.) |  |
|         |           |                         | <i>C17orf82</i> |                                      | Not known.                                                                                                                                                                                                                                                                                                                                                                                                                                                                                                                                                                                                                     | Not known.                                                                                                                                                                        | none                                         |                                                      |  |
| overall | rs164009  | 17 71771500<br>71827500 | <i>QRICH2</i>   | ( <i>PRPSAP1</i> )<br><i>FAM100B</i> | Nearly no information on this gene                                                                                                                                                                                                                                                                                                                                                                                                                                                                                                                                                                                             | Generalized low expression level (BioGPS)                                                                                                                                         | none                                         |                                                      |  |
|         |           |                         | <i>PRPSAP1</i>  |                                      | Phosphoribosyl pyrophosphate synthetase-associated protein 1 (PRPSAP1) encodes PAP39 <sup>148</sup> a subunit of phosphoribosylpyrophosphate (PRPP) synthetase that is involved in urate production. No disease has been associated with this gene so far. However, mutations in PRPS1 (MIM #311850), encoding PRPP synthetase I, lead to urate overproduction <sup>149</sup> .                                                                                                                                                                                                                                                | Generalized high expression level. Transcript level is higher in testis, thyroid, central nervous system, lung and liver (BioGPS).                                                | none                                         |                                                      |  |
| overall | rs1035942 | 19 7108000<br>7201000   | <i>INSR</i>     |                                      | Encoded alpha and beta subunits that interact to form an insulin receptor, a transmembrane tyrosine kinase activated upon binding to insulin. It mediates glucose uptake and metabolism.                                                                                                                                                                                                                                                                                                                                                                                                                                       | <i>INSR</i> transcript level is higher in the kidney, adrenal cortex, the pancreas as well as placenta and ovary tissues (BioGPS). Glandular cells of the gastrointestinal tract, |                                              |                                                      |  |

|       |            |                        |                 |                                                                                                       |                                                                                                                                                                                                                                                                                                                                              |                                                                                                                                                                                                    |      |                                                                                                                                                                                                                                                                                                                                                                                                                                                                                                                                                                          |  |
|-------|------------|------------------------|-----------------|-------------------------------------------------------------------------------------------------------|----------------------------------------------------------------------------------------------------------------------------------------------------------------------------------------------------------------------------------------------------------------------------------------------------------------------------------------------|----------------------------------------------------------------------------------------------------------------------------------------------------------------------------------------------------|------|--------------------------------------------------------------------------------------------------------------------------------------------------------------------------------------------------------------------------------------------------------------------------------------------------------------------------------------------------------------------------------------------------------------------------------------------------------------------------------------------------------------------------------------------------------------------------|--|
|       |            |                        |                 |                                                                                                       |                                                                                                                                                                                                                                                                                                                                              | fallopian tube, breast, renal tubules, salivary glands and exocrine pancreas showed moderate to strong cytoplasmic and membranous protein immunodetection while other tissues were negative (HPA). |      |                                                                                                                                                                                                                                                                                                                                                                                                                                                                                                                                                                          |  |
| women | rs11954519 | 5 39526000<br>40469500 | <i>DAB2</i>     |                                                                                                       | The encoded disabled-2 protein is an intracellular adaptor protein with a proposed role in endocytosis. DAB2 binds to megalin, which is important in the reabsorption of filtered proteins by the kidney <sup>150</sup> .                                                                                                                    | The transcript is highly expressed in placenta, followed by kidney and smooth muscle (BioGPS). The protein is detected at high levels in placenta and renal tubules (GPA).                         | none |                                                                                                                                                                                                                                                                                                                                                                                                                                                                                                                                                                          |  |
| women | rs456867   | 5 55548500<br>56114000 | <i>ANKRD55</i>  |                                                                                                       | Ankyrin repeat domain 55 ( <i>ANKRD55</i> ) encodes a protein whose function is currently unknown. The superfamily ankyrin repeat domain proteins represents one class of repeat proteins, which are nonglobular proteins, playing a key role in protein-protein interactions and hence in many key physiological processes <sup>151</sup> . | Generalized medium expression level. Transcript mainly expressed in kidney, liver, ovary, uterus, peripheral blood and testes (BioGPS).                                                            | none |                                                                                                                                                                                                                                                                                                                                                                                                                                                                                                                                                                          |  |
| men   | rs11757159 | 6 32447500<br>32790500 | <i>HLA-DRB5</i> | ( <i>C6orf10</i> ) <i>HLA-DQB1 BTNL2 HLA-DQA1 HLA-DRB1 HLA-DQA1 HLA-DRA HLA-DQB1 HLA-DRB6 HLA-DRA</i> | Human major histocompatibility complex (HLA), class II, DR beta 5 determines class II molecules essential in immune response by presenting peptides derived from extracellular proteins. HLA-DRB5*1501 has been associated with multiple sclerosis <sup>152</sup> .                                                                          | Transcript mainly expressed in white blood cells (BioGPS).                                                                                                                                         | none | Rheumatoid arthritis (rs9268853, Eleftherohorinou H et al.), Ulcerative colitis (rs9268853, Anderson CA et al.), Ulcerative colitis (rs9268877, Barrett JC et al.), Ulcerative colitis (rs9268877, Franke A et al.), Ulcerative colitis (rs9268923, Franke A et al.), Ulcerative colitis (rs9268480, Asano K et al.), Ulcerative colitis (rs2395185, Asano K et al.), Ulcerative colitis (rs2395185, Silverberg MS et al.), Vitiligo (rs3806156, Jin Y et al.), Type 1 diabetes (rs9272346, Cooper JD et al.), Type 1 diabetes (rs9272346, WTCCC et al.), Hepatocellular |  |

|       |            |                           |       |                                          |                                                                                                                                                                                                                                                                                                                                                                                                                                                                                                                                                                                                                                           |                                                                                                                                                                                                                                                                                                                                                                    |                                                                                                      |                                                                                                                                                                                                                                                                                                                                                          |                                                                                        |
|-------|------------|---------------------------|-------|------------------------------------------|-------------------------------------------------------------------------------------------------------------------------------------------------------------------------------------------------------------------------------------------------------------------------------------------------------------------------------------------------------------------------------------------------------------------------------------------------------------------------------------------------------------------------------------------------------------------------------------------------------------------------------------------|--------------------------------------------------------------------------------------------------------------------------------------------------------------------------------------------------------------------------------------------------------------------------------------------------------------------------------------------------------------------|------------------------------------------------------------------------------------------------------|----------------------------------------------------------------------------------------------------------------------------------------------------------------------------------------------------------------------------------------------------------------------------------------------------------------------------------------------------------|----------------------------------------------------------------------------------------|
|       |            |                           |       |                                          |                                                                                                                                                                                                                                                                                                                                                                                                                                                                                                                                                                                                                                           |                                                                                                                                                                                                                                                                                                                                                                    |                                                                                                      |                                                                                                                                                                                                                                                                                                                                                          | carcinoma (rs9275572, Kumar V et al.), Alopecia areata (rs9275572, Petukhova L et al.) |
|       |            |                           |       |                                          |                                                                                                                                                                                                                                                                                                                                                                                                                                                                                                                                                                                                                                           |                                                                                                                                                                                                                                                                                                                                                                    |                                                                                                      |                                                                                                                                                                                                                                                                                                                                                          |                                                                                        |
|       |            |                           |       |                                          |                                                                                                                                                                                                                                                                                                                                                                                                                                                                                                                                                                                                                                           |                                                                                                                                                                                                                                                                                                                                                                    |                                                                                                      |                                                                                                                                                                                                                                                                                                                                                          |                                                                                        |
|       |            |                           |       |                                          |                                                                                                                                                                                                                                                                                                                                                                                                                                                                                                                                                                                                                                           |                                                                                                                                                                                                                                                                                                                                                                    |                                                                                                      |                                                                                                                                                                                                                                                                                                                                                          |                                                                                        |
|       |            |                           |       |                                          |                                                                                                                                                                                                                                                                                                                                                                                                                                                                                                                                                                                                                                           |                                                                                                                                                                                                                                                                                                                                                                    |                                                                                                      |                                                                                                                                                                                                                                                                                                                                                          |                                                                                        |
|       |            |                           |       |                                          |                                                                                                                                                                                                                                                                                                                                                                                                                                                                                                                                                                                                                                           |                                                                                                                                                                                                                                                                                                                                                                    |                                                                                                      |                                                                                                                                                                                                                                                                                                                                                          |                                                                                        |
| women | rs1933737  | 6 116288500<br>116811500  | FRK   | TSPYL1 NT5DC1<br>(COL10A1)<br>TSPYL4 DSE | Fyn-related kinase (FRK) encodes a tyrosine kinase that may function during G1 and S phase of the cell cycle and suppress growth. The encoded protein influences PTEN protein stability. This gene may be involved in tumor suppression.                                                                                                                                                                                                                                                                                                                                                                                                  | Generalized low expression level (BioGPS). Transcript expressed mainly in cervix, uterus, lung and kidney (COXPRESdb).                                                                                                                                                                                                                                             | none                                                                                                 |                                                                                                                                                                                                                                                                                                                                                          |                                                                                        |
|       |            |                           |       |                                          |                                                                                                                                                                                                                                                                                                                                                                                                                                                                                                                                                                                                                                           |                                                                                                                                                                                                                                                                                                                                                                    |                                                                                                      |                                                                                                                                                                                                                                                                                                                                                          |                                                                                        |
|       |            |                           |       |                                          |                                                                                                                                                                                                                                                                                                                                                                                                                                                                                                                                                                                                                                           |                                                                                                                                                                                                                                                                                                                                                                    |                                                                                                      |                                                                                                                                                                                                                                                                                                                                                          |                                                                                        |
|       |            |                           |       |                                          |                                                                                                                                                                                                                                                                                                                                                                                                                                                                                                                                                                                                                                           |                                                                                                                                                                                                                                                                                                                                                                    |                                                                                                      |                                                                                                                                                                                                                                                                                                                                                          |                                                                                        |
|       |            |                           |       |                                          |                                                                                                                                                                                                                                                                                                                                                                                                                                                                                                                                                                                                                                           |                                                                                                                                                                                                                                                                                                                                                                    |                                                                                                      |                                                                                                                                                                                                                                                                                                                                                          |                                                                                        |
|       |            |                           |       |                                          |                                                                                                                                                                                                                                                                                                                                                                                                                                                                                                                                                                                                                                           |                                                                                                                                                                                                                                                                                                                                                                    |                                                                                                      |                                                                                                                                                                                                                                                                                                                                                          |                                                                                        |
| women | rs2244608  | 12 119864663<br>119975163 | HNF1A | C12orf43 OASL                            | Hepatocyte nuclear factor 1 homeobox A, transcription factor first characterized as required for the expression of several liver-specific genes <sup>158</sup> and that plays a role in hormone secretion, bile production, lipids and glucose metabolism. Recently shown to be a master regulator of plasma protein fucosylation <sup>159</sup> . Renal phenotype of mice lacking <i>HNF1a</i> included defects in renal proximal tubule reabsorption in tune with reduced levels of <i>SLC5A2</i> , <i>SLC17A1</i> and <i>SLC17A3</i> genes' expression <sup>160</sup> , these two later transporters are also candidates in our study. | The transcript is expressed in most tissues around median level (BioGPS). Protein immuno-staining in the nucleus is the strongest in gastrointestinal tract cells, gall bladder and cells in renal tubuli (HPA). Purkinje cells also showed moderate cytoplasmic and nuclear immuno-staining while remaining normal tissues were weakly stained or negative (HPA). | Defects in this gene are a cause of maturity onset diabetes of the young type 3 (MODY3, MIM #600490) | N-glycan levels (rs7953249, Lauc G et al.), LDL cholesterol (rs2650000, Kathiresan S et al.), Other metabolic traits (rs2650000, Sabatti C et al.), C-reactive protein (rs1183910, Dehghan A et al.), C-reactive protein (rs1183910, Elliott P et al.), C-reactive protein (rs7310409, Okada Y et al.), C-reactive protein (rs7310409, Ridker PM et al.) |                                                                                        |
| women | rs12955983 | 18 55629500<br>56316000   | MC4R  | PMAIP1                                   | The protein encoded by this gene is a membrane-bound receptor and member of the melanocortin receptor family. The encoded protein interacts with members of the melanocortin family: alpha-, beta- and gamma-melanocyte stimulating hormones                                                                                                                                                                                                                                                                                                                                                                                              | The <i>MC4R</i> transcript is expressed around the median level in most tissues. Most normal tissues displayed moderate cytoplasmic                                                                                                                                                                                                                                | Obesity (MIM #601665)                                                                                | Body mass index (rs571312, Speliotes EK et al.), Body mass index (rs12970134, Thorleifsson G et al.), Weight (rs12970134,                                                                                                                                                                                                                                |                                                                                        |

|           |           |                          |         |                               |                                                                                                                                                                                                                                                                                                                                                                                                                                                                                                                                                                                                                                                                                                                                                                                                                                                                                                                                                                                                                                                                       |                                                                                                                                                                                                                                                                                            |                          |                                                                                                                                                                                                                                                                                                                                                  |  |
|-----------|-----------|--------------------------|---------|-------------------------------|-----------------------------------------------------------------------------------------------------------------------------------------------------------------------------------------------------------------------------------------------------------------------------------------------------------------------------------------------------------------------------------------------------------------------------------------------------------------------------------------------------------------------------------------------------------------------------------------------------------------------------------------------------------------------------------------------------------------------------------------------------------------------------------------------------------------------------------------------------------------------------------------------------------------------------------------------------------------------------------------------------------------------------------------------------------------------|--------------------------------------------------------------------------------------------------------------------------------------------------------------------------------------------------------------------------------------------------------------------------------------------|--------------------------|--------------------------------------------------------------------------------------------------------------------------------------------------------------------------------------------------------------------------------------------------------------------------------------------------------------------------------------------------|--|
|           |           |                          |         |                               | (MSH) and adrenocorticotrophic (ACTH) hormones and is mediated by G proteins. The melanocortins are involved in a wide range of physiological functions, including pigmentation, energy homeostasis, inflammation, immunomodulation, steroidogenesis and temperature control.                                                                                                                                                                                                                                                                                                                                                                                                                                                                                                                                                                                                                                                                                                                                                                                         | protein staining. The intestine, renal tubuli, airway epithelium and trophoblastic cells exhibited strong membranous positivity. Exocrine pancreas and a subset of lymphoid cells showed strong cytoplasmic staining. Squamous epithelia, cells in the CNS and liver were mainly negative. |                          | Thorleifsson G et al.), Waist circumference and related phenotypes (rs12970134, Chambers JC et al.), Obesity (rs17782313, Meyre D et al.), Body mass index (rs17782313, Willer CJ et al.), Body mass index (rs17782313, Loos RJ et al.), Waist circumference (rs489693, Heard-Costa NL et al.), Obesity (extreme) (rs10871777, Scherag A et al.) |  |
| candidate | rs4149178 | 6 43367500<br>43544000   | SLC22A7 | ZNF318 DLK2<br>CRIP3 ABCC10   | SLC22A7 encodes for an organic anion transporter localized to liver and kidney cells <sup>161</sup> . In the kidney, it localizes to the basolateral membrane of proximal tubular cells where it mediates uptake of organic anions from the blood. Recently, it was shown that SLC22A7 transported urate in HEK293 cells stably expressing the transporter <sup>162</sup> .                                                                                                                                                                                                                                                                                                                                                                                                                                                                                                                                                                                                                                                                                           | The SLC22A7 transcript and protein is very highly expressed in the liver, followed by the kidney (BioGPS and HPRD).                                                                                                                                                                        | none                     |                                                                                                                                                                                                                                                                                                                                                  |  |
| network   | rs884080  | 1 1867198<br>2023698     | PRKCZ   | KIAA1751<br>GABRD             | PRKCZ is a member of the PKC family of serine/threonine kinase classified as atypical as not requiring calcium and diacylglycerol for activation. Alternative splicing is generating at least 2 different isoforms: PKCzeta and PKMzeta. The former is a key regulator of intracellular signaling pathways induced by various extracellular stimuli <sup>163</sup> , e.g its activation, thought to be downstream of PI3K's, is required for insulin stimulation of glucose transport in myotubules and adipocyte cell culture <sup>164,165</sup> . The latter, PKMzeta, is brain specific and involves in long term potentiation <sup>166</sup> . In human kidney, PDZCzeta has been pulled by yeast two-hybrid as interacting directly with SLC22A8, and functional studies in rodent indicated that activation of PKCzeta by insulin or EFG increased SLC22A6 and SLC22A8 anion transport activity <sup>167</sup> . These transporters located at the basolateral membrane of proximal tubules mediated drug elimination but also urate secretion <sup>168</sup> . | Protein detected in all tissues at variable levels, with strongest expression observed in CNS and pancreas.                                                                                                                                                                                | none                     |                                                                                                                                                                                                                                                                                                                                                  |  |
| network   | rs4970988 | 1 148792051<br>149266551 | ARNT    | GOLPH3L CTSK<br>FAM63A SETDB1 | Aryl hydrocarbon receptor nuclear translocator is required for the                                                                                                                                                                                                                                                                                                                                                                                                                                                                                                                                                                                                                                                                                                                                                                                                                                                                                                                                                                                                    | Transcript is expressed at median levels in                                                                                                                                                                                                                                                | translocation creating a |                                                                                                                                                                                                                                                                                                                                                  |  |

|         |            |                          |               |                                                          |                                                                                                                                                                                                                                                                                                                                                                                                                                                                                                                                                                                                                                                                                                                                                                                          |                                                                                                                                                                                                                              |                                                                                    |  |                             |
|---------|------------|--------------------------|---------------|----------------------------------------------------------|------------------------------------------------------------------------------------------------------------------------------------------------------------------------------------------------------------------------------------------------------------------------------------------------------------------------------------------------------------------------------------------------------------------------------------------------------------------------------------------------------------------------------------------------------------------------------------------------------------------------------------------------------------------------------------------------------------------------------------------------------------------------------------------|------------------------------------------------------------------------------------------------------------------------------------------------------------------------------------------------------------------------------|------------------------------------------------------------------------------------|--|-----------------------------|
|         |            |                          |               | <i>CTSS MCL1 LASS2 ANXA9 PRUNE HORMAD1 ENSA ADAMTSL4</i> | translocation to the nucleus of the xenobiotic bound Ah receptor where the complex activates transcription of enzymes involved in xenobiotic response. It also forms a complex with HIF-alpha, the heterodimeric hypoxia-inducible transcription factor, HIF1, which mediates the activation of several genes including erythropoietin <sup>169</sup> , VEGF <sup>170</sup> , nitric oxide synthase <sup>171</sup> , several glycolytic enzymes <sup>172</sup> , as well as <i>ABCG2</i> in cell cultures <sup>173</sup> . Experiments in rats suggest that the cross-talk between oxygen availability and glucose is mediated by HIF1 <sup>174</sup> . Mice lacking ARNT in fat are protected against diet-induced obesity, glucose intolerance and insulin resistance <sup>175</sup> . | most tissues (BioGPS). Protein detected in nucleus of most cell types.                                                                                                                                                       | fusion between <i>ETV6</i> and <i>ARN7</i> in acute myeloid leukemia (MIM #601626) |  |                             |
| network | rs10489401 | 1 184520466<br>185076966 | <i>PTGS2</i>  | <i>C1orf27 PRG4 PDC PLA2G4A OCLM TPR</i>                 | <i>PTGS2</i> encodes for the inducible form of prostaglandin-endoperoxide synthase (cyclooxygenase) that catalyzes the first rate-limiting step of conversion of arachidonic acid to prostaglandins. It is concerned with injury, inflammation and proliferation. In an animal model, the calcium-sensing receptor signaling cascade triggering the ion transports of the medullary thick ascending limb involve <i>PTGS2</i> and <i>NFAT</i> <sup>176</sup> .                                                                                                                                                                                                                                                                                                                           | The transcript is highly expressed in pancreatic islets, bronchial epithelium cells and smooth muscle (BioGPS). The protein is detected selectively in gall bladder, urinary bladder and genital tract at high levels (HPA). | none                                                                               |  |                             |
| network | rs6707470  | 2 158005738<br>158121238 | <i>ACVR1C</i> | <i>PSCDBP</i>                                            | <i>ACVR1C</i> encodes for a type I activin receptor, also known as ALK7. The combination of <i>ACVR2A</i> and <i>ACVR1C</i> is preferred for activin AB and B signaling <sup>177</sup> . Together with its co-receptors, ALK7 transduces signals that play an important role in glucose-stimulated insulin secretion, development, and glucose homeostatic control of pancreatic endocrine cells <sup>178</sup> .                                                                                                                                                                                                                                                                                                                                                                        | <i>ACVR1C</i> transcript expressed ubiquitously at median levels (BioGPS), protein expressed at highest levels in testis, prostate, renal tubules and thyroid (HPA).                                                         | none                                                                               |  |                             |
| network | rs4972801  | 2 176447239<br>176636239 | <i>HOXD12</i> |                                                          | <i>HOXD12</i> belongs to the homeobox family of genes. The homeobox genes encode a highly conserved family of transcription factors that play an important role in morphogenesis in all multicellular organisms. Mammals possess four similar homeobox gene clusters, <i>HOXA</i> , <i>HOXB</i> , <i>HOXC</i> and <i>HOXD</i> , located on different chromosomes, consisting of 9 to 11 genes arranged in tandem. This gene is one of several homeobox <i>HOXD</i> genes located in a cluster on chromosome 2. Deletions that remove the entire <i>HOXD</i> gene cluster or                                                                                                                                                                                                              | Expression of the transcript occurs in most tissues around the median level.                                                                                                                                                 | none                                                                               |  | cortisone / urea (p=3.9E-6) |



|         |            |                          |                |                                                                                                                                                                                                     |                                                                                                                                                                                                                                                                                                                                                                                                                                                                    |                                                                                                                                                                           |                                                                                                                |  |  |
|---------|------------|--------------------------|----------------|-----------------------------------------------------------------------------------------------------------------------------------------------------------------------------------------------------|--------------------------------------------------------------------------------------------------------------------------------------------------------------------------------------------------------------------------------------------------------------------------------------------------------------------------------------------------------------------------------------------------------------------------------------------------------------------|---------------------------------------------------------------------------------------------------------------------------------------------------------------------------|----------------------------------------------------------------------------------------------------------------|--|--|
|         |            |                          |                |                                                                                                                                                                                                     | the 5' end of this cluster have been associated with severe limb and genital abnormalities. The exact role of this gene has not been determined.                                                                                                                                                                                                                                                                                                                   |                                                                                                                                                                           |                                                                                                                |  |  |
| network | rs12468226 | 2 202668239<br>204153739 | <i>BMPR2</i>   | <i>ICA1L</i><br><i>NOP5/NOP58</i><br><i>SNORD11</i><br><i>WDR12 CYP20A1</i><br><i>ALS2CR13</i><br><i>NBEAL1</i><br><i>NOP5/NOP58</i><br><i>ABI2 RAPH1</i><br><i>SUMO1 ALS2CR8</i><br><i>SNORD70</i> | <i>BMPR2</i> encodes a type II receptor structurally very similar to ACVR2A and binds to the bone morphogenetic proteins BMP-7, BMP-2 and, less efficiently, BMP-4. Shared ligands/receptors suggest crosstalks between the activin and BMP pathways. BMPs are involved in endochondral bone formation and embryogenesis.                                                                                                                                          | Expression of the transcript occurs in most tissues around the median level.                                                                                              | Primary pulmonary hypertension (MIM #178600), Pulmonary venoocclusive disease (MIM #265450)                    |  |  |
| network | rs300915   | 4 144145345<br>144556345 | <i>GAB1</i>    | <i>USP38</i>                                                                                                                                                                                        | The protein encoded by <i>GAB1</i> is a member of the IRS1-like multi-substrate docking protein family. It is an important mediator of branching tubulogenesis and plays a central role in cellular growth response, transformation and apoptosis. Two transcript variants encoding different isoforms have been found for this gene.                                                                                                                              | Expression of the transcript occurs in most tissues around the median level.                                                                                              | none                                                                                                           |  |  |
| network | rs4073745  | 5 176442000<br>176777000 | <i>SLC34A1</i> | <i>RGS14 F12</i><br><i>PRELID1 PFN3</i><br><i>LMAN2 PRELID1</i><br><i>RAB24 MXD3</i><br><i>FGFR4 NSD1</i>                                                                                           | <i>SLC34A1</i> encodes for a type II sodium-phosphate cotransporter that is expressed in the brush-border membrane of renal proximal tubular cells where it mediates phosphate reabsorption.                                                                                                                                                                                                                                                                       | Transcript is expressed at high levels only in kidney.                                                                                                                    | Fanconi renotubular syndrome 2 (MIM #613388), Nephrolithiasis/osteoporosis, hypophosphatemic, 1 (MIM #612286). |  |  |
| network | rs7944548  | 11 358500<br>630000      | <i>HRAS</i>    | <i>KIAA1542 DRD4</i><br><i>IRF7 LRRC56</i><br><i>RASSF7 RNH1</i><br><i>SIGIRR TMEM167</i><br><i>SCT PKP3</i><br><i>PTDSS2 MUPCDH</i><br><i>B4GALNT4</i>                                             | <i>HRAS</i> belongs to the Ras oncogene family, whose members are related to the transforming genes of mammalian sarcoma retroviruses. The products encoded by these genes function in signal transduction pathways. These proteins can bind GTP and GDP, and they have intrinsic GTPase activity. This protein undergoes a continuous cycle of de- and re-palmitoylation, which regulates its rapid exchange between the plasma membrane and the Golgi apparatus. | Expression of the transcript occurs in most tissues around the median level, with higher expression levels in CNS tissue, epithelial cells and colorectal adenocarcinoma. | Mutations in this gene cause Costello Syndrome (MIM #218040).                                                  |  |  |
| network | rs11056399 | 12 15245500<br>15457500  | <i>PTPRO</i>   | <i>RERG</i>                                                                                                                                                                                         | <i>PTPRO</i> encodes the transmembrane protein tyrosine phosphatase, receptor type, O. The enzyme catalyzes the reaction of protein tyrosine phosphate + H <sub>2</sub> O =                                                                                                                                                                                                                                                                                        | Transcript expression is high in fetal brain and immune cells. Protein expression: strong                                                                                 | Nephrotic syndrome, type 6 (MIM #614196)                                                                       |  |  |

|         |            |                           |                      |                                                               |                                                                                                                                                                                                                                                                                                                                                                                                                                                                                                                                         |                                                                                                                                                                                                                                                                                                                                                                       |                                                                            |                      |                                                               |
|---------|------------|---------------------------|----------------------|---------------------------------------------------------------|-----------------------------------------------------------------------------------------------------------------------------------------------------------------------------------------------------------------------------------------------------------------------------------------------------------------------------------------------------------------------------------------------------------------------------------------------------------------------------------------------------------------------------------------|-----------------------------------------------------------------------------------------------------------------------------------------------------------------------------------------------------------------------------------------------------------------------------------------------------------------------------------------------------------------------|----------------------------------------------------------------------------|----------------------|---------------------------------------------------------------|
|         |            |                           |                      |                                                               | protein tyrosine + phosphate.                                                                                                                                                                                                                                                                                                                                                                                                                                                                                                           | cytoplasmic and membranous positivity was observed in renal glomeruli. Remaining normal tissues were negativ.                                                                                                                                                                                                                                                         |                                                                            |                      |                                                               |
| network | rs4760636  | 12 46224500<br>46471000   | <i>HDAC7</i>         | <i>RAPGEF3 P11</i><br><i>RPAP3</i>                            | The protein encoded by <i>HDAC7</i> has sequence homology to members of the histone deacetylase family. <i>HDAC7</i> is expressed in the early stages of embryonic development and suggested to play a role endothelial proliferation and growth <sup>179</sup> . Phosphorylation of <i>HDAC7</i> mediates VEGF signaling towards endothelial cell proliferation and function <sup>180</sup> . VEGFa is also a novel urate loci candidate.                                                                                              | Expression of the transcript occurs in most tissues around the median level.                                                                                                                                                                                                                                                                                          | none                                                                       |                      | 2-stearoylgllycerophosphocholine* / caprate (10:0) (p=4.1E-6) |
| network | rs7976059  | 12 50262500<br>50802000   | <i>ACVR1B/ACVRL1</i> | <i>ANKRD33 NR4A1</i><br><i>GRASP SCN8A</i><br><i>C12orf44</i> | <i>ACVR1B</i> encodes the activin A receptor, type 1B. Activins are growth and differentiation factors of the TGF beta family. The receptor forms, upon activation, a complex with other type 1 and type 2 receptor subunits (among them <i>ACVR2A</i> ) and activates the transcriptional regulator SMAD. The adjacent gene <i>ACVRL1</i> encodes the activin A receptor, type II-like 1 which also is a cell-surface receptor and part of the activin receptor complex. It also binds TGFbeta. It has a role in arterial development. | <i>ACVR1B</i> : transcript expressed ubiquitously, protein also expressed ubiquitously with highest levels in GI tract, liver and pancreas. <i>ACVRL1</i> : transcript expression highest in lung and heart. Protein expression: Semiferus ducts, gall bladder, renal tubules, intestinal tract and neuronal cells in CNS showed strong cytoplasmic immunoreactivity. | <i>ACVRL1</i> : hereditary hemorrhagic telangiectasia type 2 (MIM #600376) |                      |                                                               |
| network | rs7953704  | 12 120967163<br>121238073 | <i>B3GNT4</i>        | <i>MLXIP BCL7A</i><br><i>IL31</i>                             | <i>B3GNT4</i> encodes a member of the beta-1,3-N-acetylglucosaminyltransferase protein family. The encoded enzyme is involved in the biosynthesis of poly-N-acetyllactosamine chains and prefers lacto-N-neotetraose as a substrate. It is a type II transmembrane protein.                                                                                                                                                                                                                                                             | Expression of the transcript occurs in most tissues around the median level.                                                                                                                                                                                                                                                                                          | none                                                                       |                      |                                                               |
| network | rs11624421 | 14 75593500<br>76126500   | <i>ESRRB</i>         | <i>BCYRN1</i><br><i>C14orf179</i><br><i>C14orf118</i>         | <i>ESRRB</i> encodes a protein with similarity to the estrogen receptor. Its function is unknown; however, a similar protein in mouse plays an essential role in placental development.                                                                                                                                                                                                                                                                                                                                                 | Expression of the transcript occurs in most tissues around the median level.                                                                                                                                                                                                                                                                                          | Autosomal-recessive deafness (MIM #608565)                                 |                      |                                                               |
| network | rs3751043  | 15 61573000<br>61973000   | <i>USP3</i>          | <i>HERC1 FBXL22</i>                                           | Ubiquitin specific peptidase 3 encodes a hydrolase that deubiquitinates monoubiquitinated target proteins such as histone H2A and H2B [GeneCards].                                                                                                                                                                                                                                                                                                                                                                                      | Expression of the transcript occurs primarily in lymphoid tissues.                                                                                                                                                                                                                                                                                                    | none                                                                       |                      |                                                               |
| network | rs2472297  | 15 72496500               | <i>CSK</i>           | <i>MPI RPP25</i>                                              | C-src tyrosine kinase; this protein                                                                                                                                                                                                                                                                                                                                                                                                                                                                                                     | High cytoplasmic                                                                                                                                                                                                                                                                                                                                                      | none                                                                       | Caffeine consumption |                                                               |

|         |            |                         |              |                                                                                                                   |                                                                                                                                                                                                                                                                                                                                                                                                                                                                                                                                                                                                                           |                                                                                                                          |                                                                  |                                                                                 |
|---------|------------|-------------------------|--------------|-------------------------------------------------------------------------------------------------------------------|---------------------------------------------------------------------------------------------------------------------------------------------------------------------------------------------------------------------------------------------------------------------------------------------------------------------------------------------------------------------------------------------------------------------------------------------------------------------------------------------------------------------------------------------------------------------------------------------------------------------------|--------------------------------------------------------------------------------------------------------------------------|------------------------------------------------------------------|---------------------------------------------------------------------------------|
|         |            | 73063000                |              | <i>COX5A LMAN1L<br/>CPLX3 C15orf17<br/>SCAMP2 UBL7<br/>CLK3 CYP1A2<br/>CYP1A1 SEMA7A<br/>ARID3B EDC3<br/>ULK3</i> | specifically phosphorylates Tyr-504 residue on human leukocyte-specific protein tyrosine kinase, which acts as a negative regulatory site. It may also act on the LYN and FYN kinases.                                                                                                                                                                                                                                                                                                                                                                                                                                    | expression in neurons in CNS. Also expressed in a few other cell types e.g in pancreas and placenta but at lower levels. |                                                                  | (rs2470893, Cornelis MC et al.), Coffee consumption (rs2472297, Sulem P et al.) |
| network | rs11574736 | 20 42471000<br>42495500 | <i>HNF4A</i> |                                                                                                                   | The protein encoded by this gene, hepatocyte nuclear factor 4-alpha, is a nuclear transcription factor which binds DNA as a homodimer. The encoded protein controls the expression of several genes, including hepatocyte nuclear factor 1 alpha, a transcription factor which regulates the expression of several hepatic genes. This gene may play a role in development of the liver, kidney, and intestines. Mutations in this gene have been associated with monogenic autosomal dominant non-insulin-dependent diabetes mellitus type I. Alternative splicing of this gene results in multiple transcript variants. | Nuclear expression in intestinal tract, liver and kidney.                                                                | Maturity-onset diabetes of the young type 1; MODY1 (MIM #125850) |                                                                                 |

- 1 Recombination interval as obtained from GRAIL.
- 2 Core gene: closest gene according to b36.
- 3 Genes in recombination interval as given by GRAIL. Manually-curated additional core genes are in brackets and selected if predicted to be the gene underlying the association by GRAIL; genes that were removed from potential core gene because the causal gene in the region is known are in strike-through. The causal gene was assumed to be known when multiple association studies confirmed association of genic variants with serum urate, several lines of experimental evidence confirmed urate transport by the encoded protein, and no other urate transporters are known to be encoded by one of the additional genes in the recombination interval.
- 4 Expression at the transcript level obtained from bioGPS, expression on protein level obtained from Human Protein Atlas (HPA, only strong and moderate expression reported) or the Human Protein Reference Database (HPRD).
- 5 The field indicates trait, SNP (if not lead SNP), first author. If no rs ID is given, the GWAS hit matches the lead SNP reported. Only SNPs with  $r^2 > 0.5$  are reported. Data available at [www.genome.gov/gwastudies](http://www.genome.gov/gwastudies). Accessed July 17, 2011.

**Supplementary Table 8: X chromosomal SNPs Associated with Serum Urate at  $p < 1 \times 10^{-4}$**

| discovery sample | SNP        | bp (b36)  | A1 | A2 | effect (mg/dl) | s.e.  | p-value | n     | I <sup>2</sup> |
|------------------|------------|-----------|----|----|----------------|-------|---------|-------|----------------|
| overall          | rs12859621 | 8924736   | a  | g  | 0.024          | 0.006 | 9.7E-05 | 63390 | 0              |
| men              | rs12556430 | 29523961  | a  | c  | 0.068          | 0.017 | 9.2E-05 | 23373 | 0              |
| women            | rs4826248  | 77258931  | t  | c  | 0.041          | 0.010 | 8.0E-05 | 37548 | 3              |
| overall          | rs4907821  | 102150170 | t  | c  | 0.024          | 0.006 | 5.0E-05 | 70723 | 27             |
| overall          | rs12833471 | 102171211 | t  | c  | 0.064          | 0.016 | 4.6E-05 | 59725 | 0              |
| men              | rs12833471 | 102171211 | t  | c  | 0.081          | 0.021 | 8.2E-05 | 27145 | 2              |
| overall          | rs5945761  | 102253461 | t  | c  | -0.027         | 0.006 | 3.6E-05 | 56119 | 45             |
| overall          | rs5945942  | 102271854 | c  | g  | -0.027         | 0.006 | 3.7E-05 | 56119 | 45             |
| overall          | rs11797302 | 102303221 | a  | g  | -0.027         | 0.006 | 3.9E-05 | 56104 | 47             |
| overall          | rs5987509  | 102311938 | t  | c  | -0.026         | 0.006 | 6.2E-05 | 56143 | 41             |
| overall          | rs5987697  | 102329964 | t  | c  | -0.027         | 0.006 | 9.9E-06 | 61598 | 43             |
| women            | rs5987697  | 102329964 | t  | c  | -0.037         | 0.009 | 4.0E-05 | 34228 | 0              |
| overall          | rs978853   | 102332334 | t  | c  | -0.024         | 0.006 | 4.4E-05 | 62102 | 38             |
| overall          | rs727656   | 102360149 | a  | g  | 0.024          | 0.006 | 5.2E-05 | 62220 | 38             |
| women            | rs727656   | 102360149 | a  | g  | 0.036          | 0.009 | 7.7E-05 | 33715 | 0              |
| overall          | rs4907879  | 102360939 | a  | c  | -0.026         | 0.006 | 2.8E-05 | 60483 | 41             |
| women            | rs4907879  | 102360939 | a  | c  | -0.036         | 0.009 | 8.5E-05 | 33710 | 0              |
| overall          | rs743767   | 102372513 | t  | c  | 0.023          | 0.006 | 3.3E-05 | 70774 | 34             |
| overall          | rs6621632  | 102381248 | a  | g  | -0.024         | 0.006 | 2.4E-05 | 71909 | 29             |
| overall          | rs2983090  | 102423718 | a  | t  | -0.026         | 0.007 | 8.0E-05 | 55920 | 45             |
| women            | rs2983090  | 102423718 | a  | t  | -0.041         | 0.010 | 3.6E-05 | 30722 | 0              |
| women            | rs2858106  | 102436869 | t  | c  | 0.042          | 0.010 | 3.2E-05 | 30669 | 0              |
| overall          | rs2743709  | 102446504 | t  | c  | -0.024         | 0.006 | 2.2E-05 | 70774 | 38             |
| women            | rs2743709  | 102446504 | t  | c  | -0.039         | 0.009 | 7.0E-06 | 38601 | 0              |
| overall          | rs2246252  | 102451859 | c  | g  | -0.026         | 0.006 | 4.9E-05 | 56177 | 46             |
| women            | rs2246252  | 102451859 | c  | g  | -0.045         | 0.010 | 2.3E-06 | 30910 | 0              |
| overall          | rs2743707  | 102457485 | t  | c  | 0.026          | 0.006 | 4.9E-05 | 56180 | 46             |
| women            | rs2743707  | 102457485 | t  | c  | 0.045          | 0.010 | 2.3E-06 | 30911 | 0              |
| overall          | rs2743706  | 102457896 | a  | g  | 0.026          | 0.006 | 4.9E-05 | 56180 | 46             |
| women            | rs2743706  | 102457896 | a  | g  | 0.045          | 0.010 | 2.3E-06 | 30911 | 0              |
| overall          | rs5945968  | 102461220 | a  | g  | 0.024          | 0.006 | 1.6E-05 | 70799 | 36             |
| women            | rs5945968  | 102461220 | a  | g  | 0.038          | 0.009 | 9.5E-06 | 38621 | 0              |
| overall          | rs5987515  | 102465559 | t  | g  | -0.026         | 0.006 | 5.3E-05 | 56173 | 46             |
| women            | rs5987515  | 102465559 | t  | g  | -0.045         | 0.010 | 2.8E-06 | 30908 | 0              |
| overall          | rs5987724  | 102465772 | a  | c  | -0.026         | 0.006 | 4.4E-05 | 56181 | 46             |
| women            | rs5987724  | 102465772 | a  | c  | -0.045         | 0.010 | 2.2E-06 | 30912 | 0              |
| overall          | rs5945971  | 102470061 | t  | c  | -0.027         | 0.006 | 3.0E-05 | 56174 | 47             |
| women            | rs5945971  | 102470061 | t  | c  | -0.045         | 0.010 | 2.4E-06 | 30907 | 0              |
| overall          | rs1045761  | 102472558 | c  | g  | 0.027          | 0.006 | 1.4E-05 | 56136 | 54             |
| women            | rs1045761  | 102472558 | c  | g  | 0.043          | 0.009 | 3.0E-06 | 30904 | 25             |
| overall          | rs5945767  | 102478099 | t  | c  | -0.028         | 0.007 | 5.6E-05 | 51875 | 42             |
| overall          | rs5945770  | 102481592 | t  | c  | 0.025          | 0.005 | 5.4E-05 | 70838 | 43             |
| women            | rs5945770  | 102481592 | t  | c  | 0.033          | 0.008 | 7.2E-05 | 38633 | 37             |
| overall          | rs5945681  | 102482252 | a  | c  | 0.026          | 0.006 | 1.6E-05 | 57319 | 50             |
| women            | rs5945681  | 102482252 | a  | c  | 0.044          | 0.009 | 1.7E-06 | 31454 | 21             |

|         |            |           |   |   |        |       |         |       |    |
|---------|------------|-----------|---|---|--------|-------|---------|-------|----|
| overall | rs5945682  | 102482305 | a | g | 0.028  | 0.007 | 6.3E-05 | 51829 | 41 |
| overall | rs5945771  | 102487941 | a | t | 0.028  | 0.007 | 6.7E-05 | 51874 | 42 |
| overall | rs5945684  | 102514550 | t | c | -0.028 | 0.007 | 5.4E-05 | 55757 | 37 |
| women   | rs5945684  | 102514550 | t | c | -0.044 | 0.011 | 3.3E-05 | 30614 | 0  |
| women   | rs12834545 | 102780114 | a | g | 0.040  | 0.010 | 8.9E-05 | 30774 | 25 |
| women   | rs5987557  | 102791388 | a | t | -0.039 | 0.010 | 1.0E-04 | 30911 | 29 |
| women   | rs12851072 | 102811779 | a | t | -0.040 | 0.010 | 7.4E-05 | 30891 | 25 |
| women   | rs5987559  | 102819675 | c | g | 0.042  | 0.010 | 4.7E-05 | 30896 | 24 |
| women   | rs6621725  | 102824099 | t | c | 0.042  | 0.010 | 4.4E-05 | 30833 | 25 |
| men     | rs5910089  | 123394763 | a | c | 0.062  | 0.015 | 3.4E-05 | 25261 | 7  |
| women   | rs12854061 | 125785524 | t | c | 0.056  | 0.013 | 2.5E-05 | 30762 | 16 |
| women   | rs5931716  | 125790926 | a | g | -0.048 | 0.012 | 6.6E-05 | 31829 | 8  |
| women   | rs5931717  | 125791688 | t | c | 0.048  | 0.012 | 9.9E-05 | 30913 | 13 |

Abbreviations: A1: allele 1 = effect allele; freq: frequency; s.e.: standard error; n: sample size; I<sup>2</sup>: heterogeneity measure.

**Supplementary Table 9: Sex-specific Effects for Urate-Associated SNPs**

| SNP        | chr | bp (b36)  | closest gene    | A1 | A2 | Men-specific effect |       |       |          | Women-specific effect |       |       |         | Effect Difference |         |
|------------|-----|-----------|-----------------|----|----|---------------------|-------|-------|----------|-----------------------|-------|-------|---------|-------------------|---------|
|            |     |           |                 |    |    | effect (mg/dl)      | s.e.  | n     | p-value  | effect (mg/dl)        | s.e.  | n     | p-value | z score           | p-value |
| rs1471633  | 1   | 144435096 | <i>PDZK1</i>    | a  | c  | 0.069               | 0.008 | 49621 | 3.5E-15  | 0.054                 | 0.007 | 59099 | 1.6E-14 | 1.31              | 1.9E-01 |
| rs11264341 | 1   | 153418117 | <i>TRIM46</i>   | t  | c  | -0.055              | 0.009 | 47709 | 1.1E-08  | -0.044                | 0.007 | 57425 | 9.1E-09 | -0.88             | 3.8E-01 |
| rs1260326  | 2   | 27584444  | <i>GCKR</i>     | t  | c  | 0.091               | 0.009 | 49808 | 3.0E-25  | 0.063                 | 0.007 | 60491 | 1.1E-18 | 2.65              | 7.9E-03 |
| rs17050272 | 2   | 121022910 | <i>INHBB</i>    | a  | g  | 0.049               | 0.010 | 47359 | 6.5E-07  | 0.030                 | 0.008 | 56259 | 1.9E-04 | 1.57              | 1.2E-01 |
| rs2307394  | 2   | 148432898 | <i>ORC4L</i>    | t  | c  | -0.036              | 0.009 | 49788 | 1.2E-04  | -0.034                | 0.007 | 59958 | 4.7E-06 | -0.12             | 9.0E-01 |
| rs6770152  | 3   | 53075254  | <i>SFMBT1</i>   | t  | g  | -0.052              | 0.009 | 49741 | 6.7E-09  | -0.047                | 0.007 | 60252 | 6.0E-11 | -0.45             | 6.5E-01 |
| rs12498742 | 4   | 9553150   | <i>SLC2A9</i>   | a  | g  | 0.269               | 0.010 | 49773 | 6.4E-153 | 0.460                 | 0.008 | 60372 | 0*      | -15.06            | 2.8E-51 |
| rs11099098 | 4   | 81388936  | <i>FGF5</i>     | t  | g  | -0.039              | 0.010 | 46850 | 1.2E-04  | -0.028                | 0.008 | 56605 | 7.3E-04 | -0.91             | 3.7E-01 |
| rs2231142  | 4   | 89271347  | <i>ABCG2</i>    | t  | g  | 0.270               | 0.014 | 49764 | 3.8E-75  | 0.181                 | 0.011 | 60433 | 1.3E-52 | 4.84              | 1.3E-06 |
| rs17632159 | 5   | 72467238  | <i>TMEM171</i>  | c  | g  | -0.043              | 0.010 | 49306 | 1.3E-05  | -0.039                | 0.008 | 58951 | 1.1E-06 | -0.34             | 7.4E-01 |
| rs675209   | 6   | 7047083   | <i>RREB1</i>    | t  | c  | 0.060               | 0.010 | 49665 | 3.3E-09  | 0.064                 | 0.008 | 60332 | 2.0E-15 | -0.36             | 7.2E-01 |
| rs1165151  | 6   | 25929595  | <i>SLC17A1</i>  | t  | g  | -0.096              | 0.008 | 49771 | 1.3E-28  | -0.089                | 0.007 | 60278 | 4.2E-37 | -0.66             | 5.1E-01 |
| rs729761   | 6   | 43912549  | <i>VEGFA</i>    | t  | g  | -0.047              | 0.010 | 49619 | 3.2E-06  | -0.047                | 0.008 | 59191 | 8.1E-09 | -0.01             | 9.9E-01 |
| rs1178977  | 7   | 72494985  | <i>BAZ1B</i>    | a  | g  | 0.055               | 0.011 | 49543 | 8.2E-07  | 0.046                 | 0.009 | 60030 | 2.6E-07 | 0.62              | 5.4E-01 |
| rs10480300 | 7   | 151036938 | <i>PRKAG2</i>   | t  | c  | 0.043               | 0.010 | 48984 | 1.7E-05  | 0.024                 | 0.008 | 59371 | 3.2E-03 | 1.56              | 1.2E-01 |
| rs17786744 | 8   | 23832951  | <i>STC1</i>     | a  | g  | -0.033              | 0.009 | 49743 | 2.1E-04  | -0.029                | 0.007 | 60317 | 5.0E-05 | -0.36             | 7.2E-01 |
| rs2941484  | 8   | 76641323  | <i>HNF4G</i>    | t  | c  | 0.048               | 0.009 | 49742 | 6.2E-08  | 0.046                 | 0.007 | 60265 | 1.3E-10 | 0.20              | 8.4E-01 |
| rs10813960 | 9   | 33170362  | <i>B4GALT1</i>  | t  | c  | -0.039              | 0.010 | 46321 | 1.7E-04  | -0.031                | 0.008 | 55927 | 2.3E-04 | -0.65             | 5.2E-01 |
| rs10821905 | 10  | 52316099  | <i>A1CF</i>     | a  | g  | 0.042               | 0.011 | 48832 | 3.8E-04  | 0.060                 | 0.009 | 59081 | 2.5E-10 | -1.22             | 2.2E-01 |
| rs1171614  | 10  | 61139544  | <i>SLC16A9</i>  | t  | c  | -0.086              | 0.011 | 46927 | 1.9E-13  | -0.067                | 0.009 | 56874 | 3.0E-13 | -1.29             | 2.0E-01 |
| rs1493664  | 11  | 25657565  | <i>LUZP2</i>    | t  | c  | -0.029              | 0.009 | 47767 | 1.1E-03  | -0.029                | 0.007 | 57862 | 6.5E-05 | -0.05             | 9.6E-01 |
| rs2078267  | 11  | 64090690  | <i>SLC22A11</i> | t  | c  | -0.085              | 0.009 | 44781 | 2.9E-19  | -0.071                | 0.007 | 53228 | 5.7E-20 | -1.19             | 2.4E-01 |
| rs478607   | 11  | 64234639  | <i>NRXN2</i>    | a  | g  | -0.058              | 0.012 | 49533 | 9.6E-07  | -0.043                | 0.009 | 60192 | 8.8E-06 | -1.07             | 2.8E-01 |
| rs642803   | 11  | 65317196  | <i>OVOL1</i>    | t  | c  | -0.047              | 0.008 | 49726 | 8.0E-08  | -0.042                | 0.007 | 60273 | 2.1E-09 | -0.45             | 6.6E-01 |
| rs2195525  | 11  | 118740614 | <i>USP2</i>     | t  | c  | -0.034              | 0.009 | 49767 | 2.5E-04  | -0.031                | 0.007 | 60442 | 3.5E-05 | -0.30             | 7.7E-01 |
| rs3741414  | 12  | 56130316  | <i>INHBC</i>    | t  | c  | -0.091              | 0.011 | 46327 | 7.0E-16  | -0.057                | 0.009 | 56301 | 4.3E-10 | -2.46             | 1.4E-02 |
| rs653178   | 12  | 110492139 | <i>ATXN2</i>    | t  | c  | -0.044              | 0.009 | 49770 | 7.5E-07  | -0.032                | 0.007 | 60453 | 5.5E-06 | -1.07             | 2.9E-01 |
| rs584480   | 13  | 71243506  | <i>DACH1</i>    | t  | c  | -0.034              | 0.009 | 49626 | 2.0E-04  | -0.029                | 0.007 | 60199 | 6.3E-05 | -0.41             | 6.8E-01 |

|            |    |           |                 |   |   |        |       |       |         |        |       |       |         |       |         |
|------------|----|-----------|-----------------|---|---|--------|-------|-------|---------|--------|-------|-------|---------|-------|---------|
| rs4777542  | 15 | 70869419  | <i>ADPGK</i>    | t | c | -0.030 | 0.009 | 49289 | 1.6E-03 | -0.034 | 0.007 | 56253 | 1.0E-05 | 0.39  | 7.0E-01 |
| rs1394125  | 15 | 73946038  | <i>UBE2Q2</i>   | a | g | 0.060  | 0.010 | 47741 | 6.3E-09 | 0.032  | 0.008 | 57826 | 1.0E-04 | 2.22  | 2.7E-02 |
| rs6598541  | 15 | 97088658  | <i>IGF1R</i>    | a | g | 0.039  | 0.009 | 49691 | 2.7E-05 | 0.050  | 0.007 | 59637 | 1.6E-11 | -0.98 | 3.3E-01 |
| rs7193778  | 16 | 68121391  | <i>NFAT5</i>    | t | c | -0.048 | 0.012 | 49733 | 2.1E-04 | -0.045 | 0.010 | 60286 | 1.0E-05 | -0.15 | 8.8E-01 |
| rs7188445  | 16 | 78292488  | <i>MAF</i>      | a | g | -0.025 | 0.009 | 49748 | 7.9E-03 | -0.040 | 0.007 | 60131 | 6.4E-08 | 1.37  | 1.7E-01 |
| rs7224610  | 17 | 50719787  | <i>HLF</i>      | a | c | -0.043 | 0.009 | 49736 | 9.0E-07 | -0.034 | 0.007 | 60412 | 3.0E-06 | -0.90 | 3.7E-01 |
| rs2079742  | 17 | 56820479  | <i>BCAS3</i>    | t | c | 0.054  | 0.013 | 48562 | 5.6E-05 | 0.048  | 0.010 | 59065 | 1.0E-05 | 0.37  | 7.1E-01 |
| rs164009   | 17 | 71795264  | <i>QRICH2</i>   | a | g | 0.024  | 0.009 | 49716 | 6.2E-03 | 0.032  | 0.007 | 60057 | 8.2E-06 | -0.70 | 4.8E-01 |
| rs1035942  | 19 | 7150803   | <i>INSR</i>     | a | g | 0.042  | 0.010 | 49700 | 2.0E-05 | 0.028  | 0.008 | 60222 | 4.6E-04 | 1.16  | 2.5E-01 |
| rs4149178  | 6  | 43380166  | <i>SLC22A7</i>  | a | g | -0.058 | 0.012 | 49725 | 2.5E-06 | -0.012 | 0.009 | 60289 | 2.1E-01 | -3.00 | 2.7E-03 |
| rs11757159 | 6  | 32628250  | <i>HLA-DRB5</i> | t | c | -0.048 | 0.009 | 49757 | 3.6E-07 | -0.011 | 0.007 | 59830 | 1.6E-01 | -3.18 | 1.4E-03 |
| rs11954519 | 5  | 39938122  | <i>DAB2</i>     | a | t | -0.005 | 0.010 | 46480 | 6.0E-01 | -0.041 | 0.008 | 56627 | 4.6E-07 | 2.83  | 4.7E-03 |
| rs456867   | 5  | 55846849  | <i>ANKRD55</i>  | t | c | -0.015 | 0.011 | 49806 | 2.0E-01 | -0.046 | 0.009 | 60491 | 6.1E-07 | 2.19  | 2.8E-02 |
| rs1933737  | 6  | 116416980 | <i>FRK</i>      | t | c | 0.013  | 0.009 | 47607 | 1.8E-01 | 0.039  | 0.007 | 57561 | 5.8E-07 | -2.15 | 3.1E-02 |
| rs2244608  | 12 | 119901371 | <i>HNF1A</i>    | a | g | 0.008  | 0.009 | 49692 | 3.9E-01 | 0.040  | 0.007 | 59938 | 1.6E-07 | -2.72 | 6.6E-03 |
| rs12955983 | 18 | 56023969  | <i>MC4R</i>     | a | g | -0.024 | 0.010 | 46457 | 2.3E-02 | -0.042 | 0.008 | 56340 | 5.5E-07 | 1.42  | 1.6E-01 |

Effect estimates are provided from the discovery analyses. Gray font is used for non-replicating loci. \*p-value was  $<1*10^{-700}$

**Supplementary Table 10: All SNPs Associated with Gout at  $p < 1 \times 10^{-6}$**

Supplementary Table 10 is provided in a separate .xlsx document.



**Supplementary Table 11: Overall and Sex-Specific Associations with Prevalent and Incident Gout**

| SNP        | discovery sample | closest gene    | A1 | A2 | serum urate (mg/dl) |       |          | prevalent gout |         | incident gout |         | prevalent gout men |         | incident gout men |         | prevalent gout women |         | incident gout women |         |
|------------|------------------|-----------------|----|----|---------------------|-------|----------|----------------|---------|---------------|---------|--------------------|---------|-------------------|---------|----------------------|---------|---------------------|---------|
|            |                  |                 |    |    | effect              | s.e.  | p-value  | OR             | p-value | OR            | p-value | OR                 | p-value | OR                | p-value | OR                   | p-value | OR                  | p-value |
| rs1471633  | overall          | <i>PDZK1</i>    | a  | c  | 0.061               | 0.005 | 1.4E-26  | 1.02           | 6.1E-01 | 1.09          | 1.7E-01 | 1.02               | 7.2E-01 | 1.05              | 5.0E-01 | 1.00                 | 9.6E-01 | 1.16                | 1.6E-01 |
| rs11264341 | overall          | <i>TRIM46</i>   | t  | c  | -0.048              | 0.006 | 1.0E-14  | 0.92           | 1.9E-02 | 0.92          | 1.6E-01 | 0.95               | 2.5E-01 | 0.87              | 7.2E-02 | 0.90                 | 5.1E-02 | 1.02                | 8.8E-01 |
| rs1260326  | overall          | <i>GCKR</i>     | t  | c  | 0.077               | 0.006 | 1.3E-40  | 1.15           | 2.8E-05 | 1.12          | 6.9E-02 | 1.14               | 3.6E-03 | 1.15              | 7.1E-02 | 1.16                 | 5.7E-03 | 1.07                | 5.6E-01 |
| rs17050272 | overall          | <i>INHBB</i>    | a  | g  | 0.037               | 0.006 | 9.4E-09  | 1.03           | 5.1E-01 | 1.04          | 5.6E-01 | 1.04               | 5.0E-01 | 1.06              | 4.2E-01 | 1.04                 | 4.7E-01 | 0.98                | 8.8E-01 |
| rs2307394  | overall          | <i>ORC4L</i>    | t  | c  | -0.035              | 0.006 | 7.3E-09  | 0.94           | 6.1E-02 | 0.97          | 6.0E-01 | 0.92               | 8.0E-02 | 1.00              | 9.9E-01 | 0.94                 | 3.0E-01 | 0.91                | 3.8E-01 |
| rs6770152  | overall          | <i>SFMBT1</i>   | t  | g  | -0.048              | 0.006 | 2.7E-16  | 0.89           | 7.4E-04 | 0.91          | 1.3E-01 | 0.85               | 3.9E-04 | 0.93              | 3.1E-01 | 0.94                 | 2.3E-01 | 0.88                | 2.3E-01 |
| rs12498742 | overall          | <i>SLC2A9</i>   | a  | g  | 0.379               | 0.006 | 0*       | 1.57           | 5.2E-26 | 1.55          | 3.0E-08 | 1.65               | 3.1E-17 | 1.42              | 1.9E-04 | 1.49                 | 6.8E-09 | 1.89                | 9.7E-06 |
| rs11099098 | overall          | <i>FGF5</i>     | t  | g  | -0.033              | 0.006 | 7.6E-07  | 0.92           | 3.6E-02 | 1.01          | 9.3E-01 | 0.96               | 4.4E-01 | 1.00              | 9.6E-01 | 0.90                 | 8.1E-02 | 1.01                | 9.3E-01 |
| rs2231142  | overall          | <i>ABCG2</i>    | t  | g  | 0.221               | 0.009 | 4.4E-116 | 1.71           | 6.9E-33 | 1.83          | 6.6E-10 | 1.96               | 1.6E-29 | 1.94              | 3.2E-08 | 1.41                 | 4.3E-06 | 1.63                | 4.1E-03 |
| rs17632159 | overall          | <i>TMEM171</i>  | c  | g  | -0.038              | 0.006 | 2.0E-09  | 0.92           | 2.3E-02 | 0.89          | 9.7E-02 | 0.90               | 3.9E-02 | 0.88              | 1.2E-01 | 0.98                 | 7.8E-01 | 0.93                | 5.1E-01 |
| rs675209   | overall          | <i>RREB1</i>    | t  | c  | 0.063               | 0.006 | 1.4E-21  | 1.08           | 3.9E-02 | 1.14          | 9.0E-02 | 1.11               | 3.7E-02 | 1.09              | 3.5E-01 | 1.09                 | 1.6E-01 | 1.25                | 1.0E-01 |
| rs1165151  | overall          | <i>SLC17A1</i>  | t  | g  | -0.093              | 0.005 | 4.5E-60  | 0.86           | 9.1E-06 | 0.85          | 1.0E-02 | 0.89               | 7.5E-03 | 0.84              | 2.0E-02 | 0.87                 | 1.1E-02 | 0.88                | 2.6E-01 |
| rs729761   | overall          | <i>VEGFA</i>    | t  | g  | -0.046              | 0.006 | 3.1E-12  | 0.88           | 4.4E-04 | 0.85          | 2.2E-02 | 0.83               | 3.7E-04 | 0.78              | 4.8E-03 | 0.90                 | 8.2E-02 | 1.00                | 9.9E-01 |
| rs1178977  | overall          | <i>BAZ1B</i>    | a  | g  | 0.050               | 0.007 | 6.7E-12  | 1.13           | 4.5E-03 | 1.18          | 4.2E-02 | 1.10               | 1.1E-01 | 1.21              | 5.0E-02 | 1.14                 | 5.7E-02 | 1.11                | 4.6E-01 |
| rs10480300 | overall          | <i>PRKAG2</i>   | t  | c  | 0.032               | 0.006 | 9.4E-07  | 1.13           | 7.2E-04 | 0.97          | 7.0E-01 | 1.19               | 3.4E-04 | 1.03              | 7.5E-01 | 1.02                 | 6.8E-01 | 0.87                | 2.4E-01 |
| rs17786744 | overall          | <i>STC1</i>     | a  | g  | -0.031              | 0.005 | 8.8E-08  | 0.95           | 8.7E-02 | 0.89          | 7.4E-02 | 0.93               | 1.2E-01 | 0.96              | 5.6E-01 | 0.93                 | 1.8E-01 | 0.77                | 2.0E-02 |
| rs2941484  | overall          | <i>HNF4G</i>    | t  | c  | 0.049               | 0.006 | 3.9E-17  | 1.02           | 5.0E-01 | 1.11          | 1.0E-01 | 1.04               | 3.7E-01 | 1.00              | 9.7E-01 | 1.02                 | 6.8E-01 | 1.37                | 3.5E-03 |
| rs10813960 | overall          | <i>B4GALT1</i>  | t  | c  | -0.033              | 0.006 | 7.9E-07  | 0.91           | 1.8E-02 | 0.94          | 3.6E-01 | 0.92               | 1.1E-01 | 1.03              | 7.3E-01 | 0.90                 | 1.1E-01 | 0.78                | 3.7E-02 |
| rs10821905 | overall          | <i>A1CF</i>     | a  | g  | 0.053               | 0.007 | 3.4E-12  | 1.10           | 2.9E-02 | 1.06          | 4.5E-01 | 1.13               | 4.5E-02 | 1.04              | 6.9E-01 | 1.10                 | 1.5E-01 | 1.10                | 4.6E-01 |
| rs1171614  | overall          | <i>SLC16A9</i>  | t  | c  | -0.074              | 0.007 | 6.5E-23  | 0.95           | 2.9E-01 | 0.79          | 3.0E-03 | 0.93               | 2.5E-01 | 0.73              | 1.6E-03 | 1.03                 | 6.3E-01 | 0.91                | 4.9E-01 |
| rs1493664  | overall          | <i>LUZP2</i>    | t  | c  | -0.029              | 0.006 | 8.3E-07  | 0.98           | 5.6E-01 | 0.88          | 3.4E-02 | 0.98               | 6.7E-01 | 0.84              | 2.1E-02 | 1.00                 | 9.3E-01 | 0.96                | 6.9E-01 |
| rs2078267  | overall          | <i>SLC22A11</i> | t  | c  | -0.078              | 0.006 | 8.7E-36  | 0.86           | 4.4E-06 | 0.96          | 5.5E-01 | 0.85               | 2.8E-04 | 0.99              | 8.9E-01 | 0.89                 | 2.8E-02 | 0.91                | 4.1E-01 |
| rs478607   | overall          | <i>NRXN2</i>    | a  | g  | -0.049              | 0.007 | 5.3E-10  | 0.97           | 4.7E-01 | 0.96          | 6.4E-01 | 0.98               | 8.0E-01 | 0.94              | 5.8E-01 | 0.94                 | 3.7E-01 | 0.99                | 9.7E-01 |
| rs642803   | overall          | <i>OVOL1</i>    | t  | c  | -0.043              | 0.005 | 4.5E-14  | 0.91           | 6.8E-03 | 0.84          | 3.9E-03 | 0.89               | 8.8E-03 | 0.89              | 1.4E-01 | 0.93                 | 2.0E-01 | 0.73                | 3.4E-03 |
| rs2195525  | overall          | <i>USP2</i>     | t  | c  | -0.031              | 0.006 | 2.6E-07  | 0.94           | 9.8E-02 | 1.17          | 1.1E-02 | 0.94               | 2.2E-01 | 1.20              | 1.4E-02 | 0.93                 | 1.9E-01 | 1.10                | 3.6E-01 |
| rs3741414  | overall          | <i>INHBC</i>    | t  | c  | -0.071              | 0.007 | 9.8E-22  | 0.85           | 1.2E-04 | 0.95          | 5.0E-01 | 0.79               | 4.1E-05 | 0.90              | 3.0E-01 | 0.93                 | 2.8E-01 | 1.04                | 7.9E-01 |
| rs653178   | overall          | <i>ATXN2</i>    | t  | c  | -0.036              | 0.005 | 2.4E-10  | 0.95           | 7.2E-02 | 0.97          | 6.0E-01 | 0.95               | 2.9E-01 | 0.93              | 3.8E-01 | 0.92                 | 1.2E-01 | 1.04                | 7.4E-01 |
| rs584480   | overall          | <i>DACH1</i>    | t  | c  | -0.030              | 0.006 | 2.9E-07  | 0.94           | 8.6E-02 | 1.06          | 3.8E-01 | 0.93               | 1.3E-01 | 1.07              | 3.5E-01 | 0.94                 | 2.8E-01 | 1.02                | 8.3E-01 |
| rs4777542  | overall          | <i>ADPGK</i>    | t  | c  | -0.033              | 0.006 | 1.5E-07  | 0.95           | 1.5E-01 | 1.04          | 5.1E-01 | 0.96               | 4.0E-01 | 0.97              | 7.1E-01 | 1.00                 | 9.9E-01 | 1.21                | 9.7E-02 |

|            |           |                 |   |   |        |       |         |      |         |      |         |      |         |      |         |      |         |      |         |
|------------|-----------|-----------------|---|---|--------|-------|---------|------|---------|------|---------|------|---------|------|---------|------|---------|------|---------|
| rs1394125  | overall   | <i>UBE2Q2</i>   | a | g | 0.043  | 0.006 | 9.8E-11 | 1.03 | 4.2E-01 | 1.03 | 6.3E-01 | 1.09 | 7.2E-02 | 1.07 | 4.1E-01 | 0.94 | 2.9E-01 | 0.97 | 7.5E-01 |
| rs6598541  | overall   | <i>IGF1R</i>    | a | g | 0.044  | 0.006 | 5.2E-13 | 1.06 | 7.9E-02 | 0.95 | 4.3E-01 | 1.09 | 6.4E-02 | 0.92 | 2.7E-01 | 0.98 | 6.7E-01 | 1.02 | 8.5E-01 |
| rs7193778  | overall   | <i>NFAT5</i>    | t | c | -0.047 | 0.008 | 2.4E-08 | 0.91 | 3.5E-02 | 0.94 | 5.2E-01 | 0.84 | 4.7E-03 | 0.97 | 8.0E-01 | 1.01 | 9.1E-01 | 0.89 | 4.5E-01 |
| rs7188445  | overall   | <i>MAF</i>      | a | g | -0.032 | 0.006 | 1.2E-07 | 0.98 | 4.8E-01 | 0.87 | 4.0E-02 | 0.96 | 3.9E-01 | 0.88 | 1.1E-01 | 1.01 | 8.6E-01 | 0.86 | 2.0E-01 |
| rs7224610  | overall   | <i>HLF</i>      | a | c | -0.038 | 0.006 | 4.7E-11 | 0.95 | 1.4E-01 | 0.98 | 7.5E-01 | 0.96 | 4.1E-01 | 1.12 | 1.6E-01 | 0.91 | 6.6E-02 | 0.77 | 1.3E-02 |
| rs2079742  | overall   | <i>BCAS3</i>    | t | c | 0.051  | 0.008 | 6.2E-09 | 1.06 | 2.4E-01 | 0.98 | 8.7E-01 | 1.00 | 9.7E-01 | 0.96 | 7.4E-01 | 1.18 | 4.3E-02 | 1.04 | 8.3E-01 |
| rs164009   | overall   | <i>QRICH2</i>   | a | g | 0.029  | 0.006 | 7.1E-07 | 1.09 | 6.7E-03 | 1.04 | 5.3E-01 | 1.08 | 9.1E-02 | 1.08 | 2.8E-01 | 1.12 | 4.2E-02 | 0.95 | 6.3E-01 |
| rs1035942  | overall   | <i>INSR</i>     | a | g | 0.033  | 0.006 | 2.2E-07 | 1.01 | 7.4E-01 | 0.97 | 6.4E-01 | 1.02 | 6.3E-01 | 0.97 | 6.8E-01 | 0.99 | 8.1E-01 | 0.97 | 8.3E-01 |
| rs4149178  | candidate | <i>SLC22A7</i>  | a | g | -0.032 | 0.008 | 1.9E-05 | 0.96 | 3.8E-01 | 0.92 | 3.2E-01 | 0.97 | 6.8E-01 | 0.89 | 2.8E-01 | 0.97 | 6.5E-01 | 0.97 | 8.4E-01 |
| rs11757159 | men       | <i>HLA-DRB5</i> | t | c | -0.048 | 0.009 | 3.6E-07 | 0.94 | 2.0E-01 | 0.93 | 3.9E-01 | 0.94 | 2.0E-01 | 0.93 | 3.9E-01 | 1.00 | 9.8E-01 | 0.85 | 1.5E-01 |
| rs11954519 | women     | <i>DAB2</i>     | a | t | -0.041 | 0.008 | 4.6E-07 | 0.98 | 7.2E-01 | 0.89 | 3.2E-01 | 1.03 | 5.0E-01 | 0.99 | 8.9E-01 | 0.98 | 7.2E-01 | 0.89 | 3.2E-01 |
| rs456867   | women     | <i>ANKRD55</i>  | t | c | -0.046 | 0.009 | 6.1E-07 | 0.95 | 4.5E-01 | 1.07 | 6.3E-01 | 0.94 | 2.6E-01 | 1.03 | 8.0E-01 | 0.95 | 4.5E-01 | 1.07 | 6.3E-01 |
| rs1933737  | women     | <i>FRK</i>      | t | c | 0.039  | 0.007 | 5.8E-07 | 1.01 | 9.1E-01 | 0.70 | 5.2E-03 | 1.03 | 5.6E-01 | 0.96 | 6.7E-01 | 1.01 | 9.1E-01 | 0.70 | 5.2E-03 |
| rs2244608  | women     | <i>HNF1A</i>    | a | g | 0.040  | 0.007 | 1.6E-07 | 1.04 | 5.5E-01 | 1.16 | 2.0E-01 | 1.01 | 7.7E-01 | 0.88 | 1.1E-01 | 1.04 | 5.5E-01 | 1.16 | 2.0E-01 |
| rs12955983 | women     | <i>MC4R</i>     | a | g | -0.042 | 0.008 | 5.5E-07 | 1.02 | 7.3E-01 | 0.90 | 3.8E-01 | 0.94 | 1.8E-01 | 0.96 | 6.1E-01 | 1.02 | 7.3E-01 | 0.90 | 3.8E-01 |

Serum urate estimates are provided for the discovery sample. Gray font is used for non-replicating loci. Abbreviations: A1: allele 1 = effect allele; se: standard error; OR: odds ratio

The Pearson correlation between effects for prevalent and incident gout in the overall sample was 0.92 for replicated loci.

**Supplementary Table 12: Overall and Sex-Specific Association between SNPs and Fractional Excretion of Uric Acid (FEUA)**

Supplementary Table 12 is provided in a separate .xlsx document.

**Supplementary Table 13: Associations of Urate-Associated SNPs in African Americans and Individuals of Indian and Japanese Ancestry**

Supplementary Table 13 is provided in a separate .xlsx document.

**Supplementary Table 14: Associations of Urate-Associated Index SNPs with Transcript Expression**

| eSNP       | Tissue                     | p-value expression | expression probe | transcript  | in cis | best eSNP for this transcript | r <sup>2</sup> between urate SNP and eSNP | urate SNP  | chr | bp (b36)  |
|------------|----------------------------|--------------------|------------------|-------------|--------|-------------------------------|-------------------------------------------|------------|-----|-----------|
| rs1967017  | Liver (UChicago)           | 1.9E-02            | A_23_P161064     | RNF115      | 1      | rs1967017                     | 1                                         | rs1471633  | 1   | 144435096 |
| rs4971100  | SubCutAdipose (Greenawalt) | 3.1E-07            | 10025903989      | MUC1        | 1      | rs4971100                     | 1                                         | rs11264341 | 1   | 153418117 |
| rs4971100  | SchadtLiver                | 2.2E-03            |                  | SLC39A1     | 1      | rs4971100                     | 1                                         | rs11264341 | 1   | 153418117 |
| rs1260326  | Liver (Greenawalt)         | 1.5E-09            | 10025904647      | C2orf16     | 1      | rs1260326                     | Same SNP                                  | rs1260326  | 2   | 27584444  |
| rs1260326  | Liver (UChicago)           | 1.2E-03            | A_24_P222890     | C2orf16     | 1      | rs1260326                     | Same SNP                                  | rs1260326  | 2   | 27584444  |
| rs1260326  | Liver (UWash)              | 2.0E-02            | 3780100          | C2orf16     | 1      | rs1260326                     | Same SNP                                  | rs1260326  | 2   | 27584444  |
| rs1260326  | Liver (Greenawalt)         | 1.9E-05            | 10023816200      | GCKR        | 1      | rs1260326                     | Same SNP                                  | rs1260326  | 2   | 27584444  |
| rs780094   | Liver (Greenawalt)         | 9.2E-13            | 10025914766      | HSS00291930 | 0      | rs780094                      | 0.93                                      | rs1260326  | 2   | 27584444  |
| rs780094   | Liver (Greenawalt)         | 4.1E-09            | 10025917899      | XM_212496   | 0      | rs780094                      | 0.93                                      | rs1260326  | 2   | 27584444  |
| rs780093   | Liver (UChicago)           | 4.7E-04            | A_23_P406135     | IFT172      | 1      | rs780093                      | 0.93                                      | rs1260326  | 2   | 27584444  |
| rs2911711  | Liver (UChicago)           | 6.0E-03            | A_23_P154058     | EIF2B4      | 1      | rs2911711                     | 0.81                                      | rs1260326  | 2   | 27584444  |
| rs1260333  | Liver (UChicago)           | 1.8E-02            | A_23_P433132     | KRTCAP3     | 1      | rs1260333                     | 0.81                                      | rs1260326  | 2   | 27584444  |
| rs17050272 | Liver (UChicago)           | 3.3E-06            | NA               | INHBB       | 1      | rs17050272                    | Same SNP                                  | rs17050272 | 2   | 121022910 |
| rs6706968  | Liver (Greenawalt)         | 2.4E-14            | 10023810057      | INHBB       | 1      | rs6706968                     | 0.97                                      | rs17050272 | 2   | 121022910 |
| rs6706968  | SchadtLiver                | 2.7E-05            |                  | INHBB       | 1      | rs6706968                     | 0.97                                      | rs17050272 | 2   | 121022910 |
| rs2307394  | omental                    | 2.3E-05            | 10023817882      | ACVR2A      | 1      | rs2307394                     | Same SNP                                  | rs2307394  | 2   | 148432898 |
| rs2307394  | Blood (Fehrmann et al)     | 3.7E-04            | 4590349          | ACVR2A      | 1      | rs12987286                    | Same SNP                                  | rs2307394  | 2   | 148432898 |
| rs12987286 | Blood (Fehrmann et al)     | 3.2E-04            | 4590349          | ACVR2A      | 1      | rs12987286                    | 1                                         | rs2307394  | 2   | 148432898 |
| rs12998729 | SubCutAdipose (Greenawalt) | 2.2E-07            | 10023817882      | ACVR2A      | 1      | rs12998729                    | 1                                         | rs2307394  | 2   | 148432898 |
| rs2890915  | Blood (Fehrmann et al)     | 3.7E-04            | 4590349          | ACVR2A      | 1      | rs12987286                    | 1                                         | rs2307394  | 2   | 148432898 |
| rs2288190  | SchadtLiver                | 7.1E-09            |                  | ACVR2A      | 1      | rs2288190                     | 0.84                                      | rs2307394  | 2   | 148432898 |
| rs6770152  | PrefrontalCortex           | 8.4E-08            | 200667_at        | UBE2D3      | 0      | rs6770152                     | Same SNP                                  | rs6770152  | 3   | 53075254  |
| rs2581795  | Liver (Greenawalt)         | 9.7E-05            | 10025902286      | RFT1        | 1      | rs2581795                     | 0.84                                      | rs6770152  | 3   | 53075254  |
| rs2231142  | Liver (Greenawalt)         | 2.2E-08            | 10033668963      | ABCG2       | 1      | rs2231142                     | Same SNP                                  | rs2231142  | 4   | 89271347  |

|            |                             |         |               |          |   |            |          |            |   |          |
|------------|-----------------------------|---------|---------------|----------|---|------------|----------|------------|---|----------|
| rs2231142  | Liver (Greenawalt)          | 7.4E-08 | 10023825941   | ABCG2    | 1 | rs2231142  | Same SNP | rs2231142  | 4 | 89271347 |
| rs2231142  | CR:Hunt                     | 1.8E-09 | 10023813305   | PKD2     | 1 | rs2231142  | Same SNP | rs2231142  | 4 | 89271347 |
| rs9393672  | VC:Alzh                     | 2.8E-06 | 10023817545   | HIST1H1C | 1 | rs9393672  | 1        | rs1165151  | 6 | 25929595 |
| rs942379   | CD4+lymph                   | 4.6E-06 |               | SLC17A3  | 1 | rs942379   | 0.97     | rs1165151  | 6 | 25929595 |
| rs11974409 | omental                     | 1.6E-08 | 10025910799   | BAZ1B    | 1 | rs11974409 | 1        | rs1178977  | 7 | 72494985 |
| rs11974409 | SubCutAdipose (Greenawalt)  | 3.3E-05 | 10025910799   | BAZ1B    | 1 | rs11974409 | 1        | rs1178977  | 7 | 72494985 |
| rs11974409 | Liver (UChicago)            | 4.5E-03 | A_23_P123010  | BCL7B    | 1 | rs11974409 | 1        | rs1178977  | 7 | 72494985 |
| rs11974409 | omental                     | 1.4E-25 | 10023816986   | MLXIPL   | 1 | rs11974409 | 1        | rs1178977  | 7 | 72494985 |
| rs11974409 | SubCutAdipose (Greenawalt)  | 2.6E-13 | 10025907760   | MLXIPL   | 1 | rs11974409 | 1        | rs1178977  | 7 | 72494985 |
| rs11974409 | SubCutAdipose (Greenawalt)  | 2.3E-11 | 10023816986   | MLXIPL   | 1 | rs11974409 | 1        | rs1178977  | 7 | 72494985 |
| rs11974409 | PFC:All                     | 3.6E-08 | 10023816719   | TBL2     | 1 | rs11974409 | 1        | rs1178977  | 7 | 72494985 |
| rs11974409 | SubCutAdipose (Greenawalt)  | 6.0E-06 | 10023816719   | TBL2     | 1 | rs11974409 | 1        | rs1178977  | 7 | 72494985 |
| rs11974409 | VC:All                      | 6.6E-06 | 10023816719   | TBL2     | 1 | rs11974409 | 1        | rs1178977  | 7 | 72494985 |
| rs6976930  | omental                     | 7.1E-22 | 10025907760   | MLXIPL   | 1 | rs11974409 | 1        | rs1178977  | 7 | 72494985 |
| rs10813960 | Liver (UChicago)            | 2.7E-02 | A_23_P146654  | BAG1     | 1 | rs10813960 | Same SNP | rs10813960 | 9 | 33170362 |
| rs10758192 | Lymphocytes                 | 1.6E-05 |               | APTX     | 1 | rs10758192 | 0.84     | rs10813960 | 9 | 33170362 |
| rs10813954 | BcellsTransformed_HapMapJPT | 1.0E-08 | GI_13929461-S | B4GALT1  | 1 | rs10813954 | 0.84     | rs10813960 | 9 | 33170362 |
| rs7036812  | BcellsTransformed_HapMapYRI | 7.2E-07 | GI_13929461-S | B4GALT1  | 1 | rs7036812  | 0.84     | rs10813960 | 9 | 33170362 |
| rs10758192 | Blood (Fehrmann et al)      | 2.5E-06 | 3460386       | B4GALT1  | 1 | rs10758192 | 0.84     | rs10813960 | 9 | 33170362 |
| rs10758192 | CD4+lymph                   | 4.5E-08 |               | B4GALT1  | 1 | rs10758192 | 0.84     | rs10813960 | 9 | 33170362 |
| rs913214   | LCL                         | 8.0E-21 | 216627_s_at   | B4GALT1  | 1 | rs913214   | 0.84     | rs10813960 | 9 | 33170362 |
| rs10113903 | BcellsTransformed_HapMapJPT | 3.7E-08 | GI_13929461-S | B4GALT1  | 1 | rs10813954 | 0.84     | rs10813960 | 9 | 33170362 |
| rs10124479 | BcellsTransformed_HapMapJPT | 3.7E-08 | GI_13929461-S | B4GALT1  | 1 | rs10813954 | 0.84     | rs10813960 | 9 | 33170362 |
| rs10738905 | BcellsTransformed_HapMapJPT | 3.7E-08 | GI_13929461-S | B4GALT1  | 1 | rs10813954 | 0.84     | rs10813960 | 9 | 33170362 |
| rs10813950 | BcellsTransformed_HapMapJPT | 2.6E-08 | GI_13929461-S | B4GALT1  | 1 | rs10813954 | 0.84     | rs10813960 | 9 | 33170362 |

|                   |                             |                |                    |               |          |                   |                 |                  |           |                  |
|-------------------|-----------------------------|----------------|--------------------|---------------|----------|-------------------|-----------------|------------------|-----------|------------------|
| rs10971419        | BcellsTransformed_HapMapJPT | 2.7E-08        | GI_13929461-S      | B4GALT1       | 1        | rs10813954        | 0.84            | rs10813960       | 9         | 33170362         |
| rs7036812         | BcellsTransformed_HapMapJPT | 1.1E-07        | GI_13929461-S      | B4GALT1       | 1        | rs10813954        | 0.84            | rs10813960       | 9         | 33170362         |
| rs7849148         | BcellsTransformed_HapMapJPT | 2.8E-08        | GI_13929461-S      | B4GALT1       | 1        | rs10813954        | 0.84            | rs10813960       | 9         | 33170362         |
| rs7865745         | BcellsTransformed_HapMapJPT | 3.7E-08        | GI_13929461-S      | B4GALT1       | 1        | rs10813954        | 0.84            | rs10813960       | 9         | 33170362         |
| rs10758192        | LCL                         | 7.2E-18        | 216627_s_at        | B4GALT1       | 1        | rs913214          | 0.84            | rs10813960       | 9         | 33170362         |
| <b>rs17300741</b> | <b>CR:Norm</b>              | <b>7.6E-05</b> | <b>10031920868</b> | <b>DNAJC4</b> | <b>1</b> | <b>rs17300741</b> | <b>0.98</b>     | <b>rs2078267</b> | <b>11</b> | <b>64090690</b>  |
| rs557675          | Liver(UChicago)             | 4.1E-02        | NA                 | DKFZp761E198  | 1        | rs557675          | 1               | rs642803         | 11        | 65317196         |
| rs557675          | CR:All                      | 4.5E-05        | 10023807485        | SLC29A2       | 1        | rs557675          | 1               | rs642803         | 11        | 65317196         |
| <b>rs653178</b>   | <b>CR:All</b>               | <b>9.6E-08</b> | <b>10023848139</b> | <b>CUX2</b>   | <b>1</b> | <b>rs653178</b>   | <b>Same SNP</b> | <b>rs653178</b>  | <b>12</b> | <b>110492139</b> |
| rs3184504         | Liver(Greenawalt)           | 4.6E-26        | 10023848139        | AL049919      | 1        | rs3184504         | 1               | rs653178         | 12        | 110492139        |
| rs3184504         | PFC:All                     | 5.2E-41        | 10023848139        | CUX2          | 1        | rs3184504         | 1               | rs653178         | 12        | 110492139        |
| rs3184504         | PFC:Alzh                    | 3.2E-15        | 10023848139        | CUX2          | 1        | rs3184504         | 1               | rs653178         | 12        | 110492139        |
| rs3184504         | PFC:Hunt                    | 9.4E-17        | 10023848139        | CUX2          | 1        | rs3184504         | 1               | rs653178         | 12        | 110492139        |
| rs3184504         | PFC:Norm                    | 7.0E-11        | 10023848139        | CUX2          | 1        | rs3184504         | 1               | rs653178         | 12        | 110492139        |
| rs3184504         | VC:All                      | 6.1E-29        | 10023848139        | CUX2          | 1        | rs3184504         | 1               | rs653178         | 12        | 110492139        |
| rs3184504         | VC:Alzh                     | 9.7E-09        | 10023848139        | CUX2          | 1        | rs3184504         | 1               | rs653178         | 12        | 110492139        |
| rs3184504         | VC:Hunt                     | 1.8E-12        | 10023848139        | CUX2          | 1        | rs3184504         | 1               | rs653178         | 12        | 110492139        |
| rs3184504         | Blood                       | 2.0E-04        | HSG00276844        | FLJ21127      | 1        | rs3184504         | 1               | rs653178         | 12        | 110492139        |
| rs2650000         | Liver(Greenawalt)           | 2.3E-11        | 10023836323        | LRRC19        | 0        | rs2650000         | 0.92            | rs2244608        | 12        | 119901371        |

The table only shows eSNPs for which the best eSNP for a given transcript is the same as or in perfect LD with the serum urate index SNP. Bold lines indicate alternating loci, whereas gray font indicates loci that did not replicate. The definition of *cis* varies somewhat across the datasets and is defined in the references describing the underlying expression datasets.

**Supplementary Table 15: Association of Replicated Urate-Associated SNPs with Related Phenotypes**

Supplementary Table 15 is provided in a separate .xlsx document.

**Supplementary Table 16: Results from GRAIL Analyses of Urate-Associated SNPs from the Discovery Step**

| <b>SNP</b> | <b>closest gene</b> | <b>GRAIL gene</b> | <b>GRAIL p-value</b> |
|------------|---------------------|-------------------|----------------------|
| rs12498742 | <i>SLC2A9</i>       | <i>SLC2A9</i>     | 9.8E-09              |
| rs1165151  | <i>SLC17A1</i>      | <i>SLC17A3</i>    | 3.1E-08              |
| rs478607   | <i>NRXN2</i>        | <i>SLC22A12</i>   | 3.3E-08              |
| rs1171614  | <i>SLC16A9</i>      | <i>SLC16A9</i>    | 6.6E-07              |
| rs1260326  | <i>GCKR</i>         | <i>GCKR</i>       | 2.3E-06              |
| rs2231142  | <i>ABCG2</i>        | <i>ABCG2</i>      | 8.6E-06              |
| rs2078267  | <i>SLC22A11</i>     | <i>SLC22A11</i>   | 6.7E-05              |
| rs1178977  | <i>BAZ1B</i>        | <i>MLXIPL</i>     | 1.1E-04              |
| rs4777542  | <i>ADPGK</i>        | <i>ADPGK</i>      | 1.6E-04              |
| rs1471633  | <i>PDZK1</i>        | <i>PDZK1</i>      | 9.1E-04              |
| rs2307394  | <i>ORC4L</i>        | <i>ACVR2A</i>     | 1.1E-03              |
| rs17050272 | <i>INHBB</i>        | <i>INHBB</i>      | 2.1E-03              |
| rs1035942  | <i>INSR</i>         | <i>INSR</i>       | 3.2E-03              |
| rs6598541  | <i>IGF1R</i>        | <i>IGF1R</i>      | 4.2E-03              |
| rs3741414  | <i>INHBC</i>        | <i>INHBE</i>      | 8.7E-03              |
| rs17786744 | <i>STC1</i>         | <i>STC1</i>       | 5.6E-02              |
| rs11264341 | <i>TRIM46</i>       | <i>PKLR</i>       | 5.9E-02              |
| rs2941484  | <i>HNF4G</i>        | <i>HNF4G</i>      | 6.9E-02              |
| rs1394125  | <i>UBE2Q2</i>       | <i>NRG4</i>       | 1.5E-01              |
| rs7188445  | <i>MAF</i>          | <i>MAF</i>        | 1.6E-01              |
| rs11099098 | <i>FGF5</i>         | <i>FGF5</i>       | 1.9E-01              |
| rs10480300 | <i>PRKAG2</i>       | <i>PRKAG2</i>     | 2.0E-01              |
| rs653178   | <i>ATXN2</i>        | <i>PTPN11</i>     | 2.1E-01              |
| rs584480   | <i>DACH1</i>        | <i>DACH1</i>      | 2.3E-01              |
| rs2079742  | <i>BCAS3</i>        | <i>C17orf82</i>   | 2.3E-01              |
| rs642803   | <i>OVOL1</i>        | <i>LTBP3</i>      | 3.0E-01              |
| rs10813960 | <i>B4GALT1</i>      | <i>B4GALT1</i>    | 4.3E-01              |
| rs2195525  | <i>USP2</i>         | <i>MFRP</i>       | 4.8E-01              |
| rs729761   | <i>VEGFA</i>        | <i>VEGFA</i>      | 5.4E-01              |
| rs17632159 | <i>TMEM171</i>      | <i>TMEM171</i>    | 6.0E-01              |
| rs6770152  | <i>SFMBT1</i>       | <i>MUSTN1</i>     | 6.1E-01              |
| rs7224610  | <i>HLF</i>          | <i>HLF</i>        | 6.6E-01              |
| rs7193778  | <i>NFAT5</i>        | <i>NFAT5</i>      | 7.0E-01              |
| rs10821905 | <i>A1CF</i>         | <i>ASA2</i>       | 7.9E-01              |
| rs675209   | <i>RREB1</i>        | <i>RREB1</i>      | 9.6E-01              |
| rs164009   | <i>QRICH2</i>       | <i>PRPSAP1</i>    | 9.7E-01              |
| rs1493664  | <i>LUZP2</i>        | N/A               | N/A                  |

Keywords describing the functional connections between the loci were 'activin', 'insulin', 'transporter', 'glucose', 'organic', 'anion', 'growth', 'renal', 'diabetes', 'serum', 'vegf', 'liver', 'pyruvate', 'factor', 'transporters', 'kidney', 'receptor', 'hepatocyte', 'type', and 'levels'.



**Supplementary Table 17: Functional Network Associations Underlying  
Supplementary Figure 8 and Supplementary Figure 9**

Supplementary Table 17 is provided in a separate .xlsx document.

**Supplementary Table 18: Associated Pathways, Processes or Functions ( $p < 1 \times 10^{-3}$ ) Based on the Results from Ingenuity Pathway Analysis**

| Data base    | set                                                                            | alternative set/ name | nominal p-value | genes associated with serum urate in the discovery screen                                                                                                                                                                                                                               |
|--------------|--------------------------------------------------------------------------------|-----------------------|-----------------|-----------------------------------------------------------------------------------------------------------------------------------------------------------------------------------------------------------------------------------------------------------------------------------------|
| Networks     | Gene Expression, Cell Cycle, Cellular Assembly and Organization                |                       | 1.0E-28         | ABCG2, ABCG5, ARID1A, B4GALT1, BAZ1A, BAZ1B, BAZ2A, BCAS3, CAPZB, DACH1, DEK, FGF5, MBD5, mir-153, mir-154, mir-664, MYBBP1A, MYC, NEUROD1, ORC4, PIM1, R3HDM2, RREB1, SCD, SF3B1, SLC16A9, SLC17A4, SLC2A9, SLK, SMARCC2, SMARCE1, SOCS2, TRIM38, UBE2U, ZNF274                        |
| Networks     | Carbohydrate Metabolism, Small Molecule Biochemistry, Molecular Transport      |                       | 1.0E-28         | A1CF, ABCC2, ACACB, ADPGK, AP3D1, ATXN2, CLCN3, DLG4, EP300, GCKR, GTF3C1, GTF3C2, GTF3C3, GTF3C5, HNF4A, KHSRP, KLHL17, MAST2, mir-1, MLXIPL, MTX1, PDZK1, PEPCK, PKLR, PRPSAP1, PYGL, SAMM50, SLC17A, SLC17A1, SLC17A2, SLC22A11, TNPO2, TRAF6, TRIM46, USP2                          |
| Networks     | Gene Expression, Cellular Movement, Cellular Compromise                        |                       | 1.0E-23         | ADAM17, BATF3, BBS4, CEBPG, CELF2, DCN, EEA1, ERBB4, ERBB4 ligand, FOXA1, GALNT4, GIGYF1, HLF, HNF4G, KHSRP, LCP1, LMO2, MGRN1, mir-329, mir-379, mir-515, MUC1, NFAT5, NRG, NRG4, NRXN2, PDLIM5, QRICH2, RORB, SFMBT1, SNAI1, STC1, SUPT16H, UBE2Q2, ZNF512                            |
| Networks     | Carbohydrate Metabolism, Molecular Transport, Endocrine System Disorders       |                       | 1.0E-20         | ACVR2A, ASAH2B, BAZ1A, BCL7B, DCN, EEA1, EHD1, EHD2, Focal adhesion kinase, GIPC1, GNAI1, IGF1R, INHBC, inhibin, INSR, Insulin, Irs3, IRS1/2, JAK1/2, mir-320, mir-491, mir-590, OVOL1, PDLIM5, PDPK1, PI3K (complex), PIK3C2B, PRKAG2, SH2B1, SH2B2, SH2B3, SLC17A3, SND1, TBL2, USP44 |
| BioFunctions | Cellular Development/developmental process/developmental process of apud cells |                       | 1.6E-05         | IGF1R, INSR, NRG4                                                                                                                                                                                                                                                                       |

|              |                                                                                      |                                                                                                                                                                                                                                |         |                                        |
|--------------|--------------------------------------------------------------------------------------|--------------------------------------------------------------------------------------------------------------------------------------------------------------------------------------------------------------------------------|---------|----------------------------------------|
| BioFunctions | Cellular Development/developmental process/developmental process of islet cells      |                                                                                                                                                                                                                                | 2.3E-05 | IGF1R, INSR, NRG4                      |
| BioFunctions | Organ Morphology/size/size of exocrine region of pancreas                            |                                                                                                                                                                                                                                | 5.2E-05 | IGF1R, INSR                            |
| BioFunctions | Tissue Development/developmental process/developmental process of quadriceps femoris |                                                                                                                                                                                                                                | 5.2E-05 | ACVR2A, STC1                           |
| BioFunctions | Tissue Development/developmental process/developmental process of gastrocnemius      |                                                                                                                                                                                                                                | 8.7E-05 | ACVR2A, STC1                           |
| BioFunctions | Carbohydrate Metabolism/transport/transport of carbohydrate                          | Molecular Transport/transport/transport of carbohydrate                                                                                                                                                                        | 1.0E-04 | B4GALT1, INSR, PRKAG2, SLC17A3, SLC2A9 |
| BioFunctions | Cellular Development/development/development of apud cells                           | Cellular Development/development/development of islet cells; Endocrine System Development and Function/development/development of apud cells; Endocrine System Development and Function/development/development of islet cells | 1.3E-04 | IGF1R, NRG4                            |
| BioFunctions | Carbohydrate Metabolism/glycolysis/glycolysis of cells                               |                                                                                                                                                                                                                                | 1.5E-04 | INSR, MLXIPL, PRKAG2                   |
| BioFunctions | Carbohydrate Metabolism/import/import of carbohydrate                                | Molecular Transport/import/import of carbohydrate                                                                                                                                                                              | 2.8E-04 | B4GALT1, INSR, PRKAG2                  |
| BioFunctions | Cell Death/self-renewal/self-                                                        |                                                                                                                                                                                                                                | 4.7E-04 | IGF1R, MUC1                            |

|              |                                                                                      |                                                                        |         |                               |
|--------------|--------------------------------------------------------------------------------------|------------------------------------------------------------------------|---------|-------------------------------|
|              | renewal of cell lines                                                                |                                                                        |         |                               |
| BioFunctions | Carbohydrate Metabolism/transport/transport of monosaccharide                        | Molecular Transport/transport/transport of monosaccharide              | 5.0E-04 | INSR, PRKAG2, SLC17A3, SLC2A9 |
| BioFunctions | Carbohydrate Metabolism/synthesis/synthesis of glycogen                              |                                                                        | 6.8E-04 | GCKR, IGF1R, INSR             |
| BioFunctions | Cellular Development/developmental process/developmental process of beta islet cells |                                                                        | 7.7E-04 | IGF1R, INSR                   |
| BioFunctions | Embryonic Development/sex determination/sex determination of organism                | Organismal Development/sex determination/sex determination of organism | 8.9E-04 | IGF1R, INSR                   |

All genes written in gray font belong to the specified network (as selected by IPA algorithm) but were not included in the input gene set.

## Supplementary Note

### **Participating Studies**

**Studies included in the meta-analysis of serum urate GWAS:** AGES Reykjavik Study, Amish, ARIC, ASPS, AUSTWIN, BLSA, BRIGHT, CARDIA, CHS, CoLaus, CROATIA-KORCULA, CROATIA-SPLIT, CROATIA-VIS, DESIR, EPIC-Norfolk cohort, ERF, Estonian Biobank, Family Heart Study, Framingham Heart Study, Health 2000, InCHIANTI, INCIPE, INGI-Carlantino, INGI-CILENTO, INGI-FVG, INGI-Val Borbera, KORA F3, KORA F4, LBC1936, Lifelines, LOLIPOP EW\_A, LOLIPOP EW\_P, LOLIPOP EW610, LURIC, MICROS, NESDA, NSPHS, ORCADES, PREVEND, PROCARDIS, RS-I, RS-II, SardinIA, SHIP, SOCCS, Sorbs, TwinsUK, and Young Finns Study.

**Studies included in the meta-analysis of gout GWAS:** AGES Reykjavik Study, ARIC, ASPS, CHS, CoLaus, CROATIA-VIS, EPIC-Norfolk cohort, Framingham Heart Study, KORA F3, KORA F4, RS-I, RS-II, SHIP, and WGHS.

**Replication studies with *in silico* GWAS data:** EPIC cases, GHS I, GHS II, GSK, Hunter Community Study, Lifelines replication sample, LURIC GZ, LURIC HD, MARS, OGP Talana, SAPALDIA, SHIP-Trend.

**Replication studies with *de novo* genotype data:** HYPEST, KORA S2, and Ogliastra Genetic Park

**Additional study samples:** incident gout (HPFS and NHS), Indian ancestry (LOLIPOP), African Americans (ARIC, CARDIA, JHS from the CARE study<sup>181</sup>), Japanese ancestry (BioBank Japan).

### **Statistical Methods of Secondary Analyses**

#### **Analyses of the X Chromosome**

X chromosome analyses were conducted in 19 studies with imputed data (AGES, ARIC, CHS, CoLaus, EPIC-Norfolk cohort, ERF, Estonian Biobank, FHS, INCIPE, INGI-CILENTO, INGI-Val Borbera, KORA F3, KORA F4, LBC1936, NESDA, RS-I, RS-II, SardinIA, SHIP) and 6 studies with X chromosomal data available for genotyped SNPs only (Amish, AUSTWIN, BLSA, InCHIANTI, INGI-Carlantino, INGI-FVG). Imputation was performed using MACH<sup>182</sup> or IMPUTE<sup>183</sup> using the HapMap2 reference panel. Association tests were carried out similarly to the ones for autosomal SNPs, with men coded as homozygotes for their X chromosomal allele. Quality checks and meta-analysis were performed as for the autosomal analysis, but additional filters for MAF <5% and heterogeneity p-value <5\*10<sup>-8</sup> were applied to the results. In total, 54,926 SNPs were analyzed in up to n=72,026 samples in the overall analysis, and separately for 52,897 SNPs in n=39,212 women and 55,210 SNPs in n=31,086 men.

## Analysis of Sex-Interactions

Genome-wide sex-interactions on the serum urate effect sizes were obtained by comparing, for each SNP, the discovery meta-analysis results from men ( $n=49,825$ ) and women ( $n=60,522$ ) using a  $t$ -test. Test statistics were calculated using the formula  $t = (\beta_{\text{men}} - \beta_{\text{women}}) / \sqrt{SE_{\text{men}}^2 + SE_{\text{women}}^2}$ , assuming independent effect sizes between men and women. The correlation of the sex-stratified effect estimates using the whole dataset excluding the known urate-associated loci was  $r=0.08$ . Taking this correlation during computation of the combined SEs into account affected the estimation of sex-specific differences only marginally.

An alternative method consisting of a meta-analysis of the sex-differences within each cohort was also performed using the 45 populations for which both male and female-specific effects were available. The sex-difference was calculated as the difference between the female-specific effect and the male-specific effect in each population separately with the associated standard error for the difference estimate calculated as  $\sqrt{SE_{\text{men}}^2 + SE_{\text{women}}^2}$ ,  $SE_{\text{men}}$  and  $SE_{\text{women}}$  being the genomic-control corrected standard errors of the SNP sex-specific estimates. An inverse-variance weighted meta-analysis of the sex-differences was performed using METAL<sup>184</sup>. The results were almost identical to those of the first analysis and are therefore not presented.

## Gene-based Test

A gene-based test was conducted using the VEGAS software<sup>185</sup>. Briefly, this method assigns SNPs to genes and combines the association  $p$ -values accounting for LD between markers assigned to the same gene. Analyses were conducted using both urate and gout discovery meta-analysis datasets as input files. Genes with permutation  $p$ -values  $<10^{-6}$  were manually reviewed for the presence of a common SNP in a gene that had not been identified in the primary meta-analysis. One such region was identified on chromosome 15, with SNP rs10851850 in *GRAMD2* having the lowest urate-associated  $p$ -value and a MAF of 0.28. The SNP was however not included in the final replication list because it was not independent of the nearby urate-associated variant rs4777542.

## Evaluation of Evidence for Novel Urate Transporters

To evaluate the presence of potentially novel urate transport proteins that contain SNPs associated with serum urate at a sub-genome-wide significance level, we queried homologues of known urate transporters identified in GWAS for the presence of associated SNPs. We systematically interrogated SNPs in the ABC protein family (50 genes, known urate transporter encoded by *ABCG2*), the SLC2A family (14 genes, known urate transporter encoded by *SLC2A9*), the SLC17A family (9 genes, known urate transporters encoded by *SLC17A1* and *SLC17A3*), and the SLC22A family (23 genes, known urate transporters encoded by *SLC22A11*, *SLC22A12*). The number of independent SNPs in these 96 genes was estimated as 1759, using the HapMap2 and HapMap3 CEU r28 population as the reference. Analyses were conducted using the plink --indep option, including variants up to both 20 kb up- and downstream of each gene, 50 SNPs at a time, a window size of 5, and an  $r^2$  of 0.5 to indicate independence. Based on a Bonferroni correction for 1759 variants, significant association was defined as  $p$ -value

$<2.8 \times 10^{-5}$ . One gene region contained a variant meeting this threshold in association with urate, rs4149178 in *SLC22A7* ( $p=1.9 \times 10^{-5}$ ) and was therefore selected for replication.

### **Risk Score Analyses**

A genetic risk score was generated to evaluate the combined effect of urate-increasing alleles on the risk of gout. The score was based on the 29 SNPs presented in **Supplementary Table 6** that showed an urate association p-value  $<1 \times 10^{-6}$  in the discovery stage and a decreased p-value after combining discovery and replication data. The number of urate-increasing alleles an individual carries at each of these loci was multiplied with the effect size of the respective allele from the discovery meta-analysis and summed across all loci. This estimate was then scaled by multiplying it by the number of SNPs divided by the sum of the effect sizes, to derive an individual's risk score that had a comparable range to a risk allele count. The risk score was then related to gout in three large population-based studies (ARIC, KORA F4, and SHIP;  $n=693$  cases and  $n=11,714$  controls) as well as in two independent nested case-control studies of incident gout over up to 22 years that were not part of the urate discovery analyses (NHS and HPFS;  $n=1,036$  cases and  $n=1,091$  controls). Logistic regression was used to estimate the odds ratio of gout per risk score unit increase. All models were adjusted for age and sex and study center if applicable. The proportion of individuals in each risk score category (rounded to the nearest integer) was calculated.

*The following secondary analyses (f. to i.) were conducted for 44 SNPs identified for replication testing from the GWAS discovery meta-analyses (37 SNPs from urate overall), and from GWAS secondary analyses (1 for men, 5 for women, 1 for urate transporters), in order to better characterize the associations. The association with other traits is evaluated only for the 26 replicated loci from the overall analysis.*

### **Association with the Fractional Excretion of Uric Acid (FEUA)**

Urinary urate measures for the calculation of FEUA were available in the CROATIA-Split, CROATIA-Korcula, Hercules, PREVEND and Val Borbera studies. FEUA (%) was calculated, using the same units for the serum and urine measures, as  $([\text{urine urate}] \times [\text{serum creatinine}] \times 100) / ([\text{serum urate}] \times [\text{urine creatinine}])$ . Prior to analysis, FEUA was rank-transformed and age- and sex-adjusted residuals were obtained, with additional adjustment for study center and the first three principal components if necessary. These residuals were then related to each of urate-associated SNPs moved forward for replication using an additive genetic model and the dosages of the genotypes. Results from the individual studies were combined using an inverse-variance weighted meta-analysis. Results from a z-score based meta-analysis were comparable. As the purpose of this analysis was to help elucidate the physiological mechanism by which these urate-associated SNPs may influence serum urate levels, an alpha of 0.05 was used to indicate statistical significance.

## **Association in Individuals of non-European Ancestries**

To evaluate the generalizability of the urate-associated SNPs from the discovery stage, the SNPs were investigated in study samples of non-European ancestry as detailed in the **Methods**. Urate associations were estimated following the same statistical procedures and models as in the discovery cohorts.

## **Expression SNP (eSNP) Analyses**

For each of the 44 sentinel QT SNPs all proxy SNPs with  $r^2 > 0.8$  were identified in HapMap CEU (releases 21, 22, and HapMap 3 vers. 2) using SNAP1 <http://www.broadinstitute.org/mpg/snap/>. Published associations between gene transcript levels and the genotype of nearby SNPs *in cis* for a wide spectrum of tissue/cell types were interrogated to assess the potential of the replicating candidate SNPs for eSNPs to influence gene expression. The tissues and cell types with available data were: fresh lymphocytes<sup>186</sup>, fresh leukocytes<sup>187</sup>, leukocyte samples in individuals with celiac disease<sup>188</sup>, lymphoblastoid cell lines (LCL) derived from asthmatic children<sup>189</sup>, HapMap LCL from 3 populations<sup>190</sup>, a separate study on HapMap CEU LCL<sup>191</sup>, peripheral blood monocytes<sup>79,192</sup>, omental and subcutaneous adipose<sup>193,194</sup> and whole blood samples<sup>193,195</sup>, 2 studies on brain cortex<sup>175,192</sup>, 3 large studies of brain regions including prefrontal cortex, visual cortex and cerebellum (Emilsson, personal communication), liver<sup>194,196,197</sup>, osteoblasts<sup>198</sup>, skin<sup>199</sup> and additional fibroblast, T cell and LCL samples<sup>200</sup>. For each tissue or cell type, the citation describes the study-specific statistical criterion for establishing significant SNP associations. Only instances where a significant eSNP or a perfect proxy thereof was the eSNP with the lowest p-value for association with that transcript in the respective study are shown in **Supplementary Table 14**.

## **Associations of Urate-associated SNPs with Other Traits**

We queried all 26 replicated urate-associated SNPs for their association with plasma C-reactive protein (CRP), systolic and diastolic blood pressure (SBP, DBP), stroke, myocardial infarction (MI), fasting glucose, fasting insulin, HOMA-B, HOMA-IR, 2-hour glucose and diabetes mellitus in GWAS results of other consortia. CRP was looked up in a dataset of  $n=66,185$  participants of European ancestry<sup>201</sup>. The association between the urate SNPs and systolic and diastolic blood pressure was conducted among an effective sample size of  $n=46,356-69,815$  individuals of European ancestry as published by the ICBP Consortium<sup>202</sup>. The association of the urate SNPs with stroke was looked up the datasets described in<sup>203-206</sup>. Associations with MI were looked up in GWAS data of CARDIoGRAM<sup>207</sup>. Data on glycaemic traits have been contributed by MAGIC investigators and have been downloaded from <http://www.magicinvestigators.org>, and data for association with type 2 diabetes were provided by the DIAGRAM Consortium<sup>208</sup>.

To assess the combined effect of the urate-associated variants on these additional phenotypes, a genetic risk score was computed based on the 26 replicated SNPs using the method described previously<sup>202</sup>, and related to the additional outcomes. Briefly, the regression on the risk score can be calculated using the regression effects and standard errors of each SNP on the corresponding phenotype, without further access to individual-level data. The coefficient and standard error of



the risk score is a weighted mean of these per-SNP regression coefficients (matched to the urate-increasing allele) and the combined squared standard errors, respectively, where each is weighted by the effect size of the respective allele from the urate discovery meta-analysis. Using this method, the risk score was estimated and tested using the same statistical model and covariates as applied in the SNP specific analysis of the corresponding phenotype.

### **Pathway-based Analyses**

To identify functional connections between the implicated genes and to test for the overrepresentation of certain gene sets, two approaches were used:

First, we incorporated pathway information via functional connections, most of them protein-protein interactions. For each of the 37 SNPs with p-values  $<1*10^{-6}$  in the overall serum urate GWAS, we first identified the gene most likely to underlie the reported association using the Gene Relationships Among Implicated Loci (GRAIL) method<sup>209</sup>. Briefly, GRAIL determines one gene, which most likely underlies the observed association, along with an estimate of certainty. For rs1493664, GRAIL could not assign a gene and we therefore selected *LUZP2* as the closest gene in the genome to represent this locus. Further information about the most likely gene for each region as determined by GRAIL is provided in **Supplementary Table 16**. The resulting 37 GRAIL genes were used as seed genes to obtain direct functional associations from the STRING database<sup>210</sup> including the evidence types ‘Experiments’ and ‘Databases’ (without text mining), resulting in an urate-locus centered network containing 845 genes directly connected to a seed gene or the seed gene itself. For 6 seed genes (*TMEM171*, *MUSTN1*, *C17orf82*, *STC1*, *SLC16A9*, *LUZP2*) we did not obtain any functional associations from the STRING database according to our selection criteria. Networks based on two and three edge connections were also investigated. Each of the newly derived genes in a one edge neighborhood (ie, directly connected) was annotated with the SNP showing the smallest p-value in a 110KB upstream to 40KB downstream window<sup>211</sup> in the urate discovery meta-analysis. Of the 845 genes annotated in the network, 31 were seed genes, 33 were not annotated with any SNP according to the KB window, 40 SNPs were annotated to two of the genes and 3 appeared three times, resulting in a total of 735 unique new SNPs for further examination. Accordingly, we applied a new Bonferroni-corrected significance level  $=0.05/735=6.80*10^{-5}$ ; a total of 27 different SNPs passed this cut-off. Of these, SNPs within 1 Mb or 2.5 Mb (*HLA* locus) of known regions were removed, leaving 19 SNPs, of which two pairs of SNPs were pruned due to high LD. As a result, 17 independent SNPs were subjected to validation testing among the *in silico* and *de novo* replication studies.

Second, we conducted an analysis using Ingenuity Pathway Analysis (IPA) software v9.0 (content version: 3210, release date: 2011-05-17), based on the 37 independent loci associated with serum urate at p-value  $<1*10^{-6}$ . IPA uses a comprehensive database containing various genes and gene products that interact with each other to select networks and functions enriched by the input genes. It tests a set of genes for enrichment in defined canonical pathways or functions and generates *de novo* networks of interacting genes or gene products. In the reference database, the Ingenuity Knowledge Base, all information regarding the interactions is maintained.

Details on the IPA methods and algorithms can be found in the IPA Network Generation Algorithm whitepaper (October 29, 2005). In the 37 independent genomic regions containing SNPs associated with serum urate at p-value  $<1*10^{-6}$ , 55 genes were selected as input with at least one SNP in the transcribed region that had an  $r^2>0.5$  with the lead SNP of the corresponding urate associated locus (*PKD2* has been manually removed of the *ABCG2* region due to its known non urate transport function). In IPA, endogenous chemicals were excluded from the search and only direct relationships with a high confidence (experimentally observed or highly predicted) were included. Data sources included in the analysis were Ingenuity Expert Informations (Ingenuity Expert Findings), Ingenuity Supported Third Party Informations (MircoRNA-mRNA interactions, miRecords, TarBase, TargetScan Human, Protein-protein interactions), BIND (BIOGRID, Cognia, DIP, INTACT, Interactome studies, MINT, MIPS), Additional Sources (ClinicalTrials.gov, Gene Ontology (GO), GVK Biosciences, Kyoto Encyclopedia of Genes and Genomes (KEGG), miRBase, Obesity Gene Map Database). Enriched (nominal p-value  $<1*10^{-3}$ ) pathways and networks are listed in **Supplementary Table 17**.

*The following secondary analyses (k. to m.) were conducted for 61 SNPs identified for replication testing from the GWAS discovery meta-analyses (37 SNPs from urate overall), GWAS secondary analyses (1 for men, 5 for women, 1 for urate transporters), and 17 SNPs identified in network analyses in order to better characterize the associations.*

### **Association with Serum Metabolite Concentrations**

The association between the index SNP at the 61 loci considered for replication and the serum concentrations of 276 metabolites and 37,179 metabolite ratios were queried in 1,768 individuals of the KORA F4 study as provided at the GWAS server (<http://metabolomics.helmholtz-muenchen.de/gwa/>). Metabolites were measured using Metabolon and quality control of the data was conducted as described previously<sup>126</sup>. For each of the SNPs, results with p-values  $<5*10^{-6}$  are reported in **Supplementary Table 7**.

### **Association with Other GWAS Results in the NHGRI Database**

By use of a GWAS server at <http://metabolomics.helmholtz-muenchen.de/gwa/>, all 61 SNPs as well as SNPs in LD ( $r^2>0.5$ ) were evaluated for their association with other traits according to the NHGRI GWAS catalog<sup>212</sup> as shown in **Supplementary Table 7**.

### **Regional Association Plots**

Regional Association Plots were generated using the stand-alone version of LocusZoom<sup>1</sup>. Information about LD was obtained from HapMap CEU r28. Regional Association Plots for 44 primary and secondary GWAS loci are shown in **Supplementary Figure 2**. P-values at sex-specific loci (*HLA-DRB5*, *DAB2*, *ANKRD55*, *FRK*, *HNFA1A*, *MC4R*) correspond to the sex-specific GWAS results. Regional Association Plots for the replicated network loci as shown in **Table 3** are shown in **Supplementary Figure 7**.

## De Novo Genotyping Information

Genotyping for KORA S2 and Ogliastra Genetic Park samples was performed at Helmholtz Zentrum München and genotyping of the HYPEST samples was performed at the University of Tartu with the MassARRAY system using the iPLEX technology (Sequenom, San Diego, CA). The allele-dependent primer extension products were loaded onto one 384-element chip using a nanoliter pipetting system (SpectroCHIP, Spectro-POINT Spotter, Sequenom at Helmholtz Zentrum München and MassARRAY Nanodispenser RS1000, Sequenom at the University of Tartu). The samples were analyzed by matrix-assisted laser desorption/ionization time-of-flight mass spectrometry (Bruker Daltonik, Leipzig, Germany at the Helmholtz Zentrum München and MassARRAY Analyzer 4, Sequenom at the University of Tartu). The resulting mass spectra were analyzed for peak identification via the SpectroTYPER RT 3.4 software from Sequenom (Helmholtz Zentrum München) and the TyperAnalyzer 4.0 software (University of Tartu).

The designed plex for Ogliastra Genetic Park samples contained 30 SNPs: rs1035942 (*INSR*), rs10813960 (*B4GALTI*), rs11954519 (*DAB2*), rs12955983 (*MC4R*), rs1394125 (*UBE2Q2*), rs1493664 (*LUZP2*), rs17050272 (*INHBB*), rs1933737 (*FRK*), rs2079742 (*BCAS3*), rs2185631 (*ABCC10*), rs2195525 (*USP2*), rs2244608 (*HNF1A*), rs3184504 (*ATXN2*, proxy for rs653178,  $r^2=0.873$ ), rs642803 (*OVO1*), rs10821905 (*AICF*), rs11757159 (*HLA-DRB5*), rs1178977 (*BAZ1B*), rs1458038 (*FGF5*, proxy for rs11099098,  $r^2=1$ ), rs157510 (*ANKRD55*, proxy for rs456867,  $r^2=1$ ), rs164009 (*QRICH2*), rs17632159 (*TMEM171*), rs17786744 (*STC1*), rs4149178 (*SLC22A7*), rs4777542 (*ADPGK*), rs584480 (*DACHI*), rs6729465 (*ORC4L*, proxy for rs2307394,  $r^2=1$ ), rs7188445 (*MAF*), rs7193778 (*NFAT5*), rs7224610 (*HLF*), and rs729761 (*VEGFA*). 27 of the selected 30 SNPs could be genotyped successfully. rs2185631 (*ABCC10*) could not be called properly whereas rs4777542 (*ADPGK*) and rs11757159 (*HLA-DRB5*) had to be removed due to HWE discrepancies. 9,556 individuals were genotyped with call rates above 0.9 and used for the replication analysis.

The designed plex for HYPEST and KORA S2 contained the following 30 SNPs: rs2941484 (*HNF4G*), rs642803 (*OVO1*), rs6729465 (*ORC4L*, proxy for rs2307394,  $r^2=1$ ), rs10480300 (*PRKAG2*), rs1035942 (*INSR*), rs10813960 (*B4GALTI*), rs11099098 (*FGF5*), rs7164727 (*ADPGK*, proxy for rs4777542,  $r^2=1$ ), rs1493664 (*LUZP2*), rs500830 (*DACHI*, proxy for rs584480,  $r^2=0.966$ ), rs2195525 (*USP2*), rs7953704 (*B3GNT4*), rs4970988 (*ARNT*), rs7976059 (*ACVR1B/ACVRL1*), rs4073745 (*SLC34A1*), rs11574736 (*HNF4A*), rs4760636 (*HDAC7*), rs2472297 (*CSK*), rs16824599 (*BMPR2*, proxy for rs12468226,  $r^2=1$ ), rs4972801 (*HOXD12*), rs12614722 (*ACVRL1*, proxy for rs6707470,  $r^2=1$ ), rs300913 (*GABI*, proxy for rs300915,  $r^2=1$ ), rs11056399 (*PTPRO*), rs884080 (*PRKCZ*), rs4984252 (*USP3*, proxy for rs3751043,  $r^2=1$ ), rs4963135 (*HRAS*, proxy for rs7944548,  $r^2=1$ ), rs10489401 (*PTGS2*), rs7141815 (*ESRRB*, proxy for rs11624421,  $r^2=1$ ), rs7732943 (*DAB2*, proxy for rs11954519,  $r^2=0.963$ ), and rs2244608 (*HNF1A*). In KORA S2, 25 of the selected 30 SNPs could be genotyped successfully. rs11056399 (*PTPRO*) and rs11099098 (*FGF5*) could not be called whereas rs500830 (*DACHI*), rs6729465 (*ORC4L*), and rs4972801 (*HOXD12*) were removed due to call rates below 0.9. 3,685 individuals were genotyped with call rates above 0.9 and used for the replication analysis. In

HYPEST 24 of the selected 30 SNPs could be genotyped successfully. rs11099098 (*FGF5*) could not be called and rs11056399 (*PTPRO*), rs2472297 (*CSK*), rs4963135 (*HRAS*), rs4972801 (*HOXD12*), and rs500830 (*DACHI*) were removed due to call rates below 0.9. The HYPEST study included 751 samples.

### **Supplementary Text 1: Replicated Urate GWAS Loci in the Inhibins-Activins Pathway**

Inhibins and activins are part of the transforming growth factor-beta (TGF- $\beta$ ) superfamily of growth and differentiation factors. They are dimers composed of alpha and/or beta subunits and signal through transmembrane receptors that are heteromeric complexes of type I and II serine threonine kinase subunits.

*INHBB* encodes for the inhibin beta subunit B that together with inhibin beta subunit A forms activin B, which has effects on gonadal function, reproduction and fetal development. A singularity of *INHBB* is its high mRNA expression in adipose tissues. Activin B has been proposed as a novel adipokine, a role likely dependent on signaling through the receptor I *ACVR1C*<sup>213</sup>, a suggestive urate-locus in our analysis (**Supplementary Table 7**). Data in mice knocked-out for *ACVR1C*, *INHBB* and double mutants suggest that activin B and *ACVR1C* both influence insulin secretion<sup>214</sup>, and *INHBB* transcript levels in human adipose tissues correlate with serum fasting insulin concentrations<sup>215</sup>. *INHBB* and *AVCR1C* proteins have been detected in the renal tubules as well. Their downstream signaling targets are currently unknown.

#### ***INHBC/INHBE:***

*INHBC* encodes for the inhibin beta subunit C, which was cloned from human liver<sup>216</sup>. Its function is still poorly characterized; it dimerizes with the beta A and B (encoded by *INHBB*) subunits *in vitro*.

*INHBE* encodes the fourth characterized human inhibin beta subunit, E, also cloned from human liver tissue<sup>217</sup>. Experiments in rats suggest that *INHBE* transcript levels in liver respond to feeding status<sup>218</sup>. The *INHBE* promoter contains binding elements for the C/EBP transcription factors involved in regulation of metabolic homeostasis<sup>219</sup>. In contrast to the broad expression pattern of *INHBA* and *INHBB*, *INHBE* is predominantly expressed in liver.

#### ***ACVR1B/ACVRL1:***

*ACVR1B* encodes for a type I receptor (ALK4) able to form a complex with *ACVR2A*, a suggestive urate-locus in our analysis (**Supplementary Table 7**). It transduces signals of a broader spectrum of ligands than the suggestive urate-locus *ACVR1C* but phosphorylates the same downstream effectors, Smad 2 and 3, part of the “TGF $\beta$ /activin” pathway. *RREB1*, a transcription factor also identified as a replicated urate-locus, has been reported to bind to the RAS-responsive elements of the *ACVR1B* gene promoter.

*ACVRL1* also encodes for a type I receptor, ALK1, able to form a complex with *ACVR2A*. It induces the phosphorylation of a different set of downstream effectors than *ACVR1B* and part of the “BMP pathway” kinases. Mutations in this gene have been reported as a cause of hemorrhagic telangiectasia type 2 (MIM:600376).

## **Supplementary Text 2: Replicated Genes Regulating Glucose Metabolism**

Genetic variants acting directly or indirectly on glycolysis could modulate urate levels in at least two ways: by altering the amount of lactate or other organic anions, which can affect urate transport, and by tuning *de novo* purine synthesis via the pentose phosphate pathway (PPP). Both processes have been well documented to account for the hyperuricemia co-occurring with gross alteration of glycolytic flux in type I glycogen storage disease (MIM #232200)<sup>220</sup>.

*GCKR*: in hepatocytes, the product of *GCKR* inhibits glucokinase that catalyzes the first reaction of glycogen synthesis and glycolysis<sup>221</sup>. Common *GCKR* variants have been associated with a variety of medically-relevant traits. Fructose, a recognized dietary enhancer of urate levels, and phosphorylation by AMP-activated kinase (AMPK), a subunit of which is among the newly identified urate genes (*PRKAG2*), modulate *GCKR*-mediated glucokinase inhibition<sup>222</sup>.

*PKLR* encodes the liver and erythrocyte enzyme that catalyzes the last, rate-limiting, step of glycolysis, generating ATP and pyruvate. Pyruvate is - under normoxia - mostly converted to acetyl-coenzymeA, but can also be converted to lactate which is known to lower urinary urate secretion<sup>223</sup>. In rats, *MLXIPL*, also identified here, is part of a complex recruited to the promoter of the *PKLR* homolog that mediates its glucose-induced expression and cAMP-induced repression<sup>224</sup>.

*MLXIPL* encodes a glucose-responsive transcription factor, ChREBP, which upon binding to carbohydrate response elements regulates the transcription of genes involved in glycolysis (e.g. *PKLR*) and lipogenesis in hepatocytes, pancreatic beta-cells and adipocytes. It acts as a repressor of the *ARNT* gene, a suggestive urate-associated locus (**Supplementary Table 7**), in pancreatic beta cells<sup>225</sup>, and activates the transcription of *INHBE*, a novel urate locus (**Supplementary Text 1**), under high glucose conditions<sup>226</sup>.

*PRKAG2* encodes the regulatory subunit gamma2 of the AMP-activated protein kinase (AMPK) complex, the key sensor of cellular AMP:ATP ratio that promotes glucose uptake and ATP-generating catabolic processes (e.g. glycolysis and pyruvate oxidation). AMPK is activated by the antidiabetic-drug metformin. The transcription factors encoded by *HNF4A* and *MLXIPL* as well as *GCKR*, are potential direct targets of AMPK<sup>222,227</sup>. Over-expression of the gamma 2 subunit in mice and inappropriate activation of AMPK under the non-energy deficient state by mutations in *PRKAG2* in humans lead to increase glycogen storage in the heart<sup>228</sup>. AMPK has also been implicated in the regulation of renal uric acid excretion in birds<sup>229</sup>.

*NFAT5* encodes a transcription factor activated by osmotic stress. Under hyperglycemic conditions it upregulates aldose reductase, which activates the polyol pathway modifying glucose flux and increasing PPP activity<sup>230</sup>. The association with FEUA could be connected to altered ion transport regulation by the accumulation of organic osmolytes.

*HNF4G*: like its better functionally characterized structural homolog HNF4A, it encodes a member of the nuclear receptor superfamily of transcription factors of the nutrient uptake sensors subclass, predominantly expressed in gastro-/enterohepatic tissues<sup>231</sup>. A study of inter-transcription factor regulatory network in human hepatoma cells<sup>232</sup> places HNF4G as a receiver of multiple transcription factors regulatory signals (including HNF4A).

## Consortium Memberships

### The CARDioGRAM Consortium

**Executive Committee:** Sekar Kathiresan<sup>1,2,3</sup>, Muredach P. Reilly<sup>4</sup>, Nilesh J. Samani<sup>5,6</sup>, Heribert Schunkert<sup>7</sup>, **Executive Secretary:** Jeanette Erdmann<sup>7</sup>, **Steering Committee:** Themistocles L. Assimes<sup>8</sup>, Eric Boerwinkle<sup>9</sup>, Jeanette Erdmann<sup>7</sup>, Alistair Hall<sup>10</sup>, Christian Hengstenberg<sup>11</sup>, Sekar Kathiresan<sup>1,2,3</sup>, Inke R. König<sup>12</sup>, Reijo Laaksonen<sup>13</sup>, Ruth McPherson<sup>14</sup>, Muredach P. Reilly<sup>4</sup>, Nilesh J. Samani<sup>5,6</sup>, Heribert Schunkert<sup>7</sup>, John R. Thompson<sup>15</sup>, Unnur Thorsteinsdottir<sup>16,17</sup>, Andreas Ziegler<sup>12</sup>, **Statisticians:** Inke R. König<sup>12</sup> (chair), John R. Thompson<sup>15</sup> (chair), Devin Absher<sup>18</sup>, Li Chen<sup>19</sup>, L. Adrienne Cupples<sup>20,21</sup>, Eran Halperin<sup>22</sup>, Mingyao Li<sup>23</sup>, Kiran Musununi<sup>1,2,3</sup>, Michael Preuss<sup>12,7</sup>, Arne Schillert<sup>12</sup>, Gudmar Thorleifsson<sup>16</sup>, Benjamin F. Voight<sup>2,3,24</sup>, George A. Wells<sup>25</sup>, **Writing group:** Themistocles L. Assimes<sup>8</sup>, Panos Deloukas<sup>26</sup>, Jeanette Erdmann<sup>7</sup>, Hilma Holm<sup>16</sup>, Sekar Kathiresan<sup>1,2,3</sup>, Inke R. König<sup>12</sup>, Ruth McPherson<sup>14</sup>, Muredach P. Reilly<sup>4</sup>, Robert Roberts<sup>14</sup>, Nilesh J. Samani<sup>5,6</sup>, Heribert Schunkert<sup>7</sup>, Alexandre F. R. Stewart<sup>14</sup>, **ADVANCE:** Devin Absher<sup>18</sup>, Themistocles L. Assimes<sup>8</sup>, Stephen Fortmann<sup>8</sup>, Alan Go<sup>27</sup>, Mark Hlatky<sup>8</sup>, Carlos Iribarren<sup>27</sup>, Joshua Knowles<sup>8</sup>, Richard Myers<sup>18</sup>, Thomas Quertermous<sup>8</sup>, Steven Sidney<sup>27</sup>, Neil Risch<sup>28</sup>, Hua Tang<sup>29</sup>, **CADomics:** Stefan Blankenberg<sup>30</sup>, Tanja Zeller<sup>30</sup>, Arne Schillert<sup>12</sup>, Philipp Wild<sup>30</sup>, Andreas Ziegler<sup>12</sup>, Renate Schnabel<sup>30</sup>, Christoph Sinning<sup>30</sup>, Karl Lackner<sup>31</sup>, Laurence Tiret<sup>32</sup>, Viviane Nicaud<sup>32</sup>, Francois Cambien<sup>32</sup>, Christoph Bickel<sup>30</sup>, Hans J. Rupprecht<sup>30</sup>, Claire Perret<sup>32</sup>, Carole Proust<sup>32</sup>, Thomas Münzel<sup>30</sup>, **CHARGE:** Maja Barbalic<sup>33</sup>, Joshua Bis<sup>34</sup>, Eric Boerwinkle<sup>9</sup>, Ida Yii-Der Chen<sup>35</sup>, L. Adrienne Cupples<sup>20,21</sup>, Abbas Dehghan<sup>36</sup>, Serkalem Demissie-Banjaw<sup>37,21</sup>, Aaron Folsom<sup>38</sup>, Nicole Glazer<sup>39</sup>, Vilundur Gudnason<sup>40,41</sup>, Tamara Harris<sup>42</sup>, Susan Heckbert<sup>43</sup>, Daniel Levy<sup>21</sup>, Thomas Lumley<sup>44</sup>, Kristin Marcic<sup>45</sup>, Alanna Morrison<sup>46</sup>, Christopher J. O'Donnell<sup>47</sup>, Bruce M. Psaty<sup>48</sup>, Kenneth Rice<sup>49</sup>, Jerome I. Rotter<sup>35</sup>, David S. Siscovick<sup>50</sup>, Nicholas Smith<sup>43</sup>, Albert Smith<sup>40,41</sup>, Kent D. Taylor<sup>35</sup>, Cornelia van Duijn<sup>36</sup>, Kelly Volcik<sup>46</sup>, Jaqueline Whitteman<sup>36</sup>, Vasana Ramachandran<sup>51</sup>, Albert Hofman<sup>36</sup>, Andre Uitterlinden<sup>52,36</sup>, **deCODE:** Solveig Gretarsdottir<sup>16</sup>, Jeffrey R. Gulcher<sup>16</sup>, Hilma Holm<sup>16</sup>, Augustine Kong<sup>16</sup>, Kari Stefansson<sup>16,17</sup>, Gudmundur Thorgeirsson<sup>53,17</sup>, Karl Andersen<sup>53,17</sup>, Gudmar Thorleifsson<sup>16</sup>, Unnur Thorsteinsdottir<sup>16,17</sup>, **GERMIFS I and II:** Jeanette Erdmann<sup>7</sup>, Marcus Fischer<sup>11</sup>, Anika Grosshennig<sup>12,7</sup>, Christian Hengstenberg<sup>11</sup>, Inke R. König<sup>12</sup>, Wolfgang Lieb<sup>54</sup>, Patrick Linsel-Nitschke<sup>7</sup>, Michael Preuss<sup>12,7</sup>, Klaus Stark<sup>11</sup>, Stefan Schreiber<sup>55</sup>, H.-Erich Wichmann<sup>56,58,59</sup>, Andreas Ziegler<sup>12</sup>, Heribert Schunkert<sup>7</sup>, **GERMIFS III (KORA):** Zouhair Aherrahrou<sup>7</sup>, Petra Bruse<sup>7</sup>, Angela Doering<sup>56</sup>, Jeanette Erdmann<sup>7</sup>, Christian Hengstenberg<sup>11</sup>, Thomas Illig<sup>56</sup>, Norman Klopp<sup>56</sup>, Inke R. König<sup>12</sup>, Patrick Linsel-Nitschke<sup>7</sup>, Christina Loley<sup>12,7</sup>, Anja Medack<sup>7</sup>, Christina Meisinger<sup>56</sup>, Thomas Meitinger<sup>57,60</sup>, Janja Nahrstedt<sup>12,7</sup>, Annette Peters<sup>56</sup>, Michael Preuss<sup>12,7</sup>, Klaus Stark<sup>11</sup>, Anika K. Wagner<sup>7</sup>, H.-Erich Wichmann<sup>56,58,59</sup>, Christina Willenborg<sup>12,7</sup>, Andreas Ziegler<sup>12</sup>, Heribert Schunkert<sup>7</sup>, **LURIC/AtheroRemo:** Bernhard O. Böhm<sup>61</sup>, Harald Dobnig<sup>62</sup>, Tanja B. Grammer<sup>63</sup>, Eran Halperin<sup>22</sup>, Michael M. Hoffmann<sup>64</sup>, Marcus Kleber<sup>65</sup>, Reijo Laaksonen<sup>13</sup>, Winfried März<sup>63,66,67</sup>, Andreas Meinitzer<sup>66</sup>, Bernhard R. Winkelmann<sup>68</sup>, Stefan Pilz<sup>62</sup>, Wilfried Renner<sup>66</sup>, Hubert Scharnagl<sup>66</sup>, Tatjana Stojakovic<sup>66</sup>, Andreas Tomaschitz<sup>62</sup>, Karl Winkler<sup>64</sup>, **MIGen:** Benjamin F.

Voight<sup>2,3,24</sup>, Kiran Musunuru<sup>1,2,3</sup>, Candace Guiducci<sup>3</sup>, Noel Burt<sup>3</sup>, Stacey B. Gabriel<sup>3</sup>, David S. Siscovick<sup>50</sup>, Christopher J. O'Donnell<sup>47</sup>, Roberto Elosua<sup>69</sup>, Leena Peltonen<sup>49</sup>, Veikko Salomaa<sup>70</sup>, Stephen M. Schwartz<sup>50</sup>, Olle Melander<sup>26</sup>, David Altshuler<sup>71,3</sup>, Sekar Kathiresan<sup>1,2,3</sup>, OHGS: Alexandre F. R. Stewart<sup>14</sup>, Li Chen<sup>19</sup>, Sonny Dandona<sup>14</sup>, George A. Wells<sup>25</sup>, Olga Jarinova<sup>14</sup>, Ruth McPherson<sup>14</sup>, Robert Roberts<sup>14</sup>, PennCATH/MedStar: Muredach P. Reilly<sup>4</sup>, Mingyao Li<sup>23</sup>, Liming Qu<sup>23</sup>, Robert Wilensky<sup>4</sup>, William Matthai<sup>4</sup>, Hakon H. Hakonarson<sup>72</sup>, Joe Devaney<sup>73</sup>, Mary Susan Burnett<sup>73</sup>, Augusto D. Pichard<sup>73</sup>, Kenneth M. Kent<sup>73</sup>, Lowell Satler<sup>73</sup>, Joseph M. Lindsay<sup>73</sup>, Ron Waksman<sup>73</sup>, Christopher W. Knouff<sup>74</sup>, Dawn M. Waterworth<sup>74</sup>, Max C. Walker<sup>74</sup>, Vincent Mooser<sup>74</sup>, Stephen E. Epstein<sup>73</sup>, Daniel J. Rader<sup>75,4</sup>, WTCCC: Nilesh J. Samani<sup>5,6</sup>, John R. Thompson<sup>15</sup>, Peter S. Braund<sup>5</sup>, Christopher P. Nelson<sup>5</sup>, Benjamin J. Wright<sup>76</sup>, Anthony J. Balmforth<sup>77</sup>, Stephen G. Ball<sup>78</sup>, Alistair S. Hall<sup>10</sup>, Wellcome Trust Case Control Consortium.

1 Cardiovascular Research Center and Cardiology Division, Massachusetts General Hospital, Boston, MA, USA; 2 Center for Human Genetic Research, Massachusetts General Hospital, Boston, MA, USA; 3 Program in Medical and Population Genetics, Broad Institute of Harvard and Massachusetts Institute of Technology (MIT), Cambridge, MA, USA; 4 The Cardiovascular Institute, University of Pennsylvania, Philadelphia, PA, USA; 5 Department of Cardiovascular Sciences, University of Leicester, Glenfield Hospital, Leicester, UK; 6 Leicester National Institute for Health Research Biomedical Research Unit in Cardiovascular Disease, Glenfield Hospital, Leicester, LE3 9QP, UK; 7 Medizinische Klinik II, Universität zu Lübeck, Lübeck, Germany; 8 Department of Medicine, Stanford University School of Medicine, Stanford, CA, USA; 9 University of Texas Health Science Center, Human Genetics Center and Institute of Molecular Medicine, Houston, TX, USA; 10 Division of Cardiovascular and Neuronal Remodelling, Multi-disciplinary Cardiovascular Research Centre, Leeds Institute of Genetics, Health and Therapeutics, University of Leeds, UK; 11 Klinik und Poliklinik für Innere Medizin II, Universität Regensburg, Regensburg, Germany; 12 Institut für Medizinische Biometrie und Statistik, Universität zu Lübeck, Lübeck, Germany; 13 Science Center, Tampere University Hospital, Tampere, Finland; 14 The John & Jennifer Ruddy Canadian Cardiovascular Genetics Centre, University of Ottawa Heart Institute, Ottawa, Canada; 15 Department of Health Sciences, University of Leicester, Leicester, UK; 16 deCODE Genetics, 101 Reykjavik, Iceland; 17 University of Iceland, Faculty of Medicine, 101 Reykjavik, Iceland; 18 Hudson Alpha Institute, Huntsville, Alabama, USA; 19 Cardiovascular Research Methods Centre, University of Ottawa Heart Institute, 40 Ruskin Street, Ottawa, Ontario, Canada, K1Y 4W7; 20 Department of Biostatistics, Boston University School of Public Health, Boston, MA USA; 21 National Heart, Lung and Blood Institute's Framingham Heart Study, Framingham, MA, USA; 22 The Blavatnik School of Computer Science and the Department of Molecular Microbiology and Biotechnology, Tel-Aviv University, Tel-Aviv, Israel, and the International Computer Science Institute, Berkeley, CA, USA; 23 Biostatistics and Epidemiology, University of Pennsylvania, Philadelphia, PA, USA; 24 Department of Medicine, Harvard Medical School, Boston, MA, USA; 25 Research Methods, Univ Ottawa Heart Inst; 26 Department of Clinical Sciences, Hypertension and Cardiovascular Diseases, Scania University Hospital, Lund University, Malmö, Sweden; 27 Division of Research, Kaiser Permanente, Oakland, CA, USA; 28 Institute for Human Genetics, University of California, San Francisco, San Francisco, CA, USA; 29 Dept Cardiovascular Medicine, Cleveland Clinic; 30 Medizinische Klinik und Poliklinik, Johannes-Gutenberg Universität Mainz, Universitätsmedizin, Mainz, Germany; 31 Institut für Klinische Chemie und Laboratoriumsmedizin, Johannes-Gutenberg Universität Mainz, Universitätsmedizin, Mainz, Germany; 32 INSERM UMR5 937, Pierre and Marie Curie University (UPMC, Paris 6) and Medical School, Paris, France; 33 University of Texas Health Science Center, Human Genetics Center, Houston, TX, USA; 34 Cardiovascular Health Research Unit and Department of Medicine, University of Washington, Seattle, WA USA; 35 Cedars-Sinai Medical Center, Medical Genetics Institute, Los Angeles, CA, USA; 36 Erasmus Medical Center, Department of Epidemiology, Rotterdam, The Netherlands; 37 Boston University, School of Public Health, Boston, MA, USA; 38 University of Minnesota School of Public Health, Division of Epidemiology and Community Health, School of Public Health (A.R.F.), Minneapolis, MN, USA; 39 University of Washington, Cardiovascular Health Research Unit and Department of Medicine, Seattle, WA, USA; 40 Icelandic Heart Association, Kopavogur Iceland; 41 University of Iceland, Reykjavik, Iceland; 42 Laboratory of Epidemiology, Demography, and Biometry, Intramural Research Program, National Institute on Aging, National Institutes of Health, Bethesda MD, USA; 43 University of Washington, Department of Epidemiology, Seattle, WA, USA; 44 University of Washington, Department of Biostatistics, Seattle, WA, USA; 45 University of Washington, Department of Internal Medicine, Seattle, WA, USA; 46 University of Texas, School of Public Health, Houston, TX, USA; 47 National Heart, Lung and Blood Institute, Framingham Heart Study, Framingham, MA and Cardiology Division, Massachusetts General Hospital, Boston, MA, USA; 48 Center for Health Studies, Group Health, Departments of Medicine, Epidemiology, and Health Services, Seattle, WA, USA; 49 The Wellcome Trust Sanger Institute, The Wellcome Trust Genome Campus, Hinxton, Cambridge, UK; 50 Cardiovascular Health Research Unit, Departments of Medicine and Epidemiology, University of Washington, Seattle; 51 Boston University Medical Center, Boston, MA, USA; 52 Department of Internal Medicine, Erasmus Medical Center, Rotterdam, The Netherlands; 53 Department of Medicine, Landspítali University Hospital, 101 Reykjavik, Iceland; 54 Boston University School of Medicine, Framingham Heart Study, Framingham, MA, USA; 55 Institut für Klinische Molekularbiologie, Christian-Albrechts Universität, Kiel, Germany; 56 Institute of Epidemiology, Helmholtz Zentrum München – German Research Center for Environmental Health, Neuherberg, Germany; 57 Institut für Humangenetik, Helmholtz Zentrum München, Deutsches Forschungszentrum für Umwelt und Gesundheit, Neuherberg, Germany; 58 Institute of Medical Information Science, Biometry and Epidemiology, Ludwig-Maximilians-Universität München, Germany; 59 Klinikum Grosshadern, Munich, Germany; 60 Institut für Humangenetik, Technische Universität München, Germany; 61 Division of Endocrinology and Diabetes, Graduate School of Molecular Endocrinology and Diabetes, University of Ulm, Ulm, Germany; 62 Division of Endocrinology, Department of Medicine, Medical University of Graz, Austria; 63 Synlab Center of Laboratory Diagnostics Heidelberg, Heidelberg, Germany; 64



Division of Clinical Chemistry, Department of Medicine, Albert Ludwigs University, Freiburg, Germany, 65 LURIC non profit LLC, Freiburg, Germany; 66 Clinical Institute of Medical and Chemical Laboratory Diagnostics, Medical University Graz, Austria; 67 Institute of Public Health, Social and Preventive Medicine, Medical Faculty Mannheim, University of Heidelberg, Germany; 68 Cardiology Group Frankfurt-Sachsenhausen, Frankfurt, Germany; 69 Cardiovascular Epidemiology and Genetics Group, Institut Municipal d'Investigació Mèdica, Barcelona; Ciber Epidemiología y Salud Pública (CIBERSP), Spain; 70 Chronic Disease Epidemiology and Prevention Unit, Department of Chronic Disease Prevention, National Institute for Health and Welfare, Helsinki, Finland; 71 Department of Molecular Biology and Center for Human Genetic Research, Massachusetts General Hospital, Harvard Medical School, Boston, USA; 72 The Center for Applied Genomics, Children's Hospital of Philadelphia, Philadelphia, Pennsylvania, USA; 73 Cardiovascular Research Institute, Medstar Health Research Institute, Washington Hospital Center, Washington, DC 20010, USA; 74 Genetics Division and Drug Discovery, GlaxoSmithKline, King of Prussia, Pennsylvania 19406, USA; 75 The Institute for Translational Medicine and Therapeutics, School of Medicine, University of Pennsylvania, Philadelphia, PA, USA; 76 Department of Cardiovascular Surgery, University of Leicester, Leicester, UK; 77 Division of Cardiovascular and Diabetes Research, Multi-disciplinary Cardiovascular Research Centre, Leeds Institute of Genetics, Health and Therapeutics, University of Leeds, Leeds, LS2 9JT, UK; 78 LIGHT Research Institute, Faculty of Medicine and Health, University of Leeds, Leeds, UK.

### **The ICBP Consortium**

Gonçalo R. Abecasis, Linda S. Adair, Adebowale Adeyemo, Mika Ala-Korpela, Myriam Alexander, David Altshuler, Najaf Amin, Dan E. Arking, Pankaj Arora, Thor Aspelund, Yurii Aulchenko, Stephan J.L. Bakker, Stefania Bandinelli, Inês Barroso, Jacques S. Beckmann, John P. Beilby, Richard N. Bergman, Sven Bergmann, Joshua C. Bis, Murielle Bochud, Michael Boehnke, Eric Boerwinkle, Lori L. Bonnycastle, Stefan R. Bornstein, Michiel L. Bots, Jennifer L Bragg-Gresham, Eva Brand, Stefan-Martin Brand, Peter S. Braund, Morris J. Brown, Paul R. Burton, Harry Campbell, Juan P. Casas, Mark J. Caulfield, Aravinda Chakravarti, John C. Chambers, Giriraj R. Chandak, Yen-Pei C. Chang, Fadi J. Charchar, Daniel I. Chasman, Nish Chaturvedi, Ming-Huei Chen, Yoon Shin Cho, Robert Clarke, Francis S. Collins, Rory Collins, John M. Connell, Jackie A. Cooper, Matthew N. Cooper, Richard S. Cooper, Josef Coresh, Anna Maria Corsi, Santosh Dahgam, John Danesh, Ian N.M. Day, Abbas Dehghan, Panos Deloukas, Ayse Demirkan, Matthew Denniff, Anna F. Dominiczak, Yanbin Dong, Marcus Dörr, Ayo Doumatey, Albert W. Dreisbach, Georg B. Ehret, Paul Elliott, Roberto Elosua, Valur Emilsson, Jeanette Erdmann, Susana Eyheramendy, Martin Farrall, Cristiano Fava, Luigi Ferrucci, Terrence Forrester, F. Gerald R. Fowkes, Ervin R. Fox, Timothy M. Frayling, Pilar Galan, Santhi K. Ganesh, Melissa Garcia, Tom R. Gaunt, Christian Gieger, Nicole L. Glazer, Min Jin Go, Anuj Goel, Jürgen Grässler, Diederick E. Grobbee, Leif Groop, Simonetta Guarrera, Vilmundur Gudnason, Xiuqing Guo, Ulf B. Gyllenstein, David Hadley, Anders Hamsten, Bok-Ghee Han, Rebecca Hardy, Tamara B. Harris, Anna-Liisa Hartikainen, Caroline Hayward, Simon Heath, Susan R Heckbert, Bo Hedblad, Serge Hercberg, Dena Hernandez, Andrew A. Hicks, Gina Hilton, Aroon D. Hingorani, Judith A. Hoffman Bolton, Albert Hofman, Jemma C Hopewell, Philip Howard, Steve E. Humphries, Steven C. Hunt, Kristian Hveem, Shih-Jen Hwang, Wilmar Igl, M. Arfan Ikram, Aaron Isaacs, Muhammad Islam, Naoharu Iwai, Anne U. Jackson, Tazeen H. Jafar, Charles S. Janipalli, Marjo-Riitta Jarvelin, Andrew D. Johnson, Toby Johnson, Mika Kähönen, Antti J Kangas, Wen Hong Linda Kao, Sharon L. Kardina, Sekar Kathiresan, Johannes Kettunen, Kay-Tee Khaw, Hyung-Lae Kim, Sanjay Kinra, Yoshikuni Kita, Mika Kivimaki, Jaspal S. Kooner, Anna Köttgen, M. J. Kranthi Kumar, Heyo K. Kroemer, Diana Kuh, Smita R. Kulkarni, Meena Kumari, Johanna Kuusisto, Tatiana Kuznetsova, Markku Laakso, Maris Laan, Jaana Laitinen, Edward G Lakatta, Carl D. Langefeld, Martin G. Larson, Mark Lathrop, Lenore Launer, Debbie A. Lawlor, Robert W. Lawrence, Jong-Young Lee, Nanette R. Lee, Terho Lehtimäki, Daniel Levy, Yali Li, Yongmei Liu, Kurt K. Lohman, W. T. Longstreth Jr., Ruth J.F.

Loos, Jian'an Luan, Gavin Lucas, Barbara Ludwig, Leo-Pekka Lyytikäinen, Massimo Mangino, K. Radha Mani, Michael G. Marmot, Francesco U.S. Mattace-Raso, Giuseppe Matullo, Wendy L. McArdle, Colin A. McKenzie, Thomas Meitinger, Olle Melander, Pierre Meneton, James F. Meschia, Tetsuro Miki, Yuri Milaneschi, Karen L. Mohlke, Vincent Mooser, Mario A. Morken, Richard W. Morris, Alanna C. Morrison, Thomas H. Mosley, Patricia B. Munroe, Samer Najjar, Michael A. Nalls, Narisu Narisu, Geerjan Navis, Christopher Newton-Cheh, Khanh-Dung Hoang Nguyen, Peter Nilsson, Fredrik Nyberg, Jeffrey R. O'Connell, Chris O'Donnell, Paul F. O'Reilly, Toshio Ogihara, Takayoshi Ohkubo, Tomonori Okamura, Matthias Olden, Rick Twee-Hee Ong, Halit Ongen, N. Charlotte Onland-Moret, Ben A. Oostra, Elin Org, Marco Orru, Walter Palmas, Jutta Palmén, Lyle J. Palmer, Nicholette D. Palmer, Alex N. Parker, Afshin Parsa, Cristian Pattaro, John F Peden, Leena Peltonen, Markus Perola, Vasyi Pihur, Carl G.P. Platou, Andrew Plump, Ozren Polasek, Dorairajan Prabhakaran, Peter P. Pramstaller, Inga Prokopenko, Bruce M. Psaty, Leslie J. Raffel, Olli Raitakari, Dabeeru C. Rao, Asif Rasheed, Rainer Rettig, Fulvio Ricceri, Kenneth M. Rice, Paul M Ridker, Fernando Rivadeneira, Annika Rosengren, Charles Rotimi, Jerome I. Rotter, Igor Rudan, Megan E. Rudock, Tunde Salako, Danish Saleheen, Veikko Salomaa, Nilesh J. Samani, Stephen M. Schwartz, Peter E.H. Schwarz, James Scott, Laura J. Scott, Angelo Scuteri, Joban S. Sehmi, Mark Seielstad, Sudha Seshadri, Pankaj Sharma, Sue Shaw-Hawkins, Gang Shi, Nick R.G. Shrine, Daniel Shriner, Alan R. Shuldiner, Eric J.G. Sijbrands, Xueling Sim, Andrew Singleton, Marketa Sjögren, Albert V. Smith, George Davey Smith, Nicholas L Smith, Harold Snieder, Siim Söber, Pasi Soiminen, Maria Soler Artigas, Nicole Soranzo, Tim D. Spector, Jan A. Staessen, Alena Stan\_áková, Nanette I. Steinle, David P. Strachan, Heather M. Stringham, Yan V. Sun, Amy J. Swift, Yasuharu Tabara, E Shyong Tai, Philippa J. Talmud, Toshiko Tanaka, Andrew Taylor, Bamidele Tayo, Janos Terzic, Alexander Teumer, Dag S. Thelle, Martin D. Tobin, Maciej Tomaszewski, Vikal Tripathy, Taru Tukiainen, Jaakko Tuomilehto, Ioanna Tzoulaki, Manuela Uda, Hirotsugu Ueshima, Cuno S.P.M. Uiterwaal, Andre G. Uitterlinden, Satoshi Umemura, Pim van der Harst, Yvonne T. van der Schouw, Cornelia M. van Duijn, Wiek H. van Gilst, Erkki Vartiainen, Ramachandran S. Vasani, Gudrun Veldre, Germaine C. Verwoert, Margus Viigimaa, Jorma Viikari, D. G. Vinay, Paolo Vineis, Veronique Vitart, Benjamin F. Voight, Uwe Völker, Peter Vollenweider, Henry Völzke, Lynne E. Wagenknecht, Louise V. Wain, Thomas J. Wang, Xiaoling Wang, Nicholas J. Wareham, Hugh Watkins, Alan B. Weder, Peter H. Whincup, H.-Erich Wichmann, Kerri L Wiggins, Sarah H. Wild, James F. Wilson, Jacqueline C.M. Witteman, Andrew Wong, Tien Y. Wong, Alan F. Wright, Ying Wu, Peter Würtz, Chittaranjan S. Yajnik, Jie Yao, J H. Young, Diana Zelenika, Guangju Zhai, Feng Zhang, Weihua Zhang, Jing Hua Zhao, Haidong Zhu, Xiaofeng Zhu, Paavo Zitting, Ewa Zukowska-Szzechowska

### **The MAGIC Consortium**

#### **Fasting insulin, fasting glucose, HOMA-B, HOMA-IR**

Josée Dupuis<sup>1,2,178</sup>, Claudia Langenberg<sup>3,178</sup>, Inga Prokopenko<sup>4,5,178</sup>, Richa Saxena<sup>6,7,178</sup>, Nicole Soranzo<sup>8,9,178</sup>, Anne U Jackson<sup>10</sup>, Eleanor Wheeler<sup>11</sup>, Nicole LGlazer<sup>12</sup>, Nabila Bouatia-Naji<sup>13</sup>, Anna LGloyn<sup>4</sup>, Cecilia MLindgren<sup>4,5</sup>, Reedik Mägi<sup>4,5</sup>, Andrew P Morris<sup>5</sup>, Joshua Randall<sup>5</sup>, Toby

Johnson<sup>14-16</sup>, Paul Elliott<sup>17,176</sup>, Denis Rybin<sup>18</sup>, Gudmar Thorleifsson<sup>19</sup>, Valgerdur Steinthorsdottir<sup>19</sup>, Peter Henneman<sup>20</sup>, Harald Grallert<sup>21</sup>, Abbas Dehghan<sup>22</sup>, Jouke Jan Hottenga<sup>23</sup>, Christopher SFranklin<sup>24</sup>, Pau Navarro<sup>25</sup>, Kijoung Song<sup>26</sup>, Anuj Goel<sup>5,27</sup>, John R B Perry<sup>28</sup>, Josephine MEgan<sup>29</sup>, Taina Lajunen<sup>30</sup>, Niels Grarup<sup>31</sup>, Thomas Sparso<sup>31</sup>, Alex Doney<sup>32</sup>, Benjamin F Voight<sup>6,7</sup>, Heather MStringham<sup>10</sup>, Man Li<sup>33</sup>, Stavroula Kanoni<sup>34</sup>, Peter Shrader<sup>35</sup>, Christine Cavalcanti-Proença<sup>13</sup>, Meena Kumari<sup>36</sup>, Lu Qi<sup>37</sup>, Nicholas J Timpson<sup>38</sup>, Christian Gieger<sup>21</sup>, Carina Zabena<sup>39</sup>, Ghislain Rocheleau<sup>40,41</sup>, Erik Ingelsson<sup>42,43</sup>, Ping An<sup>44</sup>, Jeffrey O'Connell<sup>45</sup>, Jian'an Luan<sup>3</sup>, Amanda Elliott<sup>6,7</sup>, Steven A McCarroll<sup>6,7</sup>, Felicity Payne<sup>11</sup>, Rosa Maria Roccasecca<sup>11</sup>, François Pattou<sup>46</sup>, Praveen Sethupathy<sup>47</sup>, Kristin Ardlie<sup>48</sup>, Yavuz Ariyurek<sup>49</sup>, Beverley Balkau<sup>50</sup>, Philip Barter<sup>51</sup>, John P Beilby<sup>52,53</sup>, Yoav Ben-Shlomo<sup>54</sup>, Rafn Benediktsson<sup>55,56</sup>, Amanda J Bennett<sup>4</sup>, Sven Bergmann<sup>14,16</sup>, Muielle Bochud<sup>15</sup>, Eric Boerwinkle<sup>57</sup>, Amélie Bonnefond<sup>13</sup>, Lori LBonnycastle<sup>47</sup>, Knut Borch-Johnsen<sup>58,59</sup>, Yvonne Böttcher<sup>60</sup>, Eric Brunner<sup>36</sup>, Suzannah J Bumpstead<sup>8</sup>, Guillaume Charpentier<sup>61</sup>, Yii-Der Ida Chen<sup>62</sup>, Peter Chines<sup>47</sup>, Robert Clarke<sup>63</sup>, Lachlan J MCoin<sup>17</sup>, Matthew NCooper<sup>64</sup>, Marilyn Cornelis<sup>37</sup>, Gabe Crawford<sup>6</sup>, Laura Crisponi<sup>65</sup>, Ian NMDay<sup>38</sup>, Eco J Cde Geus<sup>23</sup>, Jerome Delplanque<sup>13</sup>, Christian Dina<sup>13</sup>, Michael R Erdos<sup>47</sup>, Annette CFedson<sup>64,66</sup>, Antje Fischer-Rosinsky<sup>67,68</sup>, Nita GForouhi<sup>3</sup>, Caroline SFox<sup>2,69</sup>, Rune Frants<sup>70</sup>, Maria Grazia Franzosi<sup>71</sup>, Pilar Galan<sup>72</sup>, Mark OGoodarzi<sup>62</sup>, Jürgen Graessler<sup>73</sup>, Christopher J Groves<sup>4</sup>, Scott Grundy<sup>74</sup>, Rhian Gwilliam<sup>8</sup>, Ulf Gyllensten<sup>75</sup>, Samy Hadjadj<sup>76</sup>, Göran Hallmans<sup>77</sup>, Naomi Hammond<sup>8</sup>, Xijing Han<sup>10</sup>, Anna-Liisa Hartikainen<sup>78</sup>, Neelam Hassanali<sup>4</sup>, Caroline Hayward<sup>25</sup>, Simon CHeath<sup>79</sup>, Serge Hercberg<sup>80</sup>, Christian Herder<sup>81</sup>, Andrew A Hicks<sup>82</sup>, David R Hillman<sup>66,83</sup>, Aroon DHingorani<sup>36</sup>, Albert Hofman<sup>22</sup>, Jennie Hui<sup>52,84</sup>, Joe Hung<sup>85,86</sup>, Bo Isomaa<sup>87,88</sup>, Paul R V Johnson<sup>4,89</sup>, Torben Jørgensen<sup>90,91</sup>, Antti Jula<sup>92</sup>, Marika Kaakinen<sup>93</sup>, Jaakko Kaprio<sup>94-96</sup>, Y Antero Kesaniemi<sup>97</sup>, Mika Kivimaki<sup>36</sup>, Beatrice Knight<sup>98</sup>, Seppo Koskinen<sup>99</sup>, Peter Kovacs<sup>100</sup>, Kirsten Ohm Kyvik<sup>101</sup>, GMark Lathrop<sup>79</sup>, Debbie A Lawlor<sup>38</sup>, Olivier Le Bacquer<sup>13</sup>, Cécile Lecoeur<sup>13</sup>, Yun Li<sup>10</sup>, Valeriya Lyssenko<sup>102</sup>, Robert Mahley<sup>103</sup>, Massimo Mangino<sup>9</sup>, Alisa KManning<sup>1</sup>, Maria Teresa Martinez-Larrad<sup>39</sup>, Jarred B McAteer<sup>6,104,105</sup>, Laura J McCulloch<sup>4</sup>, Ruth McPherson<sup>106</sup>, Christa Meisinger<sup>21</sup>, David Melzer<sup>28</sup>, David Meyre<sup>13</sup>, Braxton DMitchell<sup>45</sup>, Mario A Morcken<sup>47</sup>, Sutapa Mukherjee<sup>66,83</sup>, Silvia Naitza<sup>65</sup>, Narisu Narisu<sup>47</sup>, Matthew J Neville<sup>4,107</sup>, Ben A Oostra<sup>108</sup>, Marco Orrù<sup>65</sup>, Ruth Pakyz<sup>45</sup>, Colin NA Palmer<sup>109</sup>, Giuseppe Paolisso<sup>110</sup>, Cristian Pattaro<sup>82</sup>, Daniel Pearson<sup>47</sup>, John F Peden<sup>5,27</sup>, Nancy LPedersen<sup>42</sup>, Markus Perola<sup>96,111,112</sup>, Andreas F H Pfeiffer<sup>67,68</sup>, Irene Pichler<sup>82</sup>, Ozren Polasek<sup>113</sup>, Danielle Posthuma<sup>23,114</sup>, Simon CPotter<sup>8</sup>, Anneli Pouta<sup>115</sup>, Michael A Province<sup>44</sup>, Bruce MPSaty<sup>116,117</sup>, Wolfgang Rathmann<sup>118</sup>, Nigel WRayner<sup>4,5</sup>, Kenneth Rice<sup>119</sup>, Samuli Ripatti<sup>96,111</sup>, Fernando Rivadeneira<sup>22,120</sup>, Michael Roden<sup>81,121</sup>, Olov Rolandsson<sup>122</sup>, Amelli Sandbaek<sup>123</sup>, Manjinder Sandhu<sup>3,124</sup>, Serena Sanna<sup>65</sup>, Avan Aihie Sayer<sup>125</sup>, Paul Scheet<sup>126</sup>, Laura J Scott<sup>10</sup>, Udo Seedorf<sup>127</sup>, Stephen J Sharp<sup>3</sup>, Beverley Shields<sup>98</sup>, Gunnar Sigurðsson<sup>55,56</sup>, Eric J GSijbrands<sup>22,120</sup>, Angela Silveira<sup>128</sup>, Laila Simpson<sup>64,66</sup>, Andrew Singleton<sup>129</sup>, Nicholas LSmith<sup>130,131</sup>, Ulla Sovio<sup>17</sup>, Amy Swift<sup>47</sup>, Holly Syddall<sup>125</sup>, Ann-Christine Syvänen<sup>132</sup>, Toshiko Tanaka<sup>133,134</sup>, Barbara Thorand<sup>21</sup>, Jean Tichet<sup>135</sup>, Anke Tönjes<sup>60,136</sup>, Tiinamaija Tuomi<sup>87,137</sup>, André GUitterlinden<sup>22,120</sup>, Ko Willems van Dijk<sup>70,138</sup>, Mandy van Hoek<sup>120</sup>, Dhiraj Varna<sup>8</sup>, Sophie Visvikis-Siest<sup>139</sup>, Veronique Vitart<sup>25</sup>, Nicole Vogelzangs<sup>140</sup>,

Gérard Waeber<sup>141</sup>, Peter J Wagner<sup>96,111</sup>, Andrew Walley<sup>142</sup>, GBragi Walters<sup>19</sup>, Kim L Ward<sup>64,66</sup>, Hugh Watkins<sup>5,27</sup>, Michael N Weedon<sup>28</sup>, Sarah H Wild<sup>24</sup>, Gonneke Willemssen<sup>23</sup>, Jaqueline CM Witterman<sup>22</sup>, John WGYarnell<sup>143</sup>, Eleftheria Zeggini<sup>5,8</sup>, Diana Zelenika<sup>79</sup>, Björn Zethelius<sup>43,144</sup>, Guangju Zhai<sup>9</sup>, Jing Hua Zhao<sup>3</sup>, MCarola Zillikens<sup>120</sup>, DIAGRAM Consortium<sup>145</sup>, GIANT Consortium<sup>145</sup>, Global BPgen Consortium<sup>145</sup>, Ingrid B Borecki<sup>44</sup>, Ruth J F Loos<sup>3</sup>, Pierre Meneton<sup>80</sup>, Patrik KEMagnusson<sup>42</sup>, David MNathan<sup>104,105</sup>, Gordon H Williams<sup>69,105</sup>, Andrew THattersley<sup>98</sup>, Kaisa Silander<sup>96,111</sup>, Veikko Salomaa<sup>146</sup>, George Davey Smith<sup>38</sup>, Stefan R Bornstein<sup>73</sup>, Peter Schwarz<sup>73</sup>, Joachim Spranger<sup>67,68</sup>, Fredrik Karpe<sup>4,107</sup>, Alan R Shuldiner<sup>45</sup>, Cyrus Cooper<sup>125</sup>, George V Dedoussis<sup>34</sup>, Manuel Serrano-Rios<sup>39</sup>, Andrew DMorris<sup>109</sup>, Lars Lind<sup>132</sup>, Lyle J Palmer<sup>64,66,84</sup>, Frank B Hu<sup>47,148</sup>, Paul WFranks<sup>149</sup>, Shah Ebrahim<sup>150</sup>, Michael Marmot<sup>36</sup>, WH Linda Kao<sup>33,151,152</sup>, James SPankow<sup>153</sup>, Michael J Sampson<sup>154</sup>, Johanna Kuusisto<sup>155</sup>, Markku Laakso<sup>155</sup>, Torben Hansen<sup>31,156</sup>, Oluf Pedersen<sup>31,59,157</sup>, Peter Paul Pramstaller<sup>82,158,159</sup>, H Erich Wichmann<sup>21,160,161</sup>, Thomas Illig<sup>21</sup>, Igor Rudan<sup>24,162,163</sup>, Alan F Wright<sup>25</sup>, Michael Stumvoll<sup>60</sup>, Harry Campbell<sup>24</sup>, James F Wilson<sup>24</sup>, Anders Hamsten on behalf of Procardis Consortium<sup>128</sup>, Richard N Bergman<sup>164</sup>, Thomas A Buchanan<sup>164,165</sup>, Francis SCollins<sup>47</sup>, Karen LMohlke<sup>166</sup>, Jaakko Tuomilehto<sup>94,167, 168</sup>, Timo T Valle<sup>167</sup>, David Altshuler<sup>6,7,104,105</sup>, Jerome I Rotter<sup>62</sup>, David SSiscovick<sup>169</sup>, Brenda WJ H Penninx<sup>140</sup>, Dorret I Boomsma<sup>23</sup>, Panos Deloukas<sup>8</sup>, Timothy DSpector<sup>8,9</sup>, Timothy MFrayingling<sup>28</sup>, Luigi Ferrucci<sup>170</sup>, Augustine Kong<sup>19</sup>, Unnur Thorsteinsdottir<sup>19,171</sup>, Kari Stefansson<sup>19,171</sup>, Cornelia Mvan Duijn<sup>22</sup>, Yurii SAulchenko<sup>22</sup>, Antonio Cao<sup>65</sup>, Angelo Scuteri<sup>172,177</sup>, David Schlessinger<sup>47</sup>, Manuela Uda<sup>65</sup>, Aimo Ruokonen<sup>173</sup>, Marjo-Riitta Jarvelin<sup>17,93, 174</sup>, Dawn MWaterworth<sup>26</sup>, Peter Vollenweider<sup>141</sup>, Leena Peltonen<sup>8,48,96,111,112</sup>, Vincent Mooser<sup>26</sup>, Goncalo R Abecasis<sup>10</sup>, Nicholas J Wareham<sup>3</sup>, Robert Sladek<sup>40,41</sup>, Philippe Froguel<sup>13,142</sup>, Richard MWatanabe<sup>164,175</sup>, James B Meigs<sup>35,105</sup>, Leif Groop<sup>102</sup>, Michael Boehnke<sup>10</sup>, Mark I McCarthy<sup>4,5,107</sup>, Jose CFlorez<sup>6,7,104,105</sup> & Inês Barroso<sup>11</sup> for the MAGIC investigators

1Department of Biostatistics, Boston University School of Public Health, Boston, Massachusetts, USA. 2National Heart, Lung, and Blood Institute's Framingham Heart Study, Framingham, Massachusetts, USA. 3Medical Research Council (MRC), Epidemiology Unit, Institute of Metabolic Science, Addenbrooke's Hospital, Cambridge, UK. 4Oxford Centre for Diabetes, Endocrinology and Metabolism, University of Oxford, Oxford, UK. 5Wellcome Trust Centre for Human Genetics, University of Oxford, Oxford, UK. 6Program in Medical and Population Genetics, Broad Institute, Cambridge, Massachusetts, USA. 7Center for Human Genetic Research, Massachusetts General Hospital, Boston, Massachusetts, USA. 8Wellcome Trust Sanger Institute, Hinxton, Cambridge, UK. 9Twin Research and Genetic Epidemiology Department, King's College London, St Thomas' Hospital Campus, London, UK. 10Center for Statistical Genetics, Department of Biostatistics, University of Michigan School of Public Health, Ann Arbor, Michigan, USA. 11Metabolic Disease Group, Wellcome Trust Sanger Institute, Hinxton, Cambridge, UK. 12Cardiovascular Health Research Unit and Department of Medicine, University of Washington, Seattle, Washington, USA. 13Centre National de la Recherche Scientifique-Unité Mixte de Recherche 8090, Pasteur Institute, Lille 2-Droit et Santé University, Lille, France. 14Department of Medical Genetics, University of Lausanne, Lausanne, Switzerland. 15University Institute of Social and Preventative Medicine, Centre Hospitalier Universitaire Vaudois (CHUV) and University of Lausanne, Lausanne, Switzerland. 16Swiss Institute of Bioinformatics, Lausanne, Switzerland. 17Department of Epidemiology and Public Health, Imperial College London, Faculty of Medicine, Norfolk Place, London, UK. 18Boston University Data Coordinating Center, Boston, Massachusetts, USA. 19deCODE Genetics, Reykjavik, Iceland. 20Department of Human Genetics, Leiden University Medical Centre, Leiden, The Netherlands. 21Institute of Epidemiology, Helmholtz Zentrum Muenchen, German Research Center for Environmental Health, Neuherberg, Germany. 22Department of Epidemiology, Erasmus Medical College, Rotterdam, The Netherlands. 23Department of Biological Psychology, VU University Amsterdam, Amsterdam, The Netherlands. 24Centre for Population Health Sciences, University of Edinburgh, Edinburgh, UK. 25MRC Human Genetics Unit, Institute of Genetics and Molecular Medicine, Edinburgh, UK. 26Division of Genetics, Research and Development, GlaxoSmithKline, King of Prussia, Pennsylvania, USA. 27Department of Cardiovascular Medicine, University of Oxford, Oxford, UK. 28Genetics of Complex Traits, Institute of Biomedical and Clinical Sciences, Peninsula College of Medicine and Dentistry, University of Exeter, Exeter, UK. 29National Institute of Aging, Baltimore, Maryland, USA. 30Unit for Child and Adolescent Health and Welfare, National Institute for Health and Welfare, Biocenter Oulu, University of Oulu, Oulu, Finland. 31Hagedorn Research Institute, Gentofte, Denmark. 32Department of Medicine and Therapeutics, Level 7, Ninewells Hospital and Medical School, Dundee, UK. 33Department of Epidemiology, Bloomberg School of Public Health, Johns Hopkins

University, Baltimore, Maryland, USA. 34Department of Nutrition–Dietetics, Harokopio University, Athens, Greece. 35General Medicine Division, Massachusetts General Hospital, Boston, Massachusetts, USA. 36Department of Epidemiology and Public Health, University College London, London, UK. 37Departments of Nutrition and Epidemiology, Harvard School of Public Health, Boston, Massachusetts, USA. 38MRC Centre for Causal Analyses in Translational Epidemiology, University of Bristol, Bristol, UK. 39Fundación para la Investigación Biomédica del Hospital Clínico San Carlos, Madrid, Spain. 40Departments of Medicine and Human Genetics, McGill University, Montreal, Canada. 41Genome Quebec Innovation Centre, Montreal, Canada. 42Department of Medical Epidemiology and Biostatistics, Karolinska Institutet, Stockholm, Sweden. 43Department of Public Health and Caring Sciences, Uppsala University, Uppsala, Sweden. 44Division of Statistical Genomics, Department of Genetics, Washington University School of Medicine, St. Louis, Missouri, USA. 45Division of Endocrinology, Diabetes and Nutrition, University of Maryland School of Medicine, Baltimore, Maryland, USA. 46INSERM U859, Université de Lille-Nord de France, Lille, France. 47Genome Technology Branch, National Human Genome Research Institute, Bethesda, Maryland, USA. 48The Broad Institute, Cambridge, Massachusetts, USA. 49Leiden Genome Technology Center, Leiden University Medical Center, Leiden, The Netherlands. 50INSERM U780, Paris Sud University, Villejuif, France. 51The Heart Research Institute, Sydney, New South Wales, Australia. 52PathWest Laboratory of Western Australia, Department of Molecular Genetics, J Block, QEII Medical Centre, Nedlands West Australia, Australia. 53School of Surgery and Pathology, University of Western Australia, Nedlands West Australia, Australia. 54Department of Social Medicine, University of Bristol, Bristol, UK. 55Landspítali University Hospital, Reykjavík, Iceland. 56Icelandic Heart Association, Kopavogur, Iceland. 57The Human Genetics Center and Institute of Molecular Medicine, University of Texas Health Science Center, Houston, Texas, USA. 58Steno Diabetes Center, Gentofte, Denmark. 59Faculty of Health Science, University of Aarhus, Aarhus, Denmark. 60Department of Medicine, University of Leipzig, Leipzig, Germany. 61Endocrinology–Diabetology Unit, Corbeil-Essonnes Hospital, Essonnes, France. 62Medical Genetics Institute, Cedars-Sinai Medical Center, Los Angeles, California, USA. 63Clinical Trial Service Unit and Epidemiological Studies Unit, University of Oxford, Oxford, UK. 64Centre for Genetic Epidemiology and Biostatistics, University of Western Australia, Perth, Australia. 65Istituto di Neurogenetica e Neurofarmacologia (INN), Consiglio Nazionale delle Ricerche, c/o Cittadella Universitaria di Monserrato, Monserrato, Cagliari, Italy. 66Western Australian Sleep Disorders Research Institute, Queen Elizabeth Medical Centre II, Perth, Australia. 67Department of Endocrinology, Diabetes and Nutrition, Charité-Universitätsmedizin Berlin, Berlin, Germany. 68Department of Clinical Nutrition, German Institute of Human Nutrition Potsdam-Rehbruecke, Nuthetal, Germany. 69Division of Endocrinology, Diabetes, and Hypertension, Brigham and Women’s Hospital, Harvard Medical School, Boston, Massachusetts, USA. 70Department of Human Genetics, Leiden University Medical Centre, Leiden, The Netherlands. 71Department of Cardiovascular Research, Istituto di Ricerche Farmacologiche ‘Mario Negri’, Milan, Italy. 72Institut National de la Santé et de la Recherche Médicale, Institut National de la Recherche Agronomique, Université Paris 13, Bobigny Cedex, France. 73Department of Medicine III, Division Prevention and Care of Diabetes, University of Dresden, Dresden, Germany. 74Center for Human Nutrition, University of Texas Southwestern Medical Center, Dallas, Texas, USA. 75Department of Genetics and Pathology, Rudbeck Laboratory, Uppsala University, Uppsala, Sweden. 76Centre Hospitalier Universitaire, de Poitiers, Endocrinologie Diabetologie, CIC INSERM 0802, INSERM U927, Université de Poitiers, Unité de Formation et de Recherche, Médecine Pharmacie, Poitiers, France. 77Department of Public Health and Clinical Medicine, Section for Nutritional Research, Umeå University, Umeå, Sweden. 78Department of Clinical Sciences, Obstetrics and Gynecology, University of Oulu, University of Oulu, Finland. 79Centre National de Génotypage/Institut de génomique/Commissariat à l’énergie atomique, Evry Cedex, France. 80INSERM U872, Faculté de Médecine Paris Descartes, Paris Cedex, France. 81Institute for Clinical Diabetology, German Diabetes Center, Leibniz Center for Diabetes Research at Heinrich Heine University Dusseldorf, Dusseldorf, Germany. 82Institute of Genetic Medicine, European Academy Bozen/Bolzano (EURAC), Viale Druso, Bolzano, Italy, Affiliated Institute of the University Lubeck, Lubeck, Germany. 83Department of Pulmonary Physiology, Sir Charles Gairdner Hospital, Perth, Australia. 84Busselton Population Medical Research Foundation, Sir Charles Gairdner Hospital, Perth, Australia. 85Heart Institute of Western Australia, Sir Charles Gairdner Hospital, Nedlands West Australia, Australia. 86School of Medicine and Pharmacology, University of Western Australia, Nedlands West Australia, Australia. 87Folkhalsan Research Centre, Helsinki, Finland. 88Malmiska Municipal Health Care Center and Hospital, Jakobstad, Finland. 89Nuffield Department of Surgery, University of Oxford, Oxford, UK. 90Research Centre for Prevention and Health, Glostrup University Hospital, Glostrup, Denmark. 91Faculty of Health Science, University of Copenhagen, Copenhagen, Denmark. 92National Institute for Health and Welfare, Unit of Population Studies, Turku, Finland. 93Institute of Health Sciences and Biocenter Oulu, University of Oulu, Oulu, Finland. 94Department of Public Health, Faculty of Medicine, University of Helsinki, Helsinki, Finland. 95National Institute for Health and Welfare, Unit for Child and Adolescent Mental Health, Helsinki, Finland. 96Institute for Molecular Medicine Finland (FIMM), University of Helsinki, Helsinki, Finland. 97Department of Internal Medicine and Biocenter Oulu, Oulu, Finland. 98Diabetes Genetics, Institute of Biomedical and Clinical Science, Peninsula College of Medicine and Dentistry, University of Exeter, Exeter, UK. 99National Institute for Health and Welfare, Unit of Living Conditions, Health and Wellbeing, Helsinki, Finland. 100Interdisciplinary Centre for Clinical Research, University of Leipzig, Leipzig, Germany. 101The Danish Twin Registry, Epidemiology, Institute of Public Health, University of Southern Denmark, Odense, Denmark. 102Department of Clinical Sciences, Diabetes and Endocrinology, Lund University, University Hospital Malmö, Malmö, Sweden. 103Gladstone Institute of Cardiovascular Disease, University of California, San Francisco, California, USA. 104Diabetes Research Center, Diabetes Unit, Massachusetts General Hospital, Boston, Massachusetts, USA. 105Department of Medicine, Harvard Medical School, Boston, Massachusetts, USA. 106Division of Cardiology, University of Ottawa Heart Institute, Ottawa, Ontario, Canada. 107Oxford National Institute for Health Research, Biomedical Research Centre, Churchill Hospital, Oxford, UK. 108Department of Clinical Genetics, Erasmus Medical College, Rotterdam, The Netherlands. 109Biomedical Research Institute, University of Dundee, Ninewells Hospital and Medical School, Dundee, UK. 110Department of Geriatric Medicine and Metabolic Disease, Second University of Naples, Naples, Italy. 111National Institute for Health and Welfare, Unit of Public Health Genomics, Helsinki, Finland. 112Department of Medical Genetics, University of Helsinki, Helsinki, Finland. 113Department of Medical Statistics, Epidemiology and Medical Informatics, Andrija Stampar School of Public Health, Medical School, University of Zagreb, Rockefellerova, Zagreb, Croatia. 114Department of Clinical Genetics, VU University and Medical Center, Amsterdam, The Netherlands. 115Department of Obstetrics and Gynaecology, Oulu University Hospital, Oulu, Finland. 116Departments of Medicine, Epidemiology and Health Services, University of Washington, Seattle, Washington, USA. 117Group Health Research Institute, Group Health Cooperative, Seattle, Washington, USA. 118Institute of Biometrics and Epidemiology, German Diabetes Centre, Leibniz Centre at Heinrich Heine

University Düsseldorf, Düsseldorf, Germany. 119Department of Biostatistics, University of Washington, Seattle, Washington, USA. 120Department of Internal Medicine, Erasmus Medical College, Rotterdam, The Netherlands. 121Department of Metabolic Diseases, Heinrich Heine University Düsseldorf, Düsseldorf, Germany. 122Department of Public Health and Clinical Medicine, Section for Family Medicine, Umeå University, Umeå, Sweden. 123School of Public Health, Department of General Practice, University of Aarhus, Aarhus, Denmark. 124Department of Public Health and Primary Care, Strangeways Research Laboratory, University of Cambridge, Cambridge, UK. 125MRC Epidemiology Resource Centre, University of Southampton, Southampton General Hospital, Southampton, UK. 126Department of Epidemiology, University of Texas, M.D. Anderson Cancer Center, Houston, Texas, USA. 127Leibniz-Institut für Arterioskleroseforschung an der Universität Münster, Münster, Germany. 128Atherosclerosis Research Unit, Department of Medicine, Karolinska Institutet, Stockholm, Sweden. 129Laboratory of Neurogenetics, National Institute on Aging, Bethesda, Maryland, USA. 130Department of Epidemiology, University of Washington, Seattle, Washington, USA. 131Seattle Epidemiologic Research and Information Center, Department of Veterans Affairs Office of Research and Development, Seattle, Washington, USA. 132Department of Medical Sciences, Uppsala University, Uppsala, Sweden. 133Medstar Research Institute, Baltimore, Maryland, USA. 134Clinical Research Branch, National Institute on Aging, Baltimore, Maryland, USA. 135Institut interrégional pour la santé (IRSA), La Riche, France. 136Coordination Centre for Clinical Trials, University of Leipzig, Leipzig, Germany. 137Department of Medicine, Helsinki University Hospital, University of Helsinki, Helsinki, Finland. 138Department of Internal Medicine, Leiden University Medical Centre, Leiden, The Netherlands. 139Research Unit, Cardiovascular Genetics, Nancy University Henri Poincaré, Nancy, France. 140EMGO Institute for Health and Care Research, Department of Psychiatry, VU University Medical Center, Amsterdam, The Netherlands. 141Department of Internal Medicine, Centre Hospitalier Universitaire Vaudois, Lausanne, Switzerland. 142Genomic Medicine, Imperial College London, Hammersmith Hospital, London, UK. 143Epidemiology and Public Health, Queen's University Belfast, Belfast, UK. 144Medical Products Agency, Uppsala, Sweden. 145See Supplementary Note for a full list of authors. 146National Institute for Health and Welfare, Unit of Chronic Disease Epidemiology and Prevention, Helsinki, Finland. 147Departments of Nutrition and Epidemiology, Harvard School of Public Health, Boston, Massachusetts, USA. 148Channing Laboratory, Brigham and Women's Hospital and Harvard Medical School, Boston, Massachusetts, USA. 149Genetic Epidemiology and Clinical Research Group, Department of Public Health and Clinical Medicine, Section for Medicine, Umeå University Hospital, Umeå, Sweden. 150London School of Hygiene and Tropical Medicine, London, UK. 151Department of Medicine, School of Medicine, Johns Hopkins University, Baltimore, Maryland, USA. 152The Welch Center for Prevention, Epidemiology, and Clinical Research, School of Medicine and Bloomberg School of Public Health, Johns Hopkins University, Baltimore, Maryland, USA. 153Division of Epidemiology and Community Health, School of Public Health, University of Minnesota, Minneapolis, Minnesota, USA. 154Department of Endocrinology and Diabetes, Norfolk and Norwich University Hospital National Health Service Trust, Norwich, UK. 155Department of Medicine, University of Kuopio and Kuopio University Hospital, Kuopio, Finland. 156Faculty of Health Science, University of Southern Denmark, Odense, Denmark. 157Institute of Biomedical Science, Faculty of Health Science, University of Copenhagen, Copenhagen, Denmark. 158Department of Neurology, General Central Hospital, Bolzano, Italy. 159Department of Neurology, University of Lübeck, Lübeck, Germany. 160Institute of Medical Informatics, Biometry and Epidemiology, Ludwig-Maximilians-Universität, Munich, Germany. 161Klinikum Grosshadern, Munich, Germany. 162School of Medicine, University of Split, Split, Croatia. 163Gen-Info Ltd., Zagreb, Croatia. 164Department of Physiology and Biophysics, Keck School of Medicine, University of Southern California, Los Angeles, California, USA. 165Department of Medicine, Division of Endocrinology, Keck School of Medicine, University of Southern California, Los Angeles, California, USA. 166Department of Genetics, University of North Carolina, Chapel Hill, North Carolina, USA. 167National Institute for Health and Welfare, Unit of Diabetes Prevention, Helsinki, Finland. 168South Ostrobothnia Central Hospital, Seinäjoki, Finland. 169Departments of Medicine and Epidemiology, University of Washington, Seattle, Washington, USA. 170Longitudinal Studies Section, Clinical Research Branch, National Institute on Aging, NIH, Baltimore, Maryland, USA. 171Faculty of Medicine, University of Iceland, Reykjavik, Iceland. 172Lab of Cardiovascular Sciences, National Institute on Aging, National Institutes of Health, Baltimore, Maryland, USA. 173Department of Clinical Sciences/Clinical Chemistry, University of Oulu, Oulu, Finland. 174National Institute of Health and Welfare, Oulu, Finland. 175Department of Preventive Medicine, Keck School of Medicine, University of Southern California, Los Angeles, California, USA. 176MRC-Health Protection Agency Centre for Environment and Health, Imperial College London, London, UK. 177UOC Geriatria, Istituto Nazionale Ricovero e cura per Anziani (INRCA) IRCCS, Rome, Italy. 178These authors contributed equally to this work. Correspondence should be addressed to M.B. (boehnke@umich.edu), M.I.M. (mark.mccarthy@dr1.ox.ac.uk), J.C.F. (jcflorez@partners.org) or I.B. (ib1@sanger.ac.uk).

## 2hr glucose

Richa Saxena,<sup>1,2</sup> Marie-France Hivert,<sup>3,4</sup> Claudia Langenberg,<sup>5</sup> Toshiko Tanaka,<sup>6,7</sup> James S Pankow,<sup>8</sup> Peter Vollenweider,<sup>9</sup> Valeriya Lyssenko,<sup>10</sup> Nabila Bouatia-Naji,<sup>11</sup> Josée Dupuis,<sup>12</sup> Anne U Jackson,<sup>13</sup> W H Linda Kao,<sup>14,15,16</sup> Man Li,<sup>14</sup> Nicole L Glazer,<sup>17</sup> Alisa K Manning,<sup>12</sup> Jian'an Luan,<sup>5</sup> Heather M Stringham,<sup>13</sup> Inga Prokopenko,<sup>18,19</sup> Toby Johnson,<sup>20</sup> Niels Grarup,<sup>21</sup> Trine W Boesgaard,<sup>21</sup> Cécile Lecoeur,<sup>11</sup> Peter Shrader,<sup>3</sup> Jeffrey O'Connell,<sup>22</sup> Erik Ingelsson,<sup>23,24</sup> David J Couper,<sup>25</sup> Kenneth Rice,<sup>26</sup> Kijoung Song,<sup>27</sup> Camilla H Andreasen,<sup>21</sup> Christian Dina,<sup>11</sup> Anna Köttgen,<sup>14</sup> Olivier Le Bacquer,<sup>11</sup> François Pattou,<sup>28,29</sup> Jalal Taneera,<sup>10</sup> Valgerdur Steinthorsdottir,<sup>30</sup> Denis Rybin,<sup>31</sup> Kristin Ardlie,<sup>32</sup> Michael Sampson,<sup>33</sup> Lu Qi,<sup>34</sup> Mandy van Hoek,<sup>35</sup> Michael N Weedon,<sup>36</sup> Yuii S Aulchenko,<sup>37</sup> Benjamin F Voight,<sup>1,2</sup> Harald Gallert,<sup>38</sup> Beverley Balkau,<sup>39</sup> Richard N Bergman,<sup>40</sup> Suzette J Bielinski,<sup>41</sup> Amelie Bonnefond,<sup>11</sup> Lori L

Bonnycastle,<sup>42</sup> Knut Borch-Johnsen,<sup>43</sup> Yvonne Böttcher,<sup>44</sup> Eric Brunner,<sup>45</sup> Thomas A Buchanan,<sup>40,46</sup> Suzannah J Bumpstead,<sup>47</sup> Christine Cavalcanti-Proença,<sup>11</sup> Guillaume Charpentier,<sup>48</sup> Yii-Der Ida Chen,<sup>49</sup> Peter S Chines,<sup>42</sup> Francis S Collins,<sup>42</sup> Marilyn Cornelis,<sup>34</sup> Gabriel J Crawford,<sup>1</sup> Jerome Delplanque,<sup>11</sup> Alex Doney,<sup>50</sup> Josephine M Egan,<sup>51</sup> Michael R Erdos,<sup>42</sup> Mathieu Firmann,<sup>9</sup> Nita G Forouhi,<sup>5</sup> Caroline S Fox,<sup>52,53</sup> Mark O Goodarzi,<sup>49</sup> Jürgen Graessler,<sup>54</sup> Aroon Hingorani,<sup>45</sup> Bo Isomaa,<sup>55,56</sup> Torben Jørgensen,<sup>57,58</sup> Mika Kivimäki,<sup>45</sup> Peter Kovacs,<sup>59</sup> Knut Krohn,<sup>59</sup> Meena Kumari,<sup>45</sup> Torsten Lauritzen,<sup>60</sup> Claire Lévy-Marchal,<sup>61,62</sup> Vladimir Mayor,<sup>9</sup> Jarred B McAteer,<sup>1,2,63</sup> David Meyre,<sup>11</sup> Braxton D Mitchell,<sup>22</sup> Karen L Mohlke,<sup>64</sup> Mario A Morken,<sup>42</sup> Narisu Narisu,<sup>42</sup> Colin N A Palmer,<sup>65</sup> Ruth Pakyz,<sup>22</sup> Laura Pascoe,<sup>66</sup> Felicity Payne,<sup>47</sup> Daniel Pearson,<sup>42</sup> Wolfgang Rathmann,<sup>67</sup> Anneli Sandbaek,<sup>60</sup> Avan Aihie Sayer,<sup>68</sup> Laura J Scott,<sup>13</sup> Stephen J Sharp,<sup>5</sup> Eric Sijbrands,<sup>69</sup> Andrew Singleton,<sup>70</sup> David S Siscovick,<sup>71</sup> Nicholas L Smith,<sup>72,73</sup> Thomas Sparso,<sup>21</sup> Amy J Swift,<sup>42</sup> Holly Syddall,<sup>68</sup> Gudmar Thorleifsson,<sup>30</sup> Anke Tönjes,<sup>44,74</sup> Tiinamaija Tuomi,<sup>55,75</sup> Jaakko Tuomilehto,<sup>75,76</sup> Timo T Valle,<sup>77</sup> Gérard Waeber,<sup>9</sup> Andrew Walley,<sup>78</sup> Dawn M Waterworth,<sup>27</sup> Eleftheria Zeggini,<sup>47</sup> Jing Hua Zhao,<sup>5</sup> GIANT consortium,<sup>79</sup> Thomas Illig,<sup>38</sup> H Erich Wichmann,<sup>38,80,81</sup> James F Wilson,<sup>82</sup> Cornelia van Duijn,<sup>69</sup> Frank B Hu,<sup>34,83</sup> Andrew D Morris,<sup>65</sup> Timothy M Frayling,<sup>84,85</sup> Andrew T Hattersley,<sup>84,85</sup> Ummur Thorsteinsdottir,<sup>30,86</sup> Kari Stefansson,<sup>30,86</sup> Peter Nilsson,<sup>87</sup> Ann-Christine Syvänen,<sup>88</sup> Alan R Shuldiner,<sup>22,89</sup> Mark Walker,<sup>66</sup> Stefan R Bornstein,<sup>54</sup> Peter Schwarz,<sup>54</sup> Gordon H Williams,<sup>4,52</sup> David M Nathan,<sup>4,63</sup> Johanna Kuusisto,<sup>90</sup> Markku Laakso,<sup>90</sup> Cyrus Cooper,<sup>68</sup> Michael Marmot,<sup>45</sup> Luigi Ferrucci,<sup>7</sup> Vincent Mooser,<sup>27</sup> Michael Stumvoll,<sup>44</sup> Ruth J F Loos,<sup>5</sup> David Altshuler,<sup>1,2</sup> Bruce M Psaty,<sup>91</sup> Jerome I Rotter,<sup>49</sup> Eric Boerwinkle,<sup>92</sup> Torben Hansen,<sup>21,93</sup> Oluf Pedersen,<sup>21,94</sup> Jose C Florez,<sup>1,2,4,63</sup> Mark I McCarthy,<sup>18,19,95</sup> Michael Boehnke,<sup>13</sup> Inês Barroso,<sup>47</sup> Robert Sladek,<sup>96,97</sup> Philippe Froguel,<sup>11,78</sup> James B Meigs,<sup>3,4</sup> Leif Groop,<sup>10</sup> Nicholas J Wareham,<sup>5</sup> and Richard M Watanabe<sup>40,98</sup>, for the MAGIC investigators

1Program in Medical and Population Genetics, Broad Institute of Harvard and Massachusetts Institute of Technology, Cambridge, Massachusetts, USA. 2Center for Human Genetic Research, Massachusetts General Hospital, Boston, Massachusetts, USA. 3General Medicine Division, Massachusetts General Hospital, Boston, Massachusetts, USA. 4Department of Medicine, Harvard Medical School, Boston, Massachusetts, USA. 5Medical Research Council Epidemiology Unit, Institute of Metabolic Science, Addenbrooke's Hospital, Cambridge, UK. 6Medstar Research Institute, Baltimore, Maryland, USA. 7Clinical Research Branch, National Institute on Aging, Baltimore, Maryland, USA. 8Division of Epidemiology and Community Health, School of Public Health, University of Minnesota, Minneapolis, Minnesota, USA. 9Department of Internal Medicine, Centre Hospitalier Universitaire Vaudois, Lausanne, Switzerland. 10Department of Clinical Sciences, Diabetes and Endocrinology, Lund University, University Hospital Malmö, Malmö, Sweden. 11Centre National de la Recherche Scientifique–Unité Mixte de Recherche 8090, Pasteur Institute, Lille 2-Droit et Santé University, Lille, France. 12Department of Biostatistics, Boston University School of Public Health, Boston, Massachusetts, USA. 13Center for Statistical Genetics, Department of Biostatistics, University of Michigan School of Public Health, Ann Arbor, Michigan, USA. 14Department of Epidemiology, Bloomberg School of Public Health, Johns Hopkins University, Baltimore, Maryland, USA. 15Department of Medicine, School of Medicine and Bloomberg School of Public Health, Johns Hopkins University, Baltimore, Maryland, USA. 16The Welch Center for Prevention, Epidemiology and Clinical Research, School of Medicine and Bloomberg School of Public Health, Johns Hopkins University, Baltimore, Maryland, USA. 17Cardiovascular Health Research Unit and Department of Medicine, University of Washington, Seattle, Washington, USA. 18Oxford Centre for Diabetes, Endocrinology and Metabolism, University of Oxford, Oxford, UK. 19Wellcome Trust Centre for Human Genetics, University of Oxford, Oxford, UK. 20Department of Medical Genetics, University of Lausanne, Lausanne, Switzerland. 21Hagedorn Research Institute, Gentofte, Denmark. 22Division of Endocrinology, Diabetes and Nutrition, University of Maryland School of Medicine, Baltimore, Maryland, USA. 23Department of Medical Epidemiology and Biostatistics, Karolinska Institutet, Stockholm, Sweden. 24Department of Public Health and Caring Sciences, Uppsala University, Uppsala, Sweden. 25Collaborative Studies Coordinating Center, Department of Biostatistics, University of North Carolina at Chapel Hill, Chapel Hill, North Carolina, USA. 26Department of Biostatistics, University of Washington, Seattle, Washington, USA. 27Genetics, Drug Discovery, GlaxoSmith Kline, King of Prussia, Pennsylvania, USA. 28Institut National de la Santé et de la recherche médicale (INSERM), Université de Lille-Nord de France, Lille, France. 29Centre Hospitalier Régional et Universitaire de Lille, Lille, France. 30deCODE Genetics, Reykjavik, Iceland. 31Boston University Data Coordinating Center, Boston, Massachusetts, USA. 32Broad Institute of Harvard and Massachusetts Institute of Technology, Cambridge, Massachusetts, USA. 33Department of Endocrinology and Diabetes, Norfolk and Norwich University Hospital National Health Service Trust,

Norwich, UK. 34Departments of Nutrition and Epidemiology, Harvard School of Public Health, Boston, Massachusetts, USA. 35Department of Internal Medicine, Erasmus University Medical Center, Rotterdam, The Netherlands. 36Peninsula College of Medicine and Dentistry, University of Exeter, Exeter, UK. 37Department of Epidemiology and Biostatistics, Erasmus University Medical Center, Rotterdam, The Netherlands. 38Institute of Epidemiology, Helmholtz Zentrum Muenchen, Neuherberg, Germany. 39INSERM, Villejuif, University Paris-Sud, Orsay, France. 40Department of Physiology and Biophysics, Keck School of Medicine, University of Southern California, Los Angeles, California, USA. 41Mayo Clinic College of Medicine, Rochester, Minnesota, USA. 42Genome Technology Branch, National Human Genome Research Institute, Bethesda, Maryland, USA. 43Steno Diabetes Center, Gentofte, Copenhagen, Denmark, and Faculty of Health Science, University of Aarhus, Aarhus, Denmark. 44Department of Medicine, University of Leipzig, Leipzig, Germany. 45Department of Epidemiology and Public Health, University College London, London, UK. 46Department of Medicine, Division of Endocrinology, Keck School of Medicine, University of Southern California, Los Angeles, California, USA. 47Wellcome Trust Sanger Institute, Hinxton, Cambridge, UK. 48Endocrinology-Diabetology Unit, Corbeil-Essonnes Hospital, Essonnes, France. 49Medical Genetics Institute, Cedars-Sinai Medical Center, Los Angeles, California, USA. 50Department of Medicine and Therapeutics, Ninewells Hospital and Medical School, Dundee, UK. 51Laboratory of Clinical Investigation, National Institute of Aging, Baltimore, Maryland, USA. 52Division of Endocrinology, Diabetes, and Hypertension, Brigham and Women's Hospital, Harvard Medical School, Boston, Massachusetts, USA. 53The National Heart, Lung, and Blood Institute's Framingham Heart Study, Framingham, Massachusetts, USA. 54Department of Medicine III, Division Prevention and Care of Diabetes, University of Dresden, Dresden, Germany. 55Folkhalsan Research Centre, Helsinki, Finland. 56Malmiska Municipal Health Care Center and Hospital, Jakobstad, Finland. 57Research Centre for Prevention and Health, Glostrup University Hospital, Glostrup, Denmark. 58Faculty of Health Science, University of Copenhagen, Copenhagen, Denmark. 59Interdisciplinary Centre for Clinical Research, University of Leipzig, Leipzig, Germany. 60Department of General Practice, University of Aarhus, Aarhus, Denmark. 61INSERM, Robert Debre Hospital, Paris, France. 62Paris Diderot University, Paris, France. 63Diabetes Research Center, Diabetes Unit, Massachusetts General Hospital, Boston, Massachusetts, USA. 64Department of Genetics, University of North Carolina, Chapel Hill, North Carolina, USA. 65Biomedical Research Institute, University of Dundee, Ninewells Hospital and Medical School, Dundee, UK. 66Institute of Cellular Medicine, Faculty of Medical Sciences, Framlington Place, Newcastle upon Tyne, UK. 67Institute of Biometrics and Epidemiology, German Diabetes Centre, Duesseldorf, Germany. 68MRC Epidemiology Resource Centre, University of Southampton, Southampton General Hospital, Southampton, UK. 69Department of Internal Medicine, Erasmus University Medical Center, Rotterdam, The Netherlands. 70Laboratory of Neurogenetics, National Institute on Aging, Bethesda, Maryland, USA. 71Departments of Medicine and Epidemiology, University of Washington, Seattle, Washington, USA. 72Department of Epidemiology, University of Washington, Seattle, Washington, USA. 73Epidemiologic Research and Information Center of the Department of Veterans Affairs Office of Research and Development, Seattle, Washington, USA. 74Coordination Centre for Clinical Trials, University of Leipzig, Leipzig, Germany. 75Department of Medicine, Helsinki University Hospital, University of Helsinki, Helsinki, Finland. 76Diabetes Unit, Department of Health Promotion and Chronic Disease Prevention, National Public Health Institute, Helsinki, Finland. 77Department of Epidemiology and Health Promotion, National Public Health Institute, Helsinki, Finland. 78Genomic Medicine, Imperial College London, Hammersmith Hospital, London, UK. 80Institute of Medical Informatics, Biometry and Epidemiology, Ludwig-Maximilians-Universität, Munich, Germany. 81Klinikum Grosshadern, Munich, Germany. 82Centre for Population Health Sciences, University of Edinburgh, Teviot Place, Edinburgh, UK. 83Channing Laboratory, Brigham and Women's Hospital and Harvard Medical School Boston, Massachusetts, USA. 84Diabetes Genetics, Institute of Biomedical and Clinical Science, Peninsula Medical School, University of Exeter, Exeter, UK. 85Genetics of Complex Traits, Institute of Biomedical and Clinical Science, Peninsula Medical School, University of Exeter, Exeter, UK. 86Faculty of Medicine, University of Iceland, Reykjavik, Iceland. 87Department of Clinical Sciences, Medicine, Lund University, University Hospital Malmö, Malmö, Sweden. 88Department of Medical Sciences, Uppsala University, Uppsala, Sweden. 89Geriatric Research and Education Clinical Center, Veterans Administration Medical Center, Baltimore, Maryland, USA. 90Department of Medicine, University of Kuopio and Kuopio University Hospital, Kuopio, Finland. 91Departments of Medicine, Epidemiology, and Health Services, University of Washington, Seattle, Washington, USA. 92The Human Genetics Center and Institute of Molecular Medicine, University of Texas Health Science Center, Houston, Texas, USA. 93Faculty of Health Science, University of Southern Denmark, Odense, Denmark. 94Institute of Biomedicine, Faculty of Health Science, University of Copenhagen and Faculty of Health Science, University of Aarhus, Denmark. 95Oxford National Institute of Health Research Biomedical Research Centre, Churchill Hospital, Oxford, UK. 96Department of Human Genetics, Faculty of Medicine, McGill University, Montreal, Quebec, Canada. 97Genome Quebec Innovation Centre, Montreal, Quebec, Canada. 98Department of Preventive Medicine, Keck School of Medicine, University of Southern California, Los Angeles, California, USA.

### **The DIAGRAM consortium**

Benjamin F Voight<sup>1,2,3</sup>, Laura J Scott<sup>4</sup>, Valgerdur Steinthorsdottir<sup>5</sup>, Andrew P Morris<sup>6</sup>, Christian Dina<sup>7,8</sup>, Ryan P Welch<sup>9</sup>, Eleftheria Zeggini<sup>6,10</sup>, Cornelia Huth<sup>11,12</sup>, Yuri S Aulchenko<sup>13</sup>, Gudmar Thorleifsson<sup>5</sup>, Laura J McCulloch<sup>14</sup>, Teresa Ferreira<sup>6</sup>, Harald Grallert<sup>11,12</sup>, Najaf Amin<sup>13</sup>, Guanming Wu<sup>15</sup>, Cristen J Willer<sup>4</sup>, Soumya Raychaudhuri<sup>1,2,16</sup>, Steve A McCarroll<sup>1,17</sup>, Claudia Langenberg<sup>18</sup>, Oliver M Hofmann<sup>19</sup>, Josée Dupuis<sup>20,21</sup>, Lu Qi<sup>22-24</sup>, Ayellet V Segre<sup>1,2,17</sup>, Mandy van Hoek<sup>25</sup>, Pau Navarro<sup>26</sup>, Kristin Ardlie<sup>1</sup>, Beverley Balkau<sup>27,28</sup>, Rafn Benediktsson<sup>29,30</sup>, Amanda J Bennett<sup>14</sup>, Roza Blagieva<sup>31</sup>, Eric Boerwinkle<sup>32</sup>, Lori L Bonnycastle<sup>33</sup>, Kristina Bengtsson Boström<sup>34</sup>, Bert Bravenboer<sup>35</sup>, Suzannah Bumpstead<sup>10</sup>, Noël P Burt<sup>1</sup>, Guillaume Charpentier<sup>36</sup>, Peter S Chines<sup>33</sup>, Marilyn Cornelis<sup>24</sup>, David J Couper<sup>37</sup>, Gabe Crawford<sup>1</sup>, Alex SF



Doney<sup>38,39</sup>, Katherine S Elliott<sup>6</sup>, Amanda L Elliott<sup>1,17,40</sup>, Michael R Erdos<sup>33</sup>, Caroline S Fox<sup>21,41</sup>, Christopher S Franklin<sup>42</sup>, Martha Ganser<sup>4</sup>, Christian Gieger<sup>11</sup>, Niels Grarup<sup>43</sup>, Todd Green<sup>1,2</sup>, Simon Griffin<sup>18</sup>, Christopher J Groves<sup>14</sup>, Candace Guiducci<sup>1</sup>, Samy Hadjadj<sup>44</sup>, Neelam Hassanali<sup>14</sup>, Christian Herder<sup>45</sup>, Bo Isomaa<sup>46,47</sup>, Anne U Jackson<sup>4</sup>, Paul RV Johnson<sup>48</sup>, Torben Jorgensen<sup>49,50</sup>, Wen HL Kao<sup>51,52</sup>, Norman Klopp<sup>11</sup>, Augustine Kong<sup>5</sup>, Peter Kraft<sup>22,23</sup>, Johanna Kuusisto<sup>53</sup>, Torsten Lauritzen<sup>54</sup>, Man Li<sup>51</sup>, Aloysius Lieverse<sup>55</sup>, Cecilia M Lindgren<sup>6</sup>, Valeriya Lyssenko<sup>56</sup>, Michel Marre<sup>57,58</sup>, Thomas Meitinger<sup>59,60</sup>, Kristian Midthjell<sup>61</sup>, Mario A Morken<sup>33</sup>, Narisu Narisu<sup>33</sup>, Peter Nilsson<sup>56</sup>, Katharine R Owen<sup>14</sup>, Felicity Payne<sup>10</sup>, John RB Perry<sup>62,63</sup>, Ann-Kristin Petersen<sup>11</sup>, Carl Platou<sup>61</sup>, Christine Proença<sup>7</sup>, Inga Prokopenko<sup>6,14</sup>, Wolfgang Rathmann<sup>64</sup>, N William Rayner<sup>6,14</sup>, Neil R Robertson<sup>6,14</sup>, Ghislain Rocheleau<sup>65-67</sup>, Michael Roden<sup>45,68</sup>, Michael J Sampson<sup>69</sup>, Richa Saxena<sup>1,2,40</sup>, Beverley M Shields<sup>62,63</sup>, Peter Shrader<sup>3,70</sup>, Gunnar Sigurdsson<sup>29,30</sup>, Thomas Sparso<sup>43</sup>, Klaus Strassburger<sup>64</sup>, Heather M Stringham<sup>4</sup>, Qi Sun<sup>22,23</sup>, Amy J Swift<sup>33</sup>, Barbara Thorand<sup>11</sup>, Jean Tichet<sup>71</sup>, Tiinamaija Tuomi<sup>46,72</sup>, Rob M van Dam<sup>24</sup>, Timon W van Haften<sup>73</sup>, Thijs van Herpt<sup>25,55</sup>, Jana V van Vliet-Ostaptchouk<sup>74</sup>, G Bragi Walters<sup>5</sup>, Michael N Weedon<sup>62,63</sup>, Cisca Wijmenga<sup>75</sup>, Jacqueline Witteman<sup>13</sup>, Richard N Bergman<sup>76</sup>, Stephane Cauchi<sup>7</sup>, Francis S Collins<sup>77</sup>, Anna L Gloyn<sup>14</sup>, Ulf Gyllenstein<sup>78</sup>, Torben Hansen<sup>43,79</sup>, Winston A Hide<sup>19</sup>, Graham A Hitman<sup>80</sup>, Albert Hofman<sup>13</sup>, David J Hunter<sup>22,23</sup>, Kristian Hveem<sup>61,81</sup>, Markku Laakso<sup>53</sup>, Karen L Mohlke<sup>82</sup>, Andrew D Morris<sup>38,39</sup>, Colin NA Palmer<sup>38,39</sup>, Peter P Pramstaller<sup>83</sup>, Igor Rudan<sup>42,84,85</sup>, Eric Sijbrands<sup>25</sup>, Lincoln D Stein<sup>15</sup>, Jaakko Tuomilehto<sup>86</sup>, Andre Uitterlinden<sup>25</sup>, Mark Walker<sup>87</sup>, Nicholas J Wareham<sup>18</sup>, Richard M Watanabe<sup>76,88</sup>, Goncalo R Abecasis<sup>4</sup>, Bernhard O Boehm<sup>31</sup>, Harry Campbell<sup>42</sup>, Mark J Daly<sup>1,2</sup>, Andrew T Hattersley<sup>62,63</sup>, Frank B Hu<sup>22-24</sup>, James B Meigs<sup>3,70</sup>, James S Pankow<sup>89</sup>, Oluf Pedersen<sup>43,90,91</sup>, H.-Erich Wichmann<sup>11,12,92</sup>, Inês Barroso<sup>10</sup>, Jose C Florez<sup>1,2,3,93</sup>, Timothy M Frayling<sup>62,63</sup>, Leif Groop<sup>56,72</sup>, Rob Sladek<sup>65-67</sup>, Unnur Thorsteinsdottir<sup>5,94</sup>, James F Wilson<sup>42</sup>, Thomas Illig<sup>11</sup>, Philippe Froguel<sup>7,95</sup>, Comelia M van Duijn<sup>13</sup>, Kari Stefansson<sup>5,94</sup>, David Altshuler<sup>1,2,3,17,40,93</sup>, Michael Boehnke<sup>4</sup>, Mark I McCarthy<sup>6,14,96</sup>.

1. Broad Institute of Harvard and Massachusetts Institute of Technology (MIT), Cambridge, Massachusetts 02142, USA 2. Center for Human Genetic Research, Massachusetts General Hospital, 185 Cambridge Street, Boston, Massachusetts 02114, USA 3. Department of Medicine, Harvard Medical School, Boston, Massachusetts 02115, USA 4. Department of Biostatistics, University of Michigan, Ann Arbor, Michigan 48109-2029, USA 5. deCODE Genetics, 101 Reykjavik, Iceland 6. Wellcome Trust Centre for Human Genetics, University of Oxford, Oxford, OX3 7BN, UK 7. CNRS-UMR-8090, Institute of Biology and Lille 2 University, Pasteur Institute, F-59019 Lille, France 8. INSERM UMR915 CNRS ERL3147 F-44007 Nantes, France 9. Bioinformatics Program, University of Michigan, Ann Arbor MI USA 48109 10 Wellcome Trust Sanger Institute, Hinxton, CB10 1HH, UK 11. Institute of Epidemiology, Helmholtz Zentrum Muenchen, 85764 Neuherberg, Germany 12. Institute of Medical Informatics, Biometry and Epidemiology, Ludwig-Maximilians-Universität, 81377 Munich, Germany 13. Department of Epidemiology, Erasmus University Medical Center, P.O. Box 2040, 3000 CA Rotterdam, The Netherlands. 14. Oxford Centre for Diabetes, Endocrinology and Metabolism, University of Oxford, OX3 7LJ, UK 15. Ontario Institute for Cancer Research, 101 College Street, Suite 800, Toronto, Ontario M5G 0A3, Canada 16. Division of Rheumatology, Immunology and Allergy, Brigham and Women's Hospital, Harvard Medical School, Boston, Massachusetts 02115, USA 17. Department of Molecular Biology, Harvard Medical School, Boston, Massachusetts 02115, USA 18. MRC Epidemiology Unit, Institute of Metabolic Science, Addenbrooke's Hospital, Cambridge CB2 0QQ, UK 19. Department of Biostatistics, Harvard School of Public Health, Boston, Massachusetts 02115, USA 20. Department of Biostatistics, Boston University School of Public Health, Boston, Massachusetts 02118, USA 21. National Heart, Lung, and Blood Institute's Framingham Heart Study, Framingham, Massachusetts 01702, USA 22. Department of Nutrition, Harvard School of Public Health, 665 Huntington Ave, Boston, MA 02115, USA 23. Department of Epidemiology, Harvard School of Public Health, 665 Huntington Ave, Boston, MA 02115, USA 24. Channing Laboratory, Dept. of Medicine, Brigham and Women's Hospital and Harvard Medical School, 181 Longwood Ave, Boston, MA 02115, USA 25. Department of Internal Medicine, Erasmus University Medical Centre, PO-Box 2040, 3000 CA Rotterdam, The Netherlands 26. MRC Human Genetics Unit, Institute of Genetics and Molecular Medicine, Western General Hospital, Edinburgh, EH4 2XU, UK 27. INSERM U780, F-94807 Villejuif, France 28. University Paris-Sud, F-91405 Orsay, France 29. Landspítali University Hospital, 101 Reykjavik, Iceland 30. Icelandic Heart Association, 201 Kopavogur, Iceland 31. Division of Endocrinology, Diabetes and Metabolism, Ulm University, 89081 Ulm, Germany 32. The Human Genetics Center and Institute of Molecular Medicine, University of Texas Health Science Center, Houston, Texas 77030, USA 33. National Human Genome Research Institute, National Institute of Health, Bethesda, Maryland 20892, USA 34. R&D Centre, Skaraborg Primary Care, 541 30 Skövde, Sweden 35. Department of Internal Medicine, Catharina Hospital, PO-Box 1350, 5602 ZA Eindhoven, The Netherlands 36. Endocrinology-Diabetology Unit, Corbeil-Essonnes Hospital, F-91100 Corbeil-Essonnes, France 37. Department of Biostatistics and Collaborative Studies Coordinating Center, University of North Carolina at Chapel Hill, Chapel Hill, North Carolina, 27599, USA 38. Diabetes

Research Centre, Biomedical Research Institute, University of Dundee, Ninewells Hospital, Dundee DD1 9SY, UK 39. Pharmacogenomics Centre, Biomedical Research Institute, University of Dundee, Ninewells Hospital, Dundee DD1 9SY, UK 40. Department of Genetics, Harvard Medical School, Boston, Massachusetts 02115, USA 41. Division of Endocrinology, Diabetes, and Hypertension, Brigham and Women's Hospital, Harvard Medical School, Boston, Massachusetts 02115, USA 42. Centre for Population Health Sciences, University of Edinburgh, Teviot Place, Edinburgh, EH8 9AG, UK 43. Hagedorn Research Institute, DK-2820 Gentofte, Denmark 44. Centre Hospitalier Universitaire de Poitiers, Endocrinologie Diabetologie, CIC INSERM 0801, INSERM U927, Université de Poitiers, UFR, Médecine Pharmacie, 86021 Poitiers Cedex, France 45. Institute for Clinical Diabetology, German Diabetes Center, Leibniz Center for Diabetes Research at Heinrich Heine University Dusseldorf, 40225 Dusseldorf, Germany 46. Folkhalsan Research Center, FIN-00014 Helsinki, Finland 47. Malmåska Municipal Health Center and Hospital, 68601 Jakobstad, Finland 48. Diabetes Research and Wellness Foundation Human Islet Isolation Facility and Oxford Islet Transplant Programme, University of Oxford, Old Road, Headington, Oxford, OX3 7LJ, UK 49. Research Centre for Prevention and Health, Glostrup University Hospital, DK-2600 Glostrup, Denmark 50. Faculty of Health Science, University of Copenhagen, 2200 Copenhagen, Denmark 51. Department of Epidemiology, Johns Hopkins University, Baltimore, Maryland 21287, USA 52. Department of Medicine, and Welch Center for Prevention, Epidemiology, and Clinical Research, Johns Hopkins University, Baltimore, Maryland 21287, USA 53. Department of Medicine, University of Kuopio and Kuopio University Hospital, FIN-70211 Kuopio, Finland 54. Department of General Medical Practice, University of Aarhus, DK-8000 Aarhus, Denmark 55. Department of Internal Medicine, Maxima MC, PO-Box 90052, 5600 PD Eindhoven, The Netherlands 56. Department of Clinical Sciences, Diabetes and Endocrinology Research Unit, University Hospital Malmö, Lund University, 205 02 Malmö, Sweden 57. Department of Endocrinology, Diabetology and Nutrition, Bichat-Claude Bernard University Hospital, Assistance Publique des Hôpitaux de Paris, 75870 Paris Cedex 18, France 58. INSERM U695, Université Paris 7, 75018 Paris, France 59. Institute of Human Genetics, Helmholtz Zentrum München, 85764 Neuherberg, Germany 60. Institute of Human Genetics, Klinikum rechts der Isar, Technische Universität München, 81675 München, Germany 61. Nord-Trøndelag Health Study (HUNT) Research Center, Department of Community Medicine and General Practice, Norwegian University of Science and Technology, NO-7491 Trondheim, Norway 62. Genetics of Complex Traits, Institute of Biomedical and Clinical Science, Peninsula Medical School, University of Exeter, Magdalen Road, Exeter EX1 2LU, UK 63. Diabetes Genetics, Institute of Biomedical and Clinical Science, Peninsula Medical School, University of Exeter, Barrack Road, Exeter EX2 5DW, UK 64. Institute of Biometrics and Epidemiology, German Diabetes Center, Leibniz Center for Diabetes Research at Heinrich Heine University Dusseldorf, 40225 Dusseldorf, Germany 65. Department of Human Genetics, McGill University, Montreal H3H 1P3, Canada 66. Department of Medicine, Faculty of Medicine, McGill University, Montreal, H3A 1A4, Canada 67. McGill University and Genome Quebec Innovation Centre, Montreal, H3A 1A4, Canada 68. Department of Metabolic Diseases, Heinrich Heine University Dusseldorf, 40225 Dusseldorf, Germany 69. Department of Endocrinology and Diabetes, Norfolk and Norwich University Hospital NHS Trust, Norwich, NR1 7UY, UK 70. General Medicine Division, Massachusetts General Hospital, Boston, Massachusetts, USA 71. Institut interrégional pour la Santé (IRSA), F-37521 La Riche, France 72. Department of Medicine, Helsinki University Hospital, University of Helsinki, FIN-00290 Helsinki, Finland 73. Department of Internal Medicine, University Medical Center Utrecht, 3584 CG Utrecht, The Netherlands 74. Molecular Genetics, Medical Biology Section, Department of Pathology and Medical Biology, University Medical Center Groningen and University of Groningen, 9700 RB Groningen, The Netherlands 75. Department of Genetics, University Medical Center Groningen and University of Groningen, 9713 EX Groningen, The Netherlands 76. Department of Physiology and Biophysics, University of Southern California School of Medicine, Los Angeles, California 90033, USA 77. National Institute of Health, Bethesda, Maryland 20892, USA 78. Department of Genetics and Pathology, Rudbeck Laboratory, Uppsala University, S-751 85 Uppsala, Sweden 79. University of Southern Denmark, DK-5230 Odense, Denmark 80. Centre for Diabetes, Barts and The London School of Medicine and Dentistry, Queen Mary University of London, London E1 2AT, UK 81. Department of Medicine, The Hospital of Levanger, N-7600 Levanger, Norway 82. Department of Genetics, University of North Carolina, Chapel Hill, North Carolina 27599, USA 83. Institute of Genetic Medicine, European Academy Bozen/Bolzano (EURAC), Viale Druso 1, 39100 Bolzano, Italy 84. Croatian Centre for Global Health, Faculty of Medicine, University of Split, Soltanska 2, 21000 Split, Croatia 85. Institute for Clinical Medical Research, University Hospital "Sestre Milosrdnice", Vinogradska 29, 10000 Zagreb, Croatia 86. Department of Chronic Disease Prevention, National Institute for Health and Welfare, Helsinki FIN-00300, Finland, 87. Diabetes Research Group, Institute of Cellular Medicine, Newcastle University, Framlington Place, Newcastle upon Tyne NE2 4HH, UK 88. Department of Preventive Medicine, Keck Medical School, University of Southern California, Los Angeles, CA, 90089-9001, USA 89. Division of Epidemiology and Community Health, University of Minnesota, Minneapolis, Minnesota 55454, USA 90. Department of Biomedical Science, Panum, Faculty of Health Science, University of Copenhagen, 2200 Copenhagen, Denmark 91. Faculty of Health Science, University of Aarhus, DK-8000 Aarhus, Denmark 92. Klinikum Grosshadern, 81377 Munich, Germany 93. Diabetes Unit, Massachusetts General Hospital, Boston, Massachusetts 02144, USA 94. Faculty of Medicine, University of Iceland, 101 Reykjavik, Iceland 95. Genomic Medicine, Imperial College London, Hammersmith Hospital, W12 0NN, London, UK 96. Oxford National Institute for Health Research Biomedical Research Centre, Churchill Hospital, Old Road Headington, Oxford, OX3 7LJ, UK

## **Acknowledgments**

### **AGES Reykjavik Study**

The Age, Gene/Environment Susceptibility Reykjavik Study has been funded by NIH contract N01-AG-12100, the NIA Intramural Research Program, Hjartavernd (the Icelandic Heart Association), and the Althingi (the Icelandic Parliament).

### **Amish**

The Amish studies are supported by grants and contracts from the NIH including R01 AG18728 (Amish Longevity Study), R01 HL088119 (Amish Calcification Study), U01 GM074518-04 (PAPI Study), U01 HL072515-06 (HAPI Study), U01 HL084756 and NIH K12RR023250 (University of Maryland MCRDP), NIH P30 DK072488 (Clinical Nutrition Research Unit of Maryland) and NIH P60 DK079637 (Baltimore Diabetes Research and Training Center). The University of Maryland General Clinical Research Center, grant M01 RR 16500 and the Baltimore Veterans Administration Medical Center Geriatrics Research and Education Clinical Center. We thank our Amish research volunteers for their long-standing partnership in research, and the research staff at the Amish Research Clinic for their hard work and dedication.

### **ARIC**

The Atherosclerosis Risk in Communities Study is carried out as a collaborative study supported by National Heart, Lung, and Blood Institute contracts (HHSN268201100005C, HHSN268201100006C, HHSN268201100007C, HHSN268201100008C, HHSN268201100009C, HHSN268201100010C, HHSN268201100011C, and HSN268201100012C), R01HL087641, R01HL59367 and R01HL086694; National Human Genome Research Institute contract U01HG004402; and National Institutes of Health contract HHSN268200625226C. AK and CH were supported by the Emmy Noether Programme of the German Research Foundation (KO3598/2-1). The authors thank the staff and participants of the ARIC study for their important contributions. Infrastructure was partly supported by Grant Number UL1RR025005, a component of the National Institutes of Health and NIH Roadmap for Medical Research.

### **ASPS**

The Austrian Stroke Prevention Study is funded by the Austrian Science Fond (FWF) grant number P20545-P05 and P13180. The Medical University of Graz supports the databank of the ASPS.

### **AUSTWIN**

We acknowledge the contributions of many staff in the Genetic Epidemiology Unit, Queensland Institute of Medical Research, in interviewing study participants, sample processing and DNA extraction, and data management. Funding for aspects of this work was provided by the Australian National Health and Medical Research Council (241944, 339462, 389927, 389875, 389891, 389892, 389938, 442915, 442981, 496739, 552485, 552498), the Australian Research

Council (A7960034, A79906588, A79801419, DP0770096, DP0212016, DP0343921), the EU 5th Framework Programme GenomEUtwin Project (QLG2-CT-2002-01254), and the U.S. National Institutes of Health (AA07535, AA10248, AA11998, AA13320, AA13321, AA13326, AA14041, AA17688, DA12854, MH66206 ). A portion of the genotyping on which this study was based was carried out at the Center for Inherited Disease Research, Baltimore (CIDR) (Illumina 370K scans on 4300 individuals), through an access award to our late colleague Dr. Richard Todd. Parts of the statistical analyses were carried out on the Genetic Cluster Computer, which is financially supported by the Netherlands Scientific Organization (I 480-05-003). R.P.S.M. and G.W.M. are supported by National Health and Medical Research Council (NHMRC) Fellowship Schemes.

#### **BioBank Japan Project**

We would like to thank all staff of the Laboratory for Statistical Analysis, Medical Informatics, and Genotyping Development at Center for Genomic Medicine, RIKEN and BioBank Japan Project for the supports for the study. BioBank Japan Project was supported by Ministry of Education, Culture, Sports, Science and Technology, Japan.

#### **BLSA**

The Baltimore Longitudinal Study of Aging was supported in part by the Intramural Research Program of the NIH, National Institute on Aging. A portion of that support was through a R&D contract with MedStar Research Institute.

#### **BRIGHT**

The BRIGHT study was supported by the Medical Research Council of Great Britain (G9521010D) and The Wellcome Trust as part of the Wellcome Trust Case Control Consortium. The BRIGHT study is extremely grateful to all the patients who participated in the study and the BRIGHT nursing team and we would also like to thank Charles Mein, Richard Dobson, Chris Wallace, Toby Johnson and the Barts and The London Genome Centre staff. This is part of the translational studies supported by the Barts and The London and the Leicester National Institute for Health Research Cardiovascular Biomedical Research Units. This work forms part of the CHAPTER e-health centre research program.

#### **CARDIA**

The Coronary Artery Risk Development in Young Adults (CARDIA) study is funded by contracts N01-HC-95095, N01-HC-48047, N01-HC-48048, N01-HC-48049, N01-HC-48050, N01-HC-45134, N01-HC-05187, N01-HC-45205, and N01-HC-45204 from the National Heart, Lung, and Blood Institute to the CARDIA investigators. Genotyping of the CARDIA participants was supported by grants U01-HG-004729, U01-HG-004446, and U01-HG-004424 from the National Human Genome Research Institute and R01-HL-084099 from the National Heart, Lung, and Blood Institute to MF.

## **CHS**

This CHS research was supported by NHLBI contracts HHSN268201200036C, N01-HC-85239, N01-HC-85079 through N01-HC-85086, N01-HC-35129, N01 HC-15103, N01 HC-55222, N01-HC-75150, N01-HC-45133 and NHLBI grants HL080295, HL087652, HL105756 with additional contribution from NINDS. Additional support was provided through AG-023629, AG-15928, AG-20098, and AG-027058 from the NIA. See also <http://www.chs-nhlbi.org/pi.htm>. DNA handling and genotyping was supported in part by National Center of Advancing Translational Technologies CTSI grant UL1TR000124 and National Institute of Diabetes and Digestive and Kidney Diseases grant DK063491 to the Southern California Diabetes Endocrinology Research Center.

## **CoLaus**

Cohorte Lausannoise (CoLaus) study received financial contributions from GlaxoSmithKline, the Faculty of Biology and Medicine of Lausanne, and the Swiss National Science Foundation (33CSCO-122661). The authors thank Dawn Waterworth and Vincent Mooser, Co-Pis of the CoLaus study. Special thanks to Sven Bergmann, Jacqui Beckmann, Yolande Barreau, Mathieu Firmann, Vladimir Mayor, Anne-Lise Bastian, Binasa Ramic, Martine Moranville, Martine Baumer, Marcy Sagette, Jeanne Ecoffey and Sylvie Mermoud for data collection.

## **CROATIA-KORCULA**

This research was funded by Grants from the Medical Research Council (UK) to Prof Alan Wright, from the Republic of Croatia Ministry of Science, Education and Sports to Prof Igor Rudan (108-1080315-0302) and a EU framework 6 project EUROSPAN (contract no LSHG-CT-2006-018947) to Prof Harry Campbell. We acknowledge Peter Lichtner and the Helmholtz Zentrum München genotyping staff (Munich, Germany) for the SNP genotyping. The support (to Prof Olivier Devuyst) of the Belgian agencies FNRS and FRSM (3.4.592.06F), the Programme d'excellence Marshall DIANE (Région Wallone), and the National Centre of Competence in Research (NCCR) Kidney as well as CH are gratefully acknowledged.

## **CROATIA-SPLIT**

This research was funded by Grants from the Medical Research Council (UK) to Prof Alan Wright, from the Republic of Croatia Ministry of Science, Education and Sports to Prof Igor Rudan (108-1080315-0302). The support (to Prof Olivier Devuyst) of the Belgian agencies FNRS and FRSM (3.4.592.06F), the Programme d'excellence Marshall DIANE (Région Wallone), the National Centre of Competence in Research (NCCR) Kidney as well as CH are gratefully acknowledged.

## **CROATIA-VIS**

This research was funded by Grants from the Medical Research Council (UK) to Prof Alan Wright and from the Republic of Croatia Ministry of Science, Education and Sports to Prof Igor Rudan (108-1080315-0302). We acknowledge Prof. Pavao Rudan, Dr. Nina Smolej-Narancic, Dr. Branka Janicijevic and their colleagues at the Institute for Anthropological Research 10000

Zagreb, Croatia for participants' recruitment and field work, the Wellcome Trust Clinical Research Facility (Edinburgh) for performing the initial SNP genotyping.

#### **DESIR**

The DESIR Study Group is composed of: INSERM U258: B. Balkau, P. Ducimetière, and E. Eschwège; INSERM U367: F. Alhenc-Gelas; CHU D'Angers: Y. Gallois and A. Girault; Bichat Hospital: F. Fumeron and M. Marre; Medical Examination Services: Alençon, Angers, Caen, Chateauroux, Cholet, Le Mans, and Tours; Research Institute for General Medicine: J. Cogneau; General practitioners of the region; Cross-Regional Institute for Health: C. Born, E. Caces, M. Cailleau, J.G. Moreau, F. Rakotozafy, J. Tichet, O. Lantieri, and S. Vol. The DESIR study has been supported by INSERM, CNAMTS, Lilly, Novartis Pharma and Sanofi- Aventis, by INSERM (Réseaux en Santé Publique, Interactions entre les déterminants de la santé), by the Association Diabète Risque Vasculaire, the Fédération Française de Cardiologie, La Fondation de France, ALFEDIAM, ONIVINS, Ardix Medical, Bayer Diagnostics, Becton Dickinson, Cardionics, Merck Santé, Novo Nordisk, Pierre Fabre, Roche, Topcon.

#### **EPIC-Norfolk cohort**

The European Prospective Investigation of Cancer (EPIC) Norfolk Study was supported by the British Heart Foundation, Cancer Research UK, the Department of Health, the Medical Research Council (MRC), and the Food Standards Agency. The EPIC Norfolk obesity study was funded by Cancer Research UK and the MRC.

#### **ERF**

The genotyping for the ERF study was supported by EUROSPAN (European Special Populations Research Network) and the European Commission FP6 STRP grant (018947; LSHG-CT-2006-01947). The ERF study was further supported by grants from the Netherlands Organisation for Scientific Research (Pionier, 047.016.009, 047.017.043), Erasmus MC, the Centre for Medical Systems Biology (CMSB; National Genomics Initiative) and the Netherlands Brain Foundation (HersenStichting Nederland). We are grateful to all participating individuals and their relatives, general practitioners and neurologists for their contributions and to P. Veraart for her help in genealogy, Jeannette Vergeer for the supervision of the laboratory work and P. Sniijders for his help in data collection.

#### **EGCUT**

EGCUT received financing by FP7 grants (ENGAGE 201413, OPENGENE 245536), targeted financing from Estonian Government SF0180142s08, Estonian Research Roadmap through Estonian Ministry of Education and Research (3.2.0304.11-0312), Center of Excellence in Genomics (EXCEGEN) and Development Fund of University of Tartu (SP1GVARENG). We acknowledge EGCUT personnel, especially Mr V. Soo. Data analyzes were carried out in part in the High Performance Computing Center of University of Tartu. MM was supported by CZ.2.16/3.1.00/24022. AS was funded by grant SF0180044s09 from the Estonian Ministry of Education and Research, and by Enterprise Estonia, grant no. EU30200.

**FamHS**

The Family Heart Study (FamHS) work was supported by NIH grants 5R01HL08770003, and 5R01HL08821502.

**FHS**

This research was conducted in part using data and resources from the Framingham Heart Study of the National Heart Lung and Blood Institute of the National Institutes of Health and Boston University School of Medicine. This work was partially supported by the National Heart, Lung and Blood Institute's Framingham Heart Study in collaboration with Boston University (Contract No. N01-HC-25195) and its contract with Affymetrix, Inc for genotyping services (Contract No. N02-HL-6-4278). A portion of this research utilized the Linux Cluster for Genetic Analysis (LinGA-II) funded by the Robert Dawson Evans Endowment of the Department of Medicine at Boston University School of Medicine and Boston Medical Center.

**GHS**

The Gutenberg Health study is funded through the government of Rheinland-Pfalz (No. AZ 961-386261/733), the research program "Wissen schafft Zukunft" and the "Schwerpunkt Vaskuläre Prävention" of the Johannes Gutenberg University of Mainz and its contract with Boehringer Ingelheim and PHILIPS medical systems, including an unrestricted grant for the Gutenberg Health Study. Further, this project has been supported by the National Genome Network "NGFNplus" by the federal Ministry of Education and Research, Germany (No. 01GS0833 and 01GS0831, projects A3/D1).

**GSK**

Funding Source: Max-Planck Society, Genotype data were provided by GSK.

**HCS**

This study was funded by the University of Newcastle, the Gladys M Brawn Fellowship scheme and the Vincent Fairfax Family Foundation in Australia.

**Health 2000**

The Health 2000 Study is funded by the National Institute for Health and Welfare (THL), the Finnish Centre for Pensions (ETK), The Social Insurance Institution of Finland (KELA), The Local Government Pensions Institution (KEVA) and other organizations listed on the website of the survey (<http://www.terveys2000.fi>). GWAS genotyping was supported by the Wellcome Trust Sanger Institute. Dr. Salomaa was supported by the Academy of Finland (grants # 129494 and 139635).

**Hercules Study**

The phenotypic part of the Hercules study, a substudy of CoLaus, was supported by the Nephrology Division and the Institute of Social and Preventive Medicine, CHUV, Lausanne, Switzerland. The genotyping was done within the framework of the CoLaus Study. The CoLaus

study received financial contributions from GlaxoSmithKline, the Faculty of Biology and Medicine of Lausanne, and the Swiss National Science Foundation (33CSCO-122661).

#### **HPFS/NHS**

The project described was supported by Grant Number R01AR056291 from NIAMS/NIH. This research was also supported in part by grants R21AR056042 and P60AR047785 from NIAMS/NIH and P01CA087969 from NIH/NCI.

#### **HYPEST**

The recruitment to the HYPEST study was supported by Wellcome Trust International Senior Research Fellowships (grant no. 070191/Z/03/Z and 070191/Z/03/A to ML) in Biomedical Science in Central Europe. The investigators have been supported by Estonian Ministry of Education and Science core grant no. 0182721s06, Estonian Science Foundation grants no ETF7471 (to ML) and no ETF7491 (to EO) and the European Union European Regional Development Fund (to MV).

#### **InCHIANTI**

The InCHIANTI study baseline (1998-2000) was supported as a “targeted project” (ICS110.1/RF97.71) by the Italian Ministry of Health and in part by the U.S. National Institute on Aging (Contracts: 263 MD 9164 and 263 MD 821336).

#### **INCIPE**

The INCIPE study was co-sponsored by Fondazione Cassa di Risparmio di Verona, Azienda Ospedaliera di Verona, and University of Verona.

#### **INGI-CILENTO**

We thank the populations of Cilento for their participation in the study. This work was supported by grants from the EU (Vasoplus-037254), the Italian Ministry of Universities (FIRB – RBIN064YAT), the Assessorato Ricerca Regione Campania, the Ente Parco Nazionale del Cilento e Vallo di Diano and the Fondazione Banco di Napoli to MC.

#### **INGI-Carlintino and INGI-FVG**

The study was funded Regione FVG (L.26.2008). We thank Laura Esposito and Angela D’Eustacchio for technical support. We are very grateful to the municipal administrators for their collaboration on the project and for logistic support. We would like to thank all participants to this study.

#### **INGI-Val Borbera**

The research was done thanks to funds from Compagnia di San Paolo, Torino, Italy, Cariplo Foundation, Milano, Italy and Italian Ministry of Health Progetto Finalizzato 2007 and 2009. We acknowledge the participants to the study and the collaboration of the local administrators and of the ASL-AI, Novi Ligure (AI). We also acknowledge the support of Prof. Clara Camaschella and Federico Caligaris-Cappio (U.Vita e Salute-HSR) for clinical data collection.



## **JHS**

The Jackson Heart Study (JHS) was funded by the Jackson State University (N01-HC-95170), the University of Mississippi (N01-HC-95171), and Tougaloo College (N01-HC-95172).

## **KORA**

The KORA Augsburg studies were financed by the Helmholtz Zentrum München, German Research Center for Environmental Health, Neuherberg, Germany and supported by grants from the German Federal Ministry of Education and Research (BMBF). Part of this work was financed by the German National Genome Research Network (NGFN). Our research was supported within the Munich Center of Health Sciences (MC Health) as part of LMUinnovativ. This work was also funded by the European Research Council (starting grant 'LatentCauses'), by BMBF Grant no. 0315494A (project SysMBo), by the Initiative and Networking Fund of the Helmholtz Association within the Helmholtz Alliance on Systems Biology (project CoReNe). Jan Krumsiek is supported by a PhD student fellowship from the "Studienstiftung des Deutschen Volkes".

## **LBC1936**

We thank the LBC1936 participants. We thank Janie Corley, Caroline Brett, Caroline Cameron, Michelle Taylor, Catherine Murray, Ross Henderson, and Alison Pattie for data collection and data entry. We thank the study secretary Paula Davies. We thank the nurses and staff at the Wellcome Trust Clinical Research Facility, where subjects were tested and the genotyping was performed. We thank the staff at the Lothian Health Board, and the staff at the SCRE Centre, University of Glasgow. The whole genome association study was funded by the Biotechnology and Biological Sciences Research Council (BBSRC) (Ref. BB/F019394/1). The LBC1936 data collection was funded by Research Into Ageing (Ref. 251). The work was undertaken by The University of Edinburgh Centre for Cognitive Ageing and Cognitive Epidemiology, part of the cross council Lifelong Health and Wellbeing Initiative (Ref. G0700704/84698). Funding from the BBSRC, Engineering and Physical Sciences Research Council (EPSRC), Economic and Social Research Council (ESRC) and Medical Research Council (MRC) is gratefully acknowledged.

## **LifeLines**

The LifeLines Cohort Study, and generation and management of GWAS genotype data for the LifeLines Cohort Study is supported by the Netherlands Organization of Scientific Research NWO (grant 175.010.2007.006), the Economic Structure Enhancing Fund (FES) of the Dutch government, the Ministry of Economic Affairs, the Ministry of Education, Culture and Science, the Ministry for Health, Welfare and Sports, the Northern Netherlands Collaboration of Provinces (SNN), the Province of Groningen, University Medical Center Groningen, the University of Groningen, Dutch Kidney Foundation and Dutch Diabetes Research Foundation. We thank Behrooz Alizadeh, Annemieke Boesjes, Marcel Bruinenberg, Noortje Festen, Ilja Nolte, Lude Franke, Mitra Valimohammadi for their help in creating the GWAS database, and Rob Bieringa, Joost Keers, René Oostergero, Rosalie Visser, Judith Vonk for their work related to data-collection and validation. The authors are grateful to the study participants, the staff from the LifeLines

Cohort Study and Medical Biobank Northern Netherlands, and the participating general practitioners and pharmacists. LifeLines Scientific Protocol Preparation: Rudolf de Boer, Hans Hillege, Melanie van der Klauw, Gerjan Navis, Hans Ormel, Dirkje Postma, Judith Rosmalen, Joris Slaets, Ronald Stolk, Bruce Wolffenbuttel; LifeLines GWAS Working Group: Behrooz Alizadeh, Marika Boezen, Marcel Bruinenberg, Noortje Festen, Lude Franke, Pim van der Harst, Gerjan Navis, Dirkje Postma, Harold Snieder, Cisca Wijmenga, Bruce Wolffenbuttel.

#### **LOLIPOP**

The LOLIPOP study was supported by the Wellcome Trust and the British Heart Foundation Grant SP/04/002. We thank the participants and research teams involved in LOLIPOP. We thank GSK for supporting and genotyping of the data.

#### **LURIC**

LURIC has received funding from the Deutsche Forschungsgemeinschaft (GRK 1041 and SFB 518) and through the 6th Framework Program (integrated project Bloodomics, grant LSHM-CT-2004-503485) and 7th of Framework Program (integrated project Atheroremo, Grant Agreement number 201668) of the European Union. We thank the LURIC team involved in patient recruitment and sample and data handling and the laboratory staffs at the Ludwigshafen General Hospital, the Universities of Freiburg, Ulm, and Graz.

#### **MARS**

Funding Source: Max-Planck Society, German Federal Ministry for Education and Research (BMBF) in the framework of the National Genome Research Network (NGFN2 and NGFN-Plus, FKZ 01GS0481).

#### **MICROS**

For the MICROS study, we thank the primary care practitioners Raffaella Stocker, Stefan Waldner, Toni Pizzocco, Josef Plangger, Ugo Marcadent, and the personnel of the Hospital of Silandro (Department of Laboratory Medicine) for their participation and collaboration in the research project. In South Tyrol, the study was supported by the Ministry of Health and Department of Educational Assistance, University and Research of the Autonomous Province of Bolzano, and the South Tyrolean Sparkasse Foundation.

#### **NESDA**

The infrastructure for the Netherlands Study of Depression and Anxiety (NESDA) is funded through the Geestkracht programme of the Dutch Scientific Organization (ZON-MW, grant number 10-000-1002) and matching funds from participating universities and mental health care organizations. Genotyping in NESDA was funded by the Genetic Association Information Network (GAIN) of the Foundation for the US National Institutes of Health. Statistical analyses were carried out on the Genetic Cluster Computer (<http://www.geneticcluster.org>), which is financially supported by the Netherlands Scientific Organization (NWO 480-05-003) along with a supplement from the Dutch Brain Foundation.

## **NSPHS**

The Northern Swedish Population Health Study (NSPHS) was funded by the Swedish Medical Research Council (project number K2007-66X-20270-01-3), and the Foundation for Strategic Research (SSF). The NSPHS as part of EUROSPAN (European Special Populations Research Network) was also supported by European Commission FP6 STRP grant number 01947 (LSHG-CT-2006-01947). This work was also supported by the Swedish Society for Medical Research (Åsa Johansson). The authors are grateful for the contribution of district nurse Svea Hennix for data collection and Inger Jonasson for logistics and coordination of the health survey. Finally, the authors thank all the community participants for their interest and willingness to contribute to the study.

## **Ogliastra Genetic Park**

We thank the Ogliastra population and all the individuals who participated in this study. We are very grateful to the municipal administrators for their collaboration to the project and for economic and logistic support. This work was supported by grants from the Italian Ministry of Education, University and Research (MIUR) no.5571/DSPAR/2002 and (FIRB) D. M. no. 718/Ric/2005.

## **ORCADES**

ORCADES was supported by the Chief Scientist Office of the Scottish Government, the Royal Society, the Medical Research Council Human Genetics Unit and the European Union framework program 6 EUROSPAN project (contract no. LSHG-CT-2006-018947). DNA extractions were performed at the Wellcome Trust Clinical Research Facility in Edinburgh. We would like to acknowledge the invaluable contributions of Lorraine Anderson and the research nurses in Orkney, the administrative team in Edinburgh and the people of Orkney.

## **PREVEND**

PREVEND genetics is supported by the Dutch Kidney Foundation (Grant E033), The Netherlands Heart Foundation (Grant 2006B140, 2006T003), National Institutes of Health (grant LM010098, HL65234, HL67466, RR018787) and the EU project grant GENECURE (FP-6 LSHM CT 2006 037697). P.v.d.H is supported by I VENI grant 91676170 and Dutch Inter University Cardiology Institute Netherlands (ICIN).

## **PROCARDIS**

The Procardis consortium was funded by EC Sixth Framework Programme (LSHM-CT- 2007-037273) and Aztrazeneca AB. We acknowledge support from the Wellcome Trust core grant award 075491/Z/04.

## **RS-I, RS-II**

The GWA study was funded by the Netherlands Organisation of Scientific Research NWO Investments (nr. 175.010.2005.011, 911-03-012), the Research Institute for Diseases in the Elderly (014-93-015; RIDE2), the Netherlands Genomics Initiative (NGI)/Netherlands Consortium for Healthy Aging (NCHA) project nr. 050-060-810. We thank Pascal Arp, Mila

Jhamai, Dr Michael Moorhouse, Marijn Verkerk, and Sander Bervoets for their help in creating the GWAS database. The Rotterdam Study is funded by Erasmus Medical Center and Erasmus University, Rotterdam, Netherlands Organization for the Health Research and Development (ZonMw), the Research Institute for Diseases in the Elderly (RIDE), the Ministry of Education, Culture and Science, the Ministry for Health, Welfare and Sports, the European Commission (DG XII), and the Municipality of Rotterdam. The authors are very grateful to the participants and staff from the Rotterdam Study, the participating general practitioners and the pharmacists. We would like to thank Dr. Tobias A. Knoch, Luc V. de Zeeuw, Anis Abuseiris, and Rob de Graaf as well as their institutions the Erasmus Computing Grid, Rotterdam, The Netherlands, and especially the national German MediGRID and Services@MediGRID part of the German D-Grid, both funded by the German Bundesministerium für Forschung und Technology under grants #01 AK 803 A-H and # 01 IG 07015 G, for access to their grid resources. Abbas Dehghan is supported by NWO grant (vici, 918-76-619) and the EUR Fellowship. The Netherlands Consortium for Healthy Aging (NCHA) was sponsored by the Netherlands Genomics Initiative (NGI, A. Dehghan, A. Hofman, F. Rivadeneira, A.G. Uitterlinden, and J.C.M. Witteman).

#### **SAPALDIA**

SAPALDIA is supported by the Swiss National Science Foundation (grants no, 3247BO-104283, 3247BO-104288, 3247BO-104284, 3247-065896, 3100-059302, 3200-052720, 3200-042532, 4026-028099, 3233-054996, PDFMP3-123171), the Federal Office for Forest, Environment and Landscape, the Federal Office of Public Health, the Federal Office of Roads and Transport, the canton's government of Aargau, Basel-Stadt, Basel-Land, Geneva, Luzern, Ticino, Zurich, the Swiss Lung League, the canton's Lung League of Basel Stadt/ Basel Landschaft, Geneva, Ticino and Zurich, SUVA, Freiwillige Akademische Gesellschaft, UBS Wealth Foundation, Talecris Biotherapeutics GmbH, Abbott Diagnostics, European Commission 018996 (GABRIEL), Wellcome Trust WT 084703MA.

#### **SardiNIA**

The SardiNIA ("Progenia") team was supported by Contract NO1-AG-1-2109 from the NIA. We thank the many individuals who generously participated in this study, the Mayors and citizens of the Sardinian towns involved and the head of the Public Health Unit ASL4, the province of Ogliastra for their volunteerism and cooperation. In addition, we are grateful to the Mayor and the administration in Lanusei for providing and furnishing the clinic site. We also thank the HPC group from the CRS4 center in Pula, for IT support and access to the computing cluster.

#### **SHIP, SHIP-Trend**

The Study of Health in Pomerania (SHIP) is part of the Community Medicine Research net of the University of Greifswald, Germany, which is funded by the Federal Ministry of Education and Research (grants no. 01ZZ9603, 01ZZ0103, and 01ZZ0403), the Deutsche Forschungsgemeinschaft (grant DFG GRK840-D2), the Ministry of Cultural Affairs as well as the Social Ministry of the Federal State of Mecklenburg-West Pomerania, and the network

'Greifswald Approach to Individualized Medicine (GANI\_MED)' funded by the Federal Ministry of Education and Research (grant 03IS2061A). Genome-wide data have been supported by the Federal Ministry of Education and Research (grant no. 03ZIK012) and a joint grant from Siemens Healthcare, Erlangen, Germany and the Federal State of Mecklenburg- West Pomerania. The University of Greifswald is a member of the 'Center of Knowledge Interchange' program of the Siemens AG and the Caché Campus program of the InterSystems GmbH. The SHIP authors are grateful to Mario Stanke for the opportunity to use his Server Cluster for SNP Imputation as well as to Holger Prokisch and Thomas Meitinger (Helmholtz Zentrum München) for the genotyping of the SHIP-TREND cohort.

#### **SOCCS**

The work was funded by the following grants: Cancer Research UK (C348/A12076, C348/A6361), Medical Research Council (G0000657-53203) and a Centre Grant from CORE as part of the Digestive Cancer Campaign.

#### **Sorbs**

Financial support was received from the German Research Council (KFO-152), IZKF (B27) and the German Diabetes Association. We would like to thank Knut Krohn (Microarray Core Facility of the Interdisciplinary Centre for Clinical Research, University of Leipzig) for the genotyping/analytical support and Joachim Thuery (Institute of Laboratory Medicine, Clinical Chemistry and Molecular Diagnostics, University of Leipzig) for clinical chemistry services. We thank Nigel W. Rayner (WTCHG, University of Oxford, UK) for the excellent bioinformatics support. Dr. Inga Prokopenko and Dr. Vasiliki Lagou were partial funded through the European Community's Seventh Framework Programme (FP7/2007-2013), ENGAGE project, grant agreement HEALTH-F4-2007-201413.

#### **TwinsUK**

The study was funded by the Wellcome Trust, European Community's Seventh Framework Programme (FP7/2007-2013)/grant agreement HEALTH-F2-2008-201865-GEFOS and (FP7/2007-2013), ENGAGE project grant agreement HEALTH-F4-2007-201413 and the FP-5 GenomEUtwin Project (QLG2-CT-2002-01254). The study also receives support from the Dept of Health via the National Institute for Health Research (NIHR) comprehensive Biomedical Research Centre award to Guy's & St Thomas' NHS Foundation Trust in partnership with King's College London. TDS is an NIHR senior Investigator. The project also received support from a Biotechnology and Biological Sciences Research Council (BBSRC) project grant. (G20234). The authors acknowledge the funding and support of the National Eye Institute via an NIH/CIDR genotyping project (PI: Terri Young). We thank the staff from the Genotyping Facilities at the Wellcome Trust Sanger Institute for sample preparation, Quality Control and Genotyping led by Leena Peltonen and Panos Deloukas; Le Centre National de Génotypage, France, led by Mark Lathrop, for genotyping, Duke University, North Carolina, USA, led by David Goldstein, for genotyping, and the Finnish Institute of Molecular Medicine, Finnish Genome Center, University

of Helsinki, led by Aarno Palotie. Genotyping was also performed by CIDR as part of an NEI/NIH project grant.

### **WGHS**

The Women's Genome Health Study (WGHS) is supported by HL 043851 and HL69757 from the National Heart, Lung, and Blood Institute and CA 047988 from the National Cancer Institute, the Donald W. Reynolds Foundation and the Fondation Leducq, with collaborative scientific support and funding for genotyping provided by Amgen.

### **Young Finns Study**

The Young Finns Study has been financially supported by the Academy of Finland (grants no. 117797, 126925, 121584, 117941), the Social Insurance Institution of Finland, the Turku University Foundation, the Finnish Cultural Foundation, the Yrjö Jahnsson Foundation, the Emil Aaltonen Foundation (T.L.), Medical Research Fund of Tampere University Hospital, Turku University Central Hospital Medical Fund, the Juho Vainio Foundation, and the Finnish Foundation for Cardiovascular Research and Tampere Tuberculosis Foundation.

### **ISGS/SWISS and BRAINS studies of stroke**

This work used samples and clinical data from the NINDS Human Genetics Resource Center DNA and Cell Line Repository (<http://ccr.coriell.org/ninds>), human subjects protocol numbers 2003-081 and 2004-147. This study utilized the high-performance computational capabilities of the Biowulf Linux cluster at the National Institutes of Health, Bethesda, MD (<http://biowulf.nih.gov>). SWISS, ISGS, and BRAINS were supported by non-industry grants. SWISS (NS39987) and ISGS (NS42733) were funded by the National Institutes of Health. BRAINS was supported by a Department of Health (UK) senior fellowship to PS and also by grants from the Henry Smith Charity and the British Council (UK-India Education Research Initiative, UKIERI). The funders had no role in study design, data collection and analysis, decision to publish, or preparation of the manuscript. This work was supported in part by the Intramural Research Program of the National Institute on Aging, National Institutes of Health, Department of Health and Human Services; project number Z01 AG000954-06.

### **MAGIC CONSORTIUM**

Data on glycaemic traits have been contributed by MAGIC investigators and have been downloaded from [www.magicinvestigators.org](http://www.magicinvestigators.org).

## References

1. Pruim, R.J. et al. LocusZoom: regional visualization of genome-wide association scan results. *Bioinformatics* 26, 2336-7 (2010).
2. Harris, T.B. et al. Age, Gene/Environment Susceptibility-Reykjavik Study: multidisciplinary applied phenomics. *American journal of epidemiology* 165, 1076-87 (2007).
3. Mitchell, B.D. et al. The genetic response to short-term interventions affecting cardiovascular function: rationale and design of the Heredity and Phenotype Intervention (HAPI) Heart Study. *American heart journal* 155, 823-8 (2008).
4. McArdle, P.F. et al. Association of a common nonsynonymous variant in GLUT9 with serum uric acid levels in old order amish. *Arthritis and rheumatism* 58, 2874-81 (2008).
5. The Atherosclerosis Risk in Communities (ARIC) Study: design and objectives. The ARIC investigators. *American journal of epidemiology* 129, 687-702 (1989).
6. Iribarren, C., Folsom, A.R., Eckfeldt, J.H., McGovern, P.G. & Nieto, F.J. Correlates of uric acid and its association with asymptomatic carotid atherosclerosis: the ARIC Study. *Atherosclerosis Risk in Communities. Annals of epidemiology* 6, 331-40 (1996).
7. Eckfeldt, J.H., Chambless, L.E. & Shen, Y.L. Short-term, within-person variability in clinical chemistry test results. Experience from the Atherosclerosis Risk in Communities Study. *Archives of pathology & laboratory medicine* 118, 496-500 (1994).
8. Schmidt, R. et al. Assessment of cerebrovascular risk profiles in healthy persons: definition of research goals and the Austrian Stroke Prevention Study (ASPS). *Neuroepidemiology* 13, 308-13 (1994).
9. Whitfield, J.B., Zhu, G., Nestler, J.E., Heath, A.C. & Martin, N.G. Genetic covariation between serum gamma-glutamyltransferase activity and cardiovascular risk factors. *Clinical chemistry* 48, 1426-31 (2002).
10. Middelberg, R.P., Medland, S.E., Martin, N.G. & Whitfield, J.B. A longitudinal genetic study of uric acid and liver enzymes in adolescent twins. *Twin research and human genetics : the official journal of the International Society for Twin Studies* 10, 757-64 (2007).
11. Benjamin, B. et al. Common variants in TM6SF2 are associated with iron status and erythrocyte volume. *Nature genetics* 41, 1173-5 (2009).
12. Shock, N.W. et al. Normal Human Aging: The Baltimore Study of Aging. U. S. Department of Health and Human Services (1984).
13. Caulfield, M. et al. Genome-wide mapping of human loci for essential hypertension. *Lancet* 361, 2118-23 (2003).
14. Friedman, G.D. et al. CARDIA: study design, recruitment, and some characteristics of the examined subjects. *Journal of clinical epidemiology* 41, 1105-16 (1988).
15. Fried, L.P. et al. The Cardiovascular Health Study: design and rationale. *Annals of epidemiology* 1, 263-76 (1991).
16. Firmann, M. et al. The CoLaus study: a population-based study to investigate the epidemiology and genetic determinants of cardiovascular risk factors and metabolic syndrome. *BMC cardiovascular disorders* 8, 6 (2008).
17. Zemunik, T. et al. Genome-wide association study of biochemical traits in Korcula Island, Croatia. *Croat Med J* 50, 23-33 (2009).
18. Rudan, I. et al. "10001 Dalmatians:" Croatia launches its national biobank. *Croat Med J* 50, 4-6 (2009).
19. Vrtart, V. et al. 3000 years of solitude: extreme differentiation in the island isolates of Dalmatia, Croatia. *Eur J Hum Genet* 14, 478-87 (2006).

20. Balkau, B., Eschwege, E., Tichet, J & Marre, M. Proposed criteria for the diagnosis of diabetes: evidence from a French epidemiological study (D.E.S.I.R.). *Diabetes & metabolism* 23, 428-34 (1997).
21. Vernay, M. et al. Alcohol consumption and insulin resistance syndrome parameters: associations and evolutions in a longitudinal analysis of the French DESIR cohort. *Annals of epidemiology* 14, 209-14 (2004).
22. Day, N. et al. EPIC-Norfolk: study design and characteristics of the cohort. *European Prospective Investigation of Cancer. British journal of cancer* 80 Suppl 1, 95-103 (1999).
23. Pardo, L.M., MacKay, I., Oostra, B., van Duijn, C.M. & Aulchenko, Y.S. The effect of genetic drift in a young genetically isolated population. *Annals of human genetics* 69, 288-95 (2005).
24. Nelis, M. et al. Genetic structure of Europeans: a view from the North-East. *PLoS one* 4, e5472 (2009).
25. Metspalu, A., Kohler, F., Laschinski, G., Ganten, D. & Roots, I. [The Estonian Genome Project in the context of European genome research]. *Deutsche medizinische Wochenschrift* 129 Suppl 1, S25-8 (2004).
26. Higgins, M. et al. NHLBI Family Heart Study: objectives and design. *American journal of epidemiology* 143, 1219-28 (1996).
27. Neogi, T., Terkeltaub, R., Ellison, R.C., Hunt, S & Zhang, Y. Serum Urate Is Not Associated with Coronary Artery Calcification: The NHLBI Family Heart Study. *The Journal of rheumatology* 38, 111-7 (2011).
28. Neogi, T. et al. Serum uric acid is associated with carotid plaques: the National Heart, Lung, and Blood Institute Family Heart Study. *The Journal of rheumatology* 36, 378-84 (2009).
29. Tang, W. et al. Familial clustering for features of the metabolic syndrome: the National Heart, Lung, and Blood Institute (NHLBI) Family Heart Study. *Diabetes care* 29, 631-6 (2006).
30. Tang, W. et al. Linkage analysis of a composite factor for the multiple metabolic syndrome: the National Heart, Lung, and Blood Institute Family Heart Study. *Diabetes* 52, 2840-7 (2003).
31. Wilk, J.B. et al. Segregation analysis of serum uric acid in the NHLBI Family Heart Study. *Human genetics* 106, 355-9 (2000).
32. Dawber, T.R., Kannel, W.B. & Lyell, L.P. An approach to longitudinal studies in a community: the Framingham Study. *Annals of the New York Academy of Sciences* 107, 539-56 (1963).
33. Crowley, L.V. Determination of Uric Acid: An Automated Analysis Based on a Carbonate Method. *Clinical chemistry* 10, 838-44 (1964).
34. Ferrucci, L. et al. Subsystems contributing to the decline in ability to walk: bridging the gap between epidemiology and geriatric practice in the InCHIANTI study. *Journal of the American Geriatrics Society* 48, 1618-25 (2000).
35. Gambaro, G. et al. Prevalence of CKD in northeastern Italy: results of the INCIFE study and comparison with NHANES. *Clinical journal of the American Society of Nephrology : CJASN* 5, 1946-53 (2010).
36. Tepper, B.J. et al. Variation in the bitter-taste receptor gene TAS2R38, and adiposity in a genetically isolated population in Southern Italy. *Obesity* 16, 2289-95 (2008).
37. Gullo, M. et al. New susceptibility locus for hypertension on chromosome 8q by efficient pedigree-breaking in an Italian isolate. *Human molecular genetics* 15, 1735-43 (2006).
38. Colonna, V. et al. Campora: a young genetic isolate in South Italy. *Human heredity* 64, 123-35 (2007).
39. Gullo, M. et al. Identification and replication of a novel obesity locus on chromosome 1q24 in isolated populations of Gfento. *Diabetes* 57, 783-90 (2008).
40. Sala, C. et al. Variation of hemoglobin levels in normal Italian populations from genetic isolates. *Haematologica* 93, 1372-5 (2008).



41. Traglia, M. et al. Heritability and demographic analyses in the large isolated population of Val Borbera suggest advantages in mapping complex traits genes. *PLoSone* 4, e7554 (2009).
42. Heid, I.M. et al. Meta-analysis of the INSG2 association with obesity including 74,345 individuals: does heterogeneity of estimates relate to study design? *PLoSgenetics* 5, e1000694 (2009).
43. Colonna, V. et al. Comparing population structure as inferred from genealogical versus genetic information. *European journal of human genetics : EHG* 17, 1635-41 (2009).
44. Bedin, E. et al. Age-related hearing loss in four Italian genetic isolates: an epidemiological study. *International journal of audiology* 48, 465-72 (2009).
45. Servo, M. et al. Angiogenesis and biomarkers of cardiovascular risk in adults with metabolic syndrome. *Journal of internal medicine* 268, 338-47 (2010).
46. Grotto, G. et al. Hearing function and thresholds: a genome-wide association study in European isolated populations identifies new loci and pathways. *Journal of medical genetics* 48, 369-74 (2011).
47. Wichmann, H.E., Gieger, C. & Illig, T. KORA-gen—resource for population genetics, controls and a broad spectrum of disease phenotypes. *Gesundheitswesen* 67 Suppl 1, S26-30 (2005).
48. Deary, I.J. et al. The Lothian Birth Cohort 1936: a study to examine influences on cognitive ageing from age 11 to age 70 and beyond. *BMCgeriatrics* 7, 28 (2007).
49. Houlihan, L.M. et al. Common variants of large effect in F12, KNG1, and HRG are associated with activated partial thromboplastin time. *American journal of human genetics* 86, 626-31 (2010).
50. Stolck, R.P. et al. Universal risk factors for multifactorial diseases: LifeLines: a three-generation population-based study. *European journal of epidemiology* 23, 67-74 (2008).
51. Yuan, X. et al. Population-based genome-wide association studies reveal six loci influencing plasma levels of liver enzymes. *American journal of human genetics* 83, 520-8 (2008).
52. Kooner, J.S. et al. Genome-wide scan identifies variation in MLXIP associated with plasma triglycerides. *Nature genetics* 40, 149-51 (2008).
53. Winkelmann, B.R. et al. Rationale and design of the LURIC study—a resource for functional genomics, pharmacogenomics and long-term prognosis of cardiovascular disease. *Pharmacogenomics* 2, S1-73 (2001).
54. Pattaro, C. et al. The genetic study of three population microisolates in South Tyrol (MICROS): study design and epidemiological perspectives. *BMC Med Genet* 8, 29 (2007).
55. Penninx, B.W. et al. The Netherlands Study of Depression and Anxiety (NESDA): rationale, objectives and methods. *International journal of methods in psychiatric research* 17, 121-40 (2008).
56. Sullivan, P.F. et al. Genome-wide association for major depressive disorder: a possible role for the presynaptic protein piccolo. *Molecular psychiatry* 14, 359-75 (2009).
57. Igl, W., Johansson, A. & Gyllenstein, U. The Northern Swedish Population Health Study (NSPHS)—a paradigmatic study in a rural population combining community health and basic research. *Rural Remote Health* 10, 1363 (2010).
58. McQuillan, R. et al. Runs of homozygosity in European populations. *Am J Hum Genet* 83, 359-72 (2008).
59. Hillege, H.L. et al. Urinary albumin excretion predicts cardiovascular and noncardiovascular mortality in general population. *Circulation* 106, 1777-82 (2002).
60. Mostert, J.P. et al. Serum uric acid levels and leukocyte nitric oxide production in multiple sclerosis patients outside relapses. *Journal of the neurological sciences* 231, 41-4 (2005).
61. Broadbent, H.M. et al. Susceptibility to coronary artery disease and diabetes is encoded by distinct, tightly linked SNPs in the ANRL locus on chromosome 9p. *Human molecular genetics* 17, 806-14 (2008).

62. Hofman, A., Grobbee, D.E., de Jong, P.T. & van den Ouweland, F.A. Determinants of disease and disability in the elderly: the Rotterdam Elderly Study. *European journal of epidemiology* 7, 403-22 (1991).
63. Hofman, A. et al. The Rotterdam Study: 2010 objectives and design update. *European journal of epidemiology* 24, 553-72 (2009).
64. Flia, G. et al. Heritability of cardiovascular and personality traits in 6,148 Sardinians. *PLoS genetics* 2, e132 (2006).
65. Li, S. et al. The GLUT9 gene is associated with serum uric acid levels in Sardinia and Chianti cohorts. *PLoS genetics* 3, e194 (2007).
66. Sanna, S. et al. Common variants in the GDF5-UQC region are associated with variation in human height. *Nature genetics* 40, 198-203 (2008).
67. John, U. et al. Study of Health In Pomerania (SHIP): a health examination survey in an east German region: objectives and design. *Sozial- und Präventivmedizin* 46, 186-94 (2001).
68. Volzke, H. et al. Cohort Profile: The Study of Health in Pomerania. *International journal of epidemiology* 40, 294-307 (2011).
69. Tenesa, A. et al. Genome-wide association scan identifies a colorectal cancer susceptibility locus on 11q23 and replicates risk loci at 8q24 and 18q21. *Nat Genet* 40, 631-7 (2008).
70. Tonjes, A. et al. Genetic variation in GPR133 is associated with height: genome wide association study in the self-contained population of Sorbs. *Human molecular genetics* 18, 4662-8 (2009).
71. Tonjes, A. et al. Association of FTO variants with BMI and fat mass in the self-contained population of Sorbs in Germany. *European journal of human genetics: EJHG* 18, 104-10 (2010).
72. Veeramah, K.R. et al. Genetic variation in the Sorbs of eastern Germany in the context of broader European genetic diversity. *Eur J Hum Genet* 19, 995-1001 (2011).
73. Moayyeri, A., Hammond, C.J., Valdes, A.M. & Spector, T.D. Cohort Profile: TwinsUK and Healthy Ageing Twin Study. *International journal of epidemiology* (2012).
74. Ridker, P.M. et al. Rationale, design, and methodology of the Women's Genome Health Study: a genome-wide association study of more than 25,000 initially healthy American women. *Clinical chemistry* 54, 249-55 (2008).
75. Raitakari, O.T. et al. Cohort profile: the cardiovascular risk in Young Finns Study. *International journal of epidemiology* 37, 1220-6 (2008).
76. Lucae, S. et al. P2RX7, a gene coding for a purinergic ligand-gated ion channel, is associated with major depressive disorder. *Hum Mol Genet* 15, 2438-45 (2006).
77. Kloiber, S. et al. Variations in tryptophan hydroxylase 2 linked to decreased serotonergic activity are associated with elevated risk for metabolic syndrome in depression. *Mol Psychiatry* 15, 736-47 (2010).
78. Kohli, M.A. et al. The neuronal transporter gene SLC6A15 confers risk to major depression. *Neuron* 70, 252-65 (2011).
79. Zeller, T. et al. Genetics and beyond—the transcriptome of human monocytes and disease susceptibility. *PLoSOne* 5, e10693 (2010).
80. Wild, P.S. et al. Distribution and categorization of left ventricular measurements in the general population: results from the population-based Gutenberg Heart Study. *Circulation. Cardiovascular imaging* 3, 604-13 (2010).
81. Wild, P.S. et al. A genome-wide association study identifies LIPA as a susceptibility gene for coronary artery disease. *Circulation. Cardiovascular genetics* 4, 403-12 (2011).
82. McEvoy, M. et al. Cohort profile: The Hunter Community Study. *International journal of epidemiology* 39, 1452-63 (2010).
83. Portas, L. et al. History, geography and population structure influence the distribution and heritability of blood and anthropometric quantitative traits in nine Sardinian genetic isolates. *Genetics research* 92, 199-208 (2010).

84. Biino, G. et al. Genetic architecture of hand quantitative ultrasound measures: a population-based study in a Sardinian genetic isolate. *Bone* 46, 1197-203 (2010).
85. Tore, S. et al. Application of a new method for GWAS in a related case/control sample with known pedigree structure: identification of new loci for nephrolithiasis. *PLoS genetics* 7, e1001281 (2011).
86. Martin, B.W. et al. SAPALDIA: methods and participation in the cross-sectional part of the Swiss Study on Air Pollution and Lung Diseases in Adults. *Sozial- und Präventivmedizin* 42, 67-84 (1997).
87. Ackermann-Lieblich, U. et al. Follow-up of the Swiss Cohort Study on Air Pollution and Lung Diseases in Adults (SAPALDIA 2) 1991-2003: methods and characterization of participants. *Sozial- und Präventivmedizin* 50, 245-63 (2005).
88. Org, E. et al. HYPREST study: profile of hypertensive patients in Estonia. *BMC cardiovascular disorders* 11, 55 (2011).
89. Org, E. et al. Genome-wide scan identifies CDH13 as a novel susceptibility locus contributing to blood pressure determination in two European populations. *Hum Mol Genet* 18, 2288-96 (2009).
90. Juhanson, P. et al. N-acetyltransferase 8, a positional candidate for blood pressure and renal regulation: resequencing, association and in silico study. *BMC Med Genet* 9, 25 (2008).
91. Fstis, G. et al. High differentiation among eight villages in a seduced area of Sardinia revealed by genome-wide high density SNPs analysis. *PLoS One* 4, e4654 (2009).
92. Bochud, M. et al. Association between white-coat effect and blunted dipping of nocturnal blood pressure. *Am J Hypertens* 22, 1054-61 (2009).
93. Choi, H.K., Atkinson, K., Karlson, E.W., Willett, W. & Curhan, G. Purine-rich foods, dairy and protein intake, and the risk of gout in men. *The New England journal of medicine* 350, 1093-103 (2004).
94. Choi, H.K., Atkinson, K., Karlson, E.W., Willett, W. & Curhan, G. Alcohol intake and risk of incident gout in men: a prospective study. *Lancet* 363, 1277-81 (2004).
95. Choi, H.K. & Curhan, G. Soft drinks, fructose consumption, and the risk of gout in men: prospective cohort study. *BMJ* 336, 309-12 (2008).
96. Choi, H.K., Willett, W. & Curhan, G. Fructose-rich beverages and risk of gout in women. *JAMA : the journal of the American Medical Association* 304, 2270-8 (2010).
97. Choi, H.K. & Curhan, G. Coffee consumption and risk of incident gout in women: the Nurses' Health Study. *The American journal of clinical nutrition* 92, 922-7 (2010).
98. Chambers, J.C. et al. Common genetic variation near MC4R is associated with waist circumference and insulin resistance. *Nature genetics* 40, 716-8 (2008).
99. Taylor, H.A., Jr. et al. Toward resolution of cardiovascular health disparities in African Americans: design and methods of the Jackson Heart Study. *Ethn Dis* 15, S6-4-17 (2005).
100. Fuqua, S.R. et al. Recruiting African-American research participation in the Jackson Heart Study: methods, response rates, and sample description. *Ethn Dis* 15, S6-18-29 (2005).
101. Nakamura, Y. The BioBank Japan Project. *Clinical advances in hematology & oncology : H&O* 5, 696-7 (2007).
102. Kamatani, Y. et al. Genome-wide association study of hematological and biochemical traits in a Japanese population. *Nature genetics* 42, 210-5 (2010).
103. Okada, Y. et al. Genome-wide association study for C-reactive protein levels identified pleiotropic associations in the IL6 locus. *Human molecular genetics* 20, 1224-31 (2011).
104. Short, K.M. & Cox, T.C. Subclassification of the RBCC/TRIM superfamily reveals a novel motif necessary for microtubule binding. *The Journal of biological chemistry* 281, 8970-80 (2006).
105. Sagen, J.V. et al. From dinicogenetic studies of maturity-onset diabetes of the young to unraveling complex mechanisms of glucokinase regulation. *Diabetes* 55, 1713-22 (2006).

106. Goyn, A.L. et al. Insights into the structure and regulation of glucokinase from a novel mutation (V62M), which causes maturity-onset diabetes of the young. *The Journal of biological chemistry* 280, 14105-13 (2005).
107. Hoggard, N. et al. Inhibin betaB expression in murine adipose tissue and its regulation by leptin, insulin and dexamethasone. *Journal of molecular endocrinology* 43, 171-7 (2009).
108. Magnusson, B., Svensson, P.A., Carlsson, L.M. & Sjöholm, K. Activin B inhibits lipolysis in 3T3-L1 adipocytes. *Biochemical and biophysical research communications* 395, 373-6 (2010).
109. Gersch, R.P. & Hadjiargyrou, M. *Mustn1* is expressed during chondrogenesis and is necessary for chondrocyte proliferation and differentiation in vitro. *Bone* 45, 330-8 (2009).
110. Gersch, R.P. et al. *Mustn1* is essential for craniofacial chondrogenesis during *Xenopus* development. *Gene expression patterns: GEP* (2012).
111. Caulfield, M.J. et al. *SLC2A9* is a high-capacity urate transporter in humans. *PLoS medicine* 5, e197 (2008).
112. Vitart, V. et al. *SLC2A9* is a newly identified urate transporter influencing serum urate concentration, urate excretion and gout. *Nature genetics* 40, 437-42 (2008).
113. Anzai, N. et al. Plasma urate level is directly regulated by a voltage-driven urate efflux transporter *URAT1* (*SLC2A9*) in humans. *The Journal of biological chemistry* 283, 26834-8 (2008).
114. Matsuo, H. et al. Mutations in glucose transporter 9 gene *SLC2A9* cause renal hypouricemia. *American journal of human genetics* 83, 744-51 (2008).
115. Woodward, O.M. et al. Identification of a urate transporter, *ABCG2*, with a common functional polymorphism causing gout. *Proc Natl Acad Sci U S A* 106, 10338-42 (2009).
116. Matsuo, H. et al. Common defects of *ABCG2*, a high-capacity urate exporter, cause gout: a function-based genetic analysis in a Japanese population. *Science translational medicine* 1, 5ra11 (2009).
117. Wang, P. et al. Human *TMEM174* that is highly expressed in kidney tissue activates *AR-1* and promotes cell proliferation. *Biochemical and biophysical research communications* 394, 993-9 (2010).
118. Miyamoto, K. et al. Cloning and functional expression of a Na(+)-dependent phosphate co-transporter from human kidney: cDNA cloning and functional expression. *The Biochemical journal* 305 ( Pt 1), 81-5 (1995).
119. Reimer, R.J. & Edwards, R.H. Organic anion transport is the primary function of the *SLC17/type I* phosphate transporter family. *Pflügers Archiv : European journal of physiology* 447, 629-35 (2004).
120. Iharada, M. et al. Type 1 sodium-dependent phosphate transporter (*SLC17A1* Protein) is a Cl(-)-dependent urate exporter. *The Journal of biological chemistry* 285, 26107-13 (2010).
121. Biber, J., Custer, M., Werner, A., Kaissling, B. & Murer, H. Localization of *NaPi-1*, a Na/Pi cotransporter, in rabbit kidney proximal tubules. II. Localization by immunohistochemistry. *Pflügers Archiv : European journal of physiology* 424, 210-5 (1993).
122. Shirwany, N.A. & Zou, M.H. AMPK in cardiovascular health and disease. *Acta pharmacologica Sinica* 31, 1075-84 (2010).
123. Olsen, H.S., Cepeda, M.A., Zhang, Q.Q., Rosen, C.A. & Vozzolo, B.L. Human stanniocalcin: a possible hormonal regulator of mineral metabolism. *Proceedings of the National Academy of Sciences of the United States of America* 93, 1792-6 (1996).
124. Gerdin, A.K. et al. Phenotypic screening of hepatocyte nuclear factor (HNF) 4-gamma receptor knockout mice. *Biochemical and biophysical research communications* 349, 825-32 (2006).
125. Kolz, M. et al. Meta-analysis of 28,141 individuals identifies common variants within five new loci that influence uric acid concentrations. *PLoS genetics* 5, e1000504 (2009).

126. Suhre, K. et al. Human metabolic individuality in biomedical and pharmaceutical research. *Nature* 477, 54-60 (2011).
127. Weidemann, M.J. & Krebs, H.A. Acceleration of gluconeogenesis from propionate by DL-carnitine in the rat kidney cortex. *The Biochemical journal* 111, 69-81 (1969).
128. Yang, Q. et al. Multiple genetic loci influence serum urate levels and their relationship with gout and cardiovascular disease risk factors. *Circ Cardiovasc Genet* 3, 523-30 (2010).
129. Missler, M. & Sudhof, T.C. Neurexins: three genes and 1001 products. *Trends in genetics*: TIG 14, 20-6 (1998).
130. Enomoto, A. et al. Molecular identification of a renal urate anion exchanger that regulates blood urate levels. *Nature* 417, 447-52 (2002).
131. Dai, X. et al. The ovo gene required for cuticle formation and oogenesis in flies is involved in hair formation and spermatogenesis in mice. *Genes & development* 12, 3452-63 (1998).
132. Katoh, M. Molecular cloning and characterization of MFRP, a novel gene encoding a membrane-type Frizzled-related protein. *Biochemical and biophysical research communications* 282, 116-23 (2001).
133. Cross, H.E. & Yoder, F. Familial nanophthalmos. *American journal of ophthalmology* 81, 300-6 (1976).
134. Sundin, O.H. et al. Extreme hyperopia is the result of null mutations in MFRP, which encodes a Frizzled-related protein. *Proceedings of the National Academy of Sciences of the United States of America* 102, 9553-8 (2005).
135. Ayala-Ramirez, R. et al. A new autosomal recessive syndrome consisting of posterior microphthalmos, retinitis pigmentosa, foveoschisis, and optic disc drusen is caused by a MFRP gene mutation. *Molecular vision* 12, 1483-9 (2006).
136. G. Ht., Neidhardt, H., Schneider, C. & Pohl, J. Cloning of a new member of the TGF-beta family: a putative new activin beta C chain. *Biochemical and biophysical research communications* 206, 608-13 (1995).
137. Hashimoto, O. et al. cDNA cloning and expression of human activin beta E subunit. *Molecular and cellular endocrinology* 194, 117-22 (2002).
138. Ronimus, R.S. & Morgan, H.W. Cloning and biochemical characterization of a novel mouse ADP-dependent glucokinase. *Biochemical and biophysical research communications* 315, 652-8 (2004).
139. Seghatoleslam, A. et al. Analysis of a novel human gene, LOC92912, over-expressed in hypopharyngeal tumours. *Biochemical and biophysical research communications* 339, 422-9 (2006).
140. Harari, D. et al. Neuregulin-4: a novel growth factor that acts through the ErbB-4 receptor tyrosine kinase. *Oncogene* 18, 2681-9 (1999).
141. Bonafe, M. et al. Polymorphic variants of insulin-like growth factor I (IGF-I) receptor and phosphoinositide 3-kinase genes affect IGF-I plasma levels and human longevity: cues for an evolutionarily conserved mechanism of life span control. *The Journal of clinical endocrinology and metabolism* 88, 3299-304 (2003).
142. Miyakawa, H., Woo, S.K., Dahl, S.C., Handler, J.S. & Kwon, H.M. Tonicity-responsive enhancer binding protein, a rel-like protein that stimulates transcription in response to hypertonicity. *Proceedings of the National Academy of Sciences of the United States of America* 96, 2538-42 (1999).
143. Kanamaru, M. et al. Aldose reductase inhibitory and uricosuric activities of FK366 in healthy volunteers. *Journal of clinical pharmacology* 33, 1122-31 (1993).
144. Lopez-Rodriguez, C. et al. Loss of NFAT5 results in renal atrophy and lack of tonicity-responsive gene expression. *Proceedings of the National Academy of Sciences of the United States of America* 101, 2392-7 (2004).

145. MacLean, H.E et al. Absence of transcription factor c-maf causes abnormal terminal differentiation of hypertrophic chondrocytes during endochondral bone development. *Developmental biology* 262, 51-63 (2003).
146. Teumer, A. et al. Genome-wide association study identifies four genetic loci associated with thyroid volume and goiter risk. *American journal of human genetics* 88, 664-73 (2011).
147. Gururaj, A.E et al. MTA1, a transcriptional activator of breast cancer amplified sequence 3. *Proceedings of the National Academy of Sciences of the United States of America* 103, 6670-5 (2006).
148. Ishizuka, T. et al. The human phosphoribosylpyrophosphate synthetase-associated protein 39 gene (PRPSAP1) is located in the chromosome region 17q24-q25. *Genomics* 33, 332-4 (1996).
149. Roessler, B.J. et al. Human X-linked phosphoribosylpyrophosphate synthetase superactivity is associated with distinct point mutations in the PRPS1 gene. *The Journal of biological chemistry* 268, 26476-81 (1993).
150. Cleinikov, A.V., Zhao, J. & Makker, S.P. Cytosolic adaptor protein Dab2 is an intracellular ligand of endocytic receptor gp600/megalin. *The Biochemical journal* 347 Pt 3, 613-21 (2000).
151. Li, J., Mahajan, A. & Tsai, M.D. Ankyrin repeat: a unique motif mediating protein-protein interactions. *Biochemistry* 45, 15168-78 (2006).
152. Lang, H.L. et al. A functional and structural basis for TCR cross-reactivity in multiple sclerosis. *Nature immunology* 3, 940-3 (2002).
153. Jin, Y. et al. Genome-wide analysis identifies a quantitative trait locus in the MHC class II region associated with generalized vitiligo age of onset. *The Journal of investigative dermatology* 131, 1308-12 (2011).
154. Clancy, R.M. et al. Identification of candidate loci at 6p21 and 21q22 in a genome-wide association study of cardiac manifestations of neonatal lupus. *Arthritis and rheumatism* 62, 3415-24 (2010).
155. Feng, B.J. et al. Multiple Loci within the major histocompatibility complex confer risk of psoriasis. *PLoS genetics* 5, e1000606 (2009).
156. Sweetman, W.A. et al. SSCP and segregation analysis of the human type X collagen gene (COL10A1) in heritable forms of chondrodysplasia. *American journal of human genetics* 51, 841-9 (1992).
157. Lamas, J.R. et al. Large-scale gene expression in bone marrow mesenchymal stem cells: a putative role for COL10A1 in osteoarthritis. *Annals of the rheumatic diseases* 69, 1880-5 (2010).
158. Courtis, G., Morgan, J.G., Campbell, L.A., Fourel, G. & Crabtree, G.R. Interaction of a liver-specific nuclear factor with the fibrinogen and alpha 1-antitrypsin promoters. *Science* 238, 688-92 (1987).
159. Lauc, G. et al. Genomics meets glycomics—the first GWAS study of human N-Glycome identifies HNF1alpha as a master regulator of plasma protein fucosylation. *PLoS genetics* 6, e1001256 (2010).
160. Cheret, C., Doyen, A., Yaniv, M. & Pontoglio, M. Hepatocyte nuclear factor 1 alpha controls renal expression of the Npt1-Npt4 anionic transporter locus. *Journal of molecular biology* 322, 929-41 (2002).
161. Sekine, T. et al. Identification of multispecific organic anion transporter 2 expressed predominantly in the liver. *FEBS letters* 429, 179-82 (1998).
162. Sato, M. et al. Renal secretion of uric acid by organic anion transporter 2 (OAT2/SLC22A7) in human. *Biol Pharm Bull* 33, 498-503 (2010).
163. Hirai, T. & Chida, K. Protein kinase Czeta (PKCzeta): activation mechanisms and cellular functions. *Journal of biochemistry* 133, 1-7 (2003).

164. Bandyopadhyay, G, Standaert, M.L, Galloway, L, Moscat, J & Farese, R.V. Evidence for involvement of protein kinase C (PKC)-zeta and noninvolvement of diacylglycerol-sensitive PKCs in insulin-stimulated glucose transport in L6 myotubes. *Endocrinology* 138, 4721-31 (1997).
165. Bandyopadhyay, G et al. PKC-zeta mediates insulin effects on glucose transport in cultured preadipocyte-derived human adipocytes. *The Journal of clinical endocrinology and metabolism* 87, 716-23 (2002).
166. Pastalkova, E et al. Storage of spatial information by the maintenance mechanism of LTP. *Science* 313, 1141-4 (2006).
167. Barros, S.A et al. Activation of protein kinase C-zeta increases OAT1 (SLC22A6)- and OAT3 (SLC22A8)-mediated transport. *The Journal of biological chemistry* 284, 2672-9 (2009).
168. Bakhiya, A., Bahn, A., Burckhardt, G. & Wolff, N. Human organic anion transporter 3 (hOAT3) can operate as an exchanger and mediate secretory urate flux. *Cellular physiology and biochemistry : international journal of experimental cellular physiology, biochemistry, and pharmacology* 13, 249-56 (2003).
169. Semenza, G.L. & Wang, G.L. A nuclear factor induced by hypoxia via de novo protein synthesis binds to the human erythropoietin gene enhancer at a site required for transcriptional activation. *Molecular and cellular biology* 12, 5447-54 (1992).
170. Forsythe, J.A. et al. Activation of vascular endothelial growth factor gene transcription by hypoxia-inducible factor 1. *Molecular and cellular biology* 16, 4604-13 (1996).
171. Jung, F., Palmer, L.A., Zhou, N. & Johns, R.A. Hypoxic regulation of inducible nitric oxide synthase via hypoxia inducible factor-1 in cardiac myocytes. *Circulation research* 86, 319-25 (2000).
172. Semenza, G.L., Roth, P.H., Fang, H.M. & Wang, G.L. Transcriptional regulation of genes encoding glycolytic enzymes by hypoxia-inducible factor 1. *The Journal of biological chemistry* 269, 23757-63 (1994).
173. Krishnamurthy, P. & Schuetz, J.D. The ABC transporter Abcg2/Bcrp: role in hypoxia mediated survival. *Biometals : an international journal on the role of metal ions in biology, biochemistry, and medicine* 18, 349-58 (2005).
174. Kietzmann, T., Kronen-Herzig, A. & Jungermann, K. Signaling cross-talk between hypoxia and glucose via hypoxia-inducible factor 1 and glucose response elements. *Biochemical pharmacology* 64, 903-11 (2002).
175. Webster, J.A. et al. Genetic control of human brain transcript expression in Alzheimer disease. *American journal of human genetics* 84, 445-58 (2009).
176. Abdullah, H.I., Pedraza, P.L., McGiff, J.C. & Ferreri, N.R. Calcium-sensing receptor signaling pathways in medullary thick ascending limb cells mediate COX-2-derived PGE<sub>2</sub> production: functional significance. *American journal of physiology. Renal physiology* 295, F1082-9 (2008).
177. Tsuchida, K et al. Activin isoforms signal through type I receptor serine/threonine kinase ALK7. *Molecular and cellular endocrinology* 220, 59-65 (2004).
178. Watanabe, R. Activin receptor-like kinase and the insulin gene. *Vitamins and hormones* 85, 1-27 (2011).
179. Margariti, A. et al. Histone deacetylase 7 controls endothelial cell growth through modulation of beta-catenin. *Circulation research* 106, 1202-11 (2010).
180. Wang, S et al. Control of endothelial cell proliferation and migration by VEGF signaling to histone deacetylase 7. *Proceedings of the National Academy of Sciences of the United States of America* 105, 7738-43 (2008).
181. Tin, A. et al. Genome-wide association study for serum urate concentrations and gout among African Americans identifies genomic risk loci and a novel URAT1 loss-of-function allele. *Hum Mol Genet* 20, 4056-68 (2011).
182. Li, Y., Willer, C.J., Ding, J., Scheet, P. & Abecasis, G.R. MaCH: using sequence and genotype data to estimate haplotypes and unobserved genotypes. *Genetic epidemiology* 34, 816-34 (2010).
